# Supplementary material for: PIK3CA inhibition in models of proliferative glomerulonephritis and lupus nephritis
Source: PubMed Central journal article supplement (PMC11290976; doi:10.1172/jci176402), 2024-06-06
Supplement: jci-134-176402-s109.pdf [file jci-134-176402-s109.pdf]

## **SUPPLEMENTAL MATERIALS**

### **PIK3CA inhibition in models of proliferative glomerulonephritis and lupus nephritis**

Junna Yamaguchi (MD, PhD)<sup>1,2,3</sup>, Pierre Isnard (MD, PhD)<sup>1,3,4</sup>, Noémie Robil (PhD)<sup>5</sup>, Pierre de la Grange (PhD)<sup>5</sup>, Clément Hoguein (BSc)<sup>1,2,3</sup>, Alain Schmitt (BSc)<sup>6</sup>, Aurélie Humel (MD)<sup>7</sup>, Jérôme Megret (PhD)<sup>8</sup>, Nicolas Goudin (PhD)<sup>8</sup>, Marine Luka (PhD)<sup>9,10</sup>, Mickael Menager (PhD)<sup>9,10</sup>, Cécile Masson (PhD)<sup>11</sup>, Mohammed Zarhrate (BSc)<sup>12</sup>, Christine Bôle-Feysot (PhD)<sup>12</sup>, Michalina Janiszewska (MD, PhD)<sup>13</sup>, Kornelia Polyak (MD, PhD)<sup>14,15</sup>, Julien Dairou (PhD)<sup>1,16</sup>, Sara Baldassari (PhD)<sup>17</sup>, Stéphanie Baulac (PhD)<sup>17</sup>, Christine Broissand (PhD)<sup>18</sup>, Christophe Legendre (MD, PhD)<sup>1,3,7</sup>, Fabiola Terzi (MD, PhD)<sup>3</sup>, Guillaume Canaud (MD, PhD)<sup>1,2,3</sup>

#### **List of Supplemental Materials**

Supplemental Methods

Supplemental references

Supplemental Figures 1-14

Supplemental Tables 1-2

## **Supplemental methods**

### ***Animal studies***

For the uninephrectomy experiments, the right kidneys were removed under anesthesia. For the medical treatment of mice, 50 mg kg<sup>-1</sup> alpelisib (MedChem Tronica) in 1% carboxymethylcellulose (Sigma Aldrich) + 0.5% Tween (Sigma Aldrich) or vehicle (1% carboxymethylcellulose + 0.5% Tween) was administered by oral gavage daily for the indicated time. In addition, blood and urine were obtained at the indicated times. At euthanasia, blood, urine, and kidneys were harvested. In some experiments, the spleen, heart, and bone marrow (BM) in femurs and tibias were also harvested. Tissues were fixed in 4% paraformaldehyde and embedded in paraffin for immunohistochemical analysis, snap-frozen in the Optimal Cutting Temperature (OCT), stored at -80 °C for mRNA or protein analysis, or fixed in 2.5% glutaraldehyde solution for electron microscopy analysis.

### ***Mouse blood and urine measurements***

Mouse blood counts were analyzed using a hematology analyzer (ProCyte Dx; IDEXX Laboratories). Mouse serum creatinine, blood urea nitrogen, urinary albumin, and urinary creatinine were evaluated using an AU5800 (Beckman Coulter) autoanalyzer. Serum anti-dsDNA measurement was performed according to the manufacturer's instructions using mouse anti-dsDNA ELISA kit (LBIS), and its absorbance was measured using an Infinite M Nano (TECAN). Serum cytokine measurements were performed according to the manufacturer's instructions using the V-PLEX<sup>®</sup> proinflammatory panel 1 mouse kit (Meso Scale Discovery, MSD).

### ***Histopathology and immunohistochemistry analysis***

For paraffin embedded sections, after deparaffinization, antigen retrieval was performed with citrate buffer (pH6) or Tris-EDTA buffer (pH9 or pH6) using a microwave, pressure cooker, or high temperature (95 °C). The endogenous peroxidase activity was quenched using 3% hydrogen peroxide; nonspecific protein binding was blocked using 2.5% normal horse serum (Vector Laboratories), and the endogenous biotin activity was quenched using the Avidin/Biotin Blocking Kit (Vector Laboratories). When using mouse primary antibodies on mouse tissue, Klear mouse blocking reagent (Diagomics) was used to block endogenous mouse immunoglobulins. After blocking, the tissue sections were incubated with the primary antibodies overnight at 4 °C. The following primary antibodies were used: rabbit anti-Ki-67 antibody (SP6; Thermo Fisher Scientific),

rabbit anti-P-S6RP antibody (D68F8; Cell Signaling Technology), mouse anti-P-AKT (Ser<sup>473</sup>) antibody (587F11; Cell Signaling Technology), rabbit anti-P-AKT (Thr<sup>308</sup>) antibody (C31E5E; Cell Signaling Technology), mouse anti-S6RP antibody (54E2; Cell Signaling Technology), chicken anti-GFP antibody (ab13970; Abcam), guinea pig anti-Nephrin antibody (GP-N2; Progen), rabbit anti-Podocin antibody (P0372; Sigma Aldrich), mouse anti-Nestin antibody (4D11, Novus Biologicals), mouse anti-synaptopodin antibody (G1D4, Progen), rat anti-CD44 antibody (IM7, BD Biosciences), and mouse anti-WT1 antibody (6F-H2; DAKO). The corresponding secondary antibodies, including anti-mouse IgG (Thermo Fisher Scientific), anti-rabbit IgG (Thermo Fisher Scientific), anti-guinea pig IgG (Thermo Fisher Scientific), anti-chicken IgG (Abcam), biotinylated anti-rabbit IgG (Vector Laboratories), and biotinylated anti-mouse IgG (Vector Laboratories) were applied. For the Avidin/Biotin detection, an R.T.U. Vectastain Kit (Vector Laboratories) or streptavidin (Thermo Fisher Scientific) was used. The immunoreactive antigen sites were detected with hydrogen peroxide and diaminobenzidine. For alkaline phosphatase detection, alkaline phosphatase conjugate streptavidin (Thermo Fisher Scientific) and BCIP/NBT Substrate Kit (Vector Laboratories) were used. For frozen immunofluorescent staining, frozen tissue sections (4 µm) were briefly air dried and fixed in 50% methanol/50% acetone. Then, sections were blocked with 2.5% normal horse serum and incubated overnight at 4 °C with the following primary antibodies: guinea pig anti-Nephrin (GP-N2; Progen), rabbit anti-Ki-67 (SP6; Thermo Fisher Scientific), chicken anti-GFP antibody (ab13970; Abcam), rat anti-PDGFRβ (APB5, eBioscience™), rat anti-CD3 (17A2, eBioscience™), or rat anti-F4/80 (A3-1, Bio-Rad Laboratories), or mouse anti-P-AKT (Ser<sup>473</sup>) antibody (587F11; Cell Signaling Technology). The sections were then incubated at room temperature for 40 min with the following secondary antibodies: fluorescein isothiocyanate-conjugated (FITC) anti-mouse IgG (Sigma Aldrich), FITC anti-mouse IgM (BD Biosciences), FITC anti-mouse C3 (Abcam) or the corresponding secondary antibodies for the primary antibodies including anti-mouse IgG (Thermo Fisher Scientific), anti-rabbit IgG (Thermo Fisher Scientific), anti-guinea pig IgG (Thermo Fisher Scientific), biotinylated anti-rabbit IgG (Vector Laboratories), and anti-chicken IgG.

### ***Electron microscopy analysis***

The fixed samples were washed 3 times in PBS. Samples were postfixed in 1% osmium tetroxide 0.1M (Electron Microscopy Science, UK) in 0.1 M Phosphate Buffer (PB) (pH 7.4). Samples were washed 3 times in H<sub>2</sub>O. Samples were dehydrated in alcohol grades :70% Ethanol 10 min, 90% Ethanol 10min, 100% Ethanol 3x15min, 100% Propylene oxide (Electron Microscopy Science, UK) 2X5min. Epikote 812 was prepared with

these proportions: 12.5 mL Embed 812, 7.5 mL Araldite 502, 27 mL DDSA, 1.3 mL DMP30 (kit (Electron Microscopy Science, UK). Resin infiltration was performed as following: mix 1:1 Epikote 812 : propylene oxide 30 min followed by mix 1:2 Epikote 812 : propylene oxide overnight room temperature. Samples were washed in 100% Epikote 812 then embedded in 4mm gelatine capsules in 100% Epikote 812, and Polymerised in 60°C oven for 24hours. Ultrathin sections were cut at 90 nm with a Leica UFC7 ultramicrotom (Leica Microsystems GmbH, Germany) and deposited on Gilder grids 200 mesh (Electron Microscopy Science, UK), They were counterstained with uranyl acetate 7% (LFG, France) and Reynold's lead citrate (LFG, France).

### ***cDNA synthesis and quantitative RT-PCR analysis***

Total RNA in the kidney cortex was extracted using NucleoSpin RNA (Macherey Nagel). Complementary DNA was reverse-transcribed using a TaqMan high-capacity cDNA RT kit (Thermo Fisher Scientific). qPCR was performed with iTaq universal SYBR Green Supermix (Bio-Rad Laboratories) using a CFX Connect real-time system (Bio-Rad Laboratories). The expression levels were analyzed using the delta-delta Ct method. *Hypoxanthine phosphoribosyltransferase (Hprt)* was used as the normalization control.

### ***Western blotting***

Protein extracts in RIPA buffer from the kidney cortex were separated by SDS-PAGE, transferred onto the membrane and incubated with antibodies, and followed by the appropriate peroxidase-conjugated secondary antibody incubation. The following primary antibodies were used: rabbit anti-P-S6RP antibody (D68F8; Cell Signaling Technology), rabbit anti-P-AKT (Ser<sup>473</sup>) antibody (D9E; Cell Signaling Technology), rabbit anti-P-AKT (Thr<sup>308</sup>) antibody (C31E5E; Cell Signaling Technology), mouse anti-S6RP antibody (54E2; Cell Signaling Technology), mouse anti-Akt (pan) antibody (40D4, Cell Signaling Technology), chicken anti-GFP antibody (ab13970; Abcam), mouse anti-alpha-tubulin antibody (B-5-1-2; Sigma Aldrich), rabbit anti-Nephrin antibody (29070; IBL), and rabbit anti-Podocin antibody (P0372; Sigma Aldrich). The chemiluminescence was acquired using ChemiDoc MP (Bio-Rad Laboratories) and densitometry was performed using Image Lab software (Bio-Rad Laboratories, version 6.0.1).

### ***Flow cytometry***

For lymphocyte, granulocyte and monocyte lineage analysis, anti-CD3a antibody (500A2; Becton Dickinson), anti-CD4 antibody (L3T4; Becton Dickinson), anti-CD8a antibody (63-6.72; Becton Dickinson), anti-B220



antibody (RA3-6B2; Becton Dickinson), anti-CD11b antibody (M1/70; Becton Dickinson), anti-Ly6G antibody (RB6-8C5; Becton Dickinson), and CD16/CD32 (2.4G2; Becton Dickinson) were used. Cells were resuspended in 0.2 to 1 mL of PBS + 2%FCS + 2  $\mu$ L of 7-aminoactinomycin D (7-AAD, Thermo Fischer Scientific).

### ***Imaging flow cytometry (Amnis ImageStream)***

Following the single-cell suspension procedure, flow cytometry cell preparation was conducted by essentially following the Flow Cytometry Protocol by Cell Signaling Technology. Briefly, cell samples were fixed with 4% PFA for 15 min, permeabilized with methanol on ice, and resuspended in PBS after several washes. The samples were labeled with rabbit anti-P-S6RP-AF647 antibody (D68F8; Cell Signaling Technology) and/or rabbit anti-P-Akt<sup>Thr308</sup>-PE antibody (D25E6; Cell Signaling Technology). Rabbit IgG isotype controls (AF647 and PE; Cell Signaling Technology) were used. Resuspended cells were run on an ImageStream ISX mkII (Amnis) that combines flow cytometry with detailed cell imaging. Magnification (40 $\times$ ) was used for all acquisitions. Data were acquired with INSPIRE software (Amnis) and analyzed with IDEAS software (v.6.2, Amnis).

### ***Single-cell RNA-seq barcoding and cDNA synthesis***

The scRNA-seq libraries were generated using a Chromium Single Cell 3' Library & Gel Bead Kit v.3 (10x Genomics) according to the manufacturer's protocol. Briefly, suspended single-cells were counted, diluted at 1,000 cells/ $\mu$ L in PBS + 0.04% BSA, and 20,000 cells were loaded in the 10x Chromium Controller to generate single-cell gel-beads in an emulsion. After reverse transcription, the gel-beads in the emulsion were disrupted. Then, barcoded complementary DNA was isolated and amplified by PCR. Following fragmentation, end repair and A-tailing, sample indexes were added during index PCR. An equimolar pool of the 4 individual 10X Genomics Single Cell Expression 3' V3 libraries was prepared by the Imagine Genomic Core Facility and sequenced on an S2 FlowCell using the NovaSeq6000, Illumina (sequencing mode Paired-End 100+100 bases + indexes). A total of 2 billion reads were targeted for this pool of 4 libraries (500 million reads per library).

### ***Single-cell RNA-seq pre-processing***

Sequencing data quality analysis was performed using FastQC v0.11.2 on 4 samples. For read alignment and quantification of unique molecular identifiers (UMI), CellRanger software v3.0.2 was used on Mus Musculus genome mm10 with default parameters and gene annotation from Ensembl 100 (plus eGFP and tdTomato). The 4 expression matrices containing the UMI counts were merged, and only the genes with UMI  $\geq 1$  in at least one cell were kept. The following filters were applied to generate a global matrix used in further analysis: cells with UMI  $\geq 2000$ , number of detected genes  $\geq 600$ , and cells with UMI in mitochondrial genes  $\leq 60\%$ . For the normalization of UMIs, Seurat 3.1.1 was used(1) and a global-scaling normalization method was applied with a scale factor of 10,000 and log-transformation of data. This was followed by a scaling linear transformation step to avoid highly-expressed genes with a higher weight in downstream analysis.

### ***Clustering and marker genes***

PCA was performed on the scaled data with a Jackstraw plot to choose how many PCs to retain as an input for the Seurat clustering step. The clustering step was performed using default parameters, the Louvain algorithm as the clustering method, and 15 PC and a resolution parameter defining the cluster granularity set to 0.5. Marker genes defining each cluster were found via differential expression testing with a Wilcoxon rank sum test and a log fold change threshold of 1.

### ***Trajectory analysis***

The Monocle single-cell trajectory was constructed using M3Drop(2) and Monocle 2.10.1(3). Input genes for the Monocle trajectory construction were selected using an unsupervised approach via the M3Drop result, which identifies differentially expressed genes based on a Michaelis-Menten function for the relationship between mean expression and dropout rate with the relevant genes being the ones shifting above a fitted curve. The default Monocle workflow was then performed to generate the trajectories.

### ***Enrichment analysis***

An analysis for enriched KEGG pathways and Gene Ontology (GO) terms was performed using the WebGestaltR package(3) on databases from the Mus Musculus organism. GO terms and pathways were considered enriched if fold enrichment was  $\geq 2.0$ , the uncorrected p-value was  $\leq 0.05$  and a minimum number of regulated genes in pathway/term  $\geq 2.0$  was achieved.

### ***LC-MS analysis of alpelisib***

Each tissue type was homogenized in 100% cold methanol with a tissue-to-solvent ratio of 1-mg tissue to 5- $\mu$ l methanol. After sonication for 20 s, the tissue extract was centrifuged at 13,000  $\times$  g for 30 min and then injected onto a Phenomenex Kinetex XB-C18 HPLC column (100 mm by 2.1 mm) at 45 °C. Alpelisib was analyzed by reverse-phase HPLC (Shimadzu LC-MS system 8040 interfaced with LabSolutions software). Twenty micrograms of tissue extracts were injected onto a column, and the mobile phase used for the separation consisted of two eluents as follows: Solvent A was 0.1% formic acid in ddH<sub>2</sub>O, and solvent B was acetonitrile with 0.1% of formic acid. The compounds were separated using the following discontinuous gradient at a flow rate of 0.6 ml/min: the initial concentration of 20% in solvent B increased to 70% over 6 min, and this was followed by a decrease to 20% over the next minute and the initial conditions were then maintained for 14 min. The alpelisib was monitored spectrophotometrically by absorbance (photodiode detector) from 205 to 600 nm and by tandem mass detection. The mass measurement was implemented in positive ion mode using multiple reaction monitoring (MRM) with an electrospray ionization source. Three MRM transitions for alpelisib are used as follows: 442.1 > 328.0, 442.1 > 288.0, and 442.1 > 115.1. Quantification was conducted by integration of the peak absorbance area using a calibration curve established with various known concentrations of alpelisib.

### ***Spatial transcriptomics***

Briefly, 4  $\mu$ m of AFA-fixed paraffin-embedded human samples were baked overnight at 37 °C and 1 hour at 65 °C, and then they were processed on a Leica automation platform with a protocol including three major steps as follows: 1) slide baking, 2) antigen retrieval for 20min at 100 °C, and 3) 1.0ug/ml proteinase K treatment for 15min. After taking the slide off of the Leica, they were incubated with a GeoMx WTA assay probe cocktail overnight. The following day, the slides were washed and applied with morphology marker incubation before loading onto the GeoMx machine. On the GeoMx machine, slides were fluorescently scanned and finished ROI selection. Barcodes were collected and subsequent barcoding readings were performed on an Illumina NGS platform. Individual counts were normalized against the 75th percentile of the signal from their own ROI (Q3 Normalization).

### ***Human PBMC flow cytometry experiment and supernatant cytokine measurement***

PBMC were sorted for CD3<sup>+</sup> T cells and CD19<sup>+</sup> B cells with anti-CD3 (clone UCHT1, Sony Biotechnology), anti-CD19 (clone HIB19, Sony Biotechnology), and 7-AAD using BD FACS Aria II SORP. CD3<sup>+</sup> T cells or CD19<sup>+</sup> B cells were incubated in RPMI 1640 media (Thermo Fischer Scientific) containing 10% FBS, 2mM glutamine, 100 U/ml penicillin and streptomycin (Thermo Fischer Scientific). To stimulate T cells, Dynabeads™ Human T-Activator CD3/CD28 (Thermo Fischer Scientific, ref. 11161D) and 1000 U/mL recombinant human interleukin-2 (IL-2) (Proteintech, ref. 200-02) were used. To stimulate B cells, 2.5 ug/ml resiquimod (Sigma Aldrich, ref. SML0196) and 1000 U/mL recombinant human IL-2 were used. For in vitro experiments, alpelisib was dissolved in DMSO (5mM) as a stock solution and T cells or B cells were pre-treated with the indicated concentration of alpelisib for 30 min before starting the stimulation or left unstimulated. CD19<sup>+</sup> B cells were collected 16hr after stimulation and treatment, while CD3<sup>+</sup> T cells were collected either 16hr or 7 days after stimulation and treatment. Upon cell collection, the supernatants were also collected. Cells were fixed and permeabilized using BD Cytofix (BD Biosciences, ref. 554655) and Perm Buffer III (BD Biosciences, ref. 558050), followed by intracellular staining with P-S6RP (clone D68F8, Cell Signaling Technologies). CD69 (clone FN50, Sony Biotechnology) was used as activation marker. The flow cytometry analysis was performed with a Sony ID7000™ spectral cell analyzer. Data were analyzed with FlowJo software (TreeStar). Supernatant cytokines were analyzed with a V-PLEX® proinflammatory panel 1 human kit (Meso Scale Discovery, MSD).

## Supplemental references

1. Butler A, Hoffman P, Smibert P, Papalexi E, and Satija R. Integrating single-cell transcriptomic data across different conditions, technologies, and species. *Nature biotechnology*. 2018;36(5):411-20.
2. Andrews TS, and Hemberg M. M3Drop: dropout-based feature selection for scRNASeq. *Bioinformatics*. 2019;35(16):2865-7.
3. Qiu X, Mao Q, Tang Y, Wang L, Chawla R, Pliner HA, et al. Reversed graph embedding resolves complex single-cell trajectories. *Nature methods*. 2017;14(10):979-82.

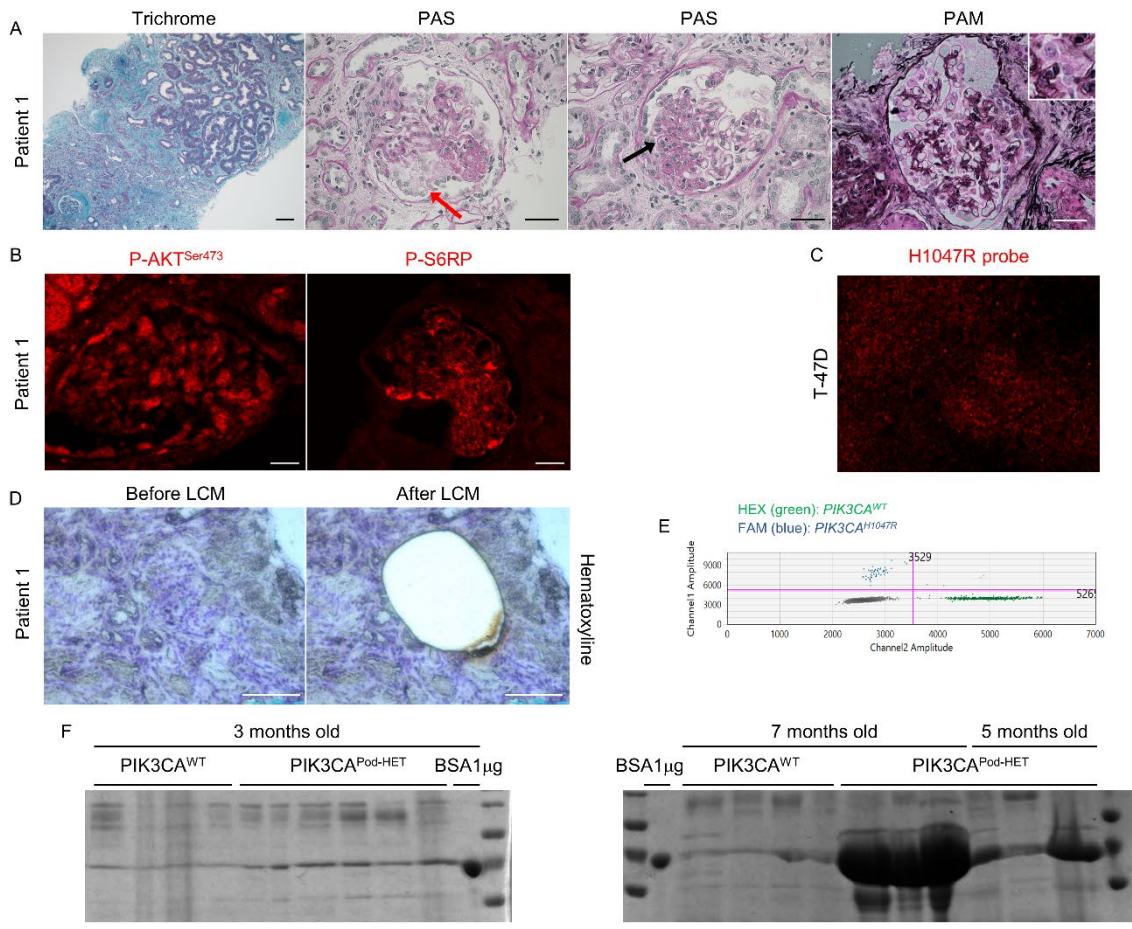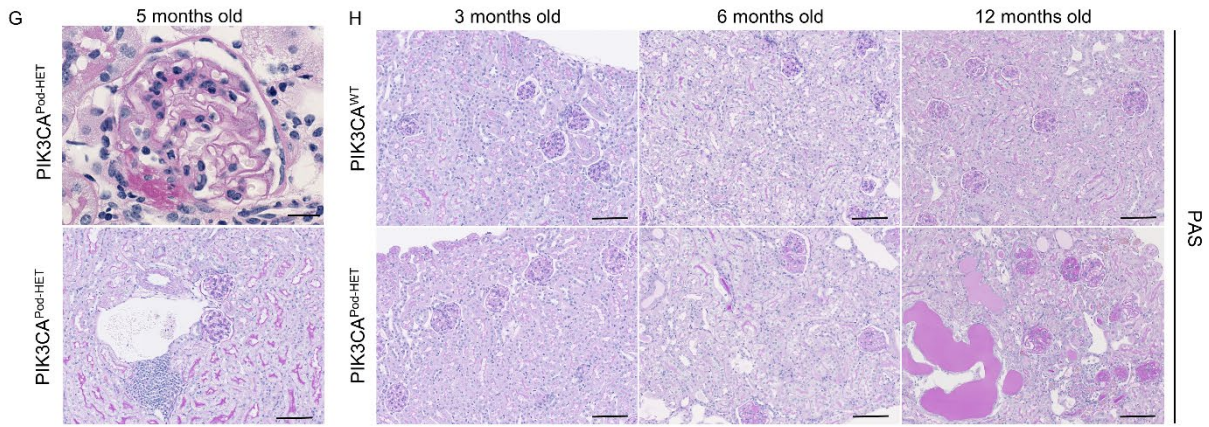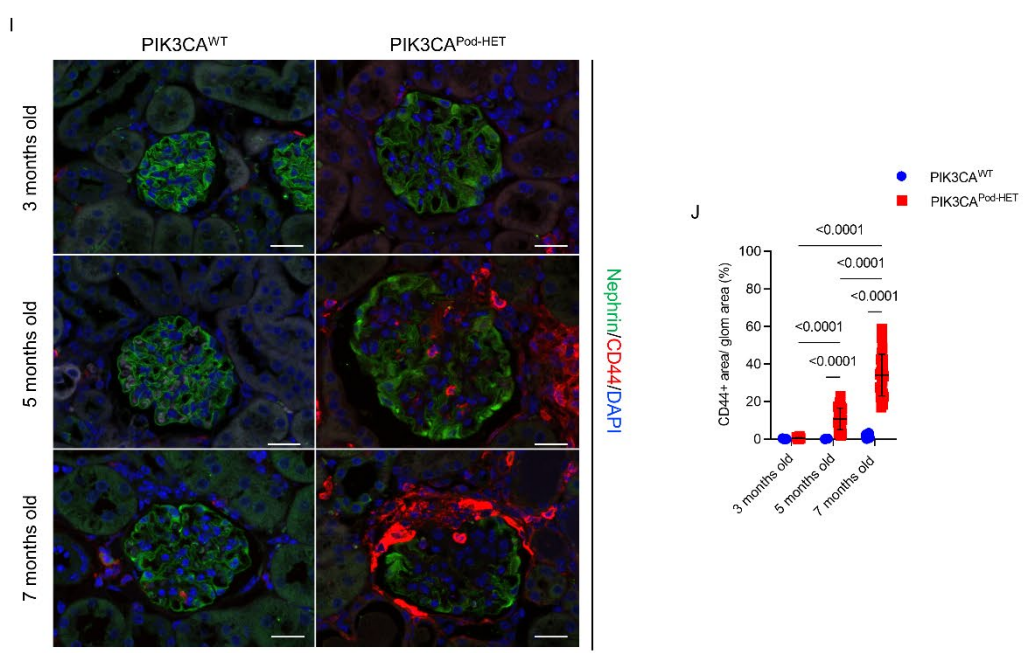

Supplemental Figure 1

**Supplemental Figure 1: *PIK3CA* gain-of-function mutation in podocytes leads to severe glomerular disease.** (A) Trichrome, PAS, and silver staining (PAM) of the kidney biopsy of patient 1. Scale bar 100  $\mu\text{m}$  for Trichrome and 40  $\mu\text{m}$  for PAS and PAM. Black arrow showing hypercellularity, and red arrow showing hypertrophy and hyperplasia of the overlying podocytes. (B) P-AKT<sup>Ser473</sup> and P-S6RP immunofluorescence staining of the kidney biopsy of patient 1. Scale bar 20  $\mu\text{m}$ . (C) *In situ* *H1047* hybridization of the kidney biopsy of T-47D. (D) Hematoxylin staining for glomeruli laser capture microdissection of the kidney biopsy from patient 1. Left: before cutting and right: after cutting. Scale bar 100  $\mu\text{m}$ . (E) Droplet digital PCR result of the glomeruli from the kidney biopsy of patient 1. Channel 1: *H1047R* Mutant probe and Channel 2: *Wild Type* (WT) probe. (F) Representative Coomassie blue staining of 3-, 5-, and 7-month-old *PIK3CA*<sup>WT</sup> and *PIK3CA*<sup>Pod-HET</sup> mice. Bovine serum albumin (BSA) is shown as a positive control. (G) Another PAS staining of 5 months old *PIK3CA*<sup>Pod-HET</sup> mice. Scale bar 25  $\mu\text{m}$  for upper panel, 100  $\mu\text{m}$  for lower panel. (H) Representative PAS staining of 3-, 6-, and 12-month-old *PIK3CA*<sup>WT</sup> and *PIK3CA*<sup>Pod-HET</sup> mice. Scale bar 100  $\mu\text{m}$ . (I) Representative immunofluorescence staining of Nephryn and CD44 in kidneys from *PIK3CA*<sup>WT</sup> and *PIK3CA*<sup>Pod-HET</sup> mice, at 3-, 5- and 7-months old. Scale bar 20  $\mu\text{m}$ . (J). CD44+/ glomerulus area (%) quantification (3-m.o.-*PIK3CA*<sup>WT</sup>, n=4, 3-m.o.-*PIK3CA*<sup>Pod-HET</sup>, n=5, 5-m.o.-*PIK3CA*<sup>WT</sup>, n=5, 5-m.o.-*PIK3CA*<sup>Pod-HET</sup>, n=5, 7-m.o.-*PIK3CA*<sup>WT</sup>, n=4, 7-m.o.-*PIK3CA*<sup>Pod-HET</sup>, n=5). Data are means  $\pm$  SD. P values are calculated using two-way ANOVA with Tukey's post hoc test.



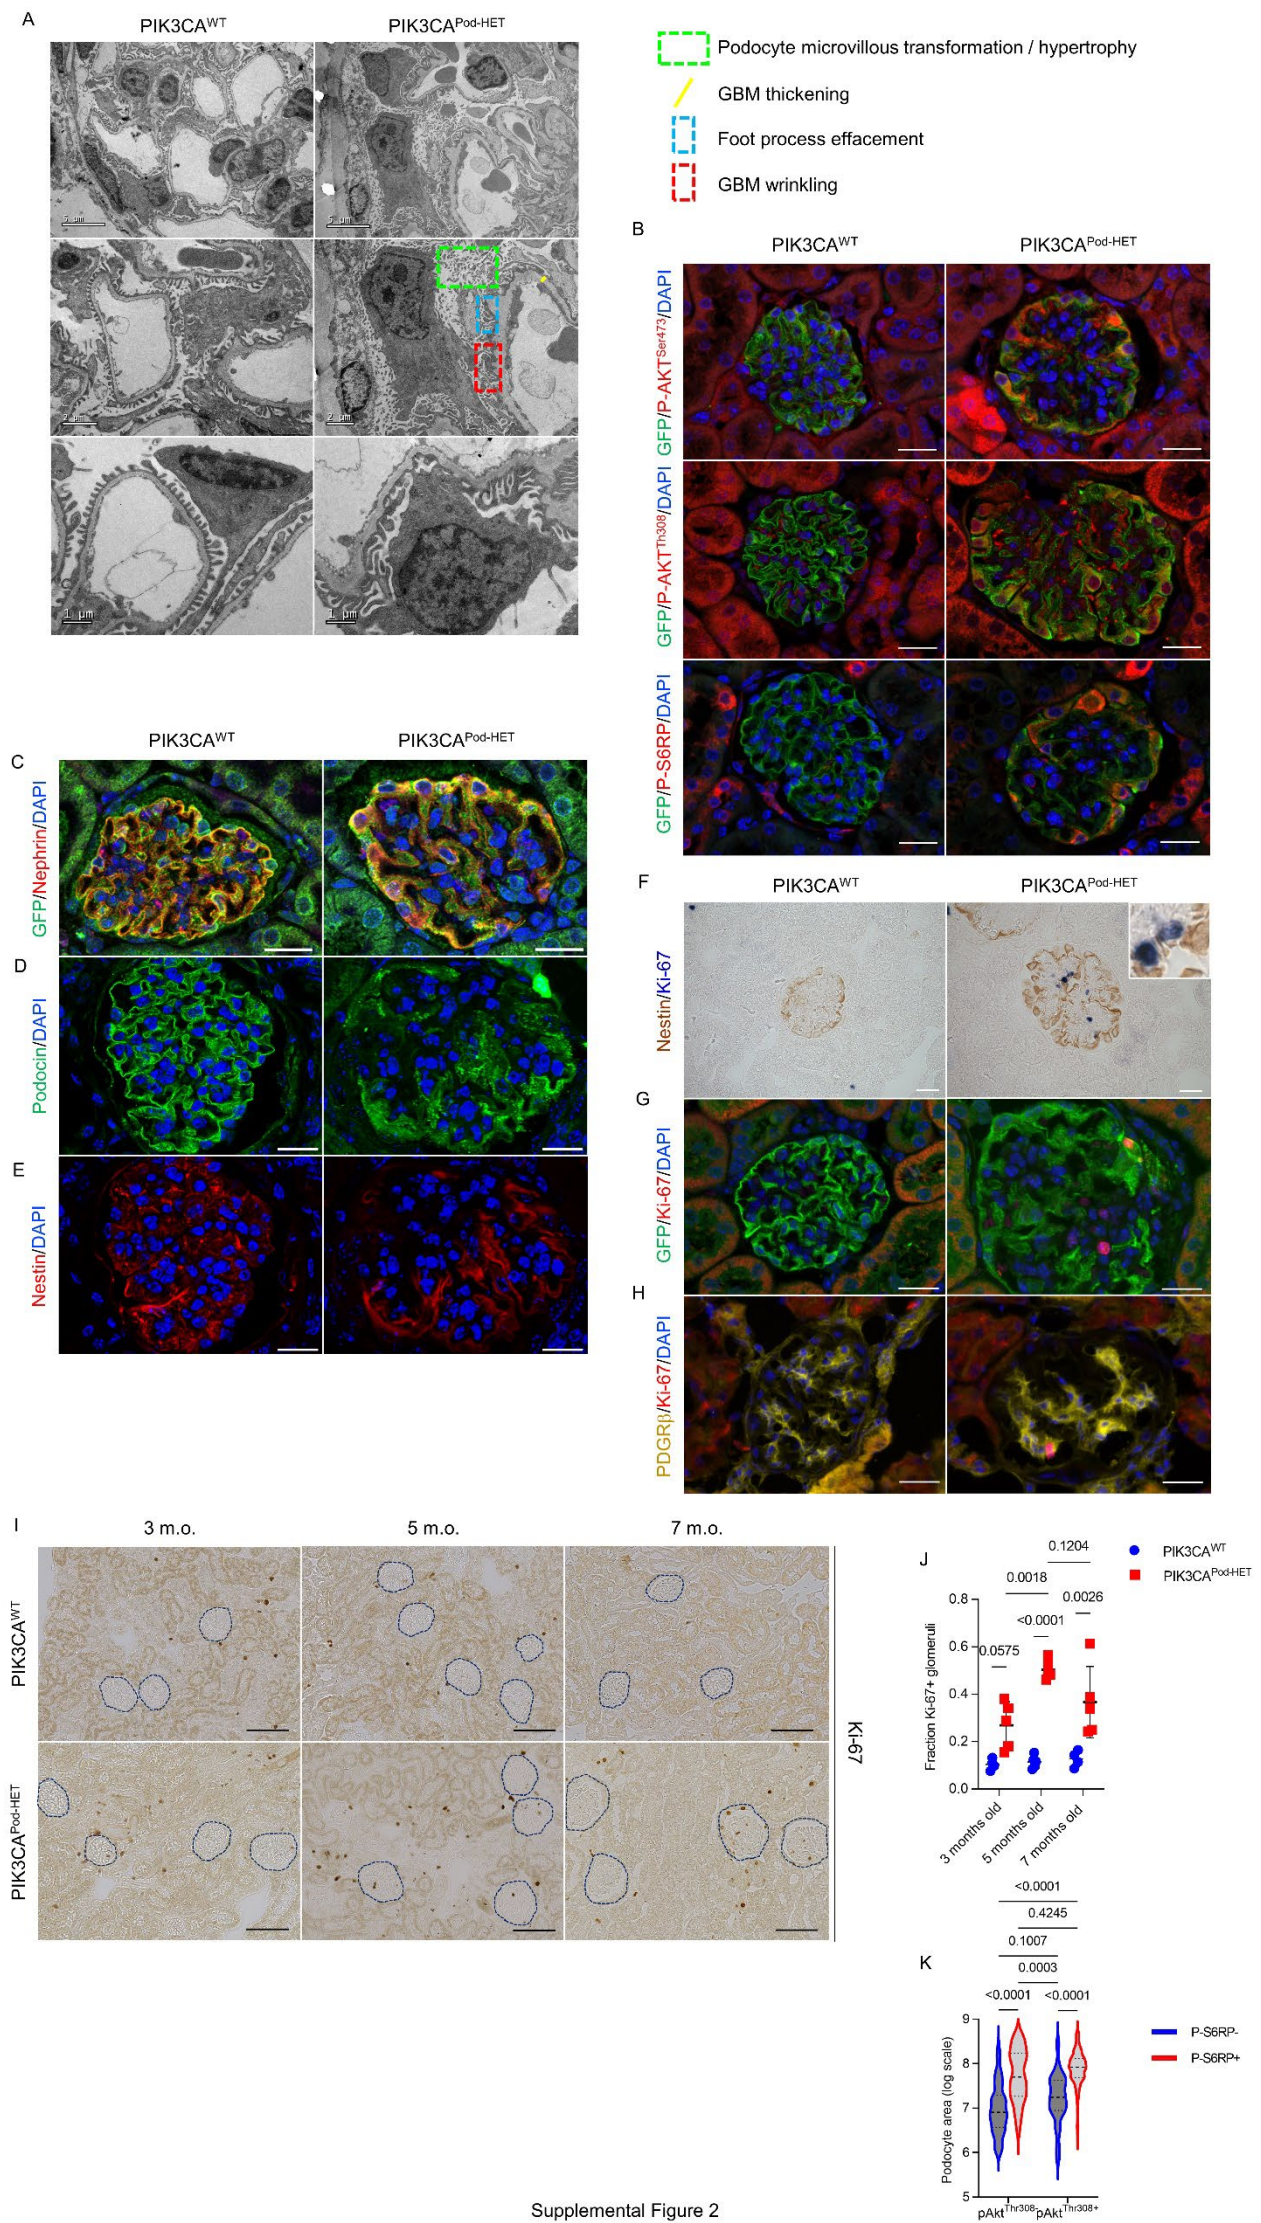

Supplemental Figure 2



**Supplemental Figure 2: *PIK3CA*<sup>Pod-HET</sup> mice characterization.** (A) Representative images of transmission electron microscopy of kidneys from *PIK3CA*<sup>WT</sup> and *PIK3CA*<sup>Pod-HET</sup> mice at 5 months old. (B) Representative coimmunofluorescence staining of P-AKT<sup>Ser473</sup>, P-AKT<sup>Thr308</sup>, P-S6RP and GFP in kidneys from 5-month-old *PIK3CA*<sup>WT</sup> and *PIK3CA*<sup>Pod-HET</sup> mice. Scale bar 20  $\mu$ m. (C) Representative coimmunofluorescence staining of GFP and Nephlin in kidneys from *PIK3CA*<sup>WT</sup> and *PIK3CA*<sup>Pod-HET</sup> mice. Scale bar 20  $\mu$ m. (D) and (E) Representative coimmunofluorescence staining of Podocin and Nestin in kidneys from 5-month-old *PIK3CA*<sup>WT</sup> and *PIK3CA*<sup>Pod-HET</sup> mice. Scale bar 20  $\mu$ m. (F-G) Representative coimmunostaining of Nestin and Ki-67 (F), GFP and Ki-67 (G), PDGFR $\beta$  and Ki-67 (H) in kidneys from 5-month-old *PIK3CA*<sup>WT</sup> and *PIK3CA*<sup>Pod-HET</sup> mice. Scale bar 20  $\mu$ m. (I) Representative Ki-67 immunostaining of kidneys from *PIK3CA*<sup>WT</sup> and *PIK3CA*<sup>Pod-HET</sup> mice at the age of 3, 5 and 7 months. Scale bar 100  $\mu$ m. and (J) Quantification of fraction Ki-67+ glomeruli from *PIK3CA*<sup>WT</sup> and *PIK3CA*<sup>Pod-HET</sup> mice (3-m.o.-*PIK3CA*<sup>WT</sup>, n=4, 3-m.o.-*PIK3CA*<sup>Pod-HET</sup>, n=5, 5-m.o.-*PIK3CA*<sup>WT</sup>, n=5, 5-m.o.-*PIK3CA*<sup>Pod-HET</sup>, n=5, 7-m.o.-*PIK3CA*<sup>WT</sup>, n=4, 7-m.o.-*PIK3CA*<sup>Pod-HET</sup>, n=5). (K) Amnis ImageStream analysis of isolated podocytes from 4-month-old *PIK3CA*<sup>WT</sup> and *PIK3CA*<sup>Pod-HET</sup> mice (n=2 mice per group). GFP+ podocytes were labelled with P-AKT<sup>Thr308</sup> and P-S6RP. Data are means  $\pm$  SD. P values are calculated using two-way ANOVA with Tukey's post hoc test (J, K).

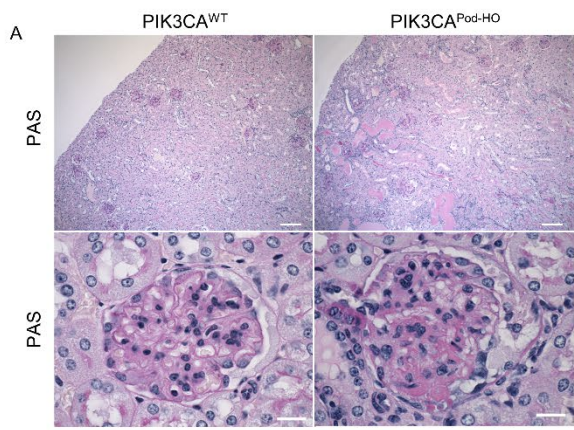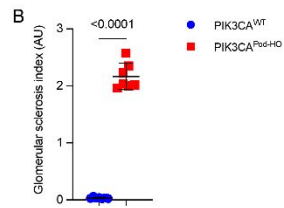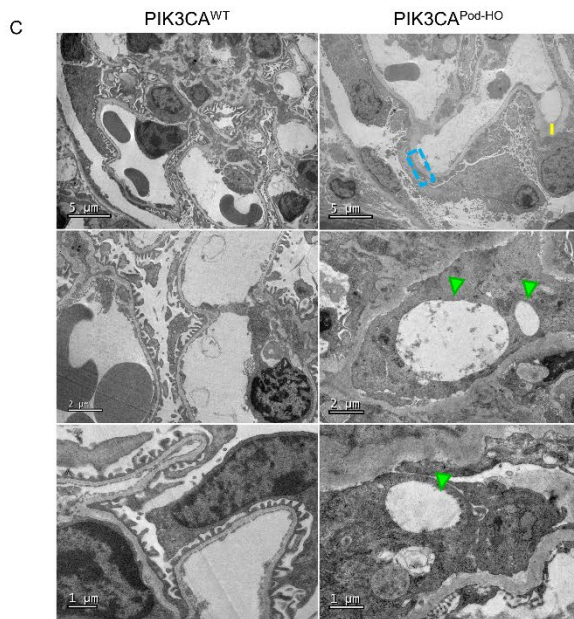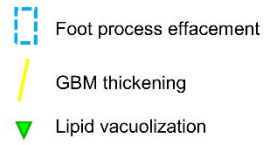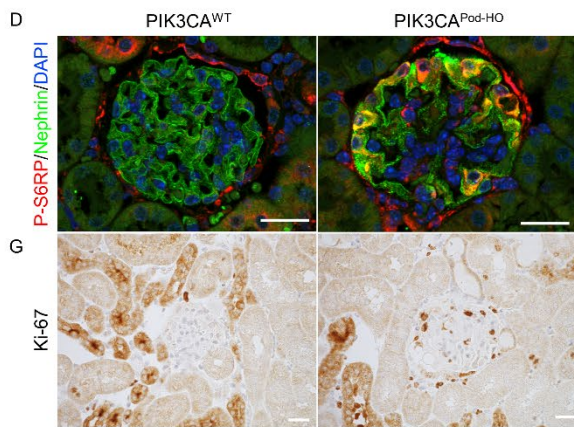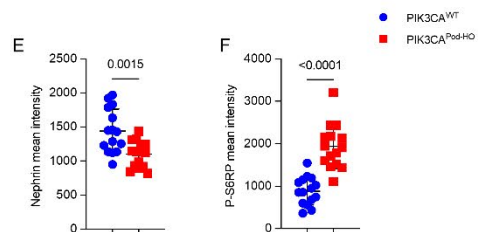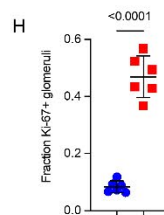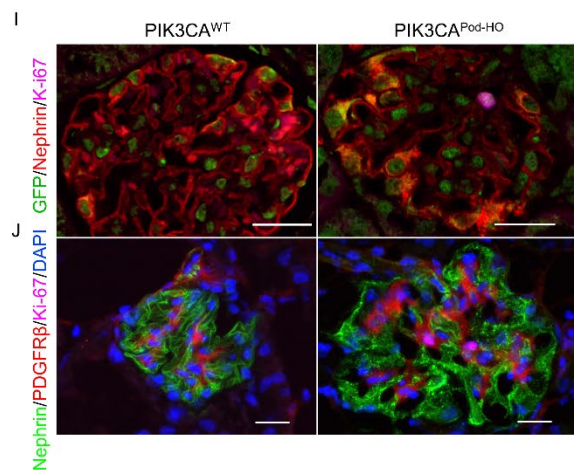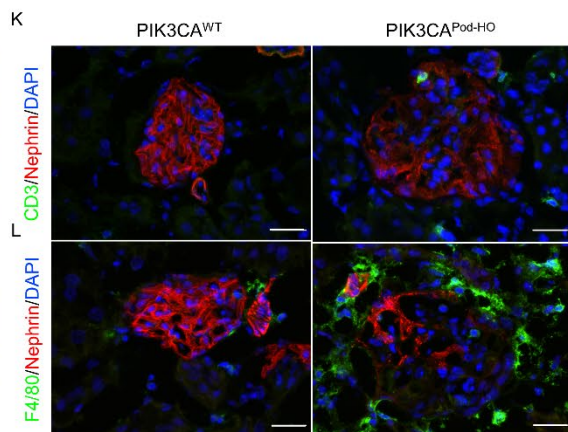

**Supplemental Figure 3: *PIK3CA*<sup>Pod-HO</sup> mice characterization.** (A) Representative PAS staining and (B) GS index quantification from 3-month-old *PIK3CA*<sup>WT</sup> and *PIK3CA*<sup>Pod-HO</sup> mice kidneys (n=6 per group). (C) Representative images of transmission electron microscopy of kidneys from *PIK3CA*<sup>WT</sup> and *PIK3CA*<sup>Pod-HO</sup> mice at 4 months old. (D-L) 3-month-old *PIK3CA*<sup>WT</sup> and *PIK3CA*<sup>Pod-HO</sup> mice kidneys (n=6 per group). (D) P-S6RP and Nephlin coimmunofluorescence staining, and quantification in glomeruli (E, F). (G) Ki-67 immunostaining and (H) quantification. (I-L) Coimmunofluorescence stainings in kidneys from 2-month-old *PIK3CA*<sup>WT</sup> and *PIK3CA*<sup>Pod-HO</sup> mice. (I) Representative coimmunofluorescence staining of GFP, Nephlin and Ki-67, (J) Representative coimmunofluorescence staining of Nephlin, PDGFR $\beta$  and Ki-67, (K) Representative coimmunofluorescence staining of CD3 and Nephlin, (L) Representative coimmunofluorescence staining of F4/80 and Nephlin. Values are means  $\pm$  SD. *P* values calculated using two-tailed Mann-Whitney U test (E, F); or two-tailed *t* test (B, H). Scale bars: 130  $\mu$ m (A upper), 32  $\mu$ m (A lower), 20  $\mu$ m (D, I-L), 32.2  $\mu$ m (G).

A

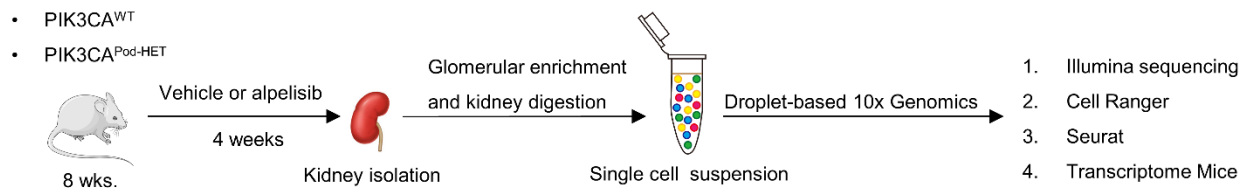

B

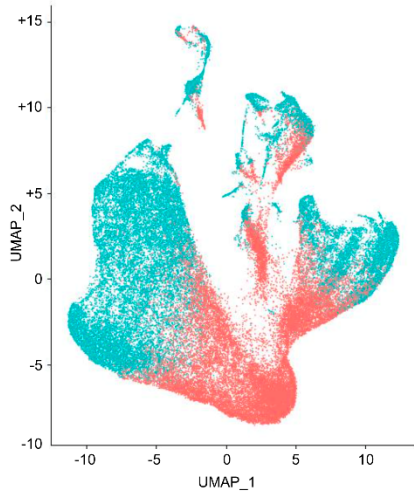

C

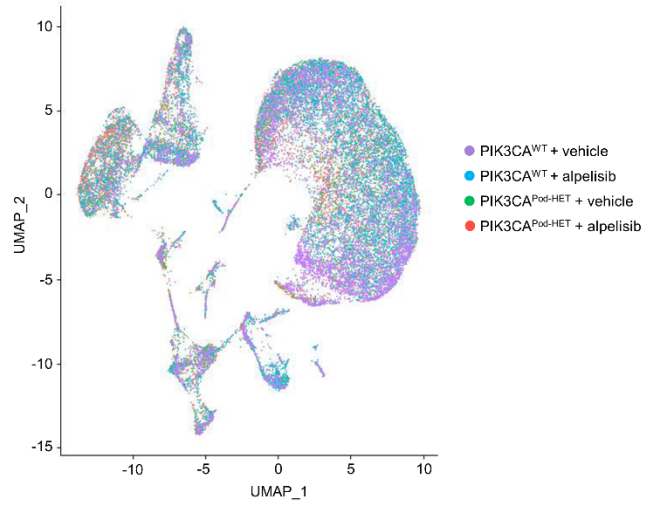

D

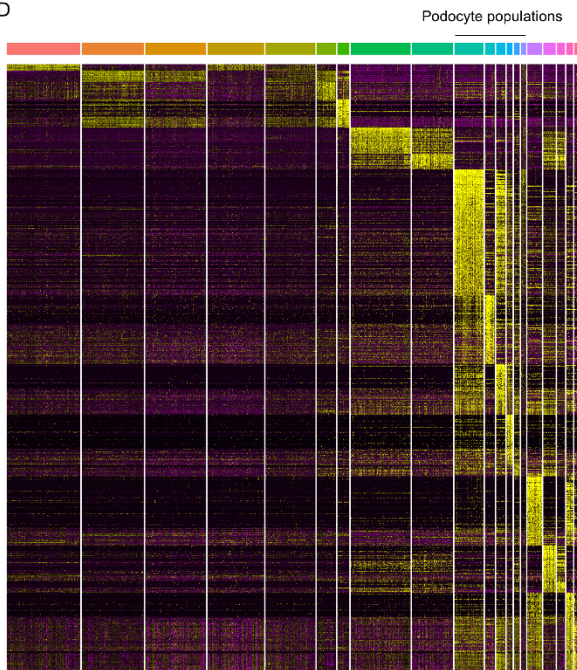

E

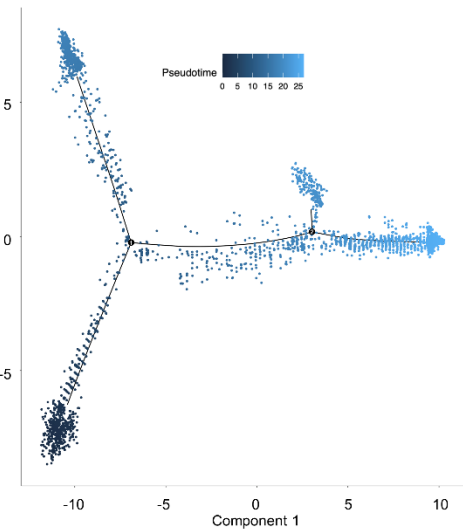

F

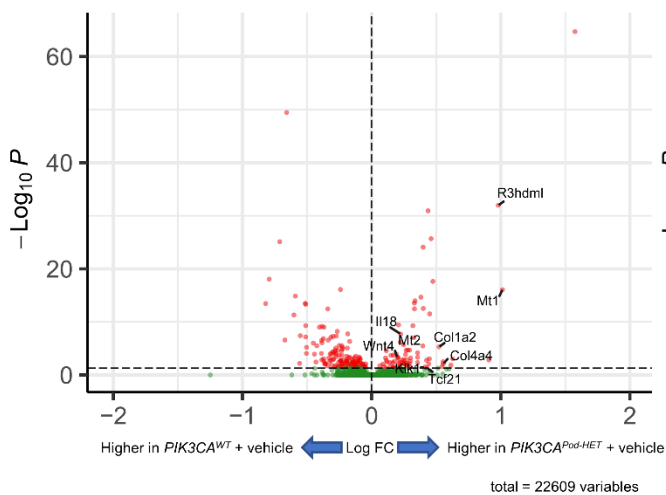

G

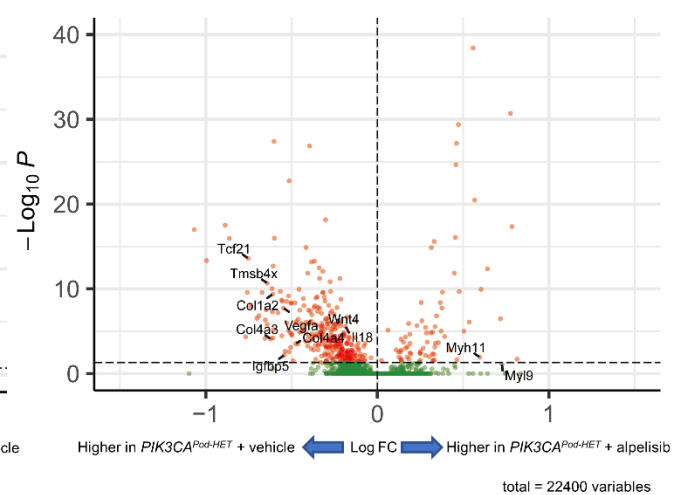

**Supplemental Figure 4: *PIK3CA* gain-of-function mutation in podocytes is associated with changes in cell fate determination.** (A) Schematic of single-cell RNA sequencing. Eight-week-old *PIK3CA<sup>WT</sup>* and *PIK3CA<sup>Pod-HET</sup>* mice were treated for 4 weeks with either the vehicle or alpelisib (n=2 mice per group). (B) UMAP plot showing all cells from glomerular enriched kidneys before filtering from 8 mice. Cells with unique molecular identifiers (UMIs) over 2000, with genes over 600, and a mitochondrial gene expression percentage (MT%) less than 60 were chosen as filtering criteria. The cells that passed this filtering criteria are colored in green (TRUE), and those did not pass the criteria are colored in red (FALSE). (C) UMAP plot showing all of the cell distributions after filtering. No batch effect was observed. (D) Heatmap of strongly expressed genes in each cluster. Each column represents a cell and each row represents a gene. The color scheme is based on the expression level of the gene. (E) Cell trajectory map of podocyte clusters (1-6) showing the pseudo-time. (F) Volcano plots showing the differentially expressed genes between two samples (*PIK3CA<sup>Pod-WT</sup>*-vehicle vs. *PIK3CA<sup>Pod-HET</sup>*-vehicle). Red dots are the genes that are differentially expressed ( $-\log_{10}$  adjusted  $p$ -value > 1.3). (G) Volcano plots showing the differentially expressed genes between two samples (*PIK3CA<sup>Pod-HET</sup>*-vehicle vs. *PIK3CA<sup>Pod-HET</sup>*-alpelisib). Red dots are the genes that are differentially expressed ( $-\log_{10}$  adjusted  $p$ -value > 1.3).



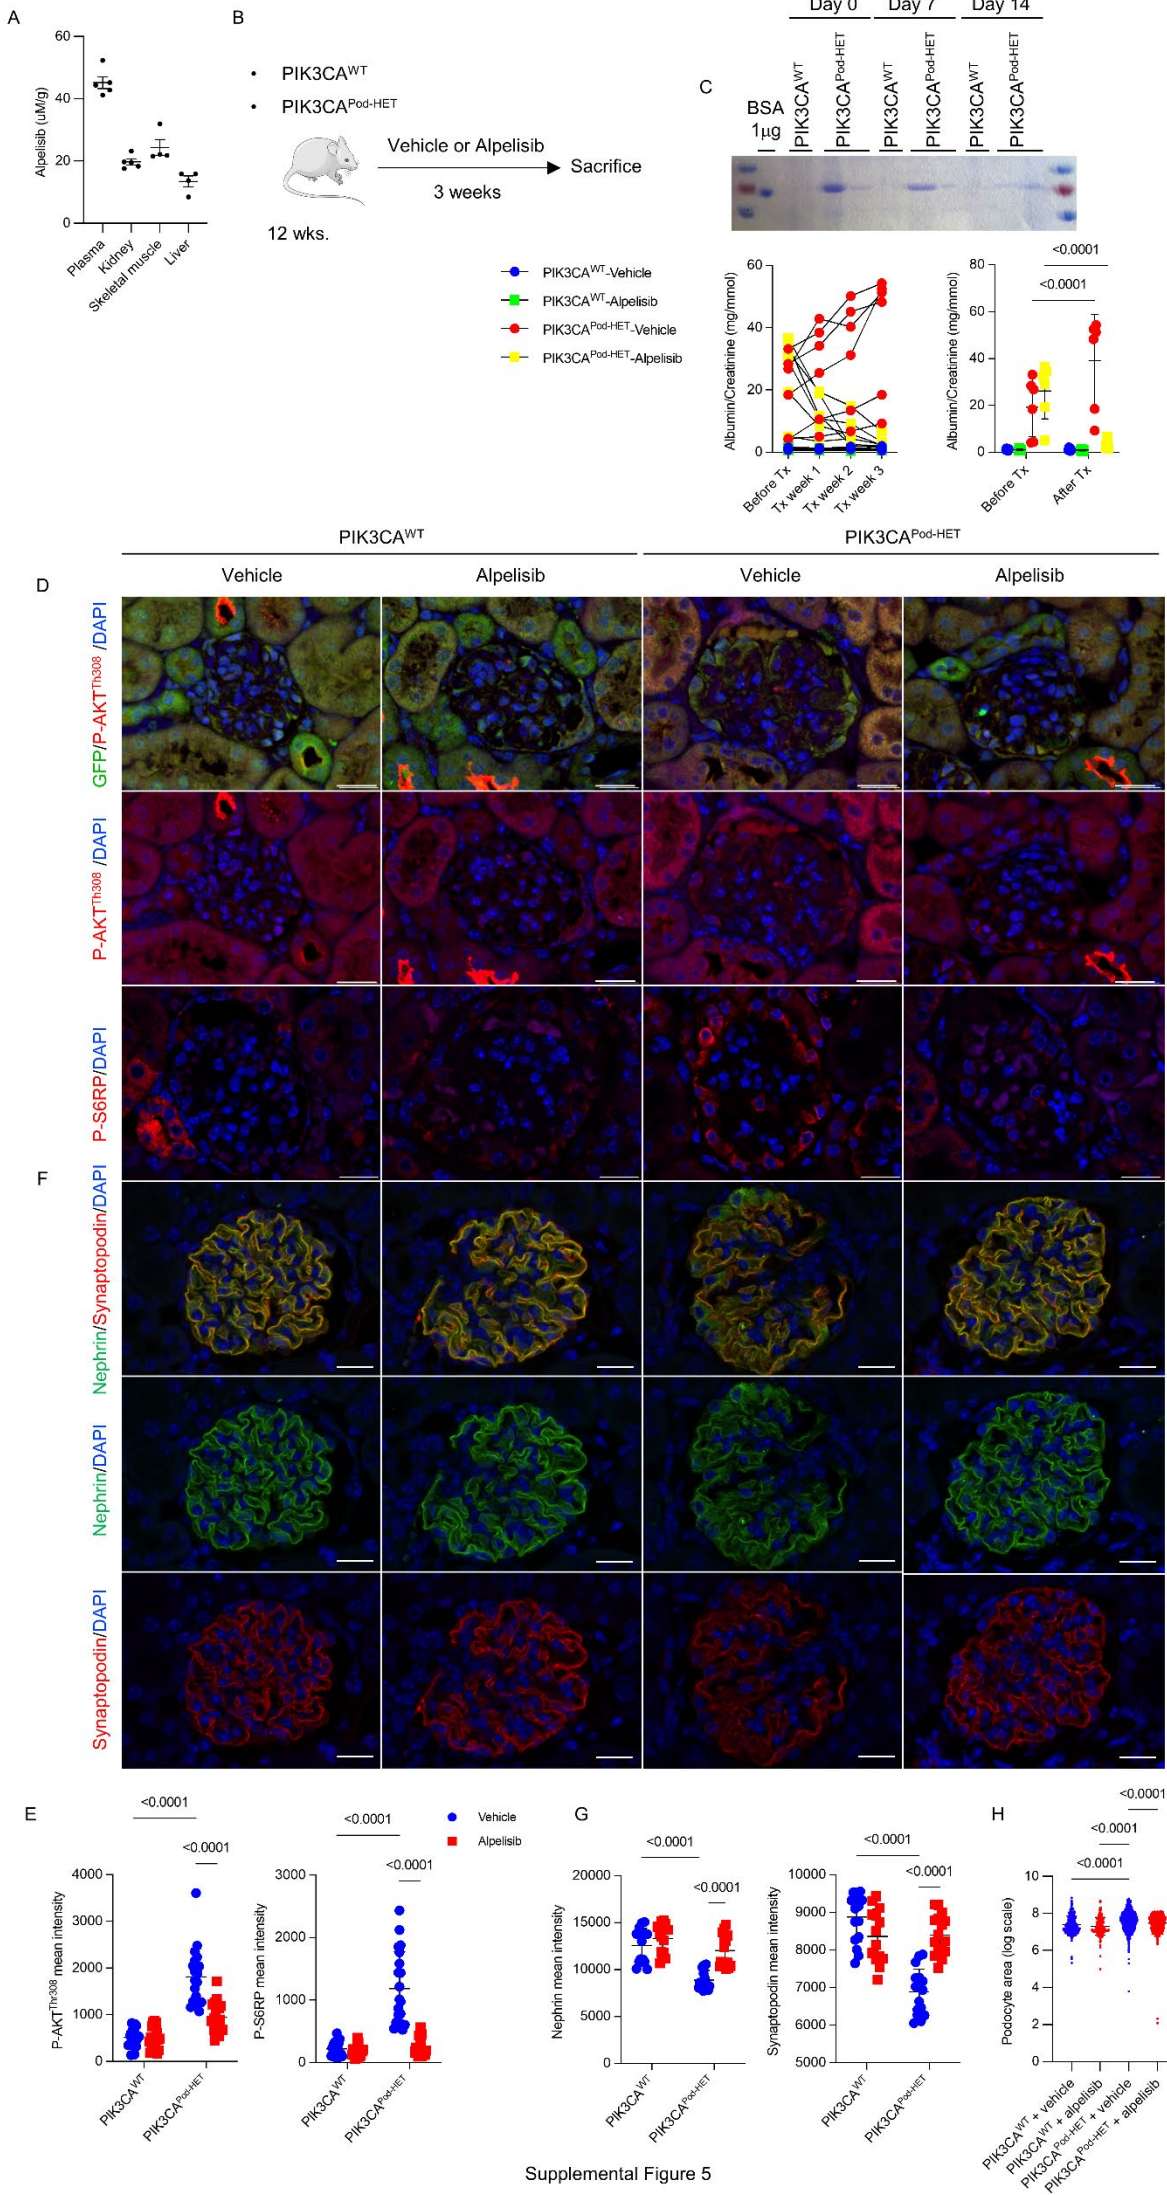

Supplemental Figure 5

**Supplemental Figure 5: *PIK3CA* gain-of-function mutation in podocytes leads to progressive glomerular disease.** (A) Alpelisib concentrations ( $\mu\text{M/g}$ ) in mice plasma, kidneys, skeletal muscle, and liver were measured by LC-MS analysis ( $n=5$  mice for plasma and kidney,  $n=4$  for skeletal muscle and liver). (B) Experimental protocol design. (C) Representative Coomassie blue staining of *PIK3CA*<sup>WT</sup> and *PIK3CA*<sup>Pod-HET</sup> mice during treatment with either the vehicle or alpelisib and below, quantification ( $n=6$  per group). Bovine serum albumin (BSA) is shown as a positive control. The trajectory of each mouse urinary albumin/creatinine is shown in the below left graph. Below right graph are means  $\pm$  SD. P values are calculated using two-way ANOVA with Tukey's post hoc test. The values for Before Tx and After Tx (= Tx week 3) are shared between the 2 graphs. (D) Upper two panels show representative coimmunofluorescence staining between GFP and P-AKT<sup>Thr308</sup> in the kidneys from *PIK3CA*<sup>WT</sup> and *PIK3CA*<sup>Pod-HET</sup> mice treated with either the vehicle or alpelisib. Note the second panel is the split channel panel of the top panel. The lowest panel shows the representative immunofluorescence staining of P-S6RP in kidneys from *PIK3CA*<sup>WT</sup> and *PIK3CA*<sup>Pod-HET</sup> mice treated with either the vehicle or alpelisib. Scale bar 20  $\mu\text{m}$ . (E) Glomerular P-AKT<sup>Thr308</sup> and P-S6RP mean intensity quantification ( $n=6$  mice per group). (F) Upper panel shows representative coimmunofluorescence staining between Nephryn and Synaptopodin in the kidneys from *PIK3CA*<sup>WT</sup> and *PIK3CA*<sup>Pod-HET</sup> mice treated with either the vehicle or alpelisib. The lowest two panels show representative immunofluorescence staining of Nephryn or Synaptopodin in kidneys from *PIK3CA*<sup>WT</sup> and *PIK3CA*<sup>Pod-HET</sup> mice treated with either the vehicle or alpelisib. The lowest two panels are split channel images of the top panel images. Scale bar 20  $\mu\text{m}$ . (G) Glomerular Nephryn and Synaptopodin mean intensity quantification ( $n= 6$  mice per group). (H) Amnis ImageStream analysis of isolated podocytes of *PIK3CA*<sup>WT</sup> and *PIK3CA*<sup>Pod-HET</sup> mice treated with either the vehicle or alpelisib ( $n=3$  mice per group). Data are represented as means  $\pm$  SD. P values calculated using two-way ANOVA with Bonferroni's post hoc test (C right), and two-way ANOVA with Tukey's post hoc test (E, G, and H).



Albuminuria prior to alpelisib introduction

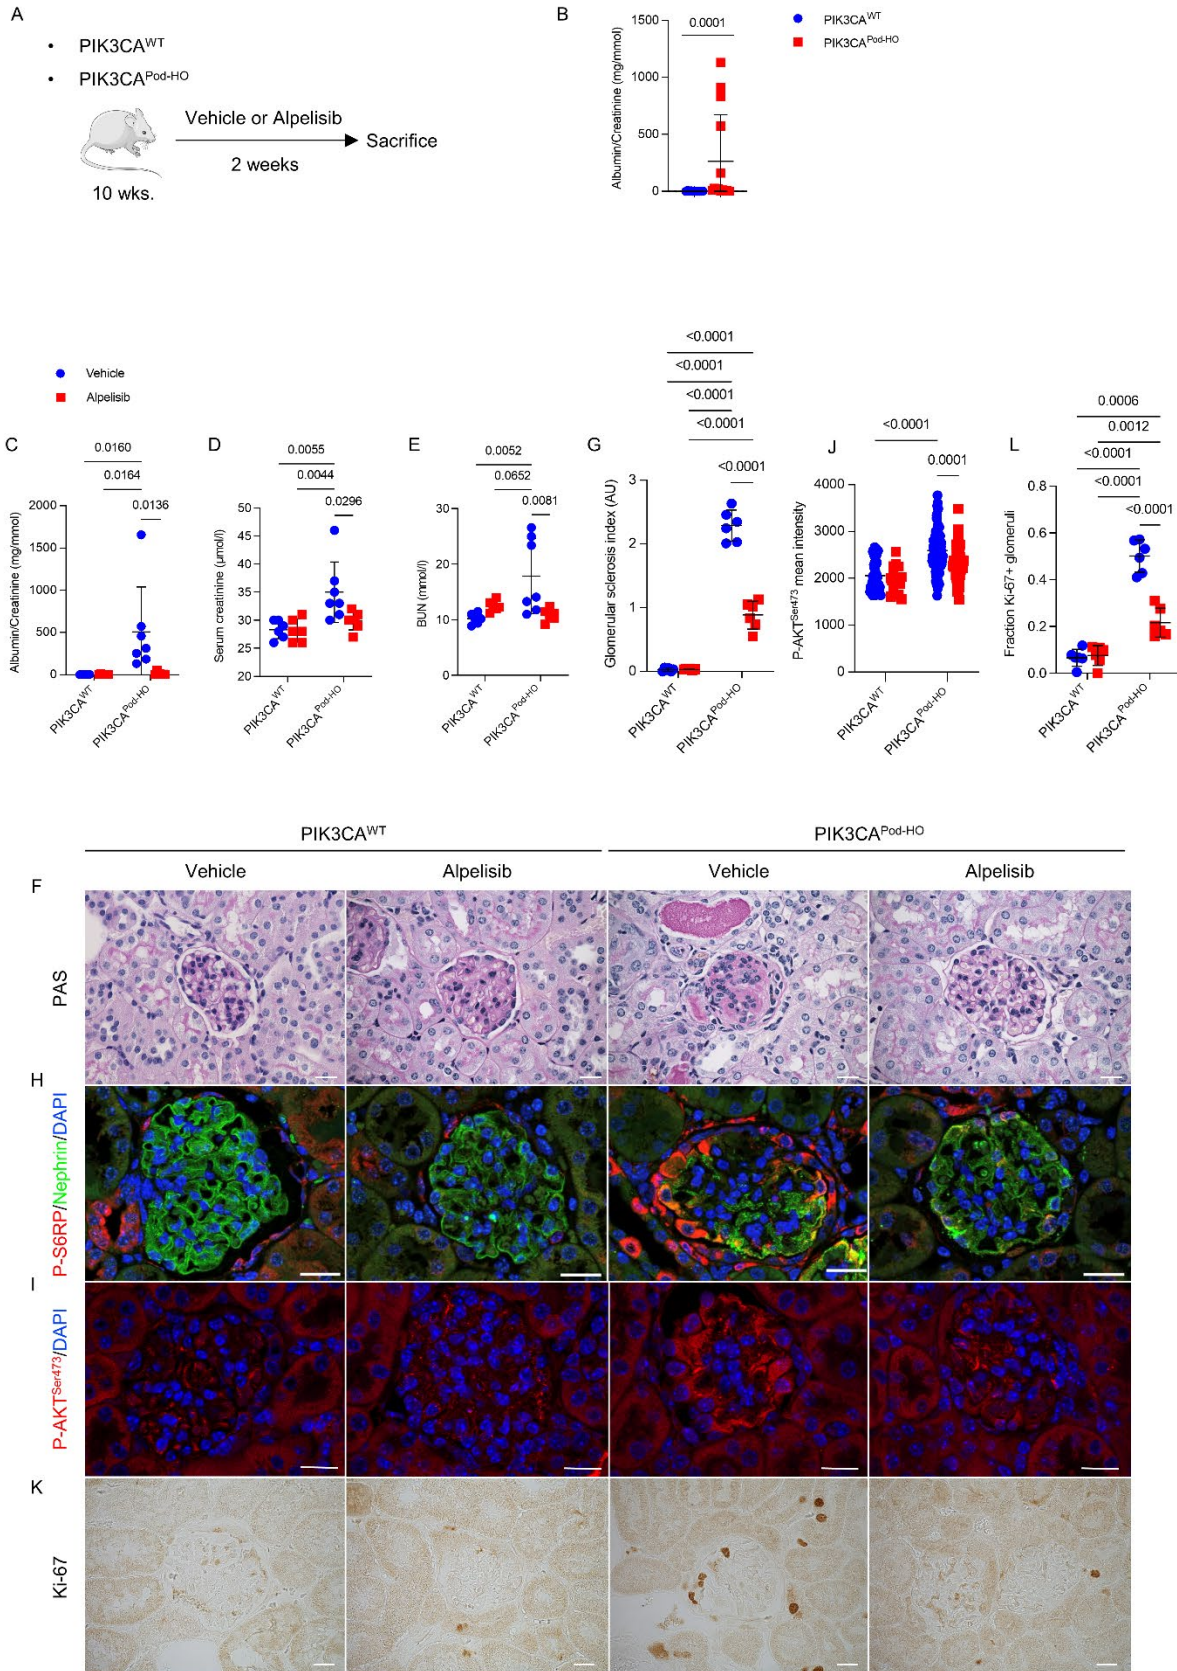

Supplemental Figure 6

**Supplemental Figure 6: Allele dose effect of  $PIK3CA$  gain-of-function mutation in podocytes and sensitivity to alpelisib.** (A) Design of the experimental protocol. (B) Urinary albumin to creatinine ratio of  $PIK3CA^{WT}$  and  $PIK3CA^{Pod-HO}$  mice before the start of treatment. (n=11 for  $PIK3CA^{WT}$ , n=14 for  $PIK3CA^{Pod-HO}$  mice). C-L are of  $PIK3CA^{WT}$  and  $PIK3CA^{Pod-HO}$  mice at the time of sacrifice (2 weeks after treatment with either the vehicle or alpelisib) (n=6 for  $PIK3CA^{WT}$ -Vehicle and  $PIK3CA^{WT}$ -Alpelisib, n=7 for  $PIK3CA^{HO}$ -Vehicle and  $PIK3CA^{HO}$ -Alpelisib, except otherwise stated). (C) Urinary albumin to creatinine ratio, (D) Serum creatinine, (E) BUN, (F) Representative PAS staining of kidneys (Scale



bar 32.2  $\mu\text{m}$ ), **(G)** GS index quantification (n=6 per group) **(H)** Representative coimmunofluorescence staining between P-S6RP and Nephlin in kidneys (Scale bar 20  $\mu\text{m}$ ), **(I)** Representative P-AKT<sup>Ser473</sup> immunofluorescence staining in kidneys (Scale bar 20  $\mu\text{m}$ ). **(J)** Quantification of mean P-AKT<sup>Ser473</sup> intensity in glomeruli, **(K)** Representative Ki-67 immunostaining (Scale bar 32.2  $\mu\text{m}$ ), **(L)** Quantification of Ki-67+ fraction (n=6 per group). Values are the means  $\pm$  SD and representative of 3 independent experiments **(B, C, D, E, G, J, and L)**. P values calculated using two-way ANOVA with Tukey's post hoc test **(C, D, E, G, J, and L)**; two-tailed Mann-Whitney U test **(B)**.

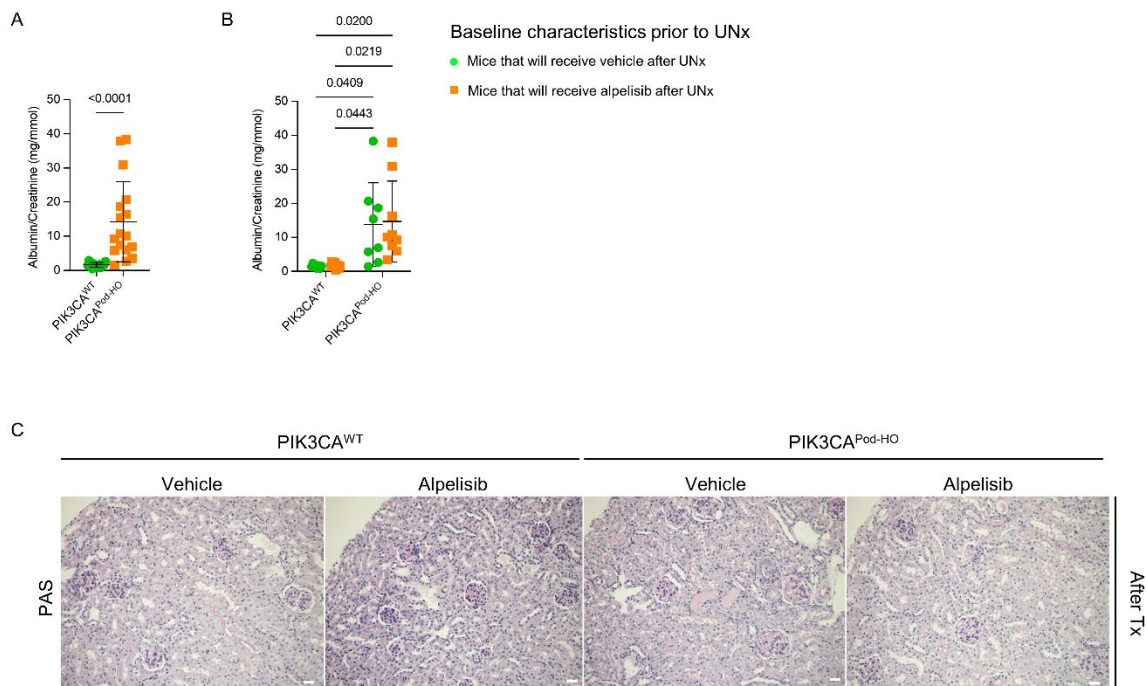

Supplemental Figure 7

**Supplemental Figure 7: Alpelisib improves kidney lesions in uninephrectomized *PIK3CA<sup>Pod-HO</sup>* mice.** UNx: Uninephrectomy. **(A)** Urinary albumin/creatinine of *PIK3CA<sup>WT</sup>* (n=16) and *PIK3CA<sup>Pod-HO</sup>* (n=17) mice prior to UNx. **(B)** Urinary albumin/creatinine of *PIK3CA<sup>WT</sup>* and *PIK3CA<sup>Pod-HO</sup>* mice prior to UNx that will be treated with either vehicle or alpelisib. n=8 for *PIK3CA<sup>WT</sup>*-Vehicle, *PIK3CA<sup>WT</sup>*-Alpelisib, *PIK3CA<sup>HO</sup>*-Vehicle, and n=9 for *PIK3CA<sup>HO</sup>*-Alpelisib. **(C)** PAS staining of kidneys from *PIK3CA<sup>WT</sup>* and *PIK3CA<sup>Pod-HO</sup>* mice at sacrifice. Data are represented as means  $\pm$  SD from 3 independent experiments for **(A)** and **(B)**. P values are calculated using two-tailed Mann-Whitney U test **(A)**, two-way ANOVA with Tukey's post hoc test **(B)**. Scale bars: 32.2  $\mu$ m **(C)**. Some data are identical between **(A)**, **(B)** and Figure 4L.

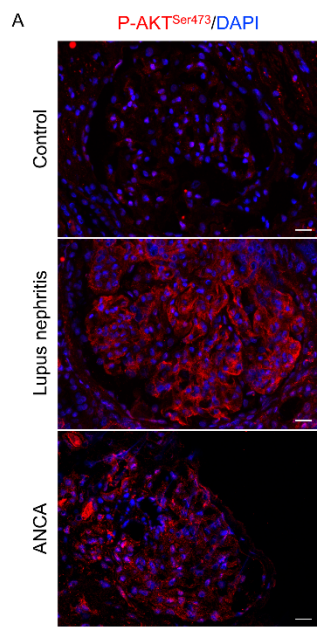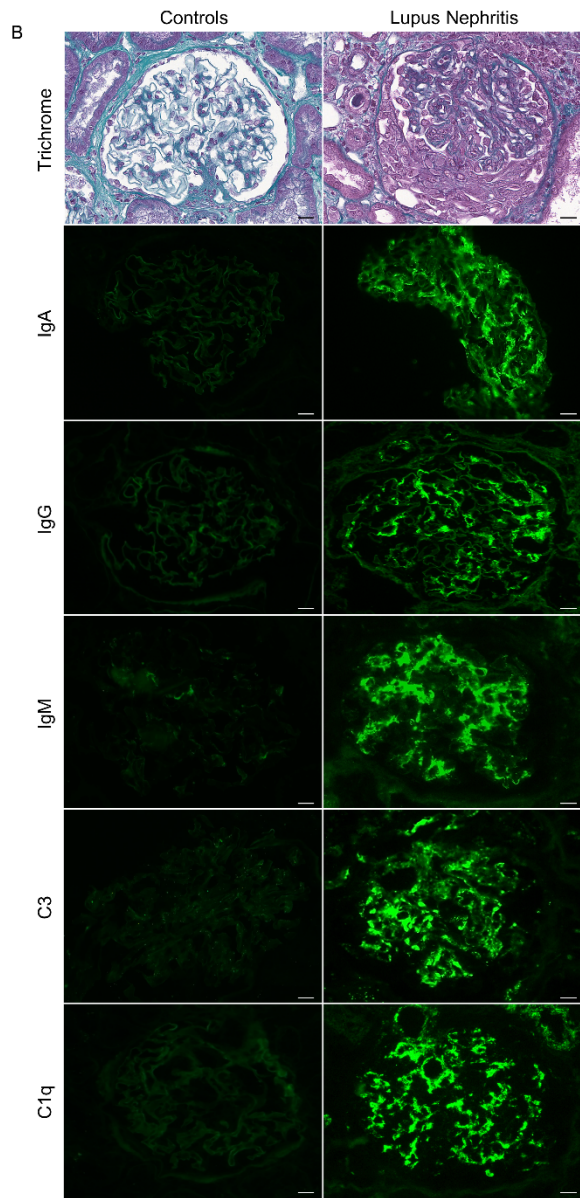

**C**

| Slide   | ROI No.    | Glom. ROI No. | Reference No. | Age (yrs.) | Sex             | Morphology      | Lupus classification (2003) | Chronicity (%) | NIH classification activity | NIH classification chronicity | GS   | IFTA (%) | Crescent lesion (n) | Crescent lesion (%) | IF         |
|---------|------------|---------------|---------------|------------|-----------------|-----------------|-----------------------------|----------------|-----------------------------|-------------------------------|------|----------|---------------------|---------------------|------------|
| Slide A | Control A2 | 1-2           | 21NA01839     | 19         | M               | Normal          |                             |                |                             |                               | 0    | 0        | 0                   | 0                   | Neg        |
|         | Control A1 | 3-6           | 21NA05988     | 36         | F               | Normal          |                             |                |                             |                               | 0    | 0        | 0                   | 0                   | Neg        |
| Slide B | LN A2      | 15-23         | 19NA08977     | 21         | M               | Lupus Nephritis | 4                           | 6              | 12/24                       | 1/12                          | 0/15 | 5        | 7/15                | 47%                 | Full house |
|         | LN A1      | 7-14          | 19NA00135     | 18         | F               | Lupus Nephritis | 4                           | 22             | 14/24                       | 4/12                          | 2/30 | 15       | 15/30               | 50%                 | Full house |
|         | LN B2      | 18-26         | 21NA03559     | 33         | F               | Lupus Nephritis | 4                           | 0              | 15/24                       | 0/12                          | 0/21 | 0        | 12/21               | 57%                 | Full house |
|         | Control B2 | 1-4           | 21NA03758     | 25         | F               | Normal          |                             |                |                             |                               | 0    | 0        | 0                   | 0                   | Neg        |
|         | Control B1 | 5-10          | 21NA02670     | 32         | F               | Normal          |                             |                |                             |                               | 0    | 0        | 0                   | 0                   | Neg        |
| LN B1   | 11-17      | 22NA00744     | 41            | F          | Lupus Nephritis | 4               | 0                           | 14/24          | 0/12                        | 0/19                          | 0    | 17/19    | 89%                 | Full house          |            |

GS: Glomerulosclerosis over the total number of glomeruli; IFTA: Interstitial fibrosis and tubular atrophy; IF: Immunofluorescence.

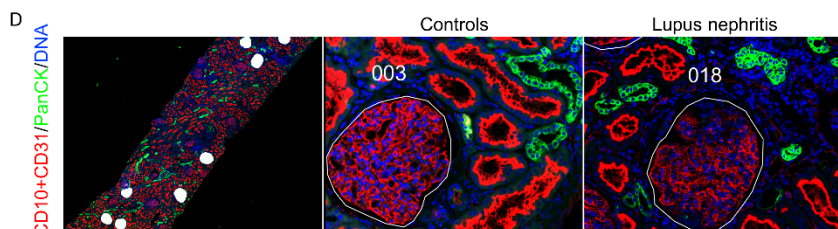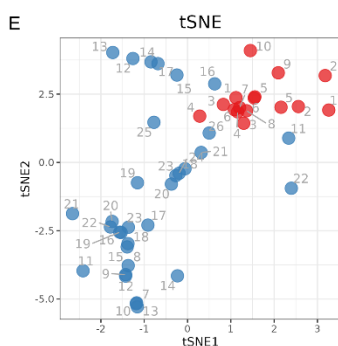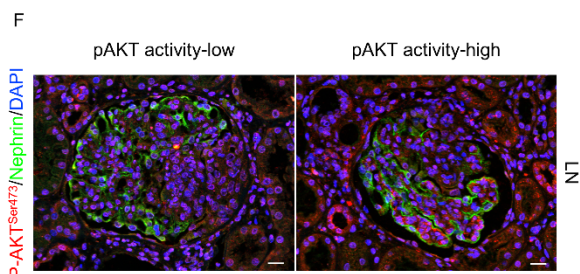

Supplemental Figure 8

**Supplemental Figure 8: Human kidney biopsies used for glomerular spatial transcriptomics.** (A) Representative immunofluorescence staining of P-AKT<sup>Ser473</sup> (frozen section) in kidney biopsies from patients with lupus nephritis (LN), ANCA vasculitis or controls (n=4 patients per group). Note the images are the split channel images of Figure 4A. (B) Representative kidney staining (Trichrome staining and immunofluorescence of IgA, IgG, IgM, C3, and C1q) for controls and LN patients. (C) Patient biopsy information and NIH classification for LN to demonstrate the activity of the disease. A total of 49 ROI distributions among each sample are shown. (D) Schematic of the spatial transcriptomics workflow. Two slides were analyzed. On each slide (slide A and B), 2 LN kidney biopsies and 2 control kidney biopsies were assigned to avoid batch effects between the slides. CD10 + CD31, PanCK, and DNA were used to visualize the kidney structure to enable selection of the region of interest (ROI). Representative ROIs for controls and LN are shown. (E) T-distributed neighbor embedding (t-SNE) plot showing the distribution of LN (in blue) and controls (in red) glomeruli. (F) Representative Nephryn/P-AKT<sup>Ser473</sup> immunofluorescence staining for LN kidneys. With mean intensity quantification, the LN ROIs were classified either as pAKT activity-low or pAKT activity-high. Scaler bars: 20  $\mu$ m (A, B, F).

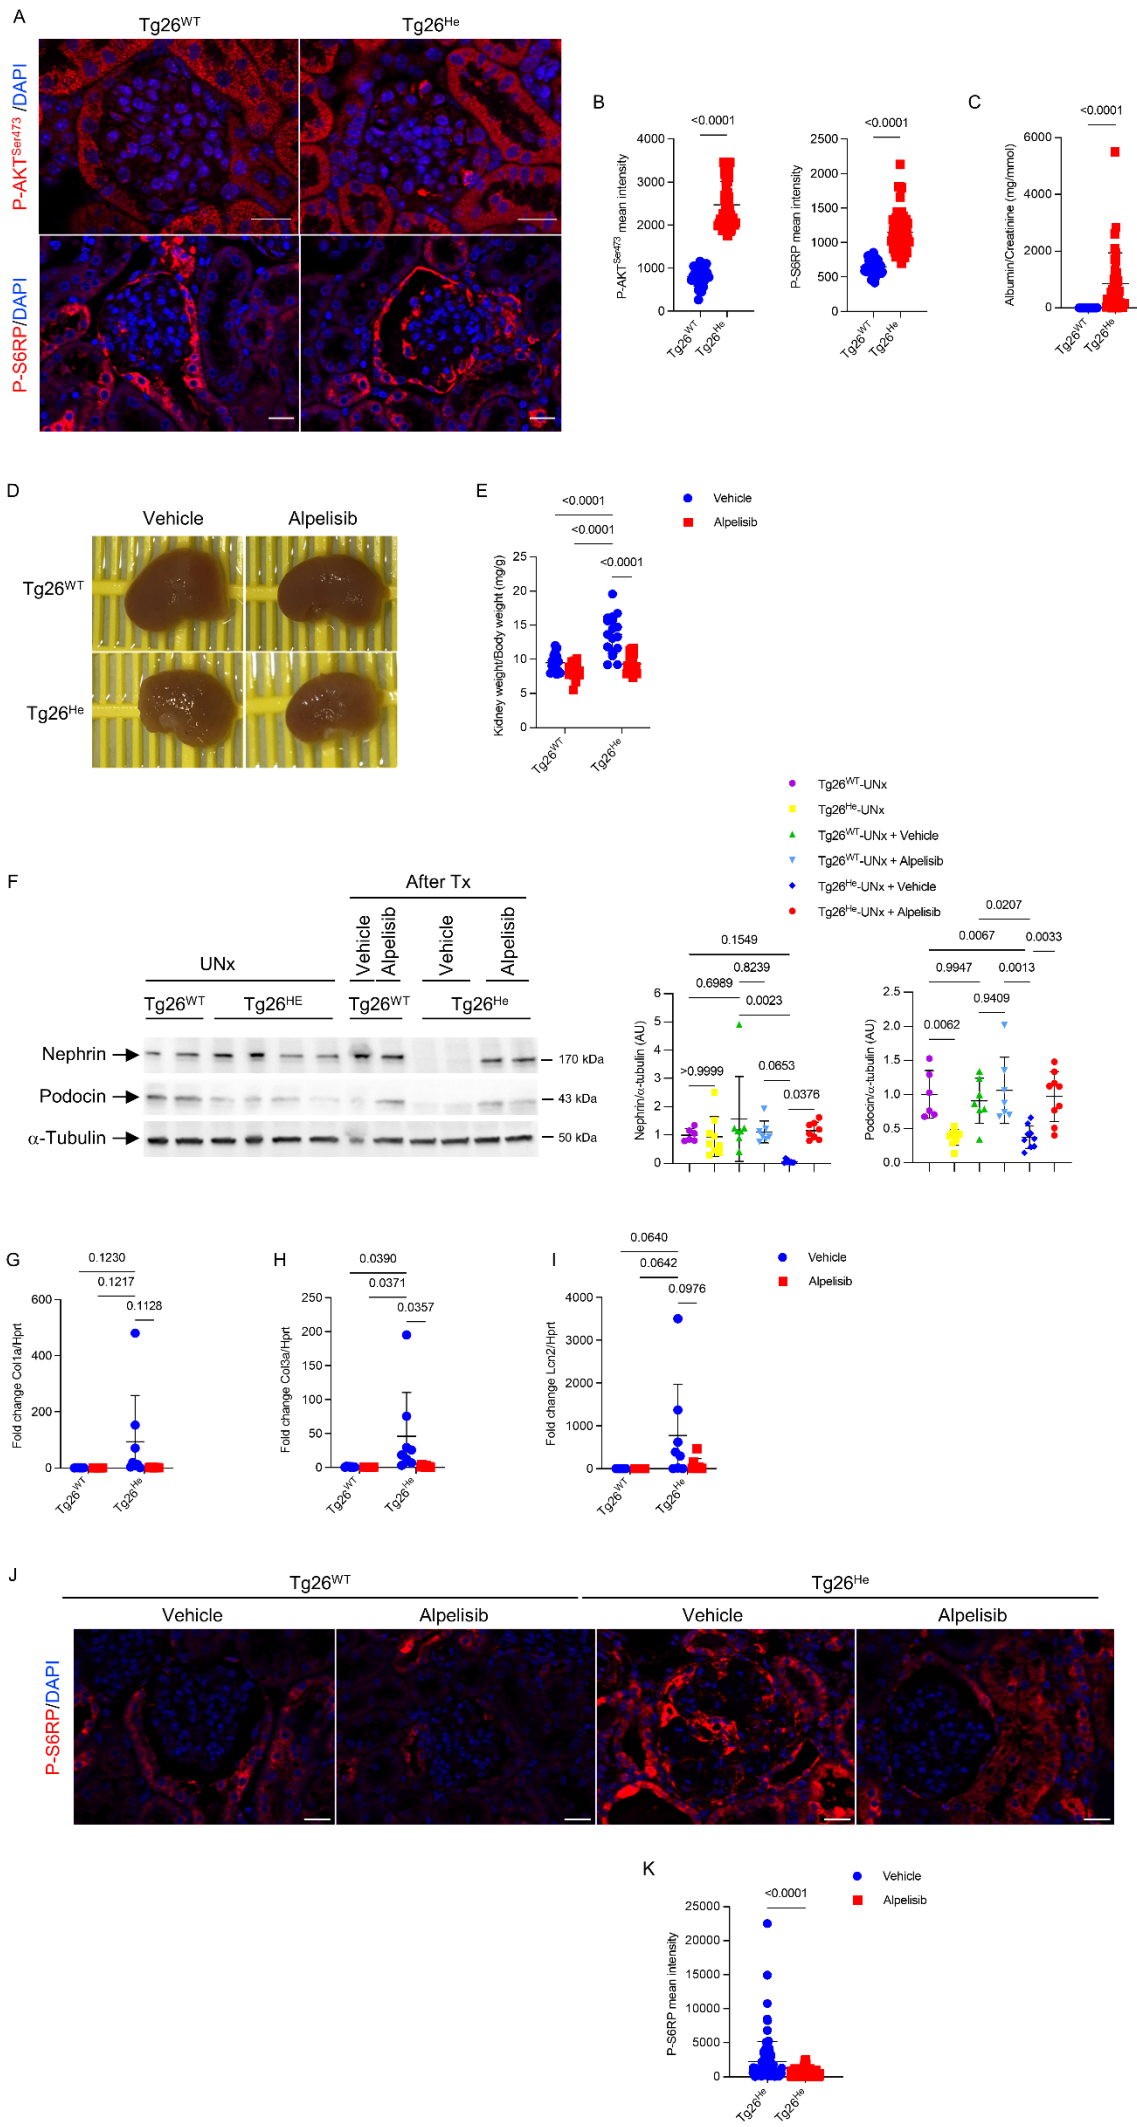

Supplemental Figure 9

**Supplemental Figure 9: Alpelisib improves kidney lesions in a mouse model of collapsing glomerulopathy. (A)** Representative P-AKT<sup>Ser473</sup> and P-S6RP immunofluorescence staining in kidneys from 4-week-old *Tg26<sup>WT</sup>* and *Tg26<sup>He</sup>* mice. Scale bar 20  $\mu$ m. **(B)** Quantification of mean P-AKT<sup>Ser473</sup> intensity and P-S6RP mean intensity of glomeruli from 4-week-old *Tg26<sup>WT</sup>* and *Tg26<sup>He</sup>* mice. (n=6 mice per group). **(C)** Urinary albumin to creatinine ratio of 4-week-old *Tg26<sup>WT</sup>* and *Tg26<sup>He</sup>* mice before UNx (n= 31 for *Tg26<sup>WT</sup>*, and n= 37 for *Tg26<sup>He</sup>* mice). Note that this data is identical to the before-UNx data in Figure 5Q. **(D)** Representative kidney photos of the *Tg26<sup>WT</sup>* and *Tg26<sup>He</sup>* mice at the time of sacrifice (4 weeks following UNx and treated either with vehicle or alpelisib). **(E)** kidney-to-body weight ratio of *Tg26<sup>WT</sup>* and *Tg26<sup>He</sup>* mice at the time of sacrifice (n= 16 for *Tg26<sup>WT</sup>*-Vehicle, n= 15 for *Tg26<sup>WT</sup>*-Alpelisib, n=18 for *Tg26<sup>He</sup>*-Vehicle, n=19 for *Tg26<sup>He</sup>*-Alpelisib). **(F)** Western blot and quantification of Nephryn, Podocin, and  $\alpha$ -tubulin in kidney cortex from *Tg26<sup>WT</sup>* and *Tg26<sup>He</sup>* mice either at UNx or at sacrifice (n=6 for *Tg26<sup>WT</sup>* UNx kidney, n=9 for *Tg26<sup>He</sup>* UNx kidney, n=7 for *Tg26<sup>WT</sup>*-Vehicle and *Tg26<sup>WT</sup>*-Alpelisib, n=8 for *Tg26<sup>He</sup>*-Vehicle and *Tg26<sup>He</sup>*-Alpelisib). **(G)** *Col1a*, **(H)** *Col3a*, and **(I)** *Lcn2* quantification of qRT-PCR analysis in kidney cortex from *Tg26<sup>WT</sup>* and *Tg26<sup>He</sup>* mice at sacrifice (n=8 for *Tg26<sup>WT</sup>*-Vehicle, *Tg26<sup>WT</sup>*-Alpelisib, *Tg26<sup>He</sup>*-Vehicle, and n=9 for *Tg26<sup>He</sup>*-Alpelisib). **(J)** Representative P-S6RP immunofluorescence and their glomerular quantification **(K)** from *Tg26<sup>WT</sup>* and *Tg26<sup>He</sup>* mice kidney at sacrifice (n= 6 mice per group). Data are represented as means  $\pm$  SD are from 6 independent experiments **(E)**, or are means  $\pm$  SD and representative of 3 independent experiments **(B, C, F-K)**. P values calculated using two-tailed Mann-Whitney U test **(B, C, and K)**, two-way ANOVA with Tukey's post hoc test **(E, G-I)**; one-way ANOVA with Tukey's post hoc test **(F)**.



● Mice (24 wks) that will receive vehicle after UNx  
 ■ Mice (24 wks) that will receive alpelisib after UNx

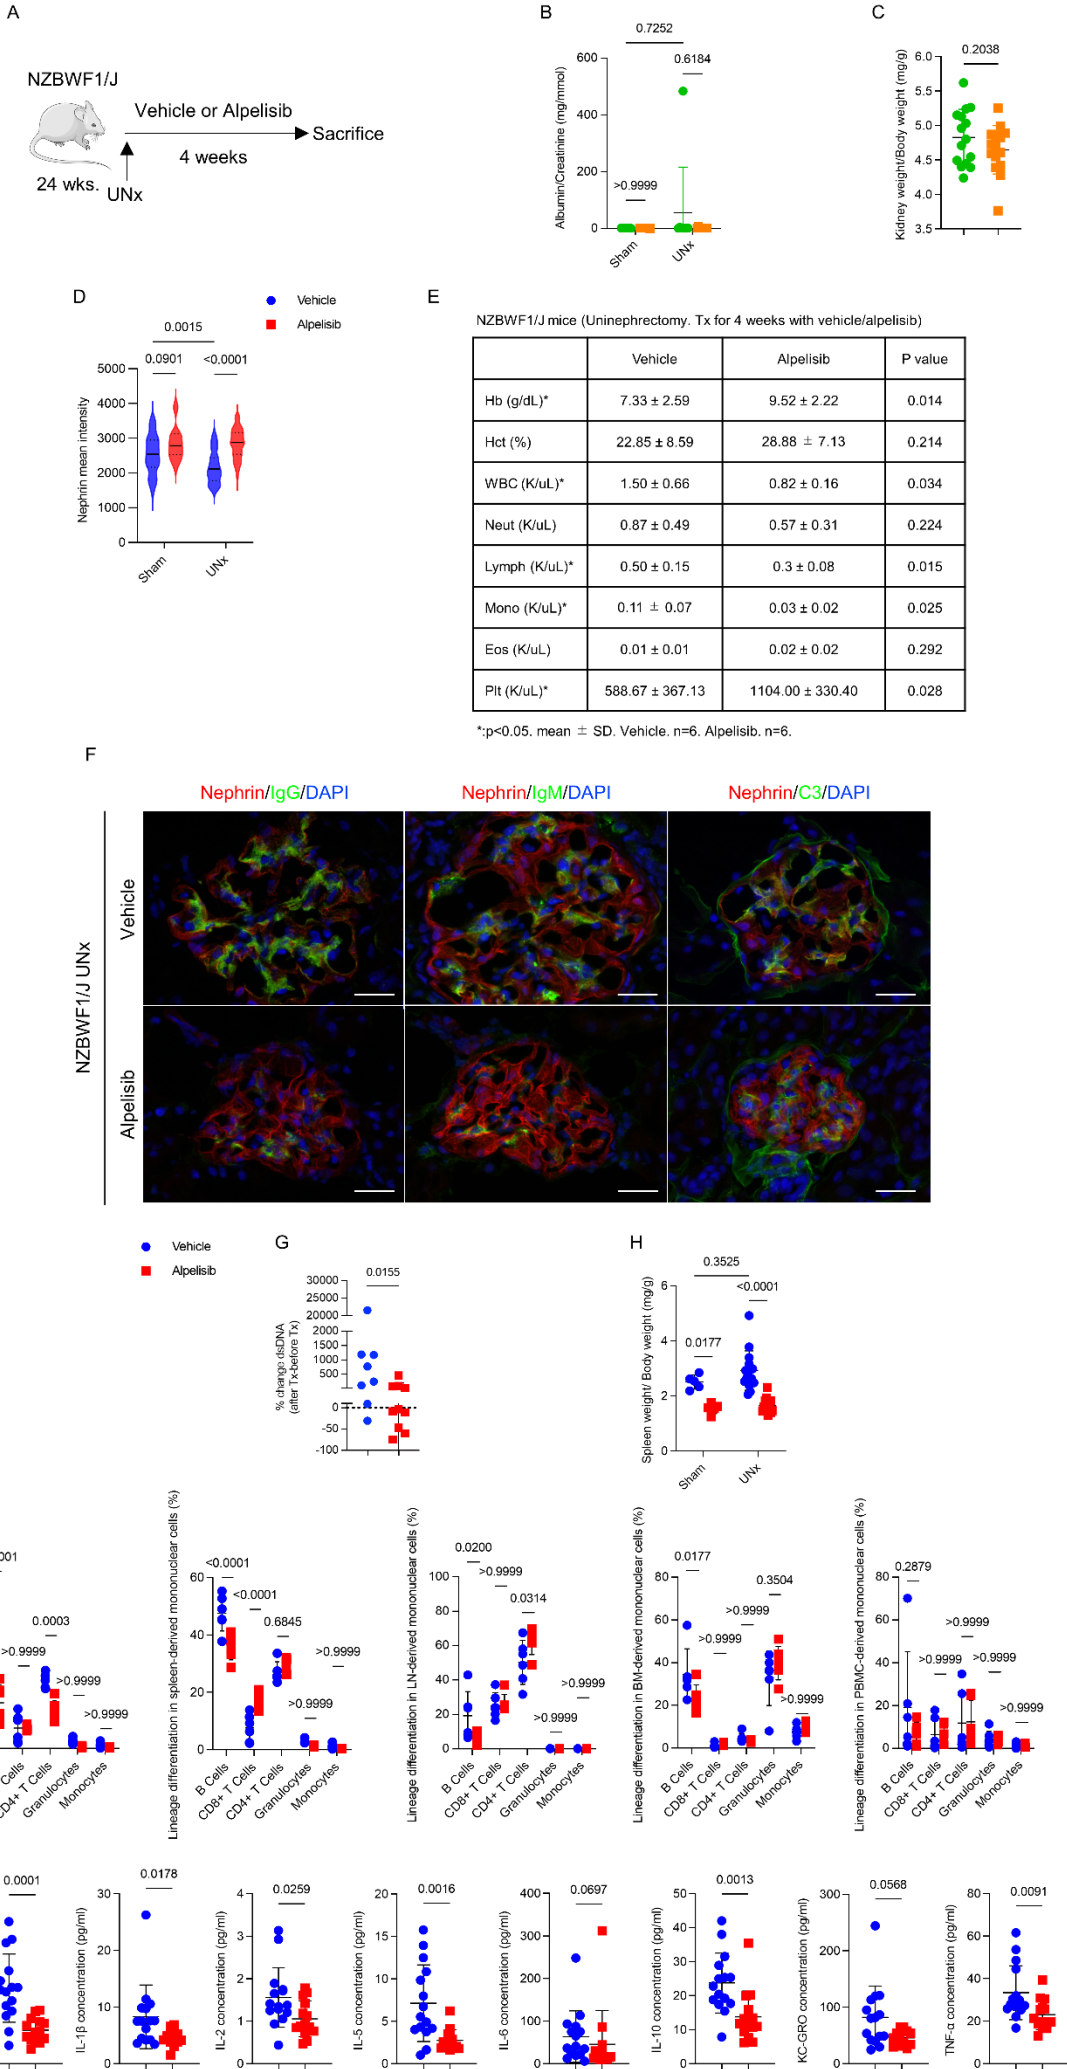

Supplemental Figure 10

**Supplemental Figure 10: Alpelisib improves kidney lesions in *NZBWF1/J* Lupus Nephritis models.** (A) Design of the experimental protocol. (B) Urinary albumin to creatinine ratio. (n= 5 for *NZBWF1/J*-Sham-Vehicle and *NZBWF1/J*-Sham-Alpelisib, n= 9 for *NZBWF1/J*-UNx-Vehicle and *NZBWF1/J*-UNx-Alpelisib mice). (C) Kidney-to-body weight ratio of *NZBWF1/J* mice UNx kidney (n=15 per group). **D-J** are of *NZBWF1/J* mice at the time of sacrifice (4 weeks after either sham operation or UNx followed by treatment with either the vehicle or alpelisib). (D) Nephryn mean intensity quantification of glomeruli at sacrifice (n= 6 mice per group). Related to Figure 7F. (E) Peripheral blood counts at sacrifice (n= 6 mice per group). (F) Representative IgG/Nephrin, IgM/Nephrin, and C3/Nephrin coimmunofluorescence staining at sacrifice (n=6 mice per group). Scale bar 20  $\mu$ m. (G) dsDNA titer change ratio in the serum (after treatment at sacrifice to before UNx) of *NZBWF1/J* mice treated with either the vehicle or alpelisib (n=8 for *NZBWF1/J*-UNx-Vehicle, n=10 for *NZBWF1/J*-UNx-Alpelisib). (H) Spleen to body weight ratio at sacrifice (n=5 for *NZBWF1/J*-Sham-Vehicle and *NZBWF1/J*-Sham-Alpelisib, n=15 for *NZBWF1/J*-UNx-Vehicle and *NZBWF1/J*-UNx-Alpelisib mice). (I) Percentage of peripheral blood mononuclear cell (PBMCs), spleen, lymph nodes, and bone marrow cell population at sacrifice determined by flow cytometry analysis (n=6 per group). CD4, CD8, B220, Mac1, and Gr1 are used as lineage markers. For the spleen, the absolute cell numbers are also shown. (J) Serum cytokines at sacrifice (IFN- $\gamma$ , IL-1 $\beta$ , IL-2, IL-5, IL-6, IL-10, KC-GRO, and TNF- $\alpha$ ) measurements (n=16 mice for *NZBWF1/J*-UNx-Vehicle, n=15 mice for *NZBWF1/J*-UNx-Alpelisib). Values are the means  $\pm$  SD and representative of 3 independent experiments (**B**, **C**, **D**, **G**, **H**, **I**, and **J**). P values calculated using two-way ANOVA with Tukey's post hoc test (**B**, **D**, and **H**); two-way ANOVA with Bonferroni's post hoc test (**I**), two-tailed *t* test (**C**, **E**), and two-tailed Mann-Whitney U test (**G** and **J**).



A

FVB/NJ mice (Tx for 4 weeks with vehicle/alpelisib)

|              | Vehicle       | Alpelisib    | P value |
|--------------|---------------|--------------|---------|
| Hb (g/dL)    | 11.32 ± 4.77  | 13.77 ± 2.33 | 0.2935  |
| Hct (%)      | 37.26 ± 17.62 | 47.03 ± 8.18 | 0.2536  |
| WBC (K/uL)   | 3.98 ± 1.87   | 4.66 ± 2.05  | 0.5861  |
| Neut (K/uL)  | 0.74 ± 0.39   | 1.25 ± 0.91  | 0.2764  |
| Lymph (K/uL) | 3.17 ± 1.55   | 3.31 ± 1.43  | 0.8793  |
| Mono (K/uL)  | 0.02 ± 0.02   | 0.04 ± 0.03  | 0.5213  |
| Eos (K/uL)   | 0.04 ± 0.03   | 0.07 ± 0.03  | 0.2594  |
| Plt (K/uL)   | 1106 ± 545    | 1116 ± 174   | 0.9681  |

mean ± SD. Vehicle, n=5. Alpelisib, n=6.

B

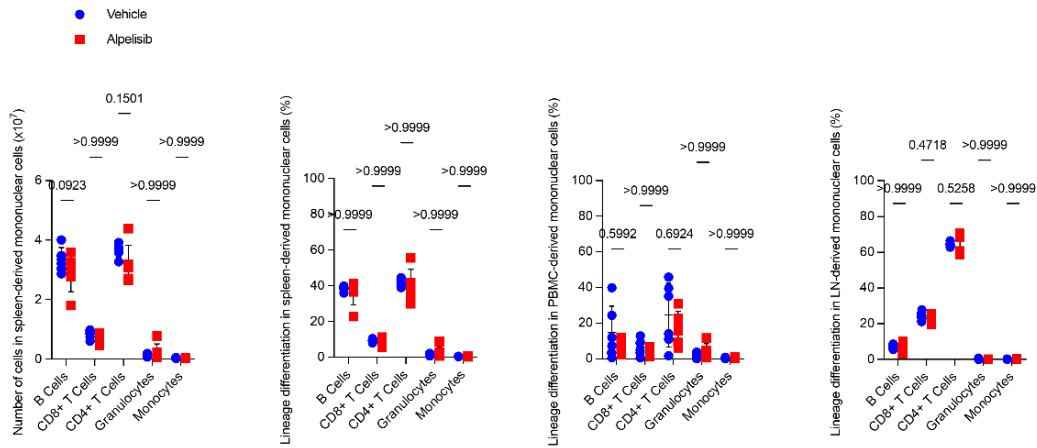

Supplemental Figure 11

**Supplemental Figure 11: Alpelisib does not affect the lymphocyte population in wild-type mice.** (A) Peripheral blood counts of FVB/N wild-type mice treated with either the vehicle or alpelisib for 4 weeks (n=5 mice for vehicle and n=6 mice for alpelisib). (B) Percentage of spleen, peripheral blood mononuclear cell (PBMCs), and lymph node cell population determined by flow cytometry analysis in FVB/N mice at the time of sacrifice and 4 weeks after treatment with either the vehicle or alpelisib (n=6 mice per group). For the spleen, the absolute cell numbers are also shown. CD4, CD8, B220, Mac1, Gr1 are used as lineage markers. Values are the means ± SD. P values calculated using two-tailed *t* test (A), and two-way ANOVA with Bonferroni's post hoc test (B).

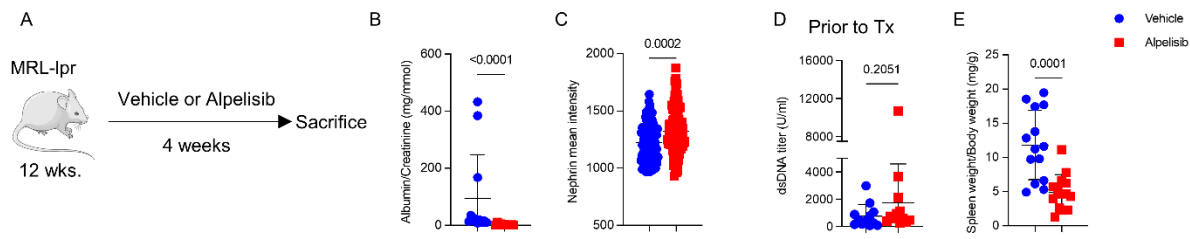

**F**

|               | Vehicle         | Alpelisib       | P value |
|---------------|-----------------|-----------------|---------|
| Hb (g/dL)*    | 12.05 ± 1.85    | 14.39 ± 1.78    | 0.017   |
| Hct (%)       | 38.44 ± 7.26    | 44.98 ± 6.28    | 0.064   |
| WBC (K/uL)*   | 7.16 ± 5.02     | 2.55 ± 1.58     | 0.016   |
| Neut (K/uL)   | 1.74 ± 1.16     | 1.46 ± 1.20     | 0.556   |
| Lymph (K/uL)* | 4.7 ± 3.59      | 0.66 ± 0.39     | 0.004   |
| Mono (K/uL)   | 0.53 ± 0.50     | 0.23 ± 0.30     | 0.162   |
| Eos (K/uL)    | 0.17 ± 0.15     | 0.07 ± 0.07     | 0.072   |
| Plt (K/uL)*   | 607.75 ± 164.56 | 911.44 ± 222.06 | 0.006   |

MRL/Lpr mice (Tx for 4 weeks with vehicle/alpelisib). \*p<0.05. mean ± SD. Vehicle. n=8. Alpelisib. n=9.

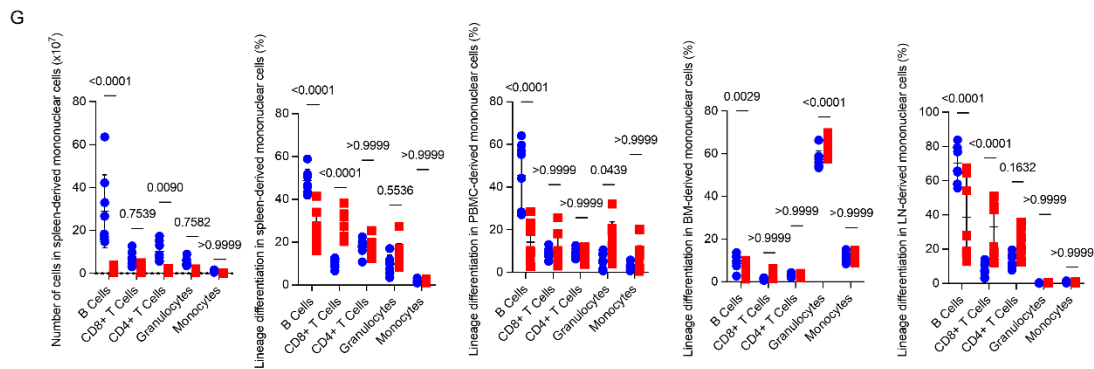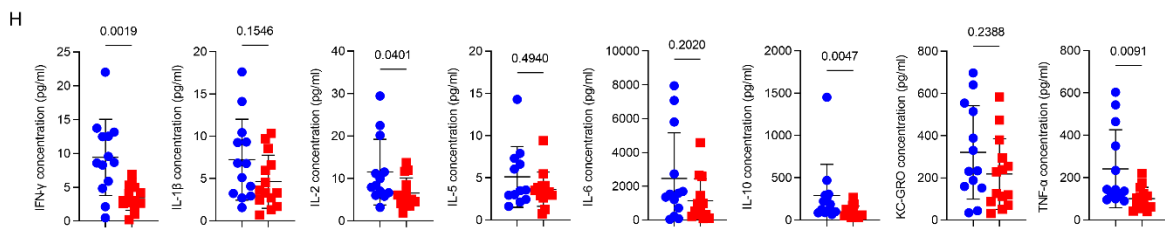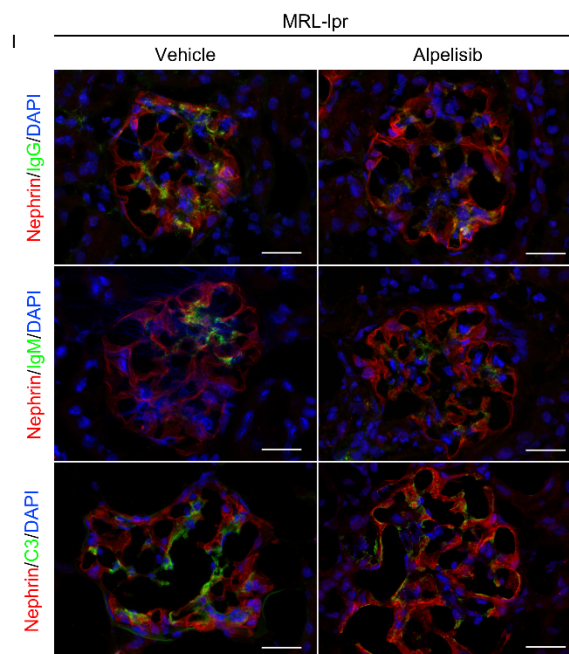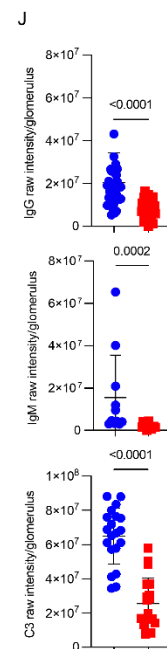

**Supplemental Figure 12: Alpelisib improves kidney lesions in *MRL-lpr* mice.** (A) Design of the experimental protocol. **B-C**, and **E-J** are of *MRL-lpr* mice at the time of sacrifice (4 weeks after treatment with either the vehicle or alpelisib). (B) Urinary albumin to creatinine ratio at sacrifice (n=12 mice per group). (C) Nephryn mean intensity quantification from the kidney glomeruli at sacrifice (n=4 mice for vehicle, n=6 mice for alpelisib). (D) dsDNA titer in the serum of the *MRL-lpr* mice prior to treatment initiation at 12 weeks old (n=14 mice for vehicle, n=15 mice for alpelisib). (E) Spleen to body weight ratio at sacrifice (n=14 mice per group). (F) Peripheral blood cell counts at sacrifice (n=8 for vehicle, n=9 for alpelisib). (G) Percentage of spleen, peripheral blood mononuclear cell (PBMCs), bone marrow, and lymph node cell population at sacrifice determined by flow cytometry analysis (n=8 mice for vehicle, n=9 mice for alpelisib). For the spleen, absolute cell numbers are also shown. CD4, CD8, B220, Mac1, and Gr1 are used as lineage markers. (H) Serum cytokines (IFN- $\gamma$ , IL-1 $\beta$ , IL-2, IL-5, IL-6, IL-10, KC-GRO, and TNF- $\alpha$ ) at sacrifice (n=13 for vehicle, n=14 for alpelisib). Note that for IL-5, 1 vehicle mouse was below detection range that n=12 for vehicle in IL-5 measurement. (I) Representative IgG/Nephryn, IgM/Nephryn, C3/Nephryn coimmunofluorescence staining of kidneys. Scale bar 20  $\mu$ m. (J) Quantification of the IgG, IgM, and C3 raw intensity per glomerulus (n=6 mice per group). Values are the means  $\pm$  SD. P values calculated using two-way ANOVA with Bonferroni's post hoc test (G), two-tailed t test (C, F), and two-tailed Mann-Whitney U test (B, D, E, H, and J).

A

| Patient (LN) | Treatments                                                       |                                                                     |                                                                     |                                                                     |
|--------------|------------------------------------------------------------------|---------------------------------------------------------------------|---------------------------------------------------------------------|---------------------------------------------------------------------|
| 1            | 2022<br>• Steroids<br>• Mycophenolate mofetil<br>• Obinutuzumab  |                                                                     |                                                                     |                                                                     |
| 2            | 2013<br>• Hydroxychloroquine<br>• Steroids<br>• Cyclophosphamide | 2014<br>• Steroids<br>• Mycophenolate mofetil                       | 2018<br>• Steroids<br>• Mycophenolate mofetil<br>• Rituximab        | 2022<br>• Steroids<br>• Mycophenolate mofetil<br>• Cyclophosphamide |
| 3            | 2012<br>• Steroids<br>• Mycophenolate mofetil<br>• IVIG          | 2019<br>• Steroids<br>• Mycophenolate mofetil<br>• Cyclophosphamide | 2022<br>• Steroids<br>• Mycophenolate mofetil<br>• Cyclophosphamide |                                                                     |
| 4            | 2014<br>• Hydroxychloroquine                                     | 2016<br>• Rituximab                                                 | 2020<br>• Rituximab<br>• Mycophenolate mofetil                      | 2022<br>• Steroids<br>• Cyclophosphamide<br>• Mycophenolate mofetil |

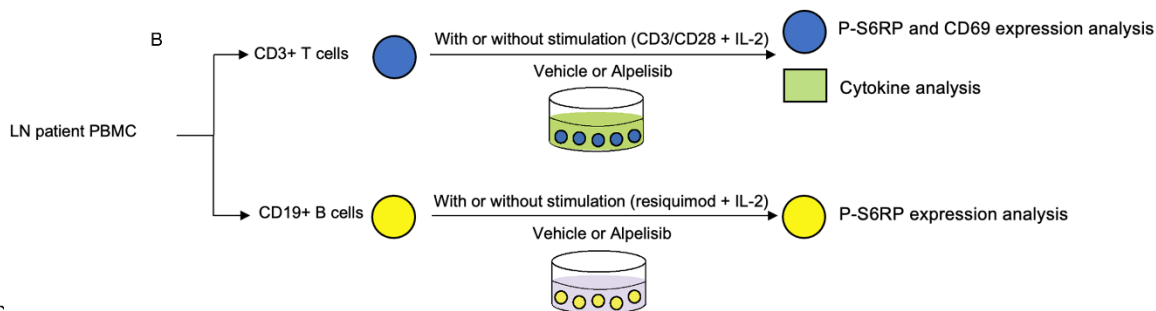

C

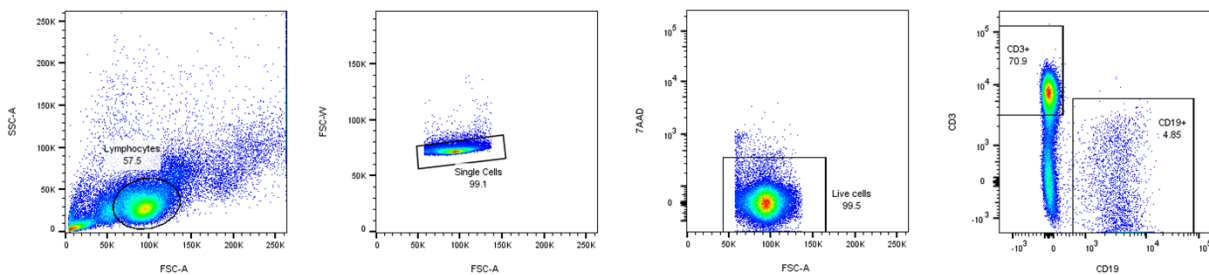

D

| Patients (LN) | Age (yrs.) | Sex | PBMC sorting results |                       |                        | Serum cytokine results (pg/ml) |              |      |      |      |        |       |       |       |               |
|---------------|------------|-----|----------------------|-----------------------|------------------------|--------------------------------|--------------|------|------|------|--------|-------|-------|-------|---------------|
|               |            |     | Lymphocytes (%PBMC)  | CD3+ T cells (% PBMC) | CD19+ B cells (% PBMC) | IFN- $\gamma$                  | IL-1 $\beta$ | IL-2 | IL-4 | IL-6 | IL-8   | IL-10 | IL-12 | IL-13 | TNF- $\alpha$ |
| 1             | 35         | F   | 11.5                 | 9.6                   | 0.047                  | 1.73                           | 0.58         | 0.23 | 0.05 | 1.01 | 124.68 | 0.94  | 0.22  | 0.79  | 4.77          |
| 2             | 21         | F   | 57.2                 | 40.4                  | 2.8                    | 1.04                           | 0.43         | N/A  | 0.04 | 0.75 | 24.23  | 0.85  | 0.12  | 3.49  | 3.83          |
| 3             | 26         | F   | 14.6                 | 12.6                  | 1                      | 20.52                          | 2.29         | 0.36 | 0.06 | 3.85 | 853.13 | 0.66  | 0.35  | 4.17  | 3.98          |
| 4             | 22         | F   | 27                   | 22.9                  | 1.7                    | 4.08                           | 1.40         | 0.18 | 0.03 | 0.46 | 1.90   | 1.70  | NaN   | NaN   | 1.17          |

From MSD data:

|                               |           |           |           |    |           |           |           |           |           |           |
|-------------------------------|-----------|-----------|-----------|----|-----------|-----------|-----------|-----------|-----------|-----------|
| Normal samples median (pg/ml) | 3.77      | 0.16      | 0.52      | ND | 0.47      | 9.61      | 0.2       | 0.29      | 1.65      | 0.36      |
| Range (pg/ml)                 | 0.64-14.4 | 0.11-24.3 | 0.22-2.68 | NA | 0.16-27.2 | 1.48-1720 | 0.06-3.08 | 0.26-0.38 | 0.60-2.78 | 0.10-1.75 |

ND: Not detectable, NA: Not appropriate

E

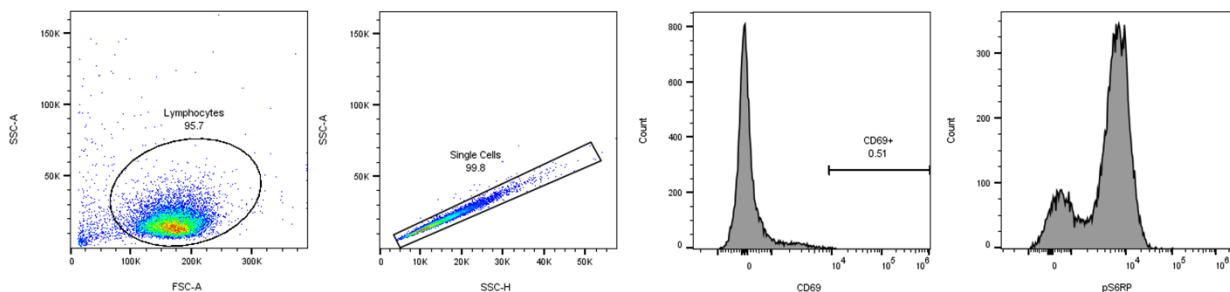

Supplemental Figure 13

**Supplemental Figure 13: Alpelisib impairs the activation of lymphocytes from patients with Lupus Nephritis.** (A) Immunosuppressant medical history of the 4 lupus patients (LN1-LN4) whose PBMCs underwent analysis. (B) Scheme of the study. (C) CD3+ T cell and CD19+ B cell sorting scheme from the PBMCs of lupus patients. (D) Lupus patients' PBMC sorting results for lymphocytes, including CD3+ T cells and CD19+ B cells (% PBMC), and serum cytokine results. The data of normal human serum tested by MSD® for this Proinflammatory Panel 1 (human) kit is shown as a reference. (E) The gating scheme of the phosphoflow analysis of CD3+ T cells 1 day after stimulation and treatment of the cells.

A

- Unstimulated
- Stimulated (CD3/CD28+IL2)
- ▲ Stimulated (CD3/CD28+IL2) + alpelisib 5uM
- ▼ Stimulated (CD3/CD28+IL2) + alpelisib 10uM

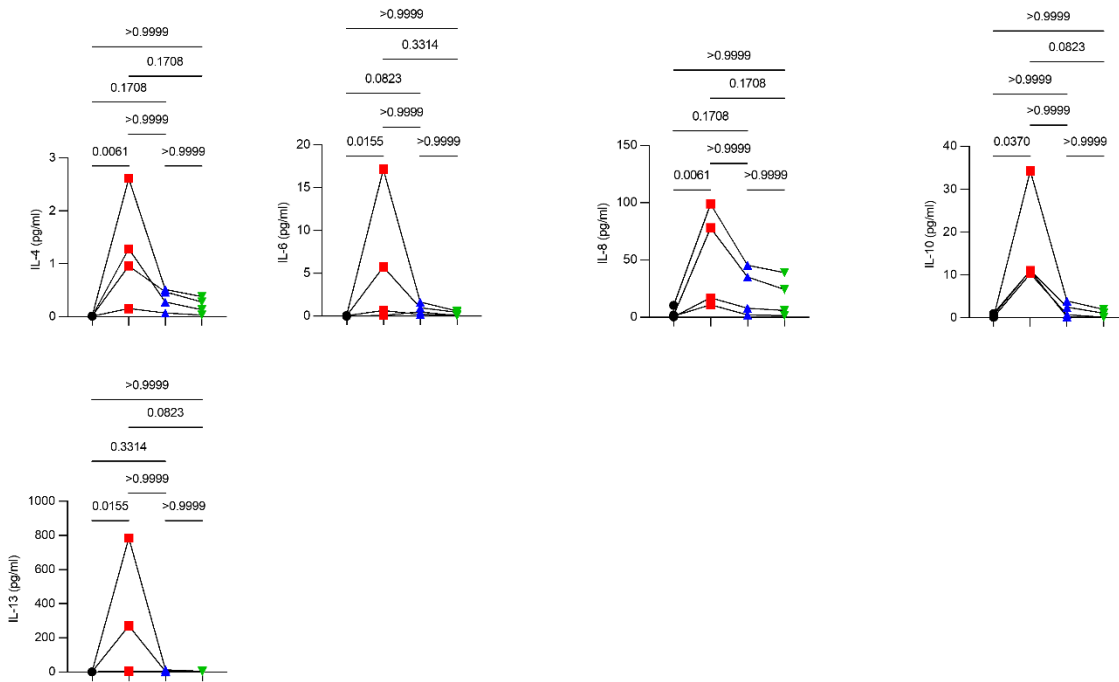

Supplemental Figure 14

**Supplemental Figure 14: Alpelisib impaired, in vitro, B and T cell activation from lupus patients. (A)** Cytokine measurements at day 7 in supernatant from non-stimulated or stimulated CD3+ T cells, treated with the vehicle or 5uM or 10uM alpelisib. Patients LN1-4 are included in the analysis. IL-4, IL-6, IL-8, IL-10 and IL-13 are shown here. Means  $\pm$  SD. P values calculated using one-way ANOVA with Friedman test with Dunn's multiple comparisons test.

**Supplemental Table 1. Representative highly expressed gene lists of 20 clusters**

|                  |                                                                                  |
|------------------|----------------------------------------------------------------------------------|
| <b>p_val</b>     | p-value                                                                          |
| <b>avg_logFC</b> | Average fold change in expression between the compared groups                    |
| <b>pct.1</b>     | Percentage of cells where the gene is detected in the first group (the cluster)  |
| <b>pct.2</b>     | Percentage of cells where the gene is detected in the second group (other cells) |
| <b>p_val_adj</b> | Adjusted p-value based on bonferroni correction using all genes in the dataset   |
| <b>cluster</b>   | Cluster identifier                                                               |
| <b>gene</b>      | Gene identified as a marker                                                      |

| <b>p_val</b> | <b>avg_logFC</b> | <b>pct.1</b> | <b>pct.2</b> | <b>p_val_adj</b> | <b>cluster</b>    | <b>gene</b> |
|--------------|------------------|--------------|--------------|------------------|-------------------|-------------|
| 0.00E+00     | 1.54             | 0.976        | 0.375        | 0.00E+00         | Proximal Tubule-1 | Spp2        |
| 0.00E+00     | 1.44             | 0.981        | 0.251        | 0.00E+00         | Proximal Tubule-1 | Slc5a2      |
| 0.00E+00     | 1.36             | 0.987        | 0.443        | 0.00E+00         | Proximal Tubule-1 | Gatm        |
| 0.00E+00     | 1.30             | 0.878        | 0.274        | 0.00E+00         | Proximal Tubule-1 | Cyp24a1     |
| 0.00E+00     | 1.21             | 1            | 0.985        | 0.00E+00         | Proximal Tubule-1 | Gpx3        |
| 0.00E+00     | 1.16             | 0.965        | 0.352        | 0.00E+00         | Proximal Tubule-1 | Slc6a19     |
| 0.00E+00     | 1.16             | 0.952        | 0.203        | 0.00E+00         | Proximal Tubule-1 | Slc5a12     |
| 0.00E+00     | 1.15             | 0.975        | 0.48         | 0.00E+00         | Proximal Tubule-1 | Nox4        |
| 0.00E+00     | 1.08             | 0.996        | 0.692        | 0.00E+00         | Proximal Tubule-1 | Slc4a4      |
| 0.00E+00     | 0.97             | 0.992        | 0.596        | 0.00E+00         | Proximal Tubule-1 | Maf         |
| 0.00E+00     | 0.97             | 0.747        | 0.162        | 0.00E+00         | Proximal Tubule-1 | Apob        |
| 0.00E+00     | 0.95             | 0.889        | 0.303        | 0.00E+00         | Proximal Tubule-1 | Cyp2d26     |
| 0.00E+00     | 0.92             | 0.934        | 0.367        | 0.00E+00         | Proximal Tubule-1 | Gldc        |
| 0.00E+00     | 0.91             | 0.748        | 0.142        | 0.00E+00         | Proximal Tubule-1 | Shhg11      |
| 0.00E+00     | 0.87             | 0.927        | 0.399        | 0.00E+00         | Proximal Tubule-1 | Slc7a7      |
| 0.00E+00     | 0.86             | 0.902        | 0.316        | 0.00E+00         | Proximal Tubule-1 | Slc7a8      |
| 0.00E+00     | 0.83             | 0.841        | 0.283        | 0.00E+00         | Proximal Tubule-1 | Clec2h      |
| 0.00E+00     | 0.82             | 0.988        | 0.769        | 0.00E+00         | Proximal Tubule-1 | Lgmn        |
| 0.00E+00     | 0.79             | 0.934        | 0.42         | 0.00E+00         | Proximal Tubule-1 | Slc2a2      |
| 0.00E+00     | 0.79             | 0.968        | 0.547        | 0.00E+00         | Proximal Tubule-1 | Fut9        |
| 0.00E+00     | 0.78             | 0.939        | 0.501        | 0.00E+00         | Proximal Tubule-1 | Enpp2       |
| 0.00E+00     | 0.78             | 0.962        | 0.504        | 0.00E+00         | Proximal Tubule-1 | Alpl        |
| 0.00E+00     | 0.76             | 0.999        | 0.882        | 0.00E+00         | Proximal Tubule-1 | Ndrp1       |
| 0.00E+00     | 0.76             | 0.985        | 0.627        | 0.00E+00         | Proximal Tubule-1 | Dab2        |
| 0.00E+00     | 0.75             | 0.967        | 0.581        | 0.00E+00         | Proximal Tubule-1 | Idh1        |
| 0.00E+00     | 0.73             | 0.943        | 0.537        | 0.00E+00         | Proximal Tubule-1 | G6pc        |
| 0.00E+00     | 0.70             | 0.991        | 0.794        | 0.00E+00         | Proximal Tubule-1 | Pdzk1ip1    |
| 0.00E+00     | 0.69             | 0.893        | 0.344        | 0.00E+00         | Proximal Tubule-1 | Acss1       |
| 0.00E+00     | 0.69             | 0.951        | 0.513        | 0.00E+00         | Proximal Tubule-1 | Lipa        |
| 0.00E+00     | 0.66             | 0.994        | 0.755        | 0.00E+00         | Proximal Tubule-1 | Citrn       |
| 0.00E+00     | 0.66             | 1            | 0.809        | 0.00E+00         | Proximal Tubule-1 | Slc34a1     |
| 0.00E+00     | 0.66             | 0.723        | 0.081        | 0.00E+00         | Proximal Tubule-1 | Slc34a3     |
| 0.00E+00     | 0.65             | 0.983        | 0.681        | 0.00E+00         | Proximal Tubule-1 | Igfbp4      |
| 0.00E+00     | 0.64             | 0.95         | 0.575        | 0.00E+00         | Proximal Tubule-1 | Gsta2       |
| 0.00E+00     | 0.63             | 0.956        | 0.613        | 0.00E+00         | Proximal Tubule-1 | Asl         |
| 0.00E+00     | 0.63             | 0.995        | 0.802        | 0.00E+00         | Proximal Tubule-1 | Spink1      |
| 0.00E+00     | 0.62             | 0.899        | 0.481        | 0.00E+00         | Proximal Tubule-1 | Slc43a2     |
| 0.00E+00     | 0.62             | 0.611        | 0.064        | 0.00E+00         | Proximal Tubule-1 | 630023F18Ri |
| 0.00E+00     | 0.61             | 0.885        | 0.505        | 0.00E+00         | Proximal Tubule-1 | Creg1       |
| 0.00E+00     | 0.60             | 0.863        | 0.343        | 0.00E+00         | Proximal Tubule-1 | Folh1       |
| 0.00E+00     | 0.59             | 0.974        | 0.609        | 0.00E+00         | Proximal Tubule-1 | Slc13a1     |
| 0.00E+00     | 0.58             | 0.824        | 0.287        | 0.00E+00         | Proximal Tubule-1 | Prodh2      |
| 0.00E+00     | 0.56             | 0.755        | 0.227        | 0.00E+00         | Proximal Tubule-1 | Dpep1       |
| 0.00E+00     | 0.55             | 0.7          | 0.314        | 0.00E+00         | Proximal Tubule-1 | Rcan1       |
| 0.00E+00     | 0.54             | 0.75         | 0.276        | 0.00E+00         | Proximal Tubule-1 | Slc16a1     |
| 0.00E+00     | 0.53             | 0.942        | 0.55         | 0.00E+00         | Proximal Tubule-1 | Dnase1      |
| 0.00E+00     | 0.53             | 0.91         | 0.466        | 0.00E+00         | Proximal Tubule-1 | Cldn2       |
| 0.00E+00     | 0.53             | 0.947        | 0.534        | 0.00E+00         | Proximal Tubule-1 | Apoe        |
| 0.00E+00     | 0.52             | 0.991        | 0.743        | 0.00E+00         | Proximal Tubule-1 | Errfi1      |
| 0.00E+00     | 0.51             | 0.984        | 0.875        | 0.00E+00         | Proximal Tubule-1 | Mif         |
| 0.00E+00     | 0.51             | 0.946        | 0.578        | 0.00E+00         | Proximal Tubule-1 | Prodh       |
| 0.00E+00     | 0.51             | 0.874        | 0.485        | 0.00E+00         | Proximal Tubule-1 | Slc6a8      |

|          |      |       |       |          |                   |          |
|----------|------|-------|-------|----------|-------------------|----------|
| 0.00E+00 | 0.50 | 0.727 | 0.176 | 0.00E+00 | Proximal Tubule-1 | Npl      |
| 0.00E+00 | 0.50 | 0.902 | 0.546 | 0.00E+00 | Proximal Tubule-1 | Nus1     |
| 0.00E+00 | 0.50 | 0.942 | 0.67  | 0.00E+00 | Proximal Tubule-1 | Slc3a2   |
| 0.00E+00 | 1.66 | 1     | 0.989 | 0.00E+00 | Proximal Tubule-2 | Kap      |
| 0.00E+00 | 1.29 | 0.954 | 0.216 | 0.00E+00 | Proximal Tubule-2 | Slc7a13  |
| 0.00E+00 | 1.26 | 0.994 | 0.568 | 0.00E+00 | Proximal Tubule-2 | Cyp2e1   |
| 0.00E+00 | 1.18 | 0.885 | 0.246 | 0.00E+00 | Proximal Tubule-2 | Cyp2a4   |
| 0.00E+00 | 1.18 | 0.995 | 0.459 | 0.00E+00 | Proximal Tubule-2 | Slc22a6  |
| 0.00E+00 | 1.16 | 0.855 | 0.129 | 0.00E+00 | Proximal Tubule-2 | Slco1a1  |
| 0.00E+00 | 1.16 | 1     | 0.775 | 0.00E+00 | Proximal Tubule-2 | Cyp4b1   |
| 0.00E+00 | 1.14 | 0.956 | 0.345 | 0.00E+00 | Proximal Tubule-2 | Cyp2d9   |
| 0.00E+00 | 1.10 | 0.991 | 0.582 | 0.00E+00 | Proximal Tubule-2 | Cndp2    |
| 0.00E+00 | 1.09 | 0.994 | 0.596 | 0.00E+00 | Proximal Tubule-2 | Acy3     |
| 0.00E+00 | 1.08 | 0.994 | 0.524 | 0.00E+00 | Proximal Tubule-2 | Mep1a    |
| 0.00E+00 | 1.07 | 0.965 | 0.398 | 0.00E+00 | Proximal Tubule-2 | Nat8     |
| 0.00E+00 | 1.02 | 1     | 0.748 | 0.00E+00 | Proximal Tubule-2 | Slc27a2  |
| 0.00E+00 | 1.01 | 0.99  | 0.573 | 0.00E+00 | Proximal Tubule-2 | Inmt     |
| 0.00E+00 | 1.01 | 0.967 | 0.365 | 0.00E+00 | Proximal Tubule-2 | Tmigd1   |
| 0.00E+00 | 1.00 | 0.985 | 0.396 | 0.00E+00 | Proximal Tubule-2 | Ces1f    |
| 0.00E+00 | 0.98 | 0.978 | 0.538 | 0.00E+00 | Proximal Tubule-2 | Nat8f1   |
| 0.00E+00 | 0.97 | 0.958 | 0.404 | 0.00E+00 | Proximal Tubule-2 | Ces2c    |
| 0.00E+00 | 0.97 | 0.998 | 0.652 | 0.00E+00 | Proximal Tubule-2 | Acaa1b   |
| 0.00E+00 | 0.96 | 0.986 | 0.557 | 0.00E+00 | Proximal Tubule-2 | Ugt2b38  |
| 0.00E+00 | 0.96 | 0.859 | 0.173 | 0.00E+00 | Proximal Tubule-2 | Acsm3    |
| 0.00E+00 | 0.95 | 0.989 | 0.635 | 0.00E+00 | Proximal Tubule-2 | Nudt19   |
| 0.00E+00 | 0.91 | 0.997 | 0.667 | 0.00E+00 | Proximal Tubule-2 | Cyp4a10  |
| 0.00E+00 | 0.89 | 1     | 0.762 | 0.00E+00 | Proximal Tubule-2 | Acsm2    |
| 0.00E+00 | 0.86 | 0.992 | 0.653 | 0.00E+00 | Proximal Tubule-2 | Ehhadh   |
| 0.00E+00 | 0.86 | 0.779 | 0.283 | 0.00E+00 | Proximal Tubule-2 | Cyp2a5   |
| 0.00E+00 | 0.86 | 1     | 0.906 | 0.00E+00 | Proximal Tubule-2 | Chpt1    |
| 0.00E+00 | 0.86 | 0.999 | 0.691 | 0.00E+00 | Proximal Tubule-2 | Akr1c21  |
| 0.00E+00 | 0.86 | 0.991 | 0.692 | 0.00E+00 | Proximal Tubule-2 | Ggt1     |
| 0.00E+00 | 0.85 | 0.994 | 0.544 | 0.00E+00 | Proximal Tubule-2 | Napsa    |
| 0.00E+00 | 0.85 | 0.999 | 0.632 | 0.00E+00 | Proximal Tubule-2 | Keg1     |
| 0.00E+00 | 0.85 | 0.993 | 0.607 | 0.00E+00 | Proximal Tubule-2 | Slc22a12 |
| 0.00E+00 | 0.85 | 0.826 | 0.169 | 0.00E+00 | Proximal Tubule-2 | Azgp1    |
| 0.00E+00 | 0.84 | 0.903 | 0.26  | 0.00E+00 | Proximal Tubule-2 | Cd36     |
| 0.00E+00 | 0.83 | 0.97  | 0.541 | 0.00E+00 | Proximal Tubule-2 | Ldhd     |
| 0.00E+00 | 0.82 | 0.987 | 0.58  | 0.00E+00 | Proximal Tubule-2 | Tmem252  |
| 0.00E+00 | 0.82 | 0.963 | 0.437 | 0.00E+00 | Proximal Tubule-2 | Slc17a3  |
| 0.00E+00 | 0.82 | 0.994 | 0.796 | 0.00E+00 | Proximal Tubule-2 | Acox1    |
| 0.00E+00 | 0.80 | 0.901 | 0.231 | 0.00E+00 | Proximal Tubule-2 | Slc5a8   |
| 0.00E+00 | 0.80 | 0.651 | 0.118 | 0.00E+00 | Proximal Tubule-2 | Ugt2b37  |
| 0.00E+00 | 0.79 | 0.953 | 0.447 | 0.00E+00 | Proximal Tubule-2 | Eci3     |
| 0.00E+00 | 0.79 | 0.987 | 0.598 | 0.00E+00 | Proximal Tubule-2 | Cyp4a14  |
| 0.00E+00 | 0.78 | 0.995 | 0.624 | 0.00E+00 | Proximal Tubule-2 | Cyp2j5   |
| 0.00E+00 | 0.78 | 0.942 | 0.363 | 0.00E+00 | Proximal Tubule-2 | Slc22a2  |
| 0.00E+00 | 0.77 | 0.931 | 0.273 | 0.00E+00 | Proximal Tubule-2 | Slc6a18  |
| 0.00E+00 | 0.77 | 0.973 | 0.679 | 0.00E+00 | Proximal Tubule-2 | Tmem205  |
| 0.00E+00 | 0.76 | 0.831 | 0.206 | 0.00E+00 | Proximal Tubule-2 | Mogat1   |
| 0.00E+00 | 0.76 | 0.986 | 0.549 | 0.00E+00 | Proximal Tubule-2 | Ugt3a2   |
| 0.00E+00 | 0.75 | 0.999 | 0.902 | 0.00E+00 | Proximal Tubule-2 | Cyb5a    |
| 0.00E+00 | 0.75 | 0.949 | 0.574 | 0.00E+00 | Proximal Tubule-2 | Retsat   |
| 0.00E+00 | 0.75 | 0.978 | 0.608 | 0.00E+00 | Proximal Tubule-2 | Guca2b   |
| 0.00E+00 | 0.75 | 0.994 | 0.791 | 0.00E+00 | Proximal Tubule-2 | Ttc36    |
| 0.00E+00 | 0.74 | 0.984 | 0.557 | 0.00E+00 | Proximal Tubule-2 | Slc17a1  |
| 0.00E+00 | 0.74 | 0.97  | 0.606 | 0.00E+00 | Proximal Tubule-2 | Pank1    |
| 0.00E+00 | 0.74 | 0.959 | 0.561 | 0.00E+00 | Proximal Tubule-2 | Crot     |
| 0.00E+00 | 0.74 | 0.982 | 0.565 | 0.00E+00 | Proximal Tubule-2 | Cyp4a31  |
| 0.00E+00 | 0.74 | 0.958 | 0.5   | 0.00E+00 | Proximal Tubule-2 | Me1      |
| 0.00E+00 | 0.73 | 0.967 | 0.491 | 0.00E+00 | Proximal Tubule-2 | Slc13a3  |
| 0.00E+00 | 0.72 | 0.948 | 0.402 | 0.00E+00 | Proximal Tubule-2 | Ugt3a1   |
| 0.00E+00 | 0.72 | 0.877 | 0.254 | 0.00E+00 | Proximal Tubule-2 | Slc22a30 |
| 0.00E+00 | 0.72 | 0.994 | 0.849 | 0.00E+00 | Proximal Tubule-2 | Tmem176a |



|          |      |       |       |          |                   |             |
|----------|------|-------|-------|----------|-------------------|-------------|
| 0.00E+00 | 0.72 | 0.746 | 0.215 | 0.00E+00 | Proximal Tubule-2 | Hpd         |
| 0.00E+00 | 0.71 | 0.99  | 0.632 | 0.00E+00 | Proximal Tubule-2 | Cda         |
| 0.00E+00 | 0.70 | 0.895 | 0.331 | 0.00E+00 | Proximal Tubule-2 | 630029K05Ri |
| 0.00E+00 | 0.70 | 0.893 | 0.34  | 0.00E+00 | Proximal Tubule-2 | Atp11a      |
| 0.00E+00 | 0.69 | 0.983 | 0.59  | 0.00E+00 | Proximal Tubule-2 | Kcnj15      |
| 0.00E+00 | 0.69 | 0.918 | 0.481 | 0.00E+00 | Proximal Tubule-2 | Hao2        |
| 0.00E+00 | 0.68 | 0.973 | 0.543 | 0.00E+00 | Proximal Tubule-2 | Mfsd4b5     |
| 0.00E+00 | 0.68 | 0.992 | 0.676 | 0.00E+00 | Proximal Tubule-2 | Hmgcs2      |
| 0.00E+00 | 0.68 | 0.977 | 0.602 | 0.00E+00 | Proximal Tubule-2 | Ephx2       |
| 0.00E+00 | 0.66 | 0.914 | 0.407 | 0.00E+00 | Proximal Tubule-2 | Car4        |
| 0.00E+00 | 0.66 | 0.893 | 0.398 | 0.00E+00 | Proximal Tubule-2 | Mettl7b     |
| 0.00E+00 | 0.65 | 0.999 | 0.85  | 0.00E+00 | Proximal Tubule-2 | Rida        |
| 0.00E+00 | 0.64 | 0.915 | 0.444 | 0.00E+00 | Proximal Tubule-2 | Csad        |
| 0.00E+00 | 0.64 | 0.962 | 0.573 | 0.00E+00 | Proximal Tubule-2 | Pecr        |
| 0.00E+00 | 0.64 | 1     | 0.814 | 0.00E+00 | Proximal Tubule-2 | Slc34a1     |
| 0.00E+00 | 0.64 | 0.89  | 0.369 | 0.00E+00 | Proximal Tubule-2 | Adh1        |
| 0.00E+00 | 0.63 | 0.975 | 0.639 | 0.00E+00 | Proximal Tubule-2 | Lap3        |
| 0.00E+00 | 0.63 | 0.983 | 0.693 | 0.00E+00 | Proximal Tubule-2 | Gclm        |
| 0.00E+00 | 0.62 | 0.918 | 0.397 | 0.00E+00 | Proximal Tubule-2 | Adtrp       |
| 0.00E+00 | 0.61 | 0.927 | 0.493 | 0.00E+00 | Proximal Tubule-2 | Papss2      |
| 0.00E+00 | 0.60 | 0.916 | 0.422 | 0.00E+00 | Proximal Tubule-2 | Acot12      |
| 0.00E+00 | 0.60 | 0.956 | 0.562 | 0.00E+00 | Proximal Tubule-2 | Slc22a18    |
| 0.00E+00 | 0.60 | 0.876 | 0.291 | 0.00E+00 | Proximal Tubule-2 | Slc5a10     |
| 0.00E+00 | 0.60 | 0.953 | 0.504 | 0.00E+00 | Proximal Tubule-2 | Slc3a1      |
| 0.00E+00 | 0.59 | 1     | 0.963 | 0.00E+00 | Proximal Tubule-2 | Dbi         |
| 0.00E+00 | 0.59 | 0.967 | 0.548 | 0.00E+00 | Proximal Tubule-2 | Gm19950     |
| 0.00E+00 | 0.59 | 0.954 | 0.531 | 0.00E+00 | Proximal Tubule-2 | Cmb1        |
| 0.00E+00 | 0.59 | 0.958 | 0.6   | 0.00E+00 | Proximal Tubule-2 | Ghr         |
| 0.00E+00 | 0.59 | 0.778 | 0.35  | 0.00E+00 | Proximal Tubule-2 | Defb29      |
| 0.00E+00 | 0.59 | 1     | 0.955 | 0.00E+00 | Proximal Tubule-2 | Gpx1        |
| 0.00E+00 | 0.59 | 0.683 | 0.226 | 0.00E+00 | Proximal Tubule-2 | Gm45792     |
| 0.00E+00 | 0.58 | 0.979 | 0.664 | 0.00E+00 | Proximal Tubule-2 | Lpl         |
| 0.00E+00 | 0.58 | 0.906 | 0.559 | 0.00E+00 | Proximal Tubule-2 | Tmem37      |
| 0.00E+00 | 0.57 | 0.955 | 0.5   | 0.00E+00 | Proximal Tubule-2 | Slc47a1     |
| 0.00E+00 | 0.57 | 0.902 | 0.421 | 0.00E+00 | Proximal Tubule-2 | Vnn1        |
| 0.00E+00 | 0.57 | 0.942 | 0.536 | 0.00E+00 | Proximal Tubule-2 | Cryz12      |
| 0.00E+00 | 0.57 | 0.974 | 0.7   | 0.00E+00 | Proximal Tubule-2 | Ccdc107     |
| 0.00E+00 | 0.57 | 0.974 | 0.587 | 0.00E+00 | Proximal Tubule-2 | Fmo2        |
| 0.00E+00 | 0.56 | 0.989 | 0.65  | 0.00E+00 | Proximal Tubule-2 | Lrp2        |
| 0.00E+00 | 0.56 | 0.869 | 0.394 | 0.00E+00 | Proximal Tubule-2 | Cgref1      |
| 0.00E+00 | 0.56 | 0.97  | 0.66  | 0.00E+00 | Proximal Tubule-2 | Acot1       |
| 0.00E+00 | 0.56 | 0.842 | 0.329 | 0.00E+00 | Proximal Tubule-2 | Serpinf2    |
| 0.00E+00 | 0.56 | 0.971 | 0.649 | 0.00E+00 | Proximal Tubule-2 | Aldh9a1     |
| 0.00E+00 | 0.56 | 0.99  | 0.759 | 0.00E+00 | Proximal Tubule-2 | Cat         |
| 0.00E+00 | 0.56 | 0.994 | 0.873 | 0.00E+00 | Proximal Tubule-2 | Tmem176b    |
| 0.00E+00 | 0.56 | 0.878 | 0.51  | 0.00E+00 | Proximal Tubule-2 | Hsd17b11    |
| 0.00E+00 | 0.56 | 0.962 | 0.549 | 0.00E+00 | Proximal Tubule-2 | Aass        |
| 0.00E+00 | 0.56 | 0.944 | 0.63  | 0.00E+00 | Proximal Tubule-2 | Dhrs4       |
| 0.00E+00 | 0.55 | 0.878 | 0.329 | 0.00E+00 | Proximal Tubule-2 | Rdh16f2     |
| 0.00E+00 | 0.55 | 0.99  | 0.653 | 0.00E+00 | Proximal Tubule-2 | Glyat       |
| 0.00E+00 | 0.54 | 0.789 | 0.229 | 0.00E+00 | Proximal Tubule-2 | Bhmt2       |
| 0.00E+00 | 0.54 | 0.852 | 0.346 | 0.00E+00 | Proximal Tubule-2 | Proc        |
| 0.00E+00 | 0.54 | 0.954 | 0.702 | 0.00E+00 | Proximal Tubule-2 | Msrb1       |
| 0.00E+00 | 0.54 | 0.964 | 0.651 | 0.00E+00 | Proximal Tubule-2 | Bphl        |
| 0.00E+00 | 0.54 | 0.858 | 0.415 | 0.00E+00 | Proximal Tubule-2 | Amacr       |
| 0.00E+00 | 0.53 | 0.968 | 0.603 | 0.00E+00 | Proximal Tubule-2 | Calml4      |
| 0.00E+00 | 0.53 | 0.744 | 0.186 | 0.00E+00 | Proximal Tubule-2 | Cyp2j13     |
| 0.00E+00 | 0.53 | 0.962 | 0.587 | 0.00E+00 | Proximal Tubule-2 | Ddah1       |
| 0.00E+00 | 0.52 | 0.97  | 0.691 | 0.00E+00 | Proximal Tubule-2 | Gstt2       |
| 0.00E+00 | 0.52 | 0.916 | 0.558 | 0.00E+00 | Proximal Tubule-2 | Dnajc12     |
| 0.00E+00 | 0.52 | 0.965 | 0.544 | 0.00E+00 | Proximal Tubule-2 | Tmem174     |
| 0.00E+00 | 0.52 | 0.796 | 0.408 | 0.00E+00 | Proximal Tubule-2 | G0s2        |
| 0.00E+00 | 0.52 | 0.968 | 0.711 | 0.00E+00 | Proximal Tubule-2 | Mettl26     |
| 0.00E+00 | 0.52 | 0.974 | 0.606 | 0.00E+00 | Proximal Tubule-2 | Folr1       |

|          |      |       |       |          |                   |          |
|----------|------|-------|-------|----------|-------------------|----------|
| 0.00E+00 | 0.52 | 0.869 | 0.436 | 0.00E+00 | Proximal Tubule-2 | Coasy    |
| 0.00E+00 | 0.52 | 0.963 | 0.579 | 0.00E+00 | Proximal Tubule-2 | Gk       |
| 0.00E+00 | 0.51 | 0.895 | 0.498 | 0.00E+00 | Proximal Tubule-2 | Hyi      |
| 0.00E+00 | 0.51 | 0.968 | 0.567 | 0.00E+00 | Proximal Tubule-2 | Al314278 |
| 0.00E+00 | 0.51 | 0.944 | 0.586 | 0.00E+00 | Proximal Tubule-2 | Galnt11  |
| 0.00E+00 | 0.51 | 0.932 | 0.56  | 0.00E+00 | Proximal Tubule-2 | Fuca2    |
| 0.00E+00 | 0.51 | 0.92  | 0.484 | 0.00E+00 | Proximal Tubule-2 | Aqp1     |
| 0.00E+00 | 0.51 | 0.831 | 0.346 | 0.00E+00 | Proximal Tubule-2 | Hykk     |
| 0.00E+00 | 0.51 | 0.992 | 0.83  | 0.00E+00 | Proximal Tubule-2 | Scp2     |
| 0.00E+00 | 0.51 | 0.819 | 0.366 | 0.00E+00 | Proximal Tubule-2 | Fitm1    |
| 0.00E+00 | 0.50 | 0.884 | 0.439 | 0.00E+00 | Proximal Tubule-2 | Gas2     |
| 0.00E+00 | 0.50 | 0.998 | 0.89  | 0.00E+00 | Proximal Tubule-2 | Selenop  |
| 0.00E+00 | 0.50 | 0.875 | 0.382 | 0.00E+00 | Proximal Tubule-2 | Slco1a6  |
| 1.75E-52 | 0.53 | 0.764 | 0.603 | 5.41E-48 | Proximal Tubule-2 | Lars2    |
| 0.00E+00 | 1.09 | 1     | 0.99  | 0.00E+00 | Proximal Tubule-3 | Kap      |
| 0.00E+00 | 1.00 | 0.959 | 0.577 | 0.00E+00 | Proximal Tubule-3 | Inmt     |
| 0.00E+00 | 0.97 | 0.93  | 0.591 | 0.00E+00 | Proximal Tubule-3 | Cndp2    |
| 0.00E+00 | 0.94 | 0.988 | 0.654 | 0.00E+00 | Proximal Tubule-3 | Acaa1b   |
| 0.00E+00 | 0.92 | 0.998 | 0.85  | 0.00E+00 | Proximal Tubule-3 | Rida     |
| 0.00E+00 | 0.91 | 0.992 | 0.693 | 0.00E+00 | Proximal Tubule-3 | Akr1c21  |
| 0.00E+00 | 0.91 | 0.993 | 0.791 | 0.00E+00 | Proximal Tubule-3 | Ttc36    |
| 0.00E+00 | 0.90 | 0.98  | 0.678 | 0.00E+00 | Proximal Tubule-3 | Hmgcs2   |
| 0.00E+00 | 0.89 | 0.95  | 0.602 | 0.00E+00 | Proximal Tubule-3 | Acy3     |
| 0.00E+00 | 0.85 | 0.881 | 0.458 | 0.00E+00 | Proximal Tubule-3 | Eci3     |
| 0.00E+00 | 0.84 | 0.992 | 0.903 | 0.00E+00 | Proximal Tubule-3 | Cyb5a    |
| 0.00E+00 | 0.82 | 0.968 | 0.636 | 0.00E+00 | Proximal Tubule-3 | Cda      |
| 0.00E+00 | 0.80 | 0.966 | 0.573 | 0.00E+00 | Proximal Tubule-3 | Cyp2e1   |
| 0.00E+00 | 0.77 | 0.998 | 0.799 | 0.00E+00 | Proximal Tubule-3 | Ass1     |
| 0.00E+00 | 0.77 | 0.899 | 0.581 | 0.00E+00 | Proximal Tubule-3 | Pecr     |
| 0.00E+00 | 0.76 | 0.966 | 0.637 | 0.00E+00 | Proximal Tubule-3 | Keg1     |
| 0.00E+00 | 0.76 | 0.996 | 0.757 | 0.00E+00 | Proximal Tubule-3 | Miox     |
| 0.00E+00 | 0.72 | 0.884 | 0.551 | 0.00E+00 | Proximal Tubule-3 | Nat8f1   |
| 0.00E+00 | 0.71 | 0.896 | 0.67  | 0.00E+00 | Proximal Tubule-3 | Acot1    |
| 0.00E+00 | 0.71 | 0.908 | 0.646 | 0.00E+00 | Proximal Tubule-3 | Nudt19   |
| 0.00E+00 | 0.70 | 1     | 0.859 | 0.00E+00 | Proximal Tubule-3 | Aldob    |
| 0.00E+00 | 0.70 | 0.912 | 0.611 | 0.00E+00 | Proximal Tubule-3 | Ephx2    |
| 0.00E+00 | 0.69 | 0.981 | 0.702 | 0.00E+00 | Proximal Tubule-3 | Fbp1     |
| 0.00E+00 | 0.69 | 0.916 | 0.47  | 0.00E+00 | Proximal Tubule-3 | Slc22a6  |
| 0.00E+00 | 0.68 | 0.937 | 0.614 | 0.00E+00 | Proximal Tubule-3 | Guca2b   |
| 0.00E+00 | 0.68 | 0.999 | 0.955 | 0.00E+00 | Proximal Tubule-3 | Gpx1     |
| 0.00E+00 | 0.68 | 0.987 | 0.777 | 0.00E+00 | Proximal Tubule-3 | Cyp4b1   |
| 0.00E+00 | 0.67 | 0.954 | 0.697 | 0.00E+00 | Proximal Tubule-3 | Ggt1     |
| 0.00E+00 | 0.67 | 0.891 | 0.641 | 0.00E+00 | Proximal Tubule-3 | Grhpr    |
| 0.00E+00 | 0.67 | 0.843 | 0.549 | 0.00E+00 | Proximal Tubule-3 | Cryz12   |
| 0.00E+00 | 0.67 | 0.833 | 0.383 | 0.00E+00 | Proximal Tubule-3 | Tmigd1   |
| 0.00E+00 | 0.66 | 0.859 | 0.641 | 0.00E+00 | Proximal Tubule-3 | Dhrs4    |
| 0.00E+00 | 0.66 | 0.892 | 0.711 | 0.00E+00 | Proximal Tubule-3 | Msrb1    |
| 0.00E+00 | 0.65 | 0.715 | 0.35  | 0.00E+00 | Proximal Tubule-3 | Rdh16f2  |
| 0.00E+00 | 0.65 | 0.89  | 0.651 | 0.00E+00 | Proximal Tubule-3 | Lap3     |
| 0.00E+00 | 0.65 | 0.85  | 0.545 | 0.00E+00 | Proximal Tubule-3 | Cmb1     |
| 0.00E+00 | 0.65 | 0.886 | 0.661 | 0.00E+00 | Proximal Tubule-3 | Bph1     |
| 0.00E+00 | 0.65 | 1     | 0.963 | 0.00E+00 | Proximal Tubule-3 | Dbi      |
| 0.00E+00 | 0.64 | 0.815 | 0.418 | 0.00E+00 | Proximal Tubule-3 | Nat8     |
| 0.00E+00 | 0.63 | 0.798 | 0.517 | 0.00E+00 | Proximal Tubule-3 | Tst      |
| 0.00E+00 | 0.63 | 0.95  | 0.706 | 0.00E+00 | Proximal Tubule-3 | Khk      |
| 0.00E+00 | 0.62 | 0.997 | 0.929 | 0.00E+00 | Proximal Tubule-3 | Akr1a1   |
| 0.00E+00 | 0.62 | 0.961 | 0.658 | 0.00E+00 | Proximal Tubule-3 | Glyat    |
| 0.00E+00 | 0.61 | 0.981 | 0.892 | 0.00E+00 | Proximal Tubule-3 | Etfb     |
| 0.00E+00 | 0.60 | 0.842 | 0.558 | 0.00E+00 | Proximal Tubule-3 | Ldhd     |
| 0.00E+00 | 0.60 | 0.753 | 0.372 | 0.00E+00 | Proximal Tubule-3 | Cyp2d9   |
| 0.00E+00 | 0.60 | 0.709 | 0.393 | 0.00E+00 | Proximal Tubule-3 | Adh1     |
| 0.00E+00 | 0.60 | 0.799 | 0.497 | 0.00E+00 | Proximal Tubule-3 | Hao2     |
| 0.00E+00 | 0.59 | 0.865 | 0.617 | 0.00E+00 | Proximal Tubule-3 | MsrA     |
| 0.00E+00 | 0.59 | 0.975 | 0.893 | 0.00E+00 | Proximal Tubule-3 | Ech1     |

|           |      |       |       |           |                   |             |
|-----------|------|-------|-------|-----------|-------------------|-------------|
| 0.00E+00  | 0.59 | 0.831 | 0.417 | 0.00E+00  | Proximal Tubule-3 | Ces1f       |
| 0.00E+00  | 0.58 | 0.696 | 0.314 | 0.00E+00  | Proximal Tubule-3 | Slc5a10     |
| 0.00E+00  | 0.58 | 0.962 | 0.834 | 0.00E+00  | Proximal Tubule-3 | Scp2        |
| 0.00E+00  | 0.58 | 0.997 | 0.906 | 0.00E+00  | Proximal Tubule-3 | Chpt1       |
| 0.00E+00  | 0.57 | 0.888 | 0.619 | 0.00E+00  | Proximal Tubule-3 | Fah         |
| 0.00E+00  | 0.57 | 0.873 | 0.572 | 0.00E+00  | Proximal Tubule-3 | Ugt2b38     |
| 0.00E+00  | 0.56 | 0.938 | 0.615 | 0.00E+00  | Proximal Tubule-3 | Slc22a12    |
| 0.00E+00  | 0.56 | 0.834 | 0.619 | 0.00E+00  | Proximal Tubule-3 | Mcrip2      |
| 0.00E+00  | 0.55 | 0.876 | 0.692 | 0.00E+00  | Proximal Tubule-3 | Eci1        |
| 0.00E+00  | 0.54 | 0.931 | 0.742 | 0.00E+00  | Proximal Tubule-3 | Stard10     |
| 0.00E+00  | 0.54 | 0.871 | 0.683 | 0.00E+00  | Proximal Tubule-3 | Csrp2       |
| 0.00E+00  | 0.53 | 0.992 | 0.972 | 0.00E+00  | Proximal Tubule-3 | Gapdh       |
| 0.00E+00  | 0.53 | 0.985 | 0.804 | 0.00E+00  | Proximal Tubule-3 | Sord        |
| 0.00E+00  | 0.53 | 0.78  | 0.428 | 0.00E+00  | Proximal Tubule-3 | Ces2c       |
| 0.00E+00  | 0.53 | 0.871 | 0.58  | 0.00E+00  | Proximal Tubule-3 | A1314278    |
| 0.00E+00  | 0.53 | 0.992 | 0.75  | 0.00E+00  | Proximal Tubule-3 | Slc27a2     |
| 0.00E+00  | 0.53 | 0.731 | 0.431 | 0.00E+00  | Proximal Tubule-3 | Car4        |
| 0.00E+00  | 0.53 | 0.956 | 0.658 | 0.00E+00  | Proximal Tubule-3 | Ehhadh      |
| 0.00E+00  | 0.53 | 0.91  | 0.718 | 0.00E+00  | Proximal Tubule-3 | Akr7a5      |
| 0.00E+00  | 0.53 | 0.94  | 0.831 | 0.00E+00  | Proximal Tubule-3 | Aldh2       |
| 0.00E+00  | 0.53 | 0.807 | 0.52  | 0.00E+00  | Proximal Tubule-3 | Me1         |
| 0.00E+00  | 0.52 | 0.958 | 0.868 | 0.00E+00  | Proximal Tubule-3 | Txn1        |
| 0.00E+00  | 0.51 | 0.677 | 0.36  | 0.00E+00  | Proximal Tubule-3 | 630029K05Ri |
| 0.00E+00  | 0.51 | 0.931 | 0.803 | 0.00E+00  | Proximal Tubule-3 | Ddt         |
| 0.00E+00  | 0.51 | 0.978 | 0.815 | 0.00E+00  | Proximal Tubule-3 | Cyba        |
| 0.00E+00  | 0.50 | 0.94  | 0.632 | 0.00E+00  | Proximal Tubule-3 | Cyp2j5      |
| 3.04E-305 | 0.55 | 0.938 | 0.808 | 9.43E-301 | Proximal Tubule-3 | Hibadh      |
| 7.79E-305 | 0.52 | 0.885 | 0.614 | 2.41E-300 | Proximal Tubule-3 | Calml4      |
| 9.73E-302 | 0.50 | 0.849 | 0.562 | 3.01E-297 | Proximal Tubule-3 | Bdh2        |
| 1.47E-299 | 0.56 | 0.805 | 0.573 | 4.55E-295 | Proximal Tubule-3 | Tmem37      |
| 9.81E-295 | 0.55 | 0.925 | 0.767 | 3.04E-290 | Proximal Tubule-3 | Selenbp1    |
| 3.79E-282 | 0.51 | 0.892 | 0.705 | 1.17E-277 | Proximal Tubule-3 | Gclm        |
| 1.11E-276 | 0.50 | 0.84  | 0.631 | 3.45E-272 | Proximal Tubule-3 | Gcdh        |
| 1.00E-267 | 0.56 | 0.805 | 0.573 | 3.10E-263 | Proximal Tubule-3 | Dnajc12     |
| 7.07E-264 | 0.51 | 0.865 | 0.666 | 2.19E-259 | Proximal Tubule-3 | Cryz        |
| 1.64E-257 | 0.57 | 0.693 | 0.434 | 5.07E-253 | Proximal Tubule-3 | Apom        |
| 0.00E+00  | 0.97 | 0.782 | 0.299 | 0.00E+00  | Proximal Tubule-4 | Slc5a2      |
| 0.00E+00  | 0.95 | 0.834 | 0.412 | 0.00E+00  | Proximal Tubule-4 | Spp2        |
| 0.00E+00  | 0.85 | 1     | 0.985 | 0.00E+00  | Proximal Tubule-4 | Gpx3        |
| 0.00E+00  | 0.84 | 0.915 | 0.471 | 0.00E+00  | Proximal Tubule-4 | Gatm        |
| 0.00E+00  | 0.77 | 0.913 | 0.63  | 0.00E+00  | Proximal Tubule-4 | Asl         |
| 0.00E+00  | 0.74 | 0.896 | 0.595 | 0.00E+00  | Proximal Tubule-4 | Gsta2       |
| 0.00E+00  | 0.71 | 0.706 | 0.319 | 0.00E+00  | Proximal Tubule-4 | Clec2h      |
| 0.00E+00  | 0.67 | 0.991 | 0.801 | 0.00E+00  | Proximal Tubule-4 | Ass1        |
| 0.00E+00  | 0.66 | 0.752 | 0.398 | 0.00E+00  | Proximal Tubule-4 | Slc6a19     |
| 0.00E+00  | 0.63 | 0.755 | 0.437 | 0.00E+00  | Proximal Tubule-4 | Slc7a7      |
| 0.00E+00  | 0.60 | 0.681 | 0.318 | 0.00E+00  | Proximal Tubule-4 | Cyp24a1     |
| 0.00E+00  | 0.59 | 0.734 | 0.255 | 0.00E+00  | Proximal Tubule-4 | Slc5a12     |
| 0.00E+00  | 0.57 | 0.841 | 0.513 | 0.00E+00  | Proximal Tubule-4 | Nox4        |
| 0.00E+00  | 0.55 | 0.93  | 0.784 | 0.00E+00  | Proximal Tubule-4 | Lgmn        |
| 0.00E+00  | 0.53 | 0.774 | 0.405 | 0.00E+00  | Proximal Tubule-4 | Gldc        |
| 6.88E-308 | 0.54 | 0.968 | 0.881 | 2.13E-303 | Proximal Tubule-4 | Mif         |
| 2.50E-306 | 0.50 | 1     | 1     | 7.75E-302 | Proximal Tubule-4 | mt-Nd2      |
| 1.47E-295 | 0.56 | 0.794 | 0.539 | 4.55E-291 | Proximal Tubule-4 | Alpl        |
| 9.44E-274 | 0.50 | 0.931 | 0.698 | 2.93E-269 | Proximal Tubule-4 | Igfbp4      |
| 9.93E-271 | 0.56 | 0.966 | 0.706 | 3.08E-266 | Proximal Tubule-4 | Fbp1        |
| 9.78E-257 | 0.64 | 0.617 | 0.315 | 3.03E-252 | Proximal Tubule-4 | Cyp2d12     |
| 4.64E-252 | 0.52 | 0.991 | 0.759 | 1.44E-247 | Proximal Tubule-4 | Miox        |
| 9.16E-251 | 0.54 | 0.644 | 0.352 | 2.84E-246 | Proximal Tubule-4 | Cyp2d26     |
| 2.30E-215 | 0.50 | 0.825 | 0.577 | 7.11E-211 | Proximal Tubule-4 | Dnase1      |
| 1.70E-206 | 0.51 | 0.73  | 0.504 | 5.27E-202 | Proximal Tubule-4 | Cela1       |
| 0.00E+00  | 1.23 | 0.972 | 0.609 | 0.00E+00  | Proximal Tubule-5 | Cyp4a14     |
| 0.00E+00  | 0.84 | 0.998 | 0.794 | 0.00E+00  | Proximal Tubule-5 | Pck1        |
| 0.00E+00  | 0.83 | 0.95  | 0.54  | 0.00E+00  | Proximal Tubule-5 | Slc22a8     |

|           |      |       |       |           |                   |             |
|-----------|------|-------|-------|-----------|-------------------|-------------|
| 0.00E+00  | 0.81 | 0.982 | 0.676 | 0.00E+00  | Proximal Tubule-5 | Cyp4a10     |
| 0.00E+00  | 0.73 | 0.93  | 0.506 | 0.00E+00  | Proximal Tubule-5 | Slc13a3     |
| 0.00E+00  | 0.70 | 0.964 | 0.664 | 0.00E+00  | Proximal Tubule-5 | Ehhadh      |
| 0.00E+00  | 0.68 | 0.978 | 0.685 | 0.00E+00  | Proximal Tubule-5 | Hmgcs2      |
| 0.00E+00  | 0.68 | 0.979 | 0.626 | 0.00E+00  | Proximal Tubule-5 | Slc13a1     |
| 0.00E+00  | 0.65 | 0.967 | 0.767 | 0.00E+00  | Proximal Tubule-5 | Cat         |
| 0.00E+00  | 0.62 | 0.99  | 0.801 | 0.00E+00  | Proximal Tubule-5 | Acox1       |
| 0.00E+00  | 0.59 | 0.923 | 0.563 | 0.00E+00  | Proximal Tubule-5 | Aass        |
| 0.00E+00  | 0.59 | 0.682 | 0.238 | 0.00E+00  | Proximal Tubule-5 | Gm45792     |
| 0.00E+00  | 0.59 | 0.954 | 0.578 | 0.00E+00  | Proximal Tubule-5 | Cyp4a31     |
| 0.00E+00  | 0.58 | 0.963 | 0.582 | 0.00E+00  | Proximal Tubule-5 | Cyp2e1      |
| 0.00E+00  | 0.56 | 0.991 | 0.707 | 0.00E+00  | Proximal Tubule-5 | Slc4a4      |
| 0.00E+00  | 0.55 | 0.71  | 0.322 | 0.00E+00  | Proximal Tubule-5 | Slc5a10     |
| 0.00E+00  | 0.55 | 0.985 | 0.662 | 0.00E+00  | Proximal Tubule-5 | Acaa1b      |
| 0.00E+00  | 0.54 | 0.981 | 0.66  | 0.00E+00  | Proximal Tubule-5 | Lrp2        |
| 0.00E+00  | 0.52 | 0.988 | 0.755 | 0.00E+00  | Proximal Tubule-5 | Errfi1      |
| 0.00E+00  | 0.51 | 0.997 | 0.755 | 0.00E+00  | Proximal Tubule-5 | Slc27a2     |
| 0.00E+00  | 0.50 | 0.967 | 0.619 | 0.00E+00  | Proximal Tubule-5 | Slc22a12    |
| 9.61E-305 | 0.51 | 0.739 | 0.356 | 2.98E-300 | Proximal Tubule-5 | Rdh16f2     |
| 3.73E-279 | 0.50 | 0.994 | 0.762 | 1.16E-274 | Proximal Tubule-5 | Miox        |
| 1.48E-211 | 0.50 | 0.891 | 0.695 | 4.59E-207 | Proximal Tubule-5 | Abcd3       |
| 4.98E-204 | 0.52 | 0.856 | 0.589 | 1.54E-199 | Proximal Tubule-5 | Plin2       |
| 1.56E-95  | 0.54 | 0.698 | 0.543 | 4.82E-91  | Proximal Tubule-5 | Cbr1        |
| 0.00E+00  | 1.60 | 0.999 | 0.766 | 0.00E+00  | Proximal Tubule-6 | Jun         |
| 0.00E+00  | 1.57 | 0.903 | 0.313 | 0.00E+00  | Proximal Tubule-6 | Osgin1      |
| 0.00E+00  | 1.47 | 0.981 | 0.605 | 0.00E+00  | Proximal Tubule-6 | Dusp1       |
| 0.00E+00  | 1.44 | 0.608 | 0.156 | 0.00E+00  | Proximal Tubule-6 | Gm15441     |
| 0.00E+00  | 1.38 | 0.971 | 0.456 | 0.00E+00  | Proximal Tubule-6 | Angptl4     |
| 0.00E+00  | 1.34 | 0.935 | 0.254 | 0.00E+00  | Proximal Tubule-6 | Gm45792     |
| 0.00E+00  | 1.32 | 0.97  | 0.53  | 0.00E+00  | Proximal Tubule-6 | Slc25a25    |
| 0.00E+00  | 1.24 | 0.985 | 0.605 | 0.00E+00  | Proximal Tubule-6 | Brd2        |
| 0.00E+00  | 1.22 | 0.981 | 0.613 | 0.00E+00  | Proximal Tubule-6 | Tmem252     |
| 0.00E+00  | 1.15 | 0.992 | 0.745 | 0.00E+00  | Proximal Tubule-6 | Mat2a       |
| 0.00E+00  | 1.09 | 0.886 | 0.359 | 0.00E+00  | Proximal Tubule-6 | Pdk4        |
| 0.00E+00  | 1.07 | 0.987 | 0.718 | 0.00E+00  | Proximal Tubule-6 | Pim3        |
| 0.00E+00  | 1.06 | 0.991 | 0.797 | 0.00E+00  | Proximal Tubule-6 | Rsrp1       |
| 0.00E+00  | 1.06 | 0.971 | 0.564 | 0.00E+00  | Proximal Tubule-6 | Tob1        |
| 0.00E+00  | 1.04 | 0.998 | 0.768 | 0.00E+00  | Proximal Tubule-6 | Errfi1      |
| 0.00E+00  | 1.03 | 0.996 | 0.68  | 0.00E+00  | Proximal Tubule-6 | Acaa1b      |
| 0.00E+00  | 1.01 | 0.891 | 0.333 | 0.00E+00  | Proximal Tubule-6 | Ppp1r10     |
| 0.00E+00  | 1.01 | 0.991 | 0.694 | 0.00E+00  | Proximal Tubule-6 | Srsf2       |
| 0.00E+00  | 0.94 | 0.838 | 0.28  | 0.00E+00  | Proximal Tubule-6 | Slc7a13     |
| 0.00E+00  | 0.91 | 0.876 | 0.305 | 0.00E+00  | Proximal Tubule-6 | Slc22a30    |
| 0.00E+00  | 0.89 | 0.991 | 0.502 | 0.00E+00  | Proximal Tubule-6 | Slc22a6     |
| 0.00E+00  | 0.86 | 0.837 | 0.321 | 0.00E+00  | Proximal Tubule-6 | Gm43323     |
| 0.00E+00  | 0.86 | 0.785 | 0.214 | 0.00E+00  | Proximal Tubule-6 | Nat8f6      |
| 0.00E+00  | 0.85 | 0.999 | 0.975 | 0.00E+00  | Proximal Tubule-6 | Ubc         |
| 0.00E+00  | 0.84 | 0.789 | 0.252 | 0.00E+00  | Proximal Tubule-6 | 031425E22Ri |
| 0.00E+00  | 0.82 | 0.931 | 0.451 | 0.00E+00  | Proximal Tubule-6 | Thoc2l      |
| 0.00E+00  | 0.62 | 0.841 | 0.29  | 0.00E+00  | Proximal Tubule-6 | Trim7       |
| 2.20E-302 | 1.09 | 0.999 | 0.735 | 6.81E-298 | Proximal Tubule-6 | Neat1       |
| 5.17E-301 | 1.35 | 0.955 | 0.61  | 1.60E-296 | Proximal Tubule-6 | Cited2      |
| 5.35E-301 | 0.78 | 0.957 | 0.48  | 1.66E-296 | Proximal Tubule-6 | Slc17a3     |
| 5.12E-300 | 0.82 | 0.998 | 0.804 | 1.59E-295 | Proximal Tubule-6 | Zbtb20      |
| 2.98E-298 | 1.15 | 0.866 | 0.398 | 9.22E-294 | Proximal Tubule-6 | Hbegf       |
| 1.06E-297 | 1.29 | 0.855 | 0.423 | 3.28E-293 | Proximal Tubule-6 | Ccn1        |
| 6.71E-293 | 0.57 | 0.758 | 0.255 | 2.08E-288 | Proximal Tubule-6 | Pde4d       |
| 7.19E-293 | 0.89 | 0.997 | 0.848 | 2.23E-288 | Proximal Tubule-6 | Jund        |
| 7.03E-290 | 0.85 | 0.989 | 0.598 | 2.18E-285 | Proximal Tubule-6 | Cyp4a31     |
| 1.31E-287 | 0.83 | 0.999 | 0.769 | 4.06E-283 | Proximal Tubule-6 | Slc27a2     |
| 3.05E-287 | 0.78 | 0.909 | 0.463 | 9.45E-283 | Proximal Tubule-6 | Alas1       |
| 1.35E-285 | 0.63 | 0.857 | 0.337 | 4.19E-281 | Proximal Tubule-6 | Snx29       |
| 3.90E-284 | 0.84 | 0.961 | 0.539 | 1.21E-279 | Proximal Tubule-6 | Srsf7       |
| 6.24E-284 | 0.54 | 0.751 | 0.263 | 1.93E-279 | Proximal Tubule-6 | Slc25a42    |

|           |      |       |       |           |                   |             |
|-----------|------|-------|-------|-----------|-------------------|-------------|
| 9.39E-283 | 0.64 | 0.875 | 0.328 | 2.91E-278 | Proximal Tubule-6 | Slc6a18     |
| 1.26E-282 | 0.97 | 0.824 | 0.3   | 3.90E-278 | Proximal Tubule-6 | Cyp2a4      |
| 8.16E-280 | 0.59 | 0.843 | 0.288 | 2.53E-275 | Proximal Tubule-6 | Slc5a8      |
| 1.68E-279 | 0.58 | 0.801 | 0.292 | 5.20E-275 | Proximal Tubule-6 | 632427E13Ri |
| 1.56E-275 | 0.75 | 0.982 | 0.582 | 4.84E-271 | Proximal Tubule-6 | Gm19950     |
| 4.36E-270 | 0.88 | 0.951 | 0.515 | 1.35E-265 | Proximal Tubule-6 | Hao2        |
| 3.18E-269 | 0.83 | 0.951 | 0.611 | 9.85E-265 | Proximal Tubule-6 | Tubb4b      |
| 1.45E-265 | 0.70 | 0.999 | 0.903 | 4.49E-261 | Proximal Tubule-6 | Ddx5        |
| 5.34E-263 | 0.84 | 0.988 | 0.713 | 1.65E-258 | Proximal Tubule-6 | Gstt2       |
| 5.89E-263 | 0.91 | 1     | 0.995 | 1.83E-258 | Proximal Tubule-6 | Malat1      |
| 1.11E-262 | 1.52 | 0.917 | 0.547 | 3.45E-258 | Proximal Tubule-6 | Gadd45g     |
| 2.64E-260 | 0.53 | 0.766 | 0.259 | 8.16E-256 | Proximal Tubule-6 | Mogat1      |
| 4.25E-260 | 0.76 | 0.884 | 0.4   | 1.32E-255 | Proximal Tubule-6 | Rhob        |
| 6.09E-260 | 0.81 | 0.97  | 0.663 | 1.89E-255 | Proximal Tubule-6 | Sephs2      |
| 1.33E-258 | 0.59 | 0.872 | 0.352 | 4.13E-254 | Proximal Tubule-6 | Mlxipl      |
| 2.53E-256 | 0.60 | 0.92  | 0.411 | 7.83E-252 | Proximal Tubule-6 | Slc22a2     |
| 2.16E-253 | 0.73 | 0.992 | 0.639 | 6.68E-249 | Proximal Tubule-6 | Slc22a12    |
| 2.38E-252 | 0.61 | 0.67  | 0.232 | 7.37E-248 | Proximal Tubule-6 | Nr1d1       |
| 1.11E-251 | 0.59 | 0.87  | 0.402 | 3.45E-247 | Proximal Tubule-6 | Pex11a      |
| 2.84E-251 | 0.72 | 0.897 | 0.457 | 8.78E-247 | Proximal Tubule-6 | Aspa        |
| 2.13E-250 | 0.60 | 0.972 | 0.581 | 6.59E-246 | Proximal Tubule-6 | Napsa       |
| 2.51E-250 | 0.50 | 0.711 | 0.226 | 7.76E-246 | Proximal Tubule-6 | Azgp1       |
| 3.59E-248 | 0.68 | 0.892 | 0.438 | 1.11E-243 | Proximal Tubule-6 | Mettl7b     |
| 9.84E-248 | 0.86 | 0.994 | 0.874 | 3.05E-243 | Proximal Tubule-6 | Hsp90aa1    |
| 4.71E-246 | 0.66 | 0.959 | 0.537 | 1.46E-241 | Proximal Tubule-6 | Slc47a1     |
| 9.63E-243 | 0.61 | 0.889 | 0.373 | 2.98E-238 | Proximal Tubule-6 | Rdh16f2     |
| 1.32E-242 | 0.68 | 0.962 | 0.52  | 4.10E-238 | Proximal Tubule-6 | Abcc2       |
| 2.28E-235 | 0.80 | 0.966 | 0.665 | 7.07E-231 | Proximal Tubule-6 | Nudt19      |
| 8.34E-235 | 0.66 | 0.948 | 0.445 | 2.58E-230 | Proximal Tubule-6 | Ces1f       |
| 2.35E-234 | 0.74 | 0.992 | 0.694 | 7.28E-230 | Proximal Tubule-6 | Cyp4a10     |
| 3.57E-233 | 0.71 | 0.818 | 0.377 | 1.11E-228 | Proximal Tubule-6 | Arrdc3      |
| 5.43E-230 | 0.54 | 0.82  | 0.344 | 1.68E-225 | Proximal Tubule-6 | BC024386    |
| 1.85E-228 | 0.80 | 0.944 | 0.655 | 5.73E-224 | Proximal Tubule-6 | BC005537    |
| 2.43E-226 | 0.64 | 0.917 | 0.445 | 7.54E-222 | Proximal Tubule-6 | Nat8        |
| 3.04E-224 | 0.75 | 0.965 | 0.629 | 9.43E-220 | Proximal Tubule-6 | Acy3        |
| 3.68E-224 | 0.52 | 0.885 | 0.422 | 1.14E-219 | Proximal Tubule-6 | Slc6a20b    |
| 5.90E-224 | 0.67 | 0.965 | 0.604 | 1.83E-219 | Proximal Tubule-6 | Pecr        |
| 1.74E-222 | 0.69 | 0.991 | 0.63  | 5.38E-218 | Proximal Tubule-6 | Cyp4a14     |
| 4.24E-221 | 0.70 | 0.958 | 0.575 | 1.31E-216 | Proximal Tubule-6 | Nat8f1      |
| 4.81E-221 | 0.86 | 1     | 0.99  | 1.49E-216 | Proximal Tubule-6 | Kap         |
| 6.56E-221 | 0.59 | 0.918 | 0.45  | 2.03E-216 | Proximal Tubule-6 | Ces2c       |
| 7.38E-221 | 0.61 | 0.934 | 0.529 | 2.29E-216 | Proximal Tubule-6 | Hyi         |
| 1.21E-219 | 0.61 | 0.997 | 0.914 | 3.76E-215 | Proximal Tubule-6 | Chpt1       |
| 5.46E-219 | 0.63 | 0.978 | 0.592 | 1.69E-214 | Proximal Tubule-6 | Slc17a1     |
| 6.49E-219 | 0.71 | 0.986 | 0.717 | 2.01E-214 | Proximal Tubule-6 | Akr1c21     |
| 1.87E-218 | 0.72 | 0.955 | 0.617 | 5.79E-214 | Proximal Tubule-6 | Cndp2       |
| 4.09E-218 | 0.56 | 0.991 | 0.848 | 1.27E-213 | Proximal Tubule-6 | Eif5        |
| 1.22E-217 | 0.54 | 0.909 | 0.457 | 3.79E-213 | Proximal Tubule-6 | Xylb        |
| 2.67E-217 | 0.76 | 0.857 | 0.453 | 8.27E-213 | Proximal Tubule-6 | Hmgb2       |
| 3.39E-217 | 0.54 | 0.903 | 0.44  | 1.05E-212 | Proximal Tubule-6 | Adtrp       |
| 2.26E-216 | 0.67 | 0.944 | 0.615 | 7.00E-212 | Proximal Tubule-6 | Galnt11     |
| 1.53E-215 | 0.71 | 0.97  | 0.744 | 4.73E-211 | Proximal Tubule-6 | Dnaja1      |
| 3.75E-215 | 0.70 | 0.984 | 0.662 | 1.16E-210 | Proximal Tubule-6 | Keg1        |
| 2.78E-214 | 0.54 | 0.757 | 0.309 | 8.60E-210 | Proximal Tubule-6 | Kcnk5       |
| 4.63E-213 | 0.64 | 0.971 | 0.763 | 1.43E-208 | Proximal Tubule-6 | Sqstm1      |
| 1.80E-212 | 0.60 | 0.968 | 0.676 | 5.56E-208 | Proximal Tubule-6 | Aldh9a1     |
| 2.00E-212 | 0.67 | 0.916 | 0.542 | 6.19E-208 | Proximal Tubule-6 | Hnrnp1      |
| 1.94E-211 | 0.55 | 0.882 | 0.462 | 6.00E-207 | Proximal Tubule-6 | Tprkb       |
| 1.21E-210 | 0.56 | 0.826 | 0.408 | 3.75E-206 | Proximal Tubule-6 | Slc25a20    |
| 1.47E-210 | 0.65 | 0.943 | 0.578 | 4.56E-206 | Proximal Tubule-6 | Clk1        |
| 9.13E-210 | 0.53 | 0.843 | 0.379 | 2.83E-205 | Proximal Tubule-6 | 630029K05Ri |
| 1.14E-206 | 0.85 | 0.971 | 0.763 | 3.52E-202 | Proximal Tubule-6 | Tsc22d1     |
| 1.49E-206 | 0.58 | 0.928 | 0.584 | 4.63E-202 | Proximal Tubule-6 | Psm1d7      |
| 1.71E-206 | 0.60 | 0.88  | 0.458 | 5.29E-202 | Proximal Tubule-6 | Taf1d       |

|           |      |       |       |           |                   |          |
|-----------|------|-------|-------|-----------|-------------------|----------|
| 2.88E-206 | 0.69 | 0.98  | 0.751 | 8.93E-202 | Proximal Tubule-6 | Herpud1  |
| 4.09E-206 | 0.59 | 0.904 | 0.416 | 1.27E-201 | Proximal Tubule-6 | Tmigd1   |
| 6.76E-205 | 0.52 | 0.923 | 0.447 | 2.09E-200 | Proximal Tubule-6 | Ugt3a1   |
| 1.70E-204 | 0.61 | 0.965 | 0.563 | 5.26E-200 | Proximal Tubule-6 | Mep1a    |
| 1.79E-204 | 0.58 | 0.89  | 0.483 | 5.55E-200 | Proximal Tubule-6 | Csad     |
| 3.30E-203 | 0.58 | 0.962 | 0.655 | 1.02E-198 | Proximal Tubule-6 | Dhrs4    |
| 1.29E-201 | 0.64 | 0.997 | 0.959 | 4.00E-197 | Proximal Tubule-6 | Gpx1     |
| 2.24E-201 | 0.52 | 0.925 | 0.521 | 6.94E-197 | Proximal Tubule-6 | Hoga1    |
| 6.47E-199 | 0.59 | 0.967 | 0.586 | 2.00E-194 | Proximal Tubule-6 | Ugt3a2   |
| 8.39E-199 | 0.57 | 0.847 | 0.424 | 2.60E-194 | Proximal Tubule-6 | Nufip2   |
| 1.79E-198 | 0.55 | 0.891 | 0.504 | 5.55E-194 | Proximal Tubule-6 | Vegfa    |
| 2.30E-198 | 0.59 | 0.862 | 0.469 | 7.12E-194 | Proximal Tubule-6 | Snhg12   |
| 3.08E-198 | 0.69 | 0.963 | 0.607 | 9.53E-194 | Proximal Tubule-6 | Inmt     |
| 1.27E-197 | 0.71 | 1     | 0.806 | 3.94E-193 | Proximal Tubule-6 | Pck1     |
| 1.57E-197 | 0.56 | 0.734 | 0.287 | 4.86E-193 | Proximal Tubule-6 | Ier5     |
| 2.45E-197 | 0.55 | 0.892 | 0.46  | 7.60E-193 | Proximal Tubule-6 | Vnn1     |
| 3.36E-197 | 0.61 | 0.971 | 0.685 | 1.04E-192 | Proximal Tubule-6 | Acot1    |
| 1.18E-196 | 0.59 | 0.932 | 0.581 | 3.64E-192 | Proximal Tubule-6 | Atf4     |
| 7.82E-195 | 0.55 | 0.971 | 0.583 | 2.42E-190 | Proximal Tubule-6 | Aldh8a1  |
| 4.40E-194 | 0.59 | 0.942 | 0.575 | 1.36E-189 | Proximal Tubule-6 | Tra2b    |
| 6.04E-194 | 0.60 | 0.865 | 0.398 | 1.87E-189 | Proximal Tubule-6 | Cyp2d9   |
| 6.94E-192 | 0.57 | 0.905 | 0.516 | 2.15E-187 | Proximal Tubule-6 | Rsrc2    |
| 3.22E-190 | 0.56 | 0.959 | 0.636 | 9.99E-186 | Proximal Tubule-6 | Pank1    |
| 3.28E-190 | 0.66 | 0.633 | 0.242 | 1.02E-185 | Proximal Tubule-6 | Rn7sk    |
| 1.81E-188 | 0.62 | 0.968 | 0.715 | 5.59E-184 | Proximal Tubule-6 | Pnrc1    |
| 5.91E-188 | 0.53 | 0.984 | 0.806 | 1.83E-183 | Proximal Tubule-6 | Hspd1    |
| 1.95E-187 | 0.56 | 0.855 | 0.452 | 6.04E-183 | Proximal Tubule-6 | Amacr    |
| 2.79E-187 | 0.54 | 0.945 | 0.569 | 8.63E-183 | Proximal Tubule-6 | Cryz12   |
| 4.78E-187 | 0.57 | 0.969 | 0.529 | 1.48E-182 | Proximal Tubule-6 | Slc13a3  |
| 9.27E-186 | 0.54 | 0.93  | 0.564 | 2.87E-181 | Proximal Tubule-6 | Cebpb    |
| 6.08E-185 | 0.52 | 0.934 | 0.489 | 1.88E-180 | Proximal Tubule-6 | Eci3     |
| 6.95E-184 | 0.53 | 0.874 | 0.474 | 2.15E-179 | Proximal Tubule-6 | Mafg     |
| 2.83E-183 | 0.54 | 0.919 | 0.553 | 8.75E-179 | Proximal Tubule-6 | Pbld1    |
| 3.13E-183 | 0.53 | 0.867 | 0.438 | 9.69E-179 | Proximal Tubule-6 | Gm47283  |
| 6.56E-182 | 0.54 | 0.835 | 0.446 | 2.03E-177 | Proximal Tubule-6 | Hexim1   |
| 1.57E-181 | 0.60 | 0.919 | 0.566 | 4.86E-177 | Proximal Tubule-6 | Vmp1     |
| 1.75E-181 | 0.72 | 0.952 | 0.709 | 5.43E-177 | Proximal Tubule-6 | Dynll1   |
| 2.72E-180 | 0.53 | 0.8   | 0.377 | 8.44E-176 | Proximal Tubule-6 | Polr3e   |
| 6.22E-180 | 0.55 | 0.946 | 0.577 | 1.93E-175 | Proximal Tubule-6 | Ldhd     |
| 1.72E-179 | 0.61 | 0.965 | 0.638 | 5.34E-175 | Proximal Tubule-6 | Guca2b   |
| 1.78E-179 | 0.54 | 0.955 | 0.694 | 5.51E-175 | Proximal Tubule-6 | Csrp2    |
| 3.35E-178 | 0.59 | 0.931 | 0.595 | 1.04E-173 | Proximal Tubule-6 | Crot     |
| 1.25E-177 | 0.51 | 1     | 0.997 | 3.89E-173 | Proximal Tubule-6 | Ftl1     |
| 7.10E-175 | 0.60 | 0.803 | 0.404 | 2.20E-170 | Proximal Tubule-6 | Nabp1    |
| 1.06E-174 | 0.54 | 0.989 | 0.91  | 3.29E-170 | Proximal Tubule-6 | Cyb5a    |
| 2.01E-174 | 0.83 | 0.837 | 0.438 | 6.22E-170 | Proximal Tubule-6 | G0s2     |
| 1.86E-173 | 0.59 | 0.855 | 0.479 | 5.75E-169 | Proximal Tubule-6 | Tob2     |
| 3.47E-172 | 0.53 | 0.961 | 0.579 | 1.07E-167 | Proximal Tubule-6 | Mfsd4b5  |
| 9.12E-172 | 0.90 | 0.703 | 0.302 | 2.83E-167 | Proximal Tubule-6 | Gdf15    |
| 9.11E-170 | 0.59 | 0.994 | 0.794 | 2.82E-165 | Proximal Tubule-6 | Cyp4b1   |
| 1.92E-169 | 0.61 | 0.952 | 0.631 | 5.94E-165 | Proximal Tubule-6 | Slc25a30 |
| 8.03E-169 | 0.78 | 0.872 | 0.471 | 2.49E-164 | Proximal Tubule-6 | Btg2     |
| 1.50E-168 | 0.87 | 0.891 | 0.539 | 4.65E-164 | Proximal Tubule-6 | Sgk1     |
| 4.85E-168 | 0.59 | 0.902 | 0.575 | 1.50E-163 | Proximal Tubule-6 | Zfand5   |
| 3.02E-166 | 0.54 | 0.996 | 0.812 | 9.36E-162 | Proximal Tubule-6 | Acox1    |
| 2.24E-165 | 0.51 | 0.959 | 0.679 | 6.95E-161 | Proximal Tubule-6 | Srsf5    |
| 4.13E-165 | 0.51 | 0.933 | 0.615 | 1.28E-160 | Proximal Tubule-6 | Srsf3    |
| 5.85E-165 | 0.53 | 0.726 | 0.345 | 1.81E-160 | Proximal Tubule-6 | Dnajb4   |
| 7.49E-165 | 0.53 | 0.97  | 0.662 | 2.32E-160 | Proximal Tubule-6 | Cda      |
| 1.18E-164 | 0.51 | 0.969 | 0.717 | 3.65E-160 | Proximal Tubule-6 | Gclm     |
| 1.33E-162 | 0.65 | 0.812 | 0.459 | 4.11E-158 | Proximal Tubule-6 | Dnajb9   |
| 2.17E-162 | 0.52 | 0.984 | 0.703 | 6.71E-158 | Proximal Tubule-6 | Neu1     |
| 6.47E-161 | 0.52 | 0.992 | 0.716 | 2.00E-156 | Proximal Tubule-6 | Ggt1     |
| 3.48E-158 | 0.54 | 0.992 | 0.807 | 1.08E-153 | Proximal Tubule-6 | Ttc36    |



|           |      |       |       |           |                   |           |
|-----------|------|-------|-------|-----------|-------------------|-----------|
| 6.91E-158 | 0.53 | 0.974 | 0.604 | 2.14E-153 | Proximal Tubule-6 | Cyp2e1    |
| 1.00E-157 | 0.62 | 0.81  | 0.445 | 3.10E-153 | Proximal Tubule-6 | Med21     |
| 2.11E-152 | 0.67 | 0.717 | 0.326 | 6.53E-148 | Proximal Tubule-6 | Cyp2a5    |
| 4.26E-150 | 0.50 | 0.998 | 0.862 | 1.32E-145 | Proximal Tubule-6 | Rida      |
| 1.34E-149 | 0.54 | 1     | 0.893 | 4.16E-145 | Proximal Tubule-6 | Timp3     |
| 2.00E-148 | 0.65 | 0.932 | 0.601 | 6.21E-144 | Proximal Tubule-6 | Plin2     |
| 2.21E-148 | 0.50 | 0.952 | 0.663 | 6.85E-144 | Proximal Tubule-6 | Rbm47     |
| 5.11E-147 | 0.80 | 0.933 | 0.58  | 1.58E-142 | Proximal Tubule-6 | G6pc      |
| 8.43E-138 | 0.63 | 0.746 | 0.388 | 2.61E-133 | Proximal Tubule-6 | Hmox1     |
| 7.86E-134 | 0.51 | 0.987 | 0.702 | 2.43E-129 | Proximal Tubule-6 | Hmgcs2    |
| 1.12E-133 | 0.54 | 0.919 | 0.636 | 3.47E-129 | Proximal Tubule-6 | Glul      |
| 1.10E-130 | 0.52 | 1     | 0.829 | 3.41E-126 | Proximal Tubule-6 | Slc34a1   |
| 5.13E-129 | 0.54 | 0.996 | 0.878 | 1.59E-124 | Proximal Tubule-6 | Id2       |
| 2.82E-119 | 0.51 | 0.985 | 0.646 | 8.74E-115 | Proximal Tubule-6 | Slc13a1   |
| 2.69E-99  | 0.52 | 0.748 | 0.416 | 8.33E-95  | Proximal Tubule-6 | Resf1     |
| 1.89E-91  | 0.58 | 0.728 | 0.435 | 5.86E-87  | Proximal Tubule-6 | Id1       |
| 1.24E-87  | 0.62 | 0.634 | 0.356 | 3.86E-83  | Proximal Tubule-6 | Rcan1     |
| 9.83E-64  | 0.53 | 0.884 | 0.695 | 3.04E-59  | Proximal Tubule-6 | Txnip     |
| 0.00E+00  | 2.91 | 1     | 0.586 | 0.00E+00  | Proximal Tubule-7 | Napsa     |
| 0.00E+00  | 2.28 | 0.943 | 0.422 | 0.00E+00  | Proximal Tubule-7 | Aadat     |
| 0.00E+00  | 2.07 | 0.953 | 0.388 | 0.00E+00  | Proximal Tubule-7 | Mpv17l    |
| 0.00E+00  | 1.85 | 0.83  | 0.05  | 0.00E+00  | Proximal Tubule-7 | Scd1      |
| 0.00E+00  | 1.84 | 0.884 | 0.007 | 0.00E+00  | Proximal Tubule-7 | Serpina1f |
| 0.00E+00  | 1.79 | 0.874 | 0.043 | 0.00E+00  | Proximal Tubule-7 | Slc22a7   |
| 0.00E+00  | 1.62 | 0.984 | 0.568 | 0.00E+00  | Proximal Tubule-7 | Mep1a     |
| 0.00E+00  | 1.62 | 0.99  | 0.852 | 0.00E+00  | Proximal Tubule-7 | Acadm     |
| 0.00E+00  | 1.62 | 0.978 | 0.633 | 0.00E+00  | Proximal Tubule-7 | Ghr       |
| 0.00E+00  | 1.56 | 0.926 | 0.305 | 0.00E+00  | Proximal Tubule-7 | Cyp2a4    |
| 0.00E+00  | 1.55 | 0.955 | 0.334 | 0.00E+00  | Proximal Tubule-7 | Slc6a18   |
| 0.00E+00  | 1.52 | 0.905 | 0.026 | 0.00E+00  | Proximal Tubule-7 | Slc22a13  |
| 0.00E+00  | 1.51 | 0.645 | 0.013 | 0.00E+00  | Proximal Tubule-7 | Serpina1d |
| 0.00E+00  | 1.44 | 0.875 | 0.047 | 0.00E+00  | Proximal Tubule-7 | Mep1b     |
| 0.00E+00  | 1.43 | 0.934 | 0.24  | 0.00E+00  | Proximal Tubule-7 | Cyp51     |
| 0.00E+00  | 1.40 | 0.817 | 0.014 | 0.00E+00  | Proximal Tubule-7 | Mettl7a2  |
| 0.00E+00  | 1.39 | 0.922 | 0.369 | 0.00E+00  | Proximal Tubule-7 | Slc23a1   |
| 0.00E+00  | 1.27 | 0.849 | 0.025 | 0.00E+00  | Proximal Tubule-7 | Slc22a19  |
| 0.00E+00  | 1.26 | 0.737 | 0.159 | 0.00E+00  | Proximal Tubule-7 | Kcnk1     |
| 0.00E+00  | 1.26 | 0.875 | 0.178 | 0.00E+00  | Proximal Tubule-7 | Ppic      |
| 0.00E+00  | 1.21 | 0.792 | 0.105 | 0.00E+00  | Proximal Tubule-7 | Apoc3     |
| 0.00E+00  | 1.19 | 0.841 | 0.152 | 0.00E+00  | Proximal Tubule-7 | Akr1c14   |
| 0.00E+00  | 1.04 | 0.602 | 0.027 | 0.00E+00  | Proximal Tubule-7 | Cp        |
| 0.00E+00  | 1.02 | 0.825 | 0.178 | 0.00E+00  | Proximal Tubule-7 | Gpm6a     |
| 0.00E+00  | 1.01 | 0.723 | 0.005 | 0.00E+00  | Proximal Tubule-7 | Methig1   |
| 0.00E+00  | 0.98 | 0.849 | 0.186 | 0.00E+00  | Proximal Tubule-7 | Bdh1      |
| 0.00E+00  | 0.95 | 0.832 | 0.232 | 0.00E+00  | Proximal Tubule-7 | Mme       |
| 0.00E+00  | 0.91 | 0.815 | 0.158 | 0.00E+00  | Proximal Tubule-7 | Agt       |
| 0.00E+00  | 0.82 | 0.782 | 0.15  | 0.00E+00  | Proximal Tubule-7 | Ace       |
| 0.00E+00  | 0.81 | 0.715 | 0.134 | 0.00E+00  | Proximal Tubule-7 | Slc10a2   |
| 0.00E+00  | 0.76 | 0.734 | 0.088 | 0.00E+00  | Proximal Tubule-7 | Slc39a8   |
| 0.00E+00  | 0.67 | 0.732 | 0.166 | 0.00E+00  | Proximal Tubule-7 | BC035947  |
| 0.00E+00  | 0.58 | 0.652 | 0.119 | 0.00E+00  | Proximal Tubule-7 | Slc38a3   |
| 6.64E-303 | 1.34 | 0.825 | 0.234 | 2.06E-298 | Proximal Tubule-7 | Cryab     |
| 2.21E-291 | 1.26 | 0.915 | 0.391 | 6.85E-287 | Proximal Tubule-7 | Atp11a    |
| 1.95E-290 | 0.86 | 0.782 | 0.218 | 6.04E-286 | Proximal Tubule-7 | Kyat3     |
| 8.09E-290 | 1.07 | 0.898 | 0.294 | 2.51E-285 | Proximal Tubule-7 | Slc5a8    |
| 3.33E-284 | 0.75 | 0.77  | 0.202 | 1.03E-279 | Proximal Tubule-7 | Id4       |
| 2.06E-283 | 1.16 | 0.965 | 0.545 | 6.39E-279 | Proximal Tubule-7 | Slc3a1    |
| 1.25E-280 | 1.34 | 0.99  | 0.76  | 3.88E-276 | Proximal Tubule-7 | Gstm1     |
| 5.88E-276 | 1.09 | 1     | 0.915 | 1.82E-271 | Proximal Tubule-7 | Chpt1     |
| 3.08E-275 | 1.33 | 0.967 | 0.598 | 9.53E-271 | Proximal Tubule-7 | Crot      |
| 8.40E-275 | 0.99 | 0.886 | 0.309 | 2.60E-270 | Proximal Tubule-7 | Cdo1      |
| 1.74E-272 | 1.21 | 0.95  | 0.453 | 5.38E-268 | Proximal Tubule-7 | Ugt3a1    |
| 7.84E-267 | 1.15 | 0.939 | 0.488 | 2.43E-262 | Proximal Tubule-7 | Csad      |
| 2.03E-253 | 1.17 | 0.995 | 0.772 | 6.28E-249 | Proximal Tubule-7 | Slc27a2   |

|           |      |       |       |           |                   |          |
|-----------|------|-------|-------|-----------|-------------------|----------|
| 1.91E-247 | 0.91 | 0.735 | 0.227 | 5.91E-243 | Proximal Tubule-7 | Gramd1b  |
| 4.27E-247 | 0.74 | 0.765 | 0.24  | 1.32E-242 | Proximal Tubule-7 | Slc6a13  |
| 7.02E-246 | 1.09 | 0.981 | 0.721 | 2.18E-241 | Proximal Tubule-7 | Gclm     |
| 4.06E-245 | 1.15 | 0.978 | 0.615 | 1.26E-240 | Proximal Tubule-7 | Gk       |
| 2.14E-237 | 0.82 | 0.801 | 0.229 | 6.62E-233 | Proximal Tubule-7 | Apob     |
| 2.39E-231 | 0.91 | 0.884 | 0.399 | 7.40E-227 | Proximal Tubule-7 | Cth      |
| 2.82E-229 | 0.69 | 0.773 | 0.246 | 8.72E-225 | Proximal Tubule-7 | Acox2    |
| 3.44E-222 | 1.17 | 0.986 | 0.633 | 1.07E-217 | Proximal Tubule-7 | Acy3     |
| 8.12E-219 | 1.10 | 0.978 | 0.668 | 2.52E-214 | Proximal Tubule-7 | Nudt19   |
| 8.59E-218 | 0.79 | 0.822 | 0.333 | 2.66E-213 | Proximal Tubule-7 | Ugdh     |
| 8.02E-216 | 0.89 | 0.882 | 0.388 | 2.48E-211 | Proximal Tubule-7 | Deffb29  |
| 1.36E-214 | 0.77 | 0.761 | 0.272 | 4.22E-210 | Proximal Tubule-7 | Slc16a9  |
| 1.78E-213 | 1.18 | 0.974 | 0.642 | 5.52E-209 | Proximal Tubule-7 | Guca2b   |
| 4.15E-212 | 0.91 | 0.894 | 0.345 | 1.29E-207 | Proximal Tubule-7 | Slc5a10  |
| 6.83E-204 | 0.99 | 0.822 | 0.357 | 2.12E-199 | Proximal Tubule-7 | Fgf1     |
| 1.92E-202 | 1.09 | 0.898 | 0.423 | 5.95E-198 | Proximal Tubule-7 | Tmigd1   |
| 1.27E-201 | 0.71 | 0.995 | 0.948 | 3.93E-197 | Proximal Tubule-7 | Tmbim6   |
| 1.02E-200 | 0.67 | 0.676 | 0.205 | 3.15E-196 | Proximal Tubule-7 | Slc16a4  |
| 2.44E-200 | 0.83 | 0.837 | 0.322 | 7.54E-196 | Proximal Tubule-7 | Cd36     |
| 6.97E-200 | 0.97 | 0.952 | 0.641 | 2.16E-195 | Proximal Tubule-7 | Pank1    |
| 1.96E-199 | 0.97 | 0.905 | 0.522 | 6.08E-195 | Proximal Tubule-7 | Nceh1    |
| 5.66E-194 | 0.67 | 0.798 | 0.309 | 1.75E-189 | Proximal Tubule-7 | Cyp2j11  |
| 7.54E-190 | 0.62 | 0.804 | 0.281 | 2.34E-185 | Proximal Tubule-7 | Bhmt2    |
| 2.08E-188 | 0.77 | 0.836 | 0.396 | 6.45E-184 | Proximal Tubule-7 | Osbp18   |
| 3.64E-188 | 0.80 | 0.898 | 0.418 | 1.13E-183 | Proximal Tubule-7 | Slc22a2  |
| 2.87E-185 | 0.89 | 0.922 | 0.524 | 8.89E-181 | Proximal Tubule-7 | Aqp1     |
| 3.92E-184 | 0.90 | 0.988 | 0.667 | 1.22E-179 | Proximal Tubule-7 | Keg1     |
| 1.03E-182 | 0.90 | 0.998 | 0.814 | 3.19E-178 | Proximal Tubule-7 | Sult1d1  |
| 3.16E-181 | 0.66 | 0.787 | 0.318 | 9.79E-177 | Proximal Tubule-7 | Agps     |
| 5.20E-181 | 0.86 | 0.965 | 0.671 | 1.61E-176 | Proximal Tubule-7 | Lap3     |
| 1.13E-178 | 0.81 | 0.917 | 0.552 | 3.49E-174 | Proximal Tubule-7 | Entpd5   |
| 2.32E-176 | 0.79 | 0.894 | 0.535 | 7.19E-172 | Proximal Tubule-7 | Lypla1   |
| 1.43E-170 | 1.13 | 0.9   | 0.522 | 4.44E-166 | Proximal Tubule-7 | Hao2     |
| 4.37E-170 | 0.59 | 0.753 | 0.291 | 1.35E-165 | Proximal Tubule-7 | Slc15a2  |
| 3.12E-165 | 0.84 | 0.896 | 0.519 | 9.68E-161 | Proximal Tubule-7 | Gcnt1    |
| 7.50E-163 | 1.53 | 0.682 | 0.291 | 2.32E-158 | Proximal Tubule-7 | Slc7a13  |
| 1.07E-162 | 0.64 | 0.656 | 0.223 | 3.32E-158 | Proximal Tubule-7 | Acy1     |
| 1.28E-161 | 0.67 | 0.76  | 0.318 | 3.97E-157 | Proximal Tubule-7 | Cbs      |
| 2.34E-158 | 0.67 | 0.846 | 0.393 | 7.24E-154 | Proximal Tubule-7 | Proc     |
| 3.01E-158 | 0.78 | 0.974 | 0.72  | 9.33E-154 | Proximal Tubule-7 | Ggt1     |
| 3.00E-156 | 1.13 | 0.924 | 0.617 | 9.29E-152 | Proximal Tubule-7 | Gclc     |
| 2.53E-155 | 0.82 | 0.924 | 0.55  | 7.82E-151 | Proximal Tubule-7 | Pter     |
| 2.76E-154 | 0.72 | 0.875 | 0.497 | 8.55E-150 | Proximal Tubule-7 | Gss      |
| 3.99E-153 | 0.61 | 0.817 | 0.416 | 1.24E-148 | Proximal Tubule-7 | Tmem19   |
| 1.68E-150 | 0.62 | 0.78  | 0.335 | 5.19E-146 | Proximal Tubule-7 | Nqo1     |
| 7.08E-149 | 0.77 | 0.998 | 0.864 | 2.19E-144 | Proximal Tubule-7 | Rida     |
| 1.30E-148 | 0.73 | 0.948 | 0.591 | 4.03E-144 | Proximal Tubule-7 | Ugt3a2   |
| 8.20E-148 | 0.65 | 0.863 | 0.479 | 2.54E-143 | Proximal Tubule-7 | Tmem189  |
| 6.48E-147 | 0.58 | 0.829 | 0.395 | 2.01E-142 | Proximal Tubule-7 | Tpmt     |
| 6.96E-146 | 0.95 | 0.988 | 0.698 | 2.16E-141 | Proximal Tubule-7 | Cyp4a10  |
| 7.26E-144 | 0.81 | 0.933 | 0.638 | 2.25E-139 | Proximal Tubule-7 | Calml4   |
| 1.28E-142 | 0.72 | 0.991 | 0.862 | 3.97E-138 | Proximal Tubule-7 | Tmem176a |
| 2.95E-140 | 1.10 | 0.623 | 0.243 | 9.14E-136 | Proximal Tubule-7 | Acsm3    |
| 1.12E-139 | 0.66 | 0.945 | 0.589 | 3.45E-135 | Proximal Tubule-7 | Aldh8a1  |
| 7.47E-139 | 1.27 | 0.998 | 0.99  | 2.31E-134 | Proximal Tubule-7 | Kap      |
| 7.89E-139 | 0.67 | 0.685 | 0.275 | 2.44E-134 | Proximal Tubule-7 | Reep6    |
| 2.84E-137 | 0.67 | 0.952 | 0.723 | 8.80E-133 | Proximal Tubule-7 | Lrpap1   |
| 1.87E-132 | 0.73 | 0.865 | 0.493 | 5.79E-128 | Proximal Tubule-7 | Slc1a1   |
| 3.34E-132 | 0.62 | 0.858 | 0.445 | 1.03E-127 | Proximal Tubule-7 | Mettl7b  |
| 1.76E-131 | 0.53 | 0.68  | 0.285 | 5.44E-127 | Proximal Tubule-7 | Glb1l2   |
| 9.19E-131 | 0.62 | 0.753 | 0.353 | 2.85E-126 | Proximal Tubule-7 | Gchfr    |
| 6.14E-130 | 0.73 | 0.957 | 0.604 | 1.90E-125 | Proximal Tubule-7 | Cyp4a31  |
| 2.97E-126 | 0.81 | 0.824 | 0.405 | 9.19E-122 | Proximal Tubule-7 | Cyp2d9   |
| 7.31E-122 | 0.63 | 0.946 | 0.676 | 2.27E-117 | Proximal Tubule-7 | Hmgcs1   |

|           |      |       |       |           |                   |             |
|-----------|------|-------|-------|-----------|-------------------|-------------|
| 8.90E-122 | 0.58 | 0.701 | 0.309 | 2.76E-117 | Proximal Tubule-7 | Lypla1      |
| 1.06E-120 | 0.55 | 0.843 | 0.477 | 3.29E-116 | Proximal Tubule-7 | Coasy       |
| 1.13E-119 | 0.59 | 0.801 | 0.386 | 3.50E-115 | Proximal Tubule-7 | 630029K05Ri |
| 1.75E-118 | 0.60 | 0.912 | 0.544 | 5.43E-114 | Proximal Tubule-7 | Me1         |
| 7.25E-118 | 0.68 | 0.9   | 0.583 | 2.24E-113 | Proximal Tubule-7 | Ldhd        |
| 4.34E-117 | 0.52 | 0.862 | 0.447 | 1.34E-112 | Proximal Tubule-7 | Adtrp       |
| 1.28E-116 | 0.56 | 0.787 | 0.416 | 3.96E-112 | Proximal Tubule-7 | Acss2       |
| 2.03E-116 | 0.72 | 0.979 | 0.81  | 6.30E-112 | Proximal Tubule-7 | Ttc36       |
| 2.00E-115 | 0.62 | 0.946 | 0.68  | 6.21E-111 | Proximal Tubule-7 | Bphl        |
| 7.86E-114 | 0.63 | 0.862 | 0.536 | 2.43E-109 | Proximal Tubule-7 | Hyi         |
| 8.83E-113 | 0.60 | 0.889 | 0.596 | 2.74E-108 | Proximal Tubule-7 | Fuca2       |
| 6.51E-112 | 0.64 | 0.772 | 0.399 | 2.02E-107 | Proximal Tubule-7 | Mpst        |
| 1.80E-109 | 0.55 | 0.879 | 0.488 | 5.58E-105 | Proximal Tubule-7 | Slc17a3     |
| 1.60E-108 | 0.89 | 0.964 | 0.683 | 4.96E-104 | Proximal Tubule-7 | Lrp2        |
| 4.16E-108 | 0.55 | 0.86  | 0.486 | 1.29E-103 | Proximal Tubule-7 | Sod3        |
| 5.52E-107 | 0.59 | 0.976 | 0.884 | 1.71E-102 | Proximal Tubule-7 | Tmem176b    |
| 1.79E-106 | 0.56 | 0.903 | 0.611 | 5.54E-102 | Proximal Tubule-7 | Lactb2      |
| 2.17E-106 | 0.60 | 0.905 | 0.64  | 6.72E-102 | Proximal Tubule-7 | Glul        |
| 1.03E-105 | 0.58 | 0.913 | 0.575 | 3.18E-101 | Proximal Tubule-7 | Cryzl2      |
| 2.03E-105 | 0.59 | 0.898 | 0.621 | 6.29E-101 | Proximal Tubule-7 | Galnt11     |
| 1.19E-104 | 0.65 | 0.817 | 0.462 | 3.69E-100 | Proximal Tubule-7 | H1f2        |
| 2.84E-103 | 0.79 | 0.907 | 0.61  | 8.80E-99  | Proximal Tubule-7 | Retsat      |
| 4.17E-102 | 0.50 | 0.974 | 0.874 | 1.29E-97  | Proximal Tubule-7 | Oxct1       |
| 4.93E-102 | 0.56 | 0.995 | 0.911 | 1.53E-97  | Proximal Tubule-7 | Cyb5a       |
| 1.83E-101 | 0.58 | 0.879 | 0.496 | 5.65E-97  | Proximal Tubule-7 | Eci3        |
| 1.59E-100 | 0.56 | 0.971 | 0.921 | 4.93E-96  | Proximal Tubule-7 | Psap        |
| 2.23E-99  | 0.55 | 0.799 | 0.382 | 6.90E-95  | Proximal Tubule-7 | Rdh16f2     |
| 2.68E-99  | 0.52 | 0.789 | 0.45  | 8.30E-95  | Proximal Tubule-7 | Far1        |
| 1.07E-98  | 0.56 | 0.815 | 0.462 | 3.31E-94  | Proximal Tubule-7 | Tnfrsf21    |
| 1.73E-98  | 0.52 | 0.943 | 0.773 | 5.37E-94  | Proximal Tubule-7 | Slc25a39    |
| 4.98E-96  | 0.52 | 0.881 | 0.516 | 1.54E-91  | Proximal Tubule-7 | Cubn        |
| 5.74E-94  | 0.58 | 0.952 | 0.66  | 1.78E-89  | Proximal Tubule-7 | Cyp2j5      |
| 8.98E-94  | 0.75 | 0.72  | 0.37  | 2.78E-89  | Proximal Tubule-7 | Pdk4        |
| 1.14E-93  | 0.58 | 0.836 | 0.55  | 3.52E-89  | Proximal Tubule-7 | Por         |
| 1.31E-93  | 0.58 | 0.92  | 0.6   | 4.06E-89  | Proximal Tubule-7 | Slc22a18    |
| 9.08E-91  | 0.50 | 0.756 | 0.41  | 2.81E-86  | Proximal Tubule-7 | Ar          |
| 9.71E-90  | 0.52 | 0.742 | 0.39  | 3.01E-85  | Proximal Tubule-7 | Itgb8       |
| 1.01E-88  | 0.51 | 0.974 | 0.846 | 3.12E-84  | Proximal Tubule-7 | Scp2        |
| 3.50E-88  | 0.55 | 0.9   | 0.617 | 1.09E-83  | Proximal Tubule-7 | Gm2a        |
| 2.86E-87  | 0.54 | 0.903 | 0.604 | 8.86E-83  | Proximal Tubule-7 | Pipox       |
| 3.65E-85  | 0.52 | 0.967 | 0.728 | 1.13E-80  | Proximal Tubule-7 | Khk         |
| 4.29E-85  | 0.51 | 0.799 | 0.44  | 1.33E-80  | Proximal Tubule-7 | Cgref1      |
| 4.11E-84  | 0.58 | 0.971 | 0.9   | 1.27E-79  | Proximal Tubule-7 | Ndufb8      |
| 2.69E-83  | 0.51 | 0.957 | 0.644 | 8.32E-79  | Proximal Tubule-7 | Slc22a12    |
| 7.93E-81  | 0.51 | 0.962 | 0.876 | 2.46E-76  | Proximal Tubule-7 | Txn1        |
| 1.96E-78  | 0.66 | 0.964 | 0.923 | 6.07E-74  | Proximal Tubule-7 | Gpx4        |
| 5.70E-77  | 0.51 | 0.915 | 0.681 | 1.76E-72  | Proximal Tubule-7 | Mettl7a1    |
| 1.37E-73  | 0.79 | 0.884 | 0.751 | 4.25E-69  | Proximal Tubule-7 | Mat2a       |
| 6.78E-70  | 0.59 | 0.898 | 0.663 | 2.10E-65  | Proximal Tubule-7 | Slc6a6      |
| 1.21E-69  | 0.50 | 0.936 | 0.765 | 3.74E-65  | Proximal Tubule-7 | Sod1        |
| 1.88E-26  | 0.91 | 0.708 | 0.553 | 5.82E-22  | Proximal Tubule-7 | Cbr1        |
| 4.29E-21  | 0.66 | 0.612 | 0.434 | 1.33E-16  | Proximal Tubule-7 | Slco1a6     |
| 0.00E+00  | 3.60 | 0.954 | 0.104 | 0.00E+00  | Loops of Henle    | Slc12a1     |
| 0.00E+00  | 3.41 | 0.995 | 0.529 | 0.00E+00  | Loops of Henle    | Umod        |
| 0.00E+00  | 2.94 | 0.937 | 0.248 | 0.00E+00  | Loops of Henle    | Egf         |
| 0.00E+00  | 2.47 | 0.98  | 0.258 | 0.00E+00  | Loops of Henle    | Wfdc15b     |
| 0.00E+00  | 2.04 | 0.989 | 0.218 | 0.00E+00  | Loops of Henle    | Ppp1r1a     |
| 0.00E+00  | 1.80 | 0.858 | 0.198 | 0.00E+00  | Loops of Henle    | Slc5a3      |
| 0.00E+00  | 1.70 | 0.855 | 0.101 | 0.00E+00  | Loops of Henle    | Sostdc1     |
| 0.00E+00  | 1.69 | 0.988 | 0.615 | 0.00E+00  | Loops of Henle    | Nudt4       |
| 0.00E+00  | 1.67 | 0.934 | 0.216 | 0.00E+00  | Loops of Henle    | Ckb         |
| 0.00E+00  | 1.66 | 0.944 | 0.288 | 0.00E+00  | Loops of Henle    | Kng2        |
| 0.00E+00  | 1.65 | 0.998 | 0.715 | 0.00E+00  | Loops of Henle    | Mt1         |
| 0.00E+00  | 1.54 | 0.94  | 0.379 | 0.00E+00  | Loops of Henle    | Mrps6       |

|          |      |       |       |          |                |          |
|----------|------|-------|-------|----------|----------------|----------|
| 0.00E+00 | 1.47 | 0.868 | 0.241 | 0.00E+00 | Loops of Henle | Mt2      |
| 0.00E+00 | 1.44 | 0.739 | 0.27  | 0.00E+00 | Loops of Henle | Hes1     |
| 0.00E+00 | 1.42 | 0.885 | 0.319 | 0.00E+00 | Loops of Henle | Wfdc2    |
| 0.00E+00 | 1.41 | 0.882 | 0.342 | 0.00E+00 | Loops of Henle | Cyfp2    |
| 0.00E+00 | 1.38 | 0.947 | 0.252 | 0.00E+00 | Loops of Henle | Mal      |
| 0.00E+00 | 1.36 | 0.983 | 0.62  | 0.00E+00 | Loops of Henle | Ly6a     |
| 0.00E+00 | 1.28 | 0.939 | 0.239 | 0.00E+00 | Loops of Henle | Cd24a    |
| 0.00E+00 | 1.28 | 0.991 | 0.891 | 0.00E+00 | Loops of Henle | Atp1b1   |
| 0.00E+00 | 1.25 | 0.802 | 0.115 | 0.00E+00 | Loops of Henle | Mfsd4a   |
| 0.00E+00 | 1.24 | 0.809 | 0.103 | 0.00E+00 | Loops of Henle | Tmem72   |
| 0.00E+00 | 1.24 | 0.851 | 0.147 | 0.00E+00 | Loops of Henle | Epcam    |
| 0.00E+00 | 1.23 | 0.719 | 0.027 | 0.00E+00 | Loops of Henle | Ppp1r1b  |
| 0.00E+00 | 1.21 | 0.882 | 0.147 | 0.00E+00 | Loops of Henle | Kcnj1    |
| 0.00E+00 | 1.18 | 0.886 | 0.38  | 0.00E+00 | Loops of Henle | Paqr5    |
| 0.00E+00 | 1.15 | 0.707 | 0.054 | 0.00E+00 | Loops of Henle | Gpx6     |
| 0.00E+00 | 1.13 | 0.836 | 0.184 | 0.00E+00 | Loops of Henle | Efh1     |
| 0.00E+00 | 1.11 | 0.77  | 0.1   | 0.00E+00 | Loops of Henle | Tfap2b   |
| 0.00E+00 | 1.11 | 0.732 | 0.159 | 0.00E+00 | Loops of Henle | Clnkb    |
| 0.00E+00 | 1.09 | 0.968 | 0.711 | 0.00E+00 | Loops of Henle | Spp1     |
| 0.00E+00 | 1.09 | 0.718 | 0.058 | 0.00E+00 | Loops of Henle | Clnka    |
| 0.00E+00 | 1.06 | 0.994 | 0.96  | 0.00E+00 | Loops of Henle | Atp1a1   |
| 0.00E+00 | 1.05 | 0.805 | 0.445 | 0.00E+00 | Loops of Henle | Etnk1    |
| 0.00E+00 | 1.04 | 0.832 | 0.529 | 0.00E+00 | Loops of Henle | Dst      |
| 0.00E+00 | 1.03 | 0.8   | 0.135 | 0.00E+00 | Loops of Henle | Krt7     |
| 0.00E+00 | 0.97 | 0.667 | 0.06  | 0.00E+00 | Loops of Henle | Gm47708  |
| 0.00E+00 | 0.97 | 0.732 | 0.145 | 0.00E+00 | Loops of Henle | Rap1gap  |
| 0.00E+00 | 0.96 | 0.762 | 0.128 | 0.00E+00 | Loops of Henle | Hk1      |
| 0.00E+00 | 0.96 | 0.752 | 0.216 | 0.00E+00 | Loops of Henle | Pde1a    |
| 0.00E+00 | 0.96 | 0.658 | 0.291 | 0.00E+00 | Loops of Henle | Atf3     |
| 0.00E+00 | 0.95 | 0.66  | 0.394 | 0.00E+00 | Loops of Henle | Bhlhe40  |
| 0.00E+00 | 0.93 | 0.814 | 0.243 | 0.00E+00 | Loops of Henle | Aif1l    |
| 0.00E+00 | 0.92 | 0.901 | 0.287 | 0.00E+00 | Loops of Henle | Pkm      |
| 0.00E+00 | 0.92 | 0.804 | 0.433 | 0.00E+00 | Loops of Henle | Ppargc1a |
| 0.00E+00 | 0.90 | 0.829 | 0.484 | 0.00E+00 | Loops of Henle | Adgrg1   |
| 0.00E+00 | 0.90 | 0.762 | 0.13  | 0.00E+00 | Loops of Henle | Slc16a7  |
| 0.00E+00 | 0.89 | 0.862 | 0.634 | 0.00E+00 | Loops of Henle | Pkp4     |
| 0.00E+00 | 0.89 | 0.626 | 0.017 | 0.00E+00 | Loops of Henle | Cldn19   |
| 0.00E+00 | 0.88 | 0.78  | 0.449 | 0.00E+00 | Loops of Henle | Btg2     |
| 0.00E+00 | 0.88 | 0.804 | 0.562 | 0.00E+00 | Loops of Henle | Fos      |
| 0.00E+00 | 0.87 | 0.823 | 0.677 | 0.00E+00 | Loops of Henle | Zfp361l  |
| 0.00E+00 | 0.86 | 0.855 | 0.616 | 0.00E+00 | Loops of Henle | Cgn1l    |
| 0.00E+00 | 0.84 | 0.699 | 0.305 | 0.00E+00 | Loops of Henle | Irf2bpl  |
| 0.00E+00 | 0.83 | 0.693 | 0.108 | 0.00E+00 | Loops of Henle | Kcnk1    |
| 0.00E+00 | 0.81 | 0.72  | 0.328 | 0.00E+00 | Loops of Henle | Sorl1    |
| 0.00E+00 | 0.80 | 0.705 | 0.177 | 0.00E+00 | Loops of Henle | Pou3f3   |
| 0.00E+00 | 0.79 | 0.719 | 0.101 | 0.00E+00 | Loops of Henle | Abca13   |
| 0.00E+00 | 0.79 | 0.777 | 0.394 | 0.00E+00 | Loops of Henle | Aktip    |
| 0.00E+00 | 0.79 | 0.609 | 0.169 | 0.00E+00 | Loops of Henle | Sox4     |
| 0.00E+00 | 0.78 | 0.964 | 0.826 | 0.00E+00 | Loops of Henle | ldh2     |
| 0.00E+00 | 0.78 | 0.77  | 0.455 | 0.00E+00 | Loops of Henle | Egr1     |
| 0.00E+00 | 0.77 | 0.703 | 0.13  | 0.00E+00 | Loops of Henle | Scnn1a   |
| 0.00E+00 | 0.76 | 0.759 | 0.512 | 0.00E+00 | Loops of Henle | Gls      |
| 0.00E+00 | 0.76 | 0.944 | 0.312 | 0.00E+00 | Loops of Henle | Defb1    |
| 0.00E+00 | 0.75 | 0.669 | 0.132 | 0.00E+00 | Loops of Henle | Mecom    |
| 0.00E+00 | 0.74 | 0.756 | 0.42  | 0.00E+00 | Loops of Henle | Acadsb   |
| 0.00E+00 | 0.74 | 0.891 | 0.687 | 0.00E+00 | Loops of Henle | Ivns1abp |
| 0.00E+00 | 0.73 | 0.633 | 0.089 | 0.00E+00 | Loops of Henle | Emb      |
| 0.00E+00 | 0.72 | 0.676 | 0.187 | 0.00E+00 | Loops of Henle | Cd82     |
| 0.00E+00 | 0.72 | 0.933 | 0.782 | 0.00E+00 | Loops of Henle | Bag1     |
| 0.00E+00 | 0.71 | 0.754 | 0.379 | 0.00E+00 | Loops of Henle | Nfe21l   |
| 0.00E+00 | 0.71 | 0.607 | 0.212 | 0.00E+00 | Loops of Henle | Slc9a3   |
| 0.00E+00 | 0.71 | 0.854 | 0.524 | 0.00E+00 | Loops of Henle | Gadd45g  |
| 0.00E+00 | 0.70 | 0.659 | 0.247 | 0.00E+00 | Loops of Henle | Baiap2l2 |
| 0.00E+00 | 0.70 | 0.81  | 0.418 | 0.00E+00 | Loops of Henle | Fabp3    |

|           |      |       |       |           |                |          |
|-----------|------|-------|-------|-----------|----------------|----------|
| 0.00E+00  | 0.69 | 0.807 | 0.506 | 0.00E+00  | Loops of Henle | ccdc198  |
| 0.00E+00  | 0.69 | 0.694 | 0.241 | 0.00E+00  | Loops of Henle | Hoxd8    |
| 0.00E+00  | 0.68 | 0.647 | 0.229 | 0.00E+00  | Loops of Henle | Stard8   |
| 0.00E+00  | 0.68 | 0.694 | 0.26  | 0.00E+00  | Loops of Henle | Wnk4     |
| 0.00E+00  | 0.67 | 0.928 | 0.586 | 0.00E+00  | Loops of Henle | Klk1     |
| 0.00E+00  | 0.66 | 0.709 | 0.433 | 0.00E+00  | Loops of Henle | Syne2    |
| 0.00E+00  | 0.66 | 0.671 | 0.363 | 0.00E+00  | Loops of Henle | Itgb6    |
| 0.00E+00  | 0.66 | 0.803 | 0.593 | 0.00E+00  | Loops of Henle | Tfcp2l1  |
| 0.00E+00  | 0.65 | 0.633 | 0.325 | 0.00E+00  | Loops of Henle | Lamb1    |
| 0.00E+00  | 0.64 | 0.653 | 0.219 | 0.00E+00  | Loops of Henle | Cdkl1    |
| 0.00E+00  | 0.64 | 0.752 | 0.145 | 0.00E+00  | Loops of Henle | Tspan8   |
| 0.00E+00  | 0.64 | 0.689 | 0.405 | 0.00E+00  | Loops of Henle | Usp2     |
| 0.00E+00  | 0.64 | 0.657 | 0.24  | 0.00E+00  | Loops of Henle | Tacc1    |
| 0.00E+00  | 0.62 | 0.924 | 0.675 | 0.00E+00  | Loops of Henle | Txnip    |
| 0.00E+00  | 0.62 | 0.668 | 0.245 | 0.00E+00  | Loops of Henle | Cdh1     |
| 0.00E+00  | 0.61 | 0.849 | 0.657 | 0.00E+00  | Loops of Henle | Spint2   |
| 0.00E+00  | 0.61 | 0.877 | 0.723 | 0.00E+00  | Loops of Henle | Arhgap5  |
| 0.00E+00  | 0.60 | 0.861 | 0.694 | 0.00E+00  | Loops of Henle | Hadha    |
| 0.00E+00  | 0.59 | 0.817 | 0.559 | 0.00E+00  | Loops of Henle | Wwc1     |
| 0.00E+00  | 0.58 | 0.689 | 0.36  | 0.00E+00  | Loops of Henle | P3h2     |
| 0.00E+00  | 0.58 | 0.833 | 0.651 | 0.00E+00  | Loops of Henle | Camk2n1  |
| 0.00E+00  | 0.57 | 0.761 | 0.541 | 0.00E+00  | Loops of Henle | Bicc1    |
| 0.00E+00  | 0.57 | 0.836 | 0.661 | 0.00E+00  | Loops of Henle | Fmc1     |
| 0.00E+00  | 0.57 | 0.627 | 0.292 | 0.00E+00  | Loops of Henle | Shmt1    |
| 0.00E+00  | 0.56 | 0.872 | 0.719 | 0.00E+00  | Loops of Henle | Mgst3    |
| 0.00E+00  | 0.56 | 0.604 | 0.269 | 0.00E+00  | Loops of Henle | Tanc1    |
| 0.00E+00  | 0.56 | 0.978 | 0.901 | 0.00E+00  | Loops of Henle | Atp5g3   |
| 0.00E+00  | 0.55 | 0.897 | 0.802 | 0.00E+00  | Loops of Henle | Sdc4     |
| 0.00E+00  | 0.54 | 0.762 | 0.454 | 0.00E+00  | Loops of Henle | Ndrg2    |
| 0.00E+00  | 0.54 | 0.869 | 0.726 | 0.00E+00  | Loops of Henle | Cdh16    |
| 0.00E+00  | 0.54 | 0.992 | 0.965 | 0.00E+00  | Loops of Henle | Uqcrh    |
| 0.00E+00  | 0.53 | 0.992 | 0.99  | 0.00E+00  | Loops of Henle | mt-Nd3   |
| 0.00E+00  | 0.51 | 0.982 | 0.924 | 0.00E+00  | Loops of Henle | Aldoa    |
| 0.00E+00  | 0.51 | 0.987 | 0.936 | 0.00E+00  | Loops of Henle | Cox7b    |
| 0.00E+00  | 0.50 | 0.983 | 0.926 | 0.00E+00  | Loops of Henle | Atp5g1   |
| 1.55E-303 | 0.93 | 0.738 | 0.574 | 4.81E-299 | Loops of Henle | Zfp36    |
| 1.11E-288 | 0.78 | 0.761 | 0.627 | 3.44E-284 | Loops of Henle | Slc25a30 |
| 1.67E-278 | 0.80 | 0.663 | 0.468 | 5.16E-274 | Loops of Henle | Itga6    |
| 8.87E-268 | 0.90 | 0.767 | 0.671 | 2.75E-263 | Loops of Henle | Cldn10   |
| 1.13E-195 | 0.59 | 0.854 | 0.76  | 3.49E-191 | Loops of Henle | Tsc22d1  |
| 0.00E+00  | 3.72 | 0.906 | 0.141 | 0.00E+00  | Distal Tubule  | Slc12a3  |
| 0.00E+00  | 3.04 | 0.876 | 0.188 | 0.00E+00  | Distal Tubule  | Calb1    |
| 0.00E+00  | 2.18 | 0.969 | 0.333 | 0.00E+00  | Distal Tubule  | Defb1    |
| 0.00E+00  | 2.10 | 0.952 | 0.553 | 0.00E+00  | Distal Tubule  | Wnk1     |
| 0.00E+00  | 1.98 | 0.897 | 0.092 | 0.00E+00  | Distal Tubule  | Pgam2    |
| 0.00E+00  | 1.96 | 0.932 | 0.599 | 0.00E+00  | Distal Tubule  | Klk1     |
| 0.00E+00  | 1.90 | 0.948 | 0.152 | 0.00E+00  | Distal Tubule  | Tmem52b  |
| 0.00E+00  | 1.87 | 0.846 | 0.189 | 0.00E+00  | Distal Tubule  | Clu      |
| 0.00E+00  | 1.70 | 0.919 | 0.225 | 0.00E+00  | Distal Tubule  | Tmem213  |
| 0.00E+00  | 1.65 | 0.727 | 0.123 | 0.00E+00  | Distal Tubule  | Abca13   |
| 0.00E+00  | 1.49 | 0.91  | 0.315 | 0.00E+00  | Distal Tubule  | Kng2     |
| 0.00E+00  | 1.48 | 0.931 | 0.251 | 0.00E+00  | Distal Tubule  | Ppp1r1a  |
| 0.00E+00  | 1.44 | 0.671 | 0.072 | 0.00E+00  | Distal Tubule  | Sfrp1    |
| 0.00E+00  | 1.38 | 0.987 | 0.726 | 0.00E+00  | Distal Tubule  | Mt1      |
| 0.00E+00  | 1.36 | 0.906 | 0.309 | 0.00E+00  | Distal Tubule  | Pkm      |
| 0.00E+00  | 1.35 | 0.995 | 0.961 | 0.00E+00  | Distal Tubule  | Atp1a1   |
| 0.00E+00  | 1.28 | 0.82  | 0.179 | 0.00E+00  | Distal Tubule  | Kcnj1    |
| 0.00E+00  | 1.27 | 0.837 | 0.172 | 0.00E+00  | Distal Tubule  | Clnkb    |
| 0.00E+00  | 1.21 | 0.698 | 0.161 | 0.00E+00  | Distal Tubule  | Klhl3    |
| 0.00E+00  | 1.16 | 0.792 | 0.25  | 0.00E+00  | Distal Tubule  | Hoxd8    |
| 0.00E+00  | 1.16 | 0.729 | 0.156 | 0.00E+00  | Distal Tubule  | Slc16a7  |
| 0.00E+00  | 1.14 | 0.804 | 0.299 | 0.00E+00  | Distal Tubule  | Wfdc15b  |
| 0.00E+00  | 1.11 | 0.916 | 0.28  | 0.00E+00  | Distal Tubule  | Mal      |
| 0.00E+00  | 1.10 | 0.706 | 0.148 | 0.00E+00  | Distal Tubule  | Emx1     |

|           |      |       |       |           |               |           |
|-----------|------|-------|-------|-----------|---------------|-----------|
| 0.00E+00  | 1.08 | 0.77  | 0.272 | 0.00E+00  | Distal Tubule | Mt2       |
| 0.00E+00  | 1.07 | 0.862 | 0.342 | 0.00E+00  | Distal Tubule | Wfdc2     |
| 0.00E+00  | 1.06 | 0.841 | 0.43  | 0.00E+00  | Distal Tubule | Fabp3     |
| 0.00E+00  | 1.04 | 0.665 | 0.364 | 0.00E+00  | Distal Tubule | Sgms2     |
| 0.00E+00  | 1.03 | 0.946 | 0.81  | 0.00E+00  | Distal Tubule | S100a1    |
| 0.00E+00  | 1.00 | 0.704 | 0.275 | 0.00E+00  | Distal Tubule | Wnk4      |
| 0.00E+00  | 0.97 | 0.773 | 0.39  | 0.00E+00  | Distal Tubule | Ier3      |
| 0.00E+00  | 0.93 | 0.642 | 0.266 | 0.00E+00  | Distal Tubule | Ckb       |
| 0.00E+00  | 0.88 | 0.999 | 0.976 | 0.00E+00  | Distal Tubule | Fxyd2     |
| 0.00E+00  | 0.86 | 0.674 | 0.153 | 0.00E+00  | Distal Tubule | Scnn1a    |
| 0.00E+00  | 0.86 | 0.64  | 0.133 | 0.00E+00  | Distal Tubule | Pcolce    |
| 0.00E+00  | 0.86 | 0.612 | 0.107 | 0.00E+00  | Distal Tubule | Cldn8     |
| 0.00E+00  | 0.86 | 0.858 | 0.391 | 0.00E+00  | Distal Tubule | Sh3bgrl3  |
| 0.00E+00  | 0.86 | 0.713 | 0.267 | 0.00E+00  | Distal Tubule | Gsta4     |
| 0.00E+00  | 0.83 | 0.77  | 0.287 | 0.00E+00  | Distal Tubule | Egf       |
| 0.00E+00  | 0.82 | 0.657 | 0.287 | 0.00E+00  | Distal Tubule | Papss1    |
| 0.00E+00  | 0.81 | 0.95  | 0.832 | 0.00E+00  | Distal Tubule | Idh2      |
| 0.00E+00  | 0.80 | 0.929 | 0.852 | 0.00E+00  | Distal Tubule | Gabarapl1 |
| 0.00E+00  | 0.79 | 0.916 | 0.634 | 0.00E+00  | Distal Tubule | Nudt4     |
| 0.00E+00  | 0.78 | 0.652 | 0.142 | 0.00E+00  | Distal Tubule | Tmem72    |
| 0.00E+00  | 0.77 | 0.98  | 0.964 | 0.00E+00  | Distal Tubule | Atp5e     |
| 0.00E+00  | 0.76 | 0.984 | 0.938 | 0.00E+00  | Distal Tubule | Cox7b     |
| 0.00E+00  | 0.75 | 0.968 | 0.905 | 0.00E+00  | Distal Tubule | Atp5k     |
| 0.00E+00  | 0.73 | 0.993 | 0.927 | 0.00E+00  | Distal Tubule | Ldhd      |
| 0.00E+00  | 0.72 | 0.994 | 0.98  | 0.00E+00  | Distal Tubule | Cox6c     |
| 0.00E+00  | 0.71 | 0.73  | 0.361 | 0.00E+00  | Distal Tubule | Cd9       |
| 0.00E+00  | 0.71 | 0.947 | 0.876 | 0.00E+00  | Distal Tubule | Ndufa1    |
| 0.00E+00  | 0.70 | 0.969 | 0.896 | 0.00E+00  | Distal Tubule | Atp1b1    |
| 0.00E+00  | 0.67 | 0.974 | 0.929 | 0.00E+00  | Distal Tubule | Atp5g1    |
| 0.00E+00  | 0.65 | 0.749 | 0.409 | 0.00E+00  | Distal Tubule | Paqr5     |
| 0.00E+00  | 0.64 | 0.949 | 0.877 | 0.00E+00  | Distal Tubule | Ndufc1    |
| 0.00E+00  | 0.63 | 0.981 | 0.961 | 0.00E+00  | Distal Tubule | Atp5h     |
| 0.00E+00  | 0.62 | 0.984 | 0.96  | 0.00E+00  | Distal Tubule | Cox5b     |
| 0.00E+00  | 0.60 | 0.973 | 0.939 | 0.00E+00  | Distal Tubule | Uqcrq     |
| 0.00E+00  | 0.60 | 0.978 | 0.956 | 0.00E+00  | Distal Tubule | Cox6b1    |
| 0.00E+00  | 0.60 | 0.894 | 0.555 | 0.00E+00  | Distal Tubule | Umod      |
| 0.00E+00  | 0.59 | 0.977 | 0.954 | 0.00E+00  | Distal Tubule | Atp5j     |
| 0.00E+00  | 0.58 | 0.998 | 0.987 | 0.00E+00  | Distal Tubule | Cox8a     |
| 0.00E+00  | 0.57 | 0.641 | 0.223 | 0.00E+00  | Distal Tubule | Efh1      |
| 0.00E+00  | 0.53 | 0.647 | 0.19  | 0.00E+00  | Distal Tubule | Epcam     |
| 1.19E-304 | 0.54 | 0.975 | 0.94  | 3.68E-300 | Distal Tubule | Uqcr11    |
| 1.84E-297 | 0.50 | 0.659 | 0.277 | 5.69E-293 | Distal Tubule | Aif1      |
| 1.19E-292 | 0.51 | 0.977 | 0.965 | 3.68E-288 | Distal Tubule | Cox7a2    |
| 3.47E-290 | 0.56 | 0.748 | 0.415 | 1.07E-285 | Distal Tubule | Mrps6     |
| 5.00E-288 | 0.55 | 0.959 | 0.906 | 1.55E-283 | Distal Tubule | Atp5g3    |
| 1.78E-269 | 0.68 | 0.616 | 0.297 | 5.53E-265 | Distal Tubule | Cdo1      |
| 1.37E-267 | 0.52 | 0.964 | 0.928 | 4.23E-263 | Distal Tubule | Aldoa     |
| 2.32E-259 | 0.50 | 0.968 | 0.95  | 7.19E-255 | Distal Tubule | Atp5j2    |
| 7.43E-259 | 0.66 | 0.763 | 0.521 | 2.30E-254 | Distal Tubule | ccdc198   |
| 1.74E-258 | 2.45 | 0.882 | 0.814 | 5.40E-254 | Distal Tubule | S100g     |
| 2.04E-255 | 0.60 | 0.713 | 0.394 | 6.32E-251 | Distal Tubule | Acss1     |
| 6.80E-246 | 0.53 | 0.949 | 0.91  | 2.11E-241 | Distal Tubule | Ndufb11   |
| 4.28E-231 | 0.59 | 0.884 | 0.791 | 1.33E-226 | Distal Tubule | Bag1      |
| 3.50E-229 | 0.60 | 0.674 | 0.439 | 1.09E-224 | Distal Tubule | Acadslb   |
| 1.79E-224 | 0.54 | 0.892 | 0.827 | 5.55E-220 | Distal Tubule | Ndufa11   |
| 1.56E-223 | 0.80 | 0.646 | 0.457 | 4.83E-219 | Distal Tubule | Trpm7     |
| 9.93E-222 | 0.59 | 0.937 | 0.871 | 3.08E-217 | Distal Tubule | Oxct1     |
| 6.02E-218 | 0.58 | 0.881 | 0.807 | 1.86E-213 | Distal Tubule | Sdc4      |
| 8.62E-214 | 0.51 | 0.928 | 0.875 | 2.67E-209 | Distal Tubule | Tle5      |
| 6.51E-203 | 0.57 | 0.837 | 0.728 | 2.02E-198 | Distal Tubule | Mgst3     |
| 5.76E-201 | 0.50 | 0.946 | 0.909 | 1.78E-196 | Distal Tubule | Atp5o.1   |
| 1.40E-198 | 0.51 | 0.85  | 0.784 | 4.33E-194 | Distal Tubule | Atp6v0e   |
| 8.22E-187 | 0.50 | 0.891 | 0.823 | 2.55E-182 | Distal Tubule | Prdx2     |
| 1.44E-186 | 0.54 | 0.865 | 0.689 | 4.47E-182 | Distal Tubule | Txnip     |



|           |      |       |       |           |               |          |
|-----------|------|-------|-------|-----------|---------------|----------|
| 6.95E-182 | 0.68 | 0.918 | 0.725 | 2.15E-177 | Distal Tubule | Spp1     |
| 3.07E-171 | 0.50 | 0.772 | 0.67  | 9.52E-167 | Distal Tubule | Spint2   |
| 3.67E-165 | 0.51 | 0.7   | 0.514 | 1.14E-160 | Distal Tubule | Gstt1    |
| 2.48E-129 | 0.85 | 0.67  | 0.581 | 7.67E-125 | Distal Tubule | Kl       |
| 6.49E-76  | 0.80 | 0.657 | 0.583 | 2.01E-71  | Distal Tubule | Fos      |
| 0.00E+00  | 3.74 | 0.967 | 0.128 | 0.00E+00  | Podocyte-1    | Plat     |
| 0.00E+00  | 3.53 | 0.995 | 0.059 | 0.00E+00  | Podocyte-1    | Emcn     |
| 0.00E+00  | 3.28 | 0.996 | 0.067 | 0.00E+00  | Podocyte-1    | Plpp1    |
| 0.00E+00  | 3.18 | 0.925 | 0.063 | 0.00E+00  | Podocyte-1    | Ehd3     |
| 0.00E+00  | 3.09 | 0.978 | 0.04  | 0.00E+00  | Podocyte-1    | Kdr      |
| 0.00E+00  | 2.81 | 0.98  | 0.224 | 0.00E+00  | Podocyte-1    | Plpp3    |
| 0.00E+00  | 2.71 | 0.984 | 0.16  | 0.00E+00  | Podocyte-1    | Ly6c1    |
| 0.00E+00  | 2.65 | 0.964 | 0.061 | 0.00E+00  | Podocyte-1    | Egfl7    |
| 0.00E+00  | 2.54 | 0.814 | 0.29  | 0.00E+00  | Podocyte-1    | Igfbp5   |
| 0.00E+00  | 2.54 | 0.96  | 0.268 | 0.00E+00  | Podocyte-1    | Nrp1     |
| 0.00E+00  | 2.47 | 0.805 | 0.045 | 0.00E+00  | Podocyte-1    | Fabp4    |
| 0.00E+00  | 2.46 | 0.914 | 0.036 | 0.00E+00  | Podocyte-1    | Ctla2a   |
| 0.00E+00  | 2.43 | 0.952 | 0.044 | 0.00E+00  | Podocyte-1    | Eng      |
| 0.00E+00  | 2.37 | 0.93  | 0.02  | 0.00E+00  | Podocyte-1    | Cd300lg  |
| 0.00E+00  | 2.33 | 0.932 | 0.039 | 0.00E+00  | Podocyte-1    | Flt1     |
| 0.00E+00  | 2.28 | 0.961 | 0.076 | 0.00E+00  | Podocyte-1    | Meis2    |
| 0.00E+00  | 2.27 | 0.964 | 0.132 | 0.00E+00  | Podocyte-1    | Slc9a3r2 |
| 0.00E+00  | 2.17 | 0.911 | 0.039 | 0.00E+00  | Podocyte-1    | Gimap4   |
| 0.00E+00  | 2.14 | 0.935 | 0.04  | 0.00E+00  | Podocyte-1    | Ptprb    |
| 0.00E+00  | 2.12 | 0.911 | 0.098 | 0.00E+00  | Podocyte-1    | Ramp2    |
| 0.00E+00  | 2.08 | 0.738 | 0.014 | 0.00E+00  | Podocyte-1    | Gpihbp1  |
| 0.00E+00  | 2.06 | 0.94  | 0.081 | 0.00E+00  | Podocyte-1    | S100a6   |
| 0.00E+00  | 2.05 | 0.981 | 0.212 | 0.00E+00  | Podocyte-1    | Klf2     |
| 0.00E+00  | 2.05 | 0.961 | 0.093 | 0.00E+00  | Podocyte-1    | Srgn     |
| 0.00E+00  | 2.01 | 0.78  | 0.031 | 0.00E+00  | Podocyte-1    | Pi16     |
| 0.00E+00  | 2.01 | 0.954 | 0.158 | 0.00E+00  | Podocyte-1    | Sparc    |
| 0.00E+00  | 2.00 | 0.848 | 0.048 | 0.00E+00  | Podocyte-1    | Dlc1     |
| 0.00E+00  | 1.96 | 0.915 | 0.119 | 0.00E+00  | Podocyte-1    | Cd200    |
| 0.00E+00  | 1.96 | 0.917 | 0.043 | 0.00E+00  | Podocyte-1    | Pecam1   |
| 0.00E+00  | 1.95 | 0.95  | 0.106 | 0.00E+00  | Podocyte-1    | Ifitm3   |
| 0.00E+00  | 1.93 | 0.896 | 0.059 | 0.00E+00  | Podocyte-1    | Adgrf5   |
| 0.00E+00  | 1.92 | 0.888 | 0.04  | 0.00E+00  | Podocyte-1    | Gimap6   |
| 0.00E+00  | 1.91 | 0.95  | 0.113 | 0.00E+00  | Podocyte-1    | Tm4sf1   |
| 0.00E+00  | 1.90 | 0.858 | 0.133 | 0.00E+00  | Podocyte-1    | Hspb1    |
| 0.00E+00  | 1.87 | 0.897 | 0.068 | 0.00E+00  | Podocyte-1    | Esam     |
| 0.00E+00  | 1.87 | 0.928 | 0.201 | 0.00E+00  | Podocyte-1    | Epas1    |
| 0.00E+00  | 1.87 | 0.87  | 0.088 | 0.00E+00  | Podocyte-1    | Gng11    |
| 0.00E+00  | 1.86 | 0.988 | 0.675 | 0.00E+00  | Podocyte-1    | Serinc3  |
| 0.00E+00  | 1.86 | 0.837 | 0.027 | 0.00E+00  | Podocyte-1    | AU021092 |
| 0.00E+00  | 1.80 | 0.821 | 0.027 | 0.00E+00  | Podocyte-1    | Gimap5   |
| 0.00E+00  | 1.77 | 0.788 | 0.124 | 0.00E+00  | Podocyte-1    | Tcim     |
| 0.00E+00  | 1.73 | 0.926 | 0.197 | 0.00E+00  | Podocyte-1    | Crip2    |
| 0.00E+00  | 1.73 | 0.841 | 0.025 | 0.00E+00  | Podocyte-1    | Cypr1    |
| 0.00E+00  | 1.73 | 0.851 | 0.029 | 0.00E+00  | Podocyte-1    | Cdh5     |
| 0.00E+00  | 1.73 | 0.685 | 0.03  | 0.00E+00  | Podocyte-1    | Ednrb    |
| 0.00E+00  | 1.66 | 0.875 | 0.42  | 0.00E+00  | Podocyte-1    | Pbx1     |
| 0.00E+00  | 1.64 | 0.734 | 0.029 | 0.00E+00  | Podocyte-1    | Dkk2     |
| 0.00E+00  | 1.64 | 0.898 | 0.147 | 0.00E+00  | Podocyte-1    | Podxl    |
| 0.00E+00  | 1.64 | 0.652 | 0.02  | 0.00E+00  | Podocyte-1    | Cyp26b1  |
| 0.00E+00  | 1.64 | 0.767 | 0.024 | 0.00E+00  | Podocyte-1    | Tmem204  |
| 0.00E+00  | 1.63 | 0.964 | 0.623 | 0.00E+00  | Podocyte-1    | Gnai2    |
| 0.00E+00  | 1.63 | 0.917 | 0.281 | 0.00E+00  | Podocyte-1    | Cd24a    |
| 0.00E+00  | 1.63 | 0.966 | 0.609 | 0.00E+00  | Podocyte-1    | H2-D1    |
| 0.00E+00  | 1.61 | 0.928 | 0.53  | 0.00E+00  | Podocyte-1    | Sgk1     |
| 0.00E+00  | 1.61 | 0.807 | 0.03  | 0.00E+00  | Podocyte-1    | Icam2    |
| 0.00E+00  | 1.61 | 0.963 | 0.444 | 0.00E+00  | Podocyte-1    | Ly6e     |
| 0.00E+00  | 1.59 | 0.755 | 0.032 | 0.00E+00  | Podocyte-1    | Sifn5    |
| 0.00E+00  | 1.59 | 0.819 | 0.033 | 0.00E+00  | Podocyte-1    | Adgrl4   |
| 0.00E+00  | 1.55 | 0.794 | 0.03  | 0.00E+00  | Podocyte-1    | Mmrn2    |

|          |      |       |       |          |            |          |
|----------|------|-------|-------|----------|------------|----------|
| 0.00E+00 | 1.55 | 0.953 | 0.394 | 0.00E+00 | Podocyte-1 | Ifitm2   |
| 0.00E+00 | 1.53 | 0.791 | 0.253 | 0.00E+00 | Podocyte-1 | Cdkn1a   |
| 0.00E+00 | 1.51 | 0.698 | 0.008 | 0.00E+00 | Podocyte-1 | Fam167b  |
| 0.00E+00 | 1.51 | 0.822 | 0.293 | 0.00E+00 | Podocyte-1 | Snrk     |
| 0.00E+00 | 1.50 | 0.793 | 0.091 | 0.00E+00 | Podocyte-1 | Ehd4     |
| 0.00E+00 | 1.50 | 0.867 | 0.482 | 0.00E+00 | Podocyte-1 | Clic4    |
| 0.00E+00 | 1.49 | 0.774 | 0.053 | 0.00E+00 | Podocyte-1 | Gimap1   |
| 0.00E+00 | 1.47 | 0.745 | 0.014 | 0.00E+00 | Podocyte-1 | Exoc3l2  |
| 0.00E+00 | 1.47 | 0.977 | 0.654 | 0.00E+00 | Podocyte-1 | B2m      |
| 0.00E+00 | 1.47 | 0.762 | 0.119 | 0.00E+00 | Podocyte-1 | Klf7     |
| 0.00E+00 | 1.47 | 0.771 | 0.048 | 0.00E+00 | Podocyte-1 | Gngt2    |
| 0.00E+00 | 1.46 | 0.92  | 0.581 | 0.00E+00 | Podocyte-1 | Fkbp1a   |
| 0.00E+00 | 1.44 | 0.688 | 0.02  | 0.00E+00 | Podocyte-1 | Hecw2    |
| 0.00E+00 | 1.42 | 0.694 | 0.037 | 0.00E+00 | Podocyte-1 | Tshz2    |
| 0.00E+00 | 1.42 | 0.719 | 0.048 | 0.00E+00 | Podocyte-1 | Efnb2    |
| 0.00E+00 | 1.41 | 0.832 | 0.344 | 0.00E+00 | Podocyte-1 | Rbms1    |
| 0.00E+00 | 1.41 | 0.748 | 0.026 | 0.00E+00 | Podocyte-1 | Slc43a3  |
| 0.00E+00 | 1.41 | 0.698 | 0.022 | 0.00E+00 | Podocyte-1 | Rasgrp3  |
| 0.00E+00 | 1.40 | 0.866 | 0.422 | 0.00E+00 | Podocyte-1 | Id1      |
| 0.00E+00 | 1.39 | 0.718 | 0.028 | 0.00E+00 | Podocyte-1 | F2r      |
| 0.00E+00 | 1.39 | 0.711 | 0.23  | 0.00E+00 | Podocyte-1 | Klf4     |
| 0.00E+00 | 1.39 | 0.708 | 0.027 | 0.00E+00 | Podocyte-1 | Clec1a   |
| 0.00E+00 | 1.38 | 0.932 | 0.6   | 0.00E+00 | Podocyte-1 | Id3      |
| 0.00E+00 | 1.37 | 0.874 | 0.398 | 0.00E+00 | Podocyte-1 | S100a13  |
| 0.00E+00 | 1.36 | 0.953 | 0.727 | 0.00E+00 | Podocyte-1 | Laptm4a  |
| 0.00E+00 | 1.36 | 0.795 | 0.269 | 0.00E+00 | Podocyte-1 | Ece1     |
| 0.00E+00 | 1.36 | 0.783 | 0.069 | 0.00E+00 | Podocyte-1 | Anxa3    |
| 0.00E+00 | 1.36 | 0.73  | 0.041 | 0.00E+00 | Podocyte-1 | Cavin3   |
| 0.00E+00 | 1.35 | 0.787 | 0.283 | 0.00E+00 | Podocyte-1 | Tcf4     |
| 0.00E+00 | 1.34 | 0.957 | 0.756 | 0.00E+00 | Podocyte-1 | Sptbn1   |
| 0.00E+00 | 1.33 | 0.847 | 0.406 | 0.00E+00 | Podocyte-1 | Mxd4     |
| 0.00E+00 | 1.32 | 0.772 | 0.323 | 0.00E+00 | Podocyte-1 | Dusp3    |
| 0.00E+00 | 1.32 | 0.79  | 0.281 | 0.00E+00 | Podocyte-1 | Ccdc85b  |
| 0.00E+00 | 1.31 | 0.718 | 0.024 | 0.00E+00 | Podocyte-1 | Cd34     |
| 0.00E+00 | 1.31 | 0.839 | 0.393 | 0.00E+00 | Podocyte-1 | Rhob     |
| 0.00E+00 | 1.30 | 0.706 | 0.143 | 0.00E+00 | Podocyte-1 | Cmtm8    |
| 0.00E+00 | 1.29 | 0.647 | 0.163 | 0.00E+00 | Podocyte-1 | Cavin2   |
| 0.00E+00 | 1.29 | 0.69  | 0.151 | 0.00E+00 | Podocyte-1 | Tspan7   |
| 0.00E+00 | 1.29 | 0.811 | 0.339 | 0.00E+00 | Podocyte-1 | S100a16  |
| 0.00E+00 | 1.29 | 0.714 | 0.106 | 0.00E+00 | Podocyte-1 | Syne1    |
| 0.00E+00 | 1.28 | 0.716 | 0.095 | 0.00E+00 | Podocyte-1 | Fas      |
| 0.00E+00 | 1.28 | 0.854 | 0.519 | 0.00E+00 | Podocyte-1 | Cd47     |
| 0.00E+00 | 1.27 | 0.728 | 0.157 | 0.00E+00 | Podocyte-1 | Tinagl1  |
| 0.00E+00 | 1.27 | 0.736 | 0.287 | 0.00E+00 | Podocyte-1 | Lifr     |
| 0.00E+00 | 1.26 | 0.732 | 0.049 | 0.00E+00 | Podocyte-1 | Arhgap31 |
| 0.00E+00 | 1.26 | 0.682 | 0.041 | 0.00E+00 | Podocyte-1 | Cbfa2t3  |
| 0.00E+00 | 1.25 | 0.8   | 0.448 | 0.00E+00 | Podocyte-1 | Ppp1r2   |
| 0.00E+00 | 1.25 | 0.726 | 0.235 | 0.00E+00 | Podocyte-1 | Myo1c    |
| 0.00E+00 | 1.24 | 0.676 | 0.028 | 0.00E+00 | Podocyte-1 | Bvht     |
| 0.00E+00 | 1.24 | 0.627 | 0.016 | 0.00E+00 | Podocyte-1 | Sox18    |
| 0.00E+00 | 1.24 | 0.876 | 0.541 | 0.00E+00 | Podocyte-1 | Tagln2   |
| 0.00E+00 | 1.23 | 0.645 | 0.102 | 0.00E+00 | Podocyte-1 | Slco2a1  |
| 0.00E+00 | 1.23 | 0.787 | 0.08  | 0.00E+00 | Podocyte-1 | Fxyd5    |
| 0.00E+00 | 1.23 | 0.674 | 0.034 | 0.00E+00 | Podocyte-1 | Heg1     |
| 0.00E+00 | 1.22 | 0.951 | 0.684 | 0.00E+00 | Podocyte-1 | H2-K1    |
| 0.00E+00 | 1.22 | 0.743 | 0.179 | 0.00E+00 | Podocyte-1 | Eva1b    |
| 0.00E+00 | 1.21 | 0.984 | 0.874 | 0.00E+00 | Podocyte-1 | Cd81     |
| 0.00E+00 | 1.21 | 0.724 | 0.178 | 0.00E+00 | Podocyte-1 | Fam117b  |
| 0.00E+00 | 1.21 | 0.688 | 0.242 | 0.00E+00 | Podocyte-1 | Ntn4     |
| 0.00E+00 | 1.21 | 0.872 | 0.69  | 0.00E+00 | Podocyte-1 | Lpl      |
| 0.00E+00 | 1.20 | 0.687 | 0.096 | 0.00E+00 | Podocyte-1 | Adgre5   |
| 0.00E+00 | 1.20 | 0.748 | 0.255 | 0.00E+00 | Podocyte-1 | Tpm4     |
| 0.00E+00 | 1.20 | 0.654 | 0.023 | 0.00E+00 | Podocyte-1 | Myct1    |
| 0.00E+00 | 1.20 | 0.775 | 0.146 | 0.00E+00 | Podocyte-1 | Anxa2    |

|          |      |       |       |          |            |             |
|----------|------|-------|-------|----------|------------|-------------|
| 0.00E+00 | 1.20 | 0.659 | 0.021 | 0.00E+00 | Podocyte-1 | Tek         |
| 0.00E+00 | 1.19 | 0.738 | 0.315 | 0.00E+00 | Podocyte-1 | Col4a1      |
| 0.00E+00 | 1.19 | 0.732 | 0.199 | 0.00E+00 | Podocyte-1 | Vamp5       |
| 0.00E+00 | 1.19 | 0.95  | 0.805 | 0.00E+00 | Podocyte-1 | Calm1       |
| 0.00E+00 | 1.18 | 0.666 | 0.066 | 0.00E+00 | Podocyte-1 | Notch1      |
| 0.00E+00 | 1.17 | 0.642 | 0.023 | 0.00E+00 | Podocyte-1 | Tie1        |
| 0.00E+00 | 1.16 | 0.681 | 0.058 | 0.00E+00 | Podocyte-1 | Cald1       |
| 0.00E+00 | 1.16 | 0.701 | 0.27  | 0.00E+00 | Podocyte-1 | Clic5       |
| 0.00E+00 | 1.16 | 0.762 | 0.34  | 0.00E+00 | Podocyte-1 | Msn         |
| 0.00E+00 | 1.16 | 0.608 | 0.025 | 0.00E+00 | Podocyte-1 | Tbx3        |
| 0.00E+00 | 1.16 | 0.649 | 0.029 | 0.00E+00 | Podocyte-1 | S1pr1       |
| 0.00E+00 | 1.16 | 0.627 | 0.012 | 0.00E+00 | Podocyte-1 | Cd38        |
| 0.00E+00 | 1.15 | 0.653 | 0.024 | 0.00E+00 | Podocyte-1 | Rasip1      |
| 0.00E+00 | 1.15 | 0.887 | 0.577 | 0.00E+00 | Podocyte-1 | Clic1       |
| 0.00E+00 | 1.15 | 0.69  | 0.182 | 0.00E+00 | Podocyte-1 | Bnip2       |
| 0.00E+00 | 1.15 | 0.694 | 0.112 | 0.00E+00 | Podocyte-1 | Bst2        |
| 0.00E+00 | 1.14 | 0.73  | 0.192 | 0.00E+00 | Podocyte-1 | Rras        |
| 0.00E+00 | 1.14 | 0.631 | 0.056 | 0.00E+00 | Podocyte-1 | Lmcd1       |
| 0.00E+00 | 1.14 | 0.789 | 0.499 | 0.00E+00 | Podocyte-1 | Qk          |
| 0.00E+00 | 1.13 | 0.636 | 0.072 | 0.00E+00 | Podocyte-1 | Smad6       |
| 0.00E+00 | 1.13 | 0.666 | 0.112 | 0.00E+00 | Podocyte-1 | Ddah2       |
| 0.00E+00 | 1.13 | 0.905 | 0.707 | 0.00E+00 | Podocyte-1 | Dynll1      |
| 0.00E+00 | 1.12 | 0.654 | 0.054 | 0.00E+00 | Podocyte-1 | Kank3       |
| 0.00E+00 | 1.12 | 0.823 | 0.52  | 0.00E+00 | Podocyte-1 | Itgb1       |
| 0.00E+00 | 1.12 | 0.641 | 0.046 | 0.00E+00 | Podocyte-1 | Elk3        |
| 0.00E+00 | 1.11 | 0.661 | 0.073 | 0.00E+00 | Podocyte-1 | Tgfb1       |
| 0.00E+00 | 1.11 | 0.629 | 0.034 | 0.00E+00 | Podocyte-1 | Grasp       |
| 0.00E+00 | 1.11 | 0.676 | 0.085 | 0.00E+00 | Podocyte-1 | Tspan15     |
| 0.00E+00 | 1.10 | 0.853 | 0.63  | 0.00E+00 | Podocyte-1 | Drap1       |
| 0.00E+00 | 1.08 | 0.617 | 0.027 | 0.00E+00 | Podocyte-1 | Lrrc8c      |
| 0.00E+00 | 1.08 | 0.84  | 0.709 | 0.00E+00 | Podocyte-1 | Rdx         |
| 0.00E+00 | 1.08 | 0.66  | 0.208 | 0.00E+00 | Podocyte-1 | Limch1      |
| 0.00E+00 | 1.08 | 0.613 | 0.025 | 0.00E+00 | Podocyte-1 | Cldn15      |
| 0.00E+00 | 1.07 | 0.627 | 0.073 | 0.00E+00 | Podocyte-1 | Tuba1a      |
| 0.00E+00 | 1.07 | 0.654 | 0.062 | 0.00E+00 | Podocyte-1 | Mef2c       |
| 0.00E+00 | 1.05 | 0.705 | 0.31  | 0.00E+00 | Podocyte-1 | Bmpr2       |
| 0.00E+00 | 1.05 | 0.665 | 0.239 | 0.00E+00 | Podocyte-1 | Inpp5k      |
| 0.00E+00 | 1.05 | 0.695 | 0.305 | 0.00E+00 | Podocyte-1 | Mef2a       |
| 0.00E+00 | 1.04 | 0.72  | 0.279 | 0.00E+00 | Podocyte-1 | Tnfrsf1a    |
| 0.00E+00 | 1.04 | 0.876 | 0.506 | 0.00E+00 | Podocyte-1 | Nfkbia      |
| 0.00E+00 | 1.03 | 0.602 | 0.022 | 0.00E+00 | Podocyte-1 | Arap3       |
| 0.00E+00 | 1.03 | 0.67  | 0.242 | 0.00E+00 | Podocyte-1 | Plscr1      |
| 0.00E+00 | 1.03 | 0.738 | 0.321 | 0.00E+00 | Podocyte-1 | Aoep        |
| 0.00E+00 | 1.02 | 0.719 | 0.436 | 0.00E+00 | Podocyte-1 | Hipk2       |
| 0.00E+00 | 1.02 | 0.638 | 0.215 | 0.00E+00 | Podocyte-1 | Ptprg       |
| 0.00E+00 | 1.02 | 0.704 | 0.306 | 0.00E+00 | Podocyte-1 | Klf13       |
| 0.00E+00 | 1.01 | 0.945 | 0.688 | 0.00E+00 | Podocyte-1 | Txnip       |
| 0.00E+00 | 1.01 | 0.976 | 0.931 | 0.00E+00 | Podocyte-1 | Gnas        |
| 0.00E+00 | 1.01 | 0.629 | 0.188 | 0.00E+00 | Podocyte-1 | Adgrl2      |
| 0.00E+00 | 1.00 | 0.782 | 0.51  | 0.00E+00 | Podocyte-1 | Fermt2      |
| 0.00E+00 | 0.99 | 0.649 | 0.253 | 0.00E+00 | Podocyte-1 | Clec2d      |
| 0.00E+00 | 0.99 | 0.623 | 0.16  | 0.00E+00 | Podocyte-1 | 931406P16Ri |
| 0.00E+00 | 0.99 | 0.772 | 0.368 | 0.00E+00 | Podocyte-1 | Cd9         |
| 0.00E+00 | 0.98 | 0.74  | 0.423 | 0.00E+00 | Podocyte-1 | Macf1       |
| 0.00E+00 | 0.98 | 0.98  | 0.508 | 0.00E+00 | Podocyte-1 | Tmsb4x      |
| 0.00E+00 | 0.97 | 0.866 | 0.64  | 0.00E+00 | Podocyte-1 | Myl12a      |
| 0.00E+00 | 0.97 | 0.994 | 0.969 | 0.00E+00 | Podocyte-1 | Ptma        |
| 0.00E+00 | 0.96 | 0.696 | 0.313 | 0.00E+00 | Podocyte-1 | Lims2       |
| 0.00E+00 | 0.96 | 0.648 | 0.204 | 0.00E+00 | Podocyte-1 | Ets2        |
| 0.00E+00 | 0.96 | 0.754 | 0.302 | 0.00E+00 | Podocyte-1 | Arpc1b      |
| 0.00E+00 | 0.96 | 0.989 | 0.964 | 0.00E+00 | Podocyte-1 | Actb        |
| 0.00E+00 | 0.95 | 0.617 | 0.079 | 0.00E+00 | Podocyte-1 | Plekho1     |
| 0.00E+00 | 0.95 | 0.776 | 0.424 | 0.00E+00 | Podocyte-1 | Tmem50a     |
| 0.00E+00 | 0.95 | 0.671 | 0.298 | 0.00E+00 | Podocyte-1 | Serpinh1    |

|           |      |       |       |           |            |             |
|-----------|------|-------|-------|-----------|------------|-------------|
| 0.00E+00  | 0.95 | 0.616 | 0.247 | 0.00E+00  | Podocyte-1 | Col4a2      |
| 0.00E+00  | 0.94 | 0.603 | 0.149 | 0.00E+00  | Podocyte-1 | Arl4d       |
| 0.00E+00  | 0.94 | 0.64  | 0.146 | 0.00E+00  | Podocyte-1 | Tnfrsf2     |
| 0.00E+00  | 0.93 | 0.621 | 0.174 | 0.00E+00  | Podocyte-1 | Tgfr2       |
| 0.00E+00  | 0.93 | 0.681 | 0.318 | 0.00E+00  | Podocyte-1 | H2-T23      |
| 0.00E+00  | 0.93 | 0.778 | 0.53  | 0.00E+00  | Podocyte-1 | Gnb1        |
| 0.00E+00  | 0.92 | 0.687 | 0.183 | 0.00E+00  | Podocyte-1 | Bcam        |
| 0.00E+00  | 0.92 | 0.674 | 0.28  | 0.00E+00  | Podocyte-1 | Luzp1       |
| 0.00E+00  | 0.91 | 0.613 | 0.215 | 0.00E+00  | Podocyte-1 | 810025M15Ri |
| 0.00E+00  | 0.91 | 0.634 | 0.149 | 0.00E+00  | Podocyte-1 | Mfge8       |
| 0.00E+00  | 0.91 | 0.78  | 0.539 | 0.00E+00  | Podocyte-1 | Rap1b       |
| 0.00E+00  | 0.90 | 0.609 | 0.167 | 0.00E+00  | Podocyte-1 | Asap1       |
| 0.00E+00  | 0.89 | 0.871 | 0.71  | 0.00E+00  | Podocyte-1 | Calm2       |
| 0.00E+00  | 0.88 | 0.826 | 0.678 | 0.00E+00  | Podocyte-1 | Mtch1       |
| 0.00E+00  | 0.88 | 0.883 | 0.745 | 0.00E+00  | Podocyte-1 | Gnb2        |
| 0.00E+00  | 0.87 | 0.871 | 0.71  | 0.00E+00  | Podocyte-1 | Arpc3       |
| 0.00E+00  | 0.87 | 0.874 | 0.604 | 0.00E+00  | Podocyte-1 | Dusp1       |
| 0.00E+00  | 0.86 | 0.913 | 0.752 | 0.00E+00  | Podocyte-1 | S100a10     |
| 0.00E+00  | 0.81 | 0.626 | 0.25  | 0.00E+00  | Podocyte-1 | Serpinb6a   |
| 0.00E+00  | 0.80 | 0.617 | 0.234 | 0.00E+00  | Podocyte-1 | Lepr        |
| 0.00E+00  | 0.74 | 0.959 | 0.857 | 0.00E+00  | Podocyte-1 | App         |
| 0.00E+00  | 0.71 | 0.967 | 0.918 | 0.00E+00  | Podocyte-1 | H3f3a       |
| 0.00E+00  | 0.70 | 0.967 | 0.935 | 0.00E+00  | Podocyte-1 | Myl6        |
| 0.00E+00  | 0.70 | 0.851 | 0.403 | 0.00E+00  | Podocyte-1 | Sh3bgrl3    |
| 0.00E+00  | 0.66 | 0.979 | 0.957 | 0.00E+00  | Podocyte-1 | Rps3        |
| 0.00E+00  | 0.66 | 0.681 | 0.162 | 0.00E+00  | Podocyte-1 | Crip1       |
| 0.00E+00  | 0.59 | 0.99  | 0.962 | 0.00E+00  | Podocyte-1 | Rpl9        |
| 0.00E+00  | 0.58 | 0.995 | 0.984 | 0.00E+00  | Podocyte-1 | Eif1        |
| 2.20E-307 | 0.88 | 0.708 | 0.385 | 6.83E-303 | Podocyte-1 | Septin7     |
| 1.63E-304 | 0.85 | 0.977 | 0.893 | 5.06E-300 | Podocyte-1 | Timp3       |
| 1.90E-302 | 0.93 | 0.7   | 0.399 | 5.89E-298 | Podocyte-1 | Jup         |
| 1.90E-299 | 0.91 | 0.617 | 0.272 | 5.88E-295 | Podocyte-1 | Hyal2       |
| 2.45E-299 | 0.92 | 0.728 | 0.433 | 7.59E-295 | Podocyte-1 | Tpm3        |
| 3.39E-293 | 0.90 | 0.774 | 0.504 | 1.05E-288 | Podocyte-1 | Selenom     |
| 1.28E-291 | 0.55 | 0.981 | 0.956 | 3.97E-287 | Podocyte-1 | Rps4x       |
| 1.38E-290 | 0.73 | 0.844 | 0.744 | 4.29E-286 | Podocyte-1 | Selenok     |
| 4.93E-289 | 0.73 | 0.883 | 0.817 | 1.53E-284 | Podocyte-1 | Rhoa        |
| 1.34E-281 | 0.95 | 0.739 | 0.478 | 4.16E-277 | Podocyte-1 | Mgll        |
| 1.51E-280 | 0.77 | 0.851 | 0.755 | 4.67E-276 | Podocyte-1 | Arpc2       |
| 5.72E-280 | 0.54 | 0.984 | 0.945 | 1.77E-275 | Podocyte-1 | Rpl21       |
| 1.72E-276 | 0.65 | 0.962 | 0.931 | 5.34E-272 | Podocyte-1 | H3f3b       |
| 1.81E-276 | 0.85 | 0.65  | 0.335 | 5.62E-272 | Podocyte-1 | Wasf2       |
| 2.12E-272 | 0.81 | 0.601 | 0.271 | 6.55E-268 | Podocyte-1 | Arhgap29    |
| 3.04E-272 | 0.70 | 0.885 | 0.795 | 9.40E-268 | Podocyte-1 | Cfl1        |
| 8.65E-272 | 0.81 | 0.61  | 0.292 | 2.68E-267 | Podocyte-1 | Apbb2       |
| 4.49E-270 | 0.78 | 0.737 | 0.416 | 1.39E-265 | Podocyte-1 | Anxa5       |
| 2.73E-269 | 0.84 | 0.89  | 0.82  | 8.47E-265 | Podocyte-1 | Plscr2      |
| 1.62E-263 | 0.76 | 0.636 | 0.284 | 5.02E-259 | Podocyte-1 | Irf5        |
| 6.48E-262 | 0.81 | 0.671 | 0.369 | 2.01E-257 | Podocyte-1 | Cd151       |
| 9.69E-260 | 0.55 | 0.991 | 0.976 | 3.00E-255 | Podocyte-1 | Rps27       |
| 4.20E-259 | 0.76 | 0.63  | 0.287 | 1.30E-254 | Podocyte-1 | Tsc22d3     |
| 2.74E-255 | 0.83 | 0.735 | 0.514 | 8.49E-251 | Podocyte-1 | Tprgl       |
| 7.95E-253 | 0.80 | 0.644 | 0.344 | 2.46E-248 | Podocyte-1 | Akap13      |
| 2.97E-249 | 0.65 | 0.879 | 0.8   | 9.20E-245 | Podocyte-1 | Rbm39       |
| 3.31E-249 | 0.90 | 0.687 | 0.436 | 1.03E-244 | Podocyte-1 | Sh3bp5      |
| 7.38E-249 | 0.67 | 0.863 | 0.76  | 2.29E-244 | Podocyte-1 | Son         |
| 3.42E-247 | 0.76 | 0.78  | 0.655 | 1.06E-242 | Podocyte-1 | Rac1        |
| 1.09E-244 | 0.52 | 0.994 | 0.985 | 3.38E-240 | Podocyte-1 | Rps8        |
| 1.53E-242 | 0.57 | 0.954 | 0.903 | 4.73E-238 | Podocyte-1 | Ddx5        |
| 6.92E-240 | 0.75 | 0.777 | 0.644 | 2.15E-235 | Podocyte-1 | Sh3glb1     |
| 7.43E-239 | 0.91 | 0.76  | 0.547 | 2.30E-234 | Podocyte-1 | Rhoc        |
| 1.06E-238 | 0.70 | 0.745 | 0.443 | 3.29E-234 | Podocyte-1 | Selenow     |
| 1.82E-236 | 0.55 | 0.949 | 0.914 | 5.65E-232 | Podocyte-1 | Rpl3        |
| 9.18E-235 | 0.73 | 0.607 | 0.293 | 2.84E-230 | Podocyte-1 | Smco4       |

|           |      |       |       |           |            |             |
|-----------|------|-------|-------|-----------|------------|-------------|
| 1.12E-229 | 0.72 | 0.793 | 0.708 | 3.46E-225 | Podocyte-1 | Csnk1a1     |
| 7.87E-229 | 0.76 | 0.757 | 0.622 | 2.44E-224 | Podocyte-1 | Ywhab       |
| 2.38E-225 | 0.74 | 0.623 | 0.335 | 7.38E-221 | Podocyte-1 | Mapk3       |
| 1.13E-222 | 0.80 | 0.607 | 0.337 | 3.49E-218 | Podocyte-1 | Elf1        |
| 7.22E-222 | 0.77 | 0.602 | 0.325 | 2.24E-217 | Podocyte-1 | Xiap        |
| 9.56E-222 | 0.51 | 0.978 | 0.981 | 2.96E-217 | Podocyte-1 | Hsp90ab1    |
| 2.06E-216 | 0.52 | 0.97  | 0.943 | 6.40E-212 | Podocyte-1 | Rpl34       |
| 3.82E-211 | 0.76 | 0.691 | 0.456 | 1.18E-206 | Podocyte-1 | F11r        |
| 1.56E-210 | 0.70 | 0.924 | 0.645 | 4.84E-206 | Podocyte-1 | Ly6a        |
| 1.29E-208 | 0.75 | 0.669 | 0.449 | 3.99E-204 | Podocyte-1 | Gna11       |
| 9.28E-208 | 0.80 | 0.638 | 0.4   | 2.87E-203 | Podocyte-1 | Pitpnc1     |
| 6.10E-198 | 0.61 | 0.834 | 0.771 | 1.89E-193 | Podocyte-1 | Hmgb1       |
| 2.66E-196 | 0.78 | 0.697 | 0.49  | 8.25E-192 | Podocyte-1 | Arglu1      |
| 3.57E-194 | 0.75 | 0.607 | 0.355 | 1.11E-189 | Podocyte-1 | Sgms1       |
| 4.12E-189 | 0.78 | 0.681 | 0.515 | 1.28E-184 | Podocyte-1 | Cyb5r3      |
| 2.72E-187 | 0.65 | 0.795 | 0.714 | 8.41E-183 | Podocyte-1 | Pomp        |
| 1.44E-186 | 0.66 | 0.75  | 0.64  | 4.46E-182 | Podocyte-1 | Prkar1a     |
| 1.54E-185 | 0.59 | 0.809 | 0.733 | 4.78E-181 | Podocyte-1 | Cdc42       |
| 1.60E-184 | 0.52 | 0.871 | 0.805 | 4.96E-180 | Podocyte-1 | Rabac1      |
| 2.55E-183 | 0.62 | 0.757 | 0.634 | 7.90E-179 | Podocyte-1 | Arhgdia     |
| 8.85E-181 | 0.83 | 0.671 | 0.423 | 2.74E-176 | Podocyte-1 | Ier2        |
| 8.39E-179 | 0.52 | 0.872 | 0.8   | 2.60E-174 | Podocyte-1 | Rsrp1       |
| 2.57E-178 | 0.71 | 0.682 | 0.515 | 7.95E-174 | Podocyte-1 | Sptan1      |
| 5.34E-178 | 0.63 | 0.753 | 0.622 | 1.65E-173 | Podocyte-1 | 810037117Ri |
| 4.25E-175 | 0.58 | 0.789 | 0.7   | 1.32E-170 | Podocyte-1 | Ctnnb1      |
| 9.71E-174 | 0.61 | 0.828 | 0.724 | 3.01E-169 | Podocyte-1 | Tspo        |
| 1.24E-173 | 0.56 | 0.812 | 0.759 | 3.84E-169 | Podocyte-1 | Cnbp        |
| 1.58E-173 | 0.82 | 0.647 | 0.478 | 4.90E-169 | Podocyte-1 | Mapt        |
| 4.58E-172 | 0.71 | 0.647 | 0.461 | 1.42E-167 | Podocyte-1 | Ppp3ca      |
| 1.43E-170 | 0.66 | 0.694 | 0.528 | 4.44E-166 | Podocyte-1 | Ostf1       |
| 3.64E-170 | 0.75 | 0.729 | 0.538 | 1.13E-165 | Podocyte-1 | Ccnd1       |
| 3.76E-170 | 0.66 | 0.804 | 0.785 | 1.16E-165 | Podocyte-1 | H2az1       |
| 5.01E-167 | 0.71 | 0.602 | 0.391 | 1.55E-162 | Podocyte-1 | Ctdspl      |
| 7.52E-166 | 0.67 | 0.652 | 0.428 | 2.33E-161 | Podocyte-1 | Shisa5      |
| 3.08E-163 | 0.65 | 0.701 | 0.454 | 9.53E-159 | Podocyte-1 | Ucp2        |
| 3.58E-160 | 0.59 | 0.748 | 0.62  | 1.11E-155 | Podocyte-1 | Srsf3       |
| 4.46E-160 | 0.69 | 0.647 | 0.464 | 1.38E-155 | Podocyte-1 | Nfib        |
| 6.28E-160 | 0.64 | 0.641 | 0.432 | 1.95E-155 | Podocyte-1 | Myl12b      |
| 5.32E-158 | 0.67 | 0.636 | 0.455 | 1.65E-153 | Podocyte-1 | Pitpna      |
| 3.88E-157 | 0.54 | 0.805 | 0.718 | 1.20E-152 | Podocyte-1 | Aplp2       |
| 3.17E-154 | 0.61 | 0.745 | 0.676 | 9.82E-150 | Podocyte-1 | Kif5b       |
| 1.48E-153 | 0.59 | 0.727 | 0.625 | 4.59E-149 | Podocyte-1 | Snrpb       |
| 5.77E-152 | 0.63 | 0.641 | 0.457 | 1.79E-147 | Podocyte-1 | Tln1        |
| 2.84E-149 | 0.60 | 0.675 | 0.529 | 8.79E-145 | Podocyte-1 | Mbd2        |
| 7.14E-149 | 0.51 | 0.957 | 0.878 | 2.21E-144 | Podocyte-1 | Ctsl        |
| 5.01E-145 | 0.68 | 0.67  | 0.572 | 1.55E-140 | Podocyte-1 | Arhgef12    |
| 9.38E-145 | 0.51 | 0.789 | 0.775 | 2.91E-140 | Podocyte-1 | Morf4i1     |
| 3.30E-144 | 0.51 | 0.787 | 0.742 | 1.02E-139 | Podocyte-1 | Rbm3        |
| 4.58E-143 | 0.69 | 0.865 | 0.769 | 1.42E-138 | Podocyte-1 | Jun         |
| 8.69E-143 | 0.62 | 0.633 | 0.468 | 2.69E-138 | Podocyte-1 | Sbds        |
| 2.00E-142 | 0.54 | 0.756 | 0.704 | 6.20E-138 | Podocyte-1 | Arf5        |
| 2.12E-142 | 0.59 | 0.699 | 0.599 | 6.56E-138 | Podocyte-1 | Pura        |
| 6.53E-141 | 0.54 | 0.71  | 0.508 | 2.02E-136 | Podocyte-1 | S100a11     |
| 1.63E-140 | 0.66 | 0.674 | 0.519 | 5.05E-136 | Podocyte-1 | Atrx        |
| 4.52E-132 | 0.68 | 0.675 | 0.547 | 1.40E-127 | Podocyte-1 | Srsf7       |
| 7.23E-131 | 0.59 | 0.606 | 0.433 | 2.24E-126 | Podocyte-1 | 230219D22Ri |
| 5.80E-130 | 0.92 | 0.706 | 0.546 | 1.80E-125 | Podocyte-1 | Junb        |
| 2.33E-129 | 0.55 | 0.649 | 0.497 | 7.23E-125 | Podocyte-1 | Syf2        |
| 4.58E-128 | 0.61 | 0.642 | 0.489 | 1.42E-123 | Podocyte-1 | Lmna        |
| 4.17E-127 | 0.58 | 0.636 | 0.489 | 1.29E-122 | Podocyte-1 | Rap1a       |
| 8.82E-127 | 0.56 | 0.733 | 0.658 | 2.73E-122 | Podocyte-1 | Pttg1ip     |
| 1.50E-124 | 0.58 | 0.67  | 0.552 | 4.65E-120 | Podocyte-1 | Kmt2e       |
| 7.68E-119 | 0.59 | 0.666 | 0.576 | 2.38E-114 | Podocyte-1 | Purb        |
| 1.48E-116 | 0.53 | 0.713 | 0.664 | 4.59E-112 | Podocyte-1 | Rrbp1       |

|           |      |       |       |           |            |          |
|-----------|------|-------|-------|-----------|------------|----------|
| 4.21E-115 | 0.56 | 0.647 | 0.519 | 1.30E-110 | Podocyte-1 | Hras     |
| 2.08E-113 | 0.55 | 0.617 | 0.475 | 6.46E-109 | Podocyte-1 | Sfr1     |
| 1.23E-112 | 0.55 | 0.722 | 0.662 | 3.80E-108 | Podocyte-1 | Fus      |
| 1.41E-112 | 0.56 | 0.705 | 0.635 | 4.37E-108 | Podocyte-1 | Mcl1     |
| 6.80E-112 | 0.52 | 0.823 | 0.767 | 2.11E-107 | Podocyte-1 | Tsc22d1  |
| 1.43E-111 | 0.57 | 0.603 | 0.451 | 4.42E-107 | Podocyte-1 | Nucb1    |
| 1.08E-110 | 0.55 | 0.634 | 0.512 | 3.34E-106 | Podocyte-1 | Rock1    |
| 5.34E-110 | 0.52 | 0.707 | 0.635 | 1.65E-105 | Podocyte-1 | Sf3b1    |
| 2.57E-109 | 0.57 | 0.842 | 0.854 | 7.97E-105 | Podocyte-1 | Jund     |
| 4.13E-108 | 0.56 | 0.615 | 0.438 | 1.28E-103 | Podocyte-1 | Slc38a2  |
| 2.22E-104 | 0.50 | 0.709 | 0.662 | 6.87E-100 | Podocyte-1 | Tmem234  |
| 1.33E-103 | 0.54 | 0.627 | 0.492 | 4.13E-99  | Podocyte-1 | Mbnl2    |
| 9.94E-103 | 0.52 | 0.619 | 0.492 | 3.08E-98  | Podocyte-1 | Ccdc12   |
| 4.59E-97  | 0.50 | 0.635 | 0.527 | 1.42E-92  | Podocyte-1 | Tmed9    |
| 1.09E-86  | 0.51 | 0.637 | 0.57  | 3.38E-82  | Podocyte-1 | Lrrc58   |
| 3.63E-83  | 0.53 | 0.602 | 0.515 | 1.12E-78  | Podocyte-1 | Reep3    |
| 6.64E-56  | 0.53 | 0.664 | 0.584 | 2.06E-51  | Podocyte-1 | Fos      |
| 0.00E+00  | 3.29 | 0.911 | 0.127 | 0.00E+00  | Podocyte-2 | Cdkn1c   |
| 0.00E+00  | 3.04 | 0.926 | 0.079 | 0.00E+00  | Podocyte-2 | Nphs2    |
| 0.00E+00  | 2.97 | 0.869 | 0.13  | 0.00E+00  | Podocyte-2 | H2-Q7    |
| 0.00E+00  | 2.96 | 0.873 | 0.252 | 0.00E+00  | Podocyte-2 | EGFP     |
| 0.00E+00  | 2.93 | 0.941 | 0.173 | 0.00E+00  | Podocyte-2 | Podxl    |
| 0.00E+00  | 2.75 | 0.837 | 0.047 | 0.00E+00  | Podocyte-2 | Clic3    |
| 0.00E+00  | 2.73 | 0.903 | 0.103 | 0.00E+00  | Podocyte-2 | Nupr1    |
| 0.00E+00  | 2.67 | 0.883 | 0.12  | 0.00E+00  | Podocyte-2 | H2-Q6    |
| 0.00E+00  | 2.50 | 0.847 | 0.03  | 0.00E+00  | Podocyte-2 | Nphs1    |
| 0.00E+00  | 2.50 | 0.894 | 0.188 | 0.00E+00  | Podocyte-2 | Sparc    |
| 0.00E+00  | 2.29 | 0.811 | 0.088 | 0.00E+00  | Podocyte-2 | Rasl11a  |
| 0.00E+00  | 2.27 | 0.816 | 0.048 | 0.00E+00  | Podocyte-2 | Thsd7a   |
| 0.00E+00  | 2.25 | 0.79  | 0.047 | 0.00E+00  | Podocyte-2 | Cldn5    |
| 0.00E+00  | 2.21 | 0.803 | 0.064 | 0.00E+00  | Podocyte-2 | Sema3g   |
| 0.00E+00  | 2.12 | 0.856 | 0.094 | 0.00E+00  | Podocyte-2 | Synpo    |
| 0.00E+00  | 2.08 | 0.854 | 0.177 | 0.00E+00  | Podocyte-2 | Mafb     |
| 0.00E+00  | 2.08 | 0.801 | 0.167 | 0.00E+00  | Podocyte-2 | Gsn      |
| 0.00E+00  | 2.05 | 0.85  | 0.206 | 0.00E+00  | Podocyte-2 | Dpp4     |
| 0.00E+00  | 2.00 | 0.847 | 0.031 | 0.00E+00  | Podocyte-2 | Wt1      |
| 0.00E+00  | 1.94 | 0.765 | 0.132 | 0.00E+00  | Podocyte-2 | Magi2    |
| 0.00E+00  | 1.92 | 0.725 | 0.034 | 0.00E+00  | Podocyte-2 | Ptpro    |
| 0.00E+00  | 1.89 | 0.873 | 0.23  | 0.00E+00  | Podocyte-2 | Tmsb10   |
| 0.00E+00  | 1.89 | 0.712 | 0.023 | 0.00E+00  | Podocyte-2 | Rab3b    |
| 0.00E+00  | 1.88 | 0.847 | 0.145 | 0.00E+00  | Podocyte-2 | Tm4sf1   |
| 0.00E+00  | 1.86 | 0.758 | 0.071 | 0.00E+00  | Podocyte-2 | Angptl2  |
| 0.00E+00  | 1.79 | 0.729 | 0.096 | 0.00E+00  | Podocyte-2 | Cmtm7    |
| 0.00E+00  | 1.76 | 0.674 | 0.017 | 0.00E+00  | Podocyte-2 | Tcf21    |
| 0.00E+00  | 1.71 | 0.733 | 0.076 | 0.00E+00  | Podocyte-2 | Nes      |
| 0.00E+00  | 1.69 | 0.78  | 0.168 | 0.00E+00  | Podocyte-2 | Anxa2    |
| 0.00E+00  | 1.68 | 0.739 | 0.123 | 0.00E+00  | Podocyte-2 | Golim4   |
| 0.00E+00  | 1.68 | 0.659 | 0.024 | 0.00E+00  | Podocyte-2 | Mmp23    |
| 0.00E+00  | 1.66 | 0.689 | 0.031 | 0.00E+00  | Podocyte-2 | Hs3st6   |
| 0.00E+00  | 1.65 | 0.695 | 0.036 | 0.00E+00  | Podocyte-2 | Srgap1   |
| 0.00E+00  | 1.64 | 0.731 | 0.067 | 0.00E+00  | Podocyte-2 | Rhpn1    |
| 0.00E+00  | 1.61 | 0.716 | 0.033 | 0.00E+00  | Podocyte-2 | Tmem150c |
| 0.00E+00  | 1.51 | 0.678 | 0.06  | 0.00E+00  | Podocyte-2 | Gpsm3    |
| 0.00E+00  | 1.50 | 0.61  | 0.028 | 0.00E+00  | Podocyte-2 | Aplp1    |
| 0.00E+00  | 1.41 | 0.729 | 0.101 | 0.00E+00  | Podocyte-2 | Vim      |
| 0.00E+00  | 1.38 | 0.64  | 0.035 | 0.00E+00  | Podocyte-2 | Myom2    |
| 0.00E+00  | 1.37 | 0.612 | 0.015 | 0.00E+00  | Podocyte-2 | Ddn      |
| 0.00E+00  | 1.36 | 0.617 | 0.027 | 0.00E+00  | Podocyte-2 | Shisa3   |
| 0.00E+00  | 1.36 | 0.669 | 0.107 | 0.00E+00  | Podocyte-2 | Tspan15  |
| 0.00E+00  | 1.33 | 0.627 | 0.05  | 0.00E+00  | Podocyte-2 | Npr1     |
| 0.00E+00  | 1.31 | 0.667 | 0.097 | 0.00E+00  | Podocyte-2 | Anxa3    |
| 0.00E+00  | 1.25 | 0.85  | 0.16  | 0.00E+00  | Podocyte-2 | Plat     |
| 0.00E+00  | 1.24 | 0.631 | 0.094 | 0.00E+00  | Podocyte-2 | Marveld1 |
| 1.49E-305 | 2.12 | 0.792 | 0.2   | 4.62E-301 | Podocyte-2 | Bcam     |



|           |      |       |       |           |            |          |
|-----------|------|-------|-------|-----------|------------|----------|
| 4.42E-293 | 1.36 | 0.712 | 0.157 | 1.37E-288 | Podocyte-2 | Lrrfip1  |
| 3.26E-281 | 2.29 | 0.831 | 0.273 | 1.01E-276 | Podocyte-2 | Enpep    |
| 6.35E-270 | 1.87 | 0.809 | 0.249 | 1.97E-265 | Podocyte-2 | Cd59a    |
| 8.15E-269 | 2.03 | 0.742 | 0.196 | 2.52E-264 | Podocyte-2 | Aebp1    |
| 4.11E-266 | 2.63 | 0.987 | 0.525 | 1.27E-261 | Podocyte-2 | Tmsb4x   |
| 1.11E-260 | 1.46 | 0.744 | 0.204 | 3.43E-256 | Podocyte-2 | Tmod3    |
| 4.11E-259 | 1.13 | 0.744 | 0.166 | 1.27E-254 | Podocyte-2 | Slc9a3r2 |
| 2.27E-244 | 1.61 | 0.682 | 0.176 | 7.05E-240 | Podocyte-2 | Metrn1   |
| 5.22E-243 | 1.58 | 0.784 | 0.237 | 1.62E-238 | Podocyte-2 | Cryab    |
| 2.10E-239 | 1.30 | 0.682 | 0.177 | 6.52E-235 | Podocyte-2 | Efnb1    |
| 3.63E-227 | 1.33 | 0.695 | 0.195 | 1.12E-222 | Podocyte-2 | Ripor1   |
| 1.45E-221 | 1.78 | 0.903 | 0.51  | 4.49E-217 | Podocyte-2 | Vegfa    |
| 3.34E-219 | 1.94 | 0.858 | 0.396 | 1.03E-214 | Podocyte-2 | Itgb5    |
| 1.64E-215 | 1.25 | 0.627 | 0.161 | 5.08E-211 | Podocyte-2 | Mgat5    |
| 3.19E-213 | 1.16 | 0.614 | 0.151 | 9.90E-209 | Podocyte-2 | Pdlim2   |
| 4.47E-205 | 1.46 | 0.735 | 0.25  | 1.38E-200 | Podocyte-2 | Gas1     |
| 2.02E-196 | 1.74 | 0.867 | 0.415 | 6.26E-192 | Podocyte-2 | Ifitm2   |
| 1.67E-195 | 1.64 | 0.807 | 0.351 | 5.17E-191 | Podocyte-2 | Npnt     |
| 1.48E-189 | 1.33 | 0.633 | 0.189 | 4.60E-185 | Podocyte-2 | Plod2    |
| 2.82E-186 | 1.57 | 0.784 | 0.335 | 8.74E-182 | Podocyte-2 | Gadd45a  |
| 7.73E-186 | 1.36 | 0.733 | 0.276 | 2.39E-181 | Podocyte-2 | Septin11 |
| 8.10E-184 | 1.72 | 0.809 | 0.392 | 2.51E-179 | Podocyte-2 | Col4a3   |
| 8.95E-183 | 2.08 | 0.992 | 0.922 | 2.77E-178 | Podocyte-2 | Igfbp7   |
| 8.59E-182 | 1.15 | 0.636 | 0.189 | 2.66E-177 | Podocyte-2 | St3gal6  |
| 7.87E-173 | 1.39 | 0.731 | 0.285 | 2.44E-168 | Podocyte-2 | Clic5    |
| 8.98E-169 | 1.33 | 0.775 | 0.335 | 2.78E-164 | Podocyte-2 | Aoep     |
| 8.77E-168 | 1.38 | 0.731 | 0.314 | 2.72E-163 | Podocyte-2 | Mpp5     |
| 4.58E-163 | 1.42 | 0.703 | 0.274 | 1.42E-158 | Podocyte-2 | Ifngr1   |
| 2.25E-162 | 1.44 | 0.966 | 0.81  | 6.98E-158 | Podocyte-2 | Sdc4     |
| 5.65E-161 | 1.76 | 0.994 | 0.99  | 1.75E-156 | Podocyte-2 | Itm2b    |
| 6.31E-156 | 1.23 | 0.941 | 0.798 | 1.96E-151 | Podocyte-2 | Pth1r    |
| 1.22E-154 | 1.55 | 0.873 | 0.654 | 3.77E-150 | Podocyte-2 | Eif3m    |
| 3.30E-152 | 1.11 | 0.64  | 0.228 | 1.02E-147 | Podocyte-2 | Mob2     |
| 1.01E-151 | 1.57 | 0.807 | 0.47  | 3.14E-147 | Podocyte-2 | Htra1    |
| 2.35E-148 | 1.59 | 0.898 | 0.715 | 7.27E-144 | Podocyte-2 | Calm2    |
| 3.53E-148 | 1.62 | 0.833 | 0.513 | 1.09E-143 | Podocyte-2 | S100a11  |
| 3.66E-148 | 1.16 | 0.966 | 0.936 | 1.13E-143 | Podocyte-2 | Myl6     |
| 1.92E-145 | 1.45 | 0.731 | 0.356 | 5.95E-141 | Podocyte-2 | Man1a2   |
| 1.38E-141 | 1.02 | 0.621 | 0.227 | 4.28E-137 | Podocyte-2 | Pak1     |
| 4.92E-140 | 1.66 | 0.939 | 0.879 | 1.52E-135 | Podocyte-2 | Cd81     |
| 3.27E-137 | 1.56 | 0.9   | 0.736 | 1.01E-132 | Podocyte-2 | Laptm4a  |
| 5.05E-135 | 1.48 | 0.858 | 0.648 | 1.56E-130 | Podocyte-2 | Myl12a   |
| 8.99E-134 | 1.25 | 0.799 | 0.515 | 2.79E-129 | Podocyte-2 | Wsb2     |
| 2.77E-129 | 1.16 | 0.672 | 0.305 | 8.59E-125 | Podocyte-2 | Iqgap2   |
| 2.99E-126 | 1.51 | 0.716 | 0.38  | 9.26E-122 | Podocyte-2 | Cd151    |
| 3.87E-124 | 1.08 | 0.731 | 0.364 | 1.20E-119 | Podocyte-2 | Pmepa1   |
| 2.81E-118 | 1.01 | 0.619 | 0.263 | 8.71E-114 | Podocyte-2 | Nsf      |
| 4.16E-118 | 1.30 | 0.79  | 0.524 | 1.29E-113 | Podocyte-2 | Col4a4   |
| 1.41E-115 | 1.10 | 0.78  | 0.481 | 4.37E-111 | Podocyte-2 | Mapt     |
| 4.07E-115 | 1.16 | 0.686 | 0.348 | 1.26E-110 | Podocyte-2 | Ildr2    |
| 9.55E-114 | 1.14 | 0.727 | 0.426 | 2.96E-109 | Podocyte-2 | Arhgap24 |
| 1.84E-109 | 0.93 | 0.665 | 0.317 | 5.69E-105 | Podocyte-2 | Mylk     |
| 1.93E-108 | 1.32 | 0.773 | 0.531 | 5.96E-104 | Podocyte-2 | Itgb1    |
| 2.99E-108 | 0.90 | 0.689 | 0.298 | 9.25E-104 | Podocyte-2 | Aif1l    |
| 1.82E-105 | 0.99 | 0.956 | 0.92  | 5.65E-101 | Podocyte-2 | H3f3a    |
| 5.78E-104 | 1.10 | 0.636 | 0.296 | 1.79E-99  | Podocyte-2 | Col18a1  |
| 3.40E-102 | 1.06 | 0.661 | 0.356 | 1.05E-97  | Podocyte-2 | Parva    |
| 1.27E-101 | 1.13 | 0.644 | 0.299 | 3.94E-97  | Podocyte-2 | Tsc22d3  |
| 5.10E-99  | 1.17 | 0.68  | 0.385 | 1.58E-94  | Podocyte-2 | Dag1     |
| 3.82E-96  | 0.91 | 0.818 | 0.66  | 1.18E-91  | Podocyte-2 | Actn4    |
| 9.79E-92  | 1.04 | 0.862 | 0.832 | 3.03E-87  | Podocyte-2 | Ndfip1   |
| 1.11E-91  | 1.16 | 0.672 | 0.412 | 3.44E-87  | Podocyte-2 | Cpq      |
| 7.37E-91  | 1.06 | 0.934 | 0.881 | 2.28E-86  | Podocyte-2 | Ctsl     |
| 8.18E-90  | 0.96 | 0.758 | 0.462 | 2.53E-85  | Podocyte-2 | Ucp2     |

|          |      |       |       |          |            |             |
|----------|------|-------|-------|----------|------------|-------------|
| 4.02E-89 | 1.08 | 0.797 | 0.683 | 1.25E-84 | Podocyte-2 | Mtch1       |
| 1.86E-88 | 0.93 | 0.617 | 0.295 | 5.76E-84 | Podocyte-2 | Gsta4       |
| 1.11E-86 | 0.85 | 0.833 | 0.71  | 3.45E-82 | Podocyte-2 | Csnk1a1     |
| 3.78E-85 | 0.95 | 0.742 | 0.51  | 1.17E-80 | Podocyte-2 | Qk          |
| 6.65E-85 | 1.02 | 0.646 | 0.362 | 2.06E-80 | Podocyte-2 | Palld       |
| 5.40E-81 | 1.13 | 0.646 | 0.368 | 1.67E-76 | Podocyte-2 | Kcnq1ot1    |
| 1.13E-79 | 0.93 | 0.608 | 0.323 | 3.49E-75 | Podocyte-2 | Tpm1        |
| 1.01E-75 | 0.85 | 0.881 | 0.846 | 3.13E-71 | Podocyte-2 | Tmem59      |
| 2.32E-74 | 1.00 | 0.807 | 0.625 | 7.19E-70 | Podocyte-2 | H2-D1       |
| 3.92E-73 | 0.68 | 0.941 | 0.933 | 1.22E-68 | Podocyte-2 | Gnas        |
| 2.01E-70 | 0.59 | 0.97  | 0.946 | 6.24E-66 | Podocyte-2 | Rpl21       |
| 6.94E-68 | 0.88 | 0.729 | 0.564 | 2.15E-63 | Podocyte-2 | Cd2ap       |
| 1.68E-66 | 0.99 | 0.623 | 0.391 | 5.21E-62 | Podocyte-2 | P3h2        |
| 2.55E-64 | 0.89 | 0.799 | 0.76  | 7.89E-60 | Podocyte-2 | Selenof     |
| 3.33E-64 | 0.79 | 0.97  | 0.965 | 1.03E-59 | Podocyte-2 | Actb        |
| 1.22E-62 | 0.77 | 0.833 | 0.823 | 3.79E-58 | Podocyte-2 | Vdac2       |
| 1.32E-59 | 0.83 | 0.657 | 0.439 | 4.09E-55 | Podocyte-2 | Tmem50a     |
| 1.59E-59 | 0.72 | 0.841 | 0.697 | 4.93E-55 | Podocyte-2 | Lpl         |
| 2.45E-59 | 0.79 | 0.646 | 0.447 | 7.59E-55 | Podocyte-2 | Mtss1       |
| 1.04E-58 | 0.69 | 0.809 | 0.787 | 3.23E-54 | Podocyte-2 | Dad1        |
| 7.28E-58 | 0.73 | 0.811 | 0.759 | 2.26E-53 | Podocyte-2 | Arpc2       |
| 1.15E-56 | 0.88 | 0.629 | 0.439 | 3.57E-52 | Podocyte-2 | Pdia6       |
| 2.02E-56 | 0.81 | 0.672 | 0.52  | 6.27E-52 | Podocyte-2 | Slc48a1     |
| 8.85E-56 | 0.67 | 0.875 | 0.862 | 2.74E-51 | Podocyte-2 | App         |
| 3.06E-52 | 0.70 | 0.809 | 0.788 | 9.49E-48 | Podocyte-2 | Atp6v0e     |
| 5.34E-52 | 0.59 | 0.907 | 0.877 | 1.65E-47 | Podocyte-2 | Ptms        |
| 9.69E-49 | 0.63 | 0.858 | 0.769 | 3.00E-44 | Podocyte-2 | Tsc22d1     |
| 1.19E-48 | 0.74 | 0.75  | 0.678 | 3.68E-44 | Podocyte-2 | Kif5b       |
| 3.56E-48 | 0.78 | 0.669 | 0.563 | 1.10E-43 | Podocyte-2 | Nap11i      |
| 4.19E-48 | 0.85 | 0.703 | 0.627 | 1.30E-43 | Podocyte-2 | 810037117Ri |
| 8.18E-45 | 0.71 | 0.805 | 0.809 | 2.53E-40 | Podocyte-2 | Rabac1      |
| 1.32E-44 | 0.76 | 0.659 | 0.558 | 4.08E-40 | Podocyte-2 | Degs1       |
| 1.28E-43 | 0.57 | 0.788 | 0.716 | 3.96E-39 | Podocyte-2 | Dynll1      |
| 3.20E-39 | 0.61 | 0.602 | 0.454 | 9.91E-35 | Podocyte-2 | Ptprd       |
| 4.17E-39 | 0.75 | 0.629 | 0.531 | 1.29E-34 | Podocyte-2 | Tmed9       |
| 5.75E-39 | 0.61 | 0.775 | 0.722 | 1.78E-34 | Podocyte-2 | Aplp2       |
| 6.28E-39 | 0.57 | 0.773 | 0.697 | 1.95E-34 | Podocyte-2 | H2-K1       |
| 6.18E-38 | 0.54 | 0.803 | 0.765 | 1.91E-33 | Podocyte-2 | Son         |
| 1.34E-36 | 0.65 | 0.703 | 0.661 | 4.16E-32 | Podocyte-2 | Pttg1ip     |
| 3.57E-36 | 0.62 | 0.657 | 0.592 | 1.11E-31 | Podocyte-2 | Emc7        |
| 4.83E-35 | 0.54 | 0.761 | 0.75  | 1.50E-30 | Podocyte-2 | Sumo2       |
| 3.54E-34 | 0.55 | 0.646 | 0.522 | 1.10E-29 | Podocyte-2 | Fermt2      |
| 4.51E-33 | 0.72 | 0.629 | 0.556 | 1.40E-28 | Podocyte-2 | Smim1       |
| 3.55E-32 | 0.75 | 0.617 | 0.522 | 1.10E-27 | Podocyte-2 | Cyb5r3      |
| 1.66E-31 | 0.57 | 0.674 | 0.645 | 5.14E-27 | Podocyte-2 | BC031181    |
| 2.23E-31 | 0.64 | 0.665 | 0.58  | 6.92E-27 | Podocyte-2 | Ctsh        |
| 3.66E-31 | 0.57 | 0.68  | 0.628 | 1.14E-26 | Podocyte-2 | Wls         |
| 1.75E-30 | 0.57 | 0.691 | 0.65  | 5.41E-26 | Podocyte-2 | Sh3glb1     |
| 1.96E-29 | 0.57 | 0.682 | 0.662 | 6.08E-25 | Podocyte-2 | Spes1       |
| 8.62E-29 | 0.51 | 0.739 | 0.745 | 2.67E-24 | Podocyte-2 | Rbm3        |
| 3.07E-27 | 0.52 | 0.75  | 0.741 | 9.52E-23 | Podocyte-2 | Hsp90b1     |
| 3.30E-27 | 0.54 | 0.638 | 0.568 | 1.02E-22 | Podocyte-2 | Reep5       |
| 4.62E-26 | 0.50 | 0.693 | 0.68  | 1.43E-21 | Podocyte-2 | Tspan3      |
| 1.04E-22 | 0.53 | 0.655 | 0.64  | 3.21E-18 | Podocyte-2 | Arhgdia     |
| 5.42E-19 | 0.51 | 0.627 | 0.622 | 1.68E-14 | Podocyte-2 | Sap18       |
| 1.30E-17 | 0.51 | 0.604 | 0.577 | 4.03E-13 | Podocyte-2 | Arhgef12    |
| 0.00E+00 | 3.13 | 0.677 | 0.023 | 0.00E+00 | Podocyte-3 | Mgp         |
| 0.00E+00 | 2.80 | 0.973 | 0.098 | 0.00E+00 | Podocyte-3 | Vim         |
| 0.00E+00 | 2.77 | 1     | 0.143 | 0.00E+00 | Podocyte-3 | Tm4sf1      |
| 0.00E+00 | 2.56 | 0.975 | 0.176 | 0.00E+00 | Podocyte-3 | Crip1       |
| 0.00E+00 | 2.52 | 0.993 | 0.19  | 0.00E+00 | Podocyte-3 | Ly6c1       |
| 0.00E+00 | 2.51 | 0.998 | 0.24  | 0.00E+00 | Podocyte-3 | Klf2        |
| 0.00E+00 | 2.51 | 0.941 | 0.244 | 0.00E+00 | Podocyte-3 | Klf4        |
| 0.00E+00 | 2.51 | 0.977 | 0.112 | 0.00E+00 | Podocyte-3 | S100a6      |

|          |      |       |       |          |            |          |
|----------|------|-------|-------|----------|------------|----------|
| 0.00E+00 | 2.51 | 0.81  | 0.201 | 0.00E+00 | Podocyte-3 | Tspan8   |
| 0.00E+00 | 2.37 | 0.991 | 0.136 | 0.00E+00 | Podocyte-3 | Ifitm3   |
| 0.00E+00 | 2.12 | 0.923 | 0.271 | 0.00E+00 | Podocyte-3 | Cdkn1a   |
| 0.00E+00 | 2.00 | 0.901 | 0.159 | 0.00E+00 | Podocyte-3 | Hspb1    |
| 0.00E+00 | 1.96 | 0.862 | 0.017 | 0.00E+00 | Podocyte-3 | Fbln5    |
| 0.00E+00 | 1.96 | 0.98  | 0.162 | 0.00E+00 | Podocyte-3 | Slc9a3r2 |
| 0.00E+00 | 1.94 | 0.928 | 0.06  | 0.00E+00 | Podocyte-3 | Adgr4    |
| 0.00E+00 | 1.92 | 0.788 | 0.022 | 0.00E+00 | Podocyte-3 | S100a4   |
| 0.00E+00 | 1.92 | 0.914 | 0.031 | 0.00E+00 | Podocyte-3 | Sox17    |
| 0.00E+00 | 1.90 | 0.919 | 0.115 | 0.00E+00 | Podocyte-3 | Ehd4     |
| 0.00E+00 | 1.90 | 0.86  | 0.033 | 0.00E+00 | Podocyte-3 | Cd93     |
| 0.00E+00 | 1.89 | 0.937 | 0.148 | 0.00E+00 | Podocyte-3 | Cd200    |
| 0.00E+00 | 1.88 | 0.926 | 0.128 | 0.00E+00 | Podocyte-3 | Ramp2    |
| 0.00E+00 | 1.85 | 0.95  | 0.228 | 0.00E+00 | Podocyte-3 | Epas1    |
| 0.00E+00 | 1.83 | 0.953 | 0.223 | 0.00E+00 | Podocyte-3 | Crip2    |
| 0.00E+00 | 1.80 | 0.93  | 0.175 | 0.00E+00 | Podocyte-3 | Tinagl1  |
| 0.00E+00 | 1.80 | 0.901 | 0.073 | 0.00E+00 | Podocyte-3 | Ptprb    |
| 0.00E+00 | 1.79 | 0.878 | 0.049 | 0.00E+00 | Podocyte-3 | Ebf1     |
| 0.00E+00 | 1.72 | 0.919 | 0.075 | 0.00E+00 | Podocyte-3 | Pecam1   |
| 0.00E+00 | 1.69 | 0.709 | 0.028 | 0.00E+00 | Podocyte-3 | Edn1     |
| 0.00E+00 | 1.69 | 0.923 | 0.089 | 0.00E+00 | Podocyte-3 | Adgrf5   |
| 0.00E+00 | 1.63 | 0.912 | 0.109 | 0.00E+00 | Podocyte-3 | Meis2    |
| 0.00E+00 | 1.59 | 0.957 | 0.094 | 0.00E+00 | Podocyte-3 | Egfl7    |
| 0.00E+00 | 1.57 | 0.749 | 0.042 | 0.00E+00 | Podocyte-3 | Ltbp4    |
| 0.00E+00 | 1.56 | 0.808 | 0.04  | 0.00E+00 | Podocyte-3 | Thbd     |
| 0.00E+00 | 1.53 | 0.912 | 0.104 | 0.00E+00 | Podocyte-3 | Fxyd5    |
| 0.00E+00 | 1.51 | 0.926 | 0.098 | 0.00E+00 | Podocyte-3 | Esam     |
| 0.00E+00 | 1.48 | 0.745 | 0.005 | 0.00E+00 | Podocyte-3 | Fbln2    |
| 0.00E+00 | 1.46 | 0.837 | 0.048 | 0.00E+00 | Podocyte-3 | S1pr1    |
| 0.00E+00 | 1.43 | 0.792 | 0.058 | 0.00E+00 | Podocyte-3 | Ccnd2    |
| 0.00E+00 | 1.43 | 0.919 | 0.188 | 0.00E+00 | Podocyte-3 | Sparc    |
| 0.00E+00 | 1.42 | 0.959 | 0.125 | 0.00E+00 | Podocyte-3 | Srgn     |
| 0.00E+00 | 1.38 | 0.815 | 0.06  | 0.00E+00 | Podocyte-3 | Cdh5     |
| 0.00E+00 | 1.37 | 0.842 | 0.058 | 0.00E+00 | Podocyte-3 | Icam2    |
| 0.00E+00 | 1.37 | 0.856 | 0.065 | 0.00E+00 | Podocyte-3 | Cavin3   |
| 0.00E+00 | 1.36 | 0.758 | 0.043 | 0.00E+00 | Podocyte-3 | Pltp     |
| 0.00E+00 | 1.36 | 0.761 | 0.04  | 0.00E+00 | Podocyte-3 | Clec14a  |
| 0.00E+00 | 1.35 | 0.849 | 0.074 | 0.00E+00 | Podocyte-3 | Fit1     |
| 0.00E+00 | 1.35 | 0.804 | 0.056 | 0.00E+00 | Podocyte-3 | Acvrl1   |
| 0.00E+00 | 1.35 | 0.677 | 0.044 | 0.00E+00 | Podocyte-3 | Rsad2    |
| 0.00E+00 | 1.32 | 0.795 | 0.052 | 0.00E+00 | Podocyte-3 | Lmo2     |
| 0.00E+00 | 1.28 | 0.817 | 0.065 | 0.00E+00 | Podocyte-3 | Sema3g   |
| 0.00E+00 | 1.28 | 0.79  | 0.039 | 0.00E+00 | Podocyte-3 | Ecscr    |
| 0.00E+00 | 1.25 | 0.792 | 0.059 | 0.00E+00 | Podocyte-3 | Pi16     |
| 0.00E+00 | 1.24 | 0.67  | 0.081 | 0.00E+00 | Podocyte-3 | Jag1     |
| 0.00E+00 | 1.24 | 0.914 | 0.174 | 0.00E+00 | Podocyte-3 | Podxl    |
| 0.00E+00 | 1.23 | 0.783 | 0.083 | 0.00E+00 | Podocyte-3 | Emp3     |
| 0.00E+00 | 1.23 | 0.758 | 0.056 | 0.00E+00 | Podocyte-3 | Heg1     |
| 0.00E+00 | 1.23 | 0.867 | 0.079 | 0.00E+00 | Podocyte-3 | Eng      |
| 0.00E+00 | 1.22 | 0.79  | 0.096 | 0.00E+00 | Podocyte-3 | Anxa3    |
| 0.00E+00 | 1.21 | 0.817 | 0.073 | 0.00E+00 | Podocyte-3 | Gimap6   |
| 0.00E+00 | 1.21 | 0.727 | 0.013 | 0.00E+00 | Podocyte-3 | Jam2     |
| 0.00E+00 | 1.21 | 0.668 | 0.027 | 0.00E+00 | Podocyte-3 | Apold1   |
| 0.00E+00 | 1.20 | 0.659 | 0.042 | 0.00E+00 | Podocyte-3 | Calcr1   |
| 0.00E+00 | 1.20 | 0.684 | 0.029 | 0.00E+00 | Podocyte-3 | Lrrc32   |
| 0.00E+00 | 1.18 | 0.749 | 0.164 | 0.00E+00 | Podocyte-3 | Adam15   |
| 0.00E+00 | 1.17 | 0.795 | 0.143 | 0.00E+00 | Podocyte-3 | Klf7     |
| 0.00E+00 | 1.17 | 0.756 | 0.091 | 0.00E+00 | Podocyte-3 | Cavin1   |
| 0.00E+00 | 1.16 | 0.781 | 0.074 | 0.00E+00 | Podocyte-3 | Arhgap31 |
| 0.00E+00 | 1.16 | 0.743 | 0.059 | 0.00E+00 | Podocyte-3 | Mmrr2    |
| 0.00E+00 | 1.15 | 0.824 | 0.168 | 0.00E+00 | Podocyte-3 | Anxa2    |
| 0.00E+00 | 1.13 | 0.747 | 0.133 | 0.00E+00 | Podocyte-3 | Bst2     |
| 0.00E+00 | 1.13 | 0.659 | 0.093 | 0.00E+00 | Podocyte-3 | Tuba1a   |
| 0.00E+00 | 1.12 | 0.673 | 0.056 | 0.00E+00 | Podocyte-3 | Gm8995   |

|           |      |       |       |           |            |             |
|-----------|------|-------|-------|-----------|------------|-------------|
| 0.00E+00  | 1.11 | 0.774 | 0.08  | 0.00E+00  | Podocyte-3 | Cald1       |
| 0.00E+00  | 1.10 | 0.731 | 0.045 | 0.00E+00  | Podocyte-3 | Myct1       |
| 0.00E+00  | 1.10 | 0.666 | 0.036 | 0.00E+00  | Podocyte-3 | Palmd       |
| 0.00E+00  | 1.09 | 0.698 | 0.055 | 0.00E+00  | Podocyte-3 | Grasp       |
| 0.00E+00  | 1.09 | 0.625 | 0.025 | 0.00E+00  | Podocyte-3 | Gja4        |
| 0.00E+00  | 1.04 | 0.725 | 0.044 | 0.00E+00  | Podocyte-3 | Tie1        |
| 0.00E+00  | 1.04 | 0.713 | 0.052 | 0.00E+00  | Podocyte-3 | Clec1a      |
| 0.00E+00  | 1.03 | 0.639 | 0.014 | 0.00E+00  | Podocyte-3 | Ptprr       |
| 0.00E+00  | 1.03 | 0.718 | 0.043 | 0.00E+00  | Podocyte-3 | Sncg        |
| 0.00E+00  | 1.03 | 0.7   | 0.058 | 0.00E+00  | Podocyte-3 | Ehd2        |
| 0.00E+00  | 0.98 | 0.657 | 0.049 | 0.00E+00  | Podocyte-3 | Pmp22       |
| 0.00E+00  | 0.97 | 0.7   | 0.05  | 0.00E+00  | Podocyte-3 | Cd34        |
| 0.00E+00  | 0.97 | 0.698 | 0.065 | 0.00E+00  | Podocyte-3 | Cav1        |
| 0.00E+00  | 0.96 | 0.752 | 0.058 | 0.00E+00  | Podocyte-3 | AU021092    |
| 0.00E+00  | 0.96 | 0.664 | 0.088 | 0.00E+00  | Podocyte-3 | Notch1      |
| 0.00E+00  | 0.96 | 0.682 | 0.102 | 0.00E+00  | Podocyte-3 | Kitl        |
| 0.00E+00  | 0.95 | 0.711 | 0.106 | 0.00E+00  | Podocyte-3 | Psmb8       |
| 0.00E+00  | 0.95 | 0.693 | 0.046 | 0.00E+00  | Podocyte-3 | Rasip1      |
| 0.00E+00  | 0.95 | 0.682 | 0.065 | 0.00E+00  | Podocyte-3 | Cbfa2t3     |
| 0.00E+00  | 0.94 | 0.684 | 0.045 | 0.00E+00  | Podocyte-3 | Cldn15      |
| 0.00E+00  | 0.93 | 0.731 | 0.081 | 0.00E+00  | Podocyte-3 | Gimap1      |
| 0.00E+00  | 0.92 | 0.661 | 0.039 | 0.00E+00  | Podocyte-3 | Fgd5        |
| 0.00E+00  | 0.92 | 0.628 | 0.041 | 0.00E+00  | Podocyte-3 | Jcad        |
| 0.00E+00  | 0.92 | 0.842 | 0.096 | 0.00E+00  | Podocyte-3 | Emcn        |
| 0.00E+00  | 0.91 | 0.605 | 0.064 | 0.00E+00  | Podocyte-3 | Rasd1       |
| 0.00E+00  | 0.90 | 0.67  | 0.097 | 0.00E+00  | Podocyte-3 | Mpzl1       |
| 0.00E+00  | 0.90 | 0.621 | 0.035 | 0.00E+00  | Podocyte-3 | Samd12      |
| 0.00E+00  | 0.89 | 0.609 | 0.078 | 0.00E+00  | Podocyte-3 | Lmcd1       |
| 0.00E+00  | 0.89 | 0.603 | 0.039 | 0.00E+00  | Podocyte-3 | Sparcl1     |
| 0.00E+00  | 0.88 | 0.709 | 0.083 | 0.00E+00  | Podocyte-3 | Mef2c       |
| 0.00E+00  | 0.88 | 0.666 | 0.046 | 0.00E+00  | Podocyte-3 | Rapgef5     |
| 0.00E+00  | 0.88 | 0.896 | 0.103 | 0.00E+00  | Podocyte-3 | Plpp1       |
| 0.00E+00  | 0.87 | 0.659 | 0.068 | 0.00E+00  | Podocyte-3 | Ets1        |
| 0.00E+00  | 0.86 | 0.673 | 0.06  | 0.00E+00  | Podocyte-3 | Sifn5       |
| 0.00E+00  | 0.86 | 0.614 | 0.033 | 0.00E+00  | Podocyte-3 | Atp2a3      |
| 0.00E+00  | 0.85 | 0.657 | 0.048 | 0.00E+00  | Podocyte-3 | Lrrc8c      |
| 0.00E+00  | 0.84 | 0.637 | 0.059 | 0.00E+00  | Podocyte-3 | Cyyr1       |
| 0.00E+00  | 0.84 | 0.619 | 0.073 | 0.00E+00  | Podocyte-3 | Dnm3        |
| 0.00E+00  | 0.82 | 0.625 | 0.077 | 0.00E+00  | Podocyte-3 | Kank3       |
| 0.00E+00  | 0.82 | 0.65  | 0.045 | 0.00E+00  | Podocyte-3 | Tek         |
| 0.00E+00  | 0.81 | 0.619 | 0.054 | 0.00E+00  | Podocyte-3 | Amotl1      |
| 0.00E+00  | 0.80 | 0.734 | 0.119 | 0.00E+00  | Podocyte-3 | Gng11       |
| 0.00E+00  | 0.79 | 0.628 | 0.077 | 0.00E+00  | Podocyte-3 | Gngt2       |
| 0.00E+00  | 0.75 | 0.63  | 0.074 | 0.00E+00  | Podocyte-3 | Efnb2       |
| 6.07E-306 | 1.25 | 0.686 | 0.121 | 1.88E-301 | Podocyte-3 | Slco2a1     |
| 1.69E-299 | 1.24 | 0.621 | 0.098 | 5.25E-295 | Podocyte-3 | Gm26532     |
| 2.21E-291 | 0.75 | 0.65  | 0.11  | 6.85E-287 | Podocyte-3 | Kctd10      |
| 1.26E-289 | 0.78 | 0.643 | 0.108 | 3.89E-285 | Podocyte-3 | Sorbs2      |
| 5.39E-289 | 1.34 | 0.783 | 0.178 | 1.67E-284 | Podocyte-3 | Cavin2      |
| 1.62E-285 | 0.78 | 0.661 | 0.115 | 5.01E-281 | Podocyte-3 | Lamb2       |
| 5.31E-284 | 1.04 | 0.686 | 0.128 | 1.64E-279 | Podocyte-3 | Emp1        |
| 4.66E-278 | 1.14 | 0.745 | 0.17  | 1.44E-273 | Podocyte-3 | Tspan7      |
| 2.47E-275 | 0.72 | 0.616 | 0.095 | 7.64E-271 | Podocyte-3 | Tgfb1       |
| 1.72E-272 | 0.86 | 0.691 | 0.132 | 5.33E-268 | Podocyte-3 | Ddah2       |
| 1.74E-272 | 0.78 | 0.621 | 0.109 | 5.39E-268 | Podocyte-3 | Cyth3       |
| 6.60E-272 | 0.82 | 0.643 | 0.113 | 2.05E-267 | Podocyte-3 | H2-Q4       |
| 8.56E-272 | 0.93 | 0.691 | 0.138 | 2.65E-267 | Podocyte-3 | Utrn        |
| 1.52E-266 | 1.07 | 0.736 | 0.175 | 4.71E-262 | Podocyte-3 | 931406P16Ri |
| 2.16E-266 | 1.16 | 0.804 | 0.211 | 6.68E-262 | Podocyte-3 | Rras        |
| 6.65E-264 | 0.78 | 0.65  | 0.119 | 2.06E-259 | Podocyte-3 | Fas         |
| 1.58E-262 | 1.48 | 0.98  | 0.414 | 4.88E-258 | Podocyte-3 | Ifitm2      |
| 9.04E-261 | 1.62 | 0.984 | 0.463 | 2.80E-256 | Podocyte-3 | Ly6e        |
| 3.94E-260 | 0.78 | 0.657 | 0.123 | 1.22E-255 | Podocyte-3 | Pdgbf       |
| 1.13E-257 | 0.76 | 0.648 | 0.119 | 3.51E-253 | Podocyte-3 | Adgre5      |

|           |      |       |       |           |            |         |
|-----------|------|-------|-------|-----------|------------|---------|
| 2.19E-257 | 1.31 | 0.901 | 0.316 | 6.77E-253 | Podocyte-3 | Arpc1b  |
| 1.38E-252 | 1.35 | 0.84  | 0.285 | 4.28E-248 | Podocyte-3 | Foxp1   |
| 3.33E-251 | 1.31 | 0.842 | 0.265 | 1.03E-246 | Podocyte-3 | Ahnak   |
| 1.05E-244 | 1.04 | 0.603 | 0.118 | 3.27E-240 | Podocyte-3 | Plac8   |
| 4.19E-244 | 1.40 | 0.926 | 0.415 | 1.30E-239 | Podocyte-3 | S100a13 |
| 1.94E-237 | 2.12 | 0.991 | 0.835 | 6.02E-233 | Podocyte-3 | Cst3    |
| 1.82E-235 | 1.50 | 0.991 | 0.81  | 5.63E-231 | Podocyte-3 | Calm1   |
| 2.87E-233 | 0.95 | 0.781 | 0.2   | 8.90E-229 | Podocyte-3 | Bcam    |
| 5.45E-232 | 0.88 | 0.718 | 0.163 | 1.69E-227 | Podocyte-3 | Tnfaip2 |
| 3.11E-229 | 0.78 | 0.605 | 0.125 | 9.63E-225 | Podocyte-3 | Swap70  |
| 4.32E-229 | 1.35 | 0.932 | 0.408 | 1.34E-224 | Podocyte-3 | Rhob    |
| 1.86E-226 | 1.29 | 1     | 0.525 | 5.76E-222 | Podocyte-3 | Tmsb4x  |
| 6.07E-225 | 1.60 | 0.995 | 0.654 | 1.88E-220 | Podocyte-3 | Ly6a    |
| 4.79E-224 | 1.17 | 0.74  | 0.22  | 1.48E-219 | Podocyte-3 | Plec    |
| 9.57E-222 | 1.23 | 0.869 | 0.356 | 2.96E-217 | Podocyte-3 | S100a16 |
| 2.31E-221 | 0.77 | 0.634 | 0.13  | 7.14E-217 | Podocyte-3 | Syne1   |
| 1.97E-220 | 1.46 | 1     | 0.895 | 6.10E-216 | Podocyte-3 | Timp3   |
| 8.64E-220 | 1.60 | 0.989 | 0.622 | 2.68E-215 | Podocyte-3 | H2-D1   |
| 5.60E-216 | 0.88 | 0.652 | 0.161 | 1.74E-211 | Podocyte-3 | Plscr4  |
| 4.96E-214 | 1.29 | 0.989 | 0.735 | 1.54E-209 | Podocyte-3 | Laptm4a |
| 1.66E-210 | 1.14 | 0.822 | 0.301 | 5.14E-206 | Podocyte-3 | Tcf4    |
| 3.90E-209 | 0.61 | 0.648 | 0.135 | 1.21E-204 | Podocyte-3 | H2-Q7   |
| 2.06E-206 | 1.34 | 0.959 | 0.636 | 6.39E-202 | Podocyte-3 | Gnai2   |
| 2.47E-205 | 0.68 | 0.614 | 0.125 | 7.66E-201 | Podocyte-3 | Zfhx3   |
| 6.00E-202 | 1.23 | 0.966 | 0.725 | 1.86E-197 | Podocyte-3 | Tspo    |
| 2.05E-199 | 1.25 | 0.788 | 0.284 | 6.36E-195 | Podocyte-3 | Clic5   |
| 3.22E-199 | 1.02 | 1     | 0.97  | 9.96E-195 | Podocyte-3 | Ptma    |
| 4.34E-198 | 0.84 | 0.641 | 0.168 | 1.34E-193 | Podocyte-3 | Dab2ip  |
| 1.81E-196 | 1.08 | 0.826 | 0.296 | 5.62E-192 | Podocyte-3 | Tsc22d3 |
| 3.42E-194 | 0.64 | 0.682 | 0.157 | 1.06E-189 | Podocyte-3 | Csrp1   |
| 1.03E-192 | 1.08 | 0.905 | 0.425 | 3.18E-188 | Podocyte-3 | Anxa5   |
| 1.05E-191 | 1.39 | 0.883 | 0.44  | 3.25E-187 | Podocyte-3 | Slc38a2 |
| 3.30E-191 | 0.89 | 0.998 | 0.976 | 1.02E-186 | Podocyte-3 | Rps14   |
| 3.35E-191 | 1.32 | 0.982 | 0.693 | 1.04E-186 | Podocyte-3 | H2-K1   |
| 1.18E-188 | 1.39 | 0.937 | 0.519 | 3.65E-184 | Podocyte-3 | Nfkbia  |
| 2.46E-188 | 1.59 | 0.935 | 0.664 | 7.63E-184 | Podocyte-3 | Slc6a6  |
| 2.38E-187 | 0.84 | 0.637 | 0.162 | 7.38E-183 | Podocyte-3 | Pcdh17  |
| 3.20E-186 | 0.52 | 0.603 | 0.126 | 9.92E-182 | Podocyte-3 | H2-Q6   |
| 3.23E-186 | 0.82 | 0.702 | 0.205 | 1.00E-181 | Podocyte-3 | Tmod3   |
| 1.01E-183 | 1.04 | 0.63  | 0.172 | 3.14E-179 | Podocyte-3 | Rflnb   |
| 2.36E-182 | 0.92 | 0.731 | 0.236 | 7.30E-178 | Podocyte-3 | Slc50a1 |
| 5.21E-182 | 0.78 | 0.619 | 0.152 | 1.61E-177 | Podocyte-3 | Ddit4   |
| 3.26E-181 | 0.83 | 0.7   | 0.201 | 1.01E-176 | Podocyte-3 | Bnip2   |
| 5.18E-180 | 0.83 | 0.998 | 0.963 | 1.60E-175 | Podocyte-3 | Rpl9    |
| 3.08E-178 | 0.89 | 0.675 | 0.199 | 9.54E-174 | Podocyte-3 | Fam117b |
| 4.11E-178 | 1.04 | 0.898 | 0.38  | 1.27E-173 | Podocyte-3 | Cd9     |
| 7.66E-176 | 0.98 | 0.772 | 0.293 | 2.37E-171 | Podocyte-3 | Luzp1   |
| 7.93E-176 | 0.93 | 0.901 | 0.305 | 2.46E-171 | Podocyte-3 | Cd24a   |
| 1.42E-175 | 1.07 | 0.619 | 0.167 | 4.41E-171 | Podocyte-3 | Sbno2   |
| 6.74E-175 | 1.29 | 0.901 | 0.438 | 2.09E-170 | Podocyte-3 | Id1     |
| 8.11E-174 | 0.81 | 0.998 | 0.975 | 2.51E-169 | Podocyte-3 | Rps20   |
| 2.27E-172 | 0.81 | 1     | 0.979 | 7.04E-168 | Podocyte-3 | Rps24   |
| 3.19E-172 | 1.00 | 0.986 | 0.878 | 9.89E-168 | Podocyte-3 | Cd81    |
| 5.86E-172 | 0.71 | 1     | 0.996 | 1.82E-167 | Podocyte-3 | Tpt1    |
| 7.67E-171 | 1.14 | 0.962 | 0.666 | 2.38E-166 | Podocyte-3 | B2m     |
| 2.05E-170 | 0.84 | 1     | 0.976 | 6.36E-166 | Podocyte-3 | Rps27   |
| 7.53E-170 | 0.71 | 0.609 | 0.159 | 2.33E-165 | Podocyte-3 | Tjp1    |
| 2.87E-169 | 1.18 | 0.948 | 0.713 | 8.88E-165 | Podocyte-3 | Dynll1  |
| 4.54E-169 | 0.83 | 0.998 | 0.965 | 1.41E-164 | Podocyte-3 | Rpl18a  |
| 2.27E-168 | 0.78 | 0.995 | 0.974 | 7.02E-164 | Podocyte-3 | Rps11   |
| 5.08E-166 | 1.09 | 0.916 | 0.552 | 1.57E-161 | Podocyte-3 | Tagln2  |
| 8.85E-165 | 0.83 | 0.993 | 0.956 | 2.74E-160 | Podocyte-3 | Rpl13   |
| 1.10E-163 | 0.84 | 0.995 | 0.946 | 3.42E-159 | Podocyte-3 | Rpl21   |
| 1.48E-163 | 1.06 | 0.95  | 0.763 | 4.57E-159 | Podocyte-3 | Sptbn1  |

|           |      |       |       |           |            |          |
|-----------|------|-------|-------|-----------|------------|----------|
| 4.88E-163 | 1.15 | 0.767 | 0.295 | 1.51E-158 | Podocyte-3 | Ier5     |
| 2.31E-162 | 0.82 | 0.993 | 0.956 | 7.15E-158 | Podocyte-3 | Rps4x    |
| 1.35E-160 | 0.89 | 0.684 | 0.225 | 4.17E-156 | Podocyte-3 | Limch1   |
| 4.90E-160 | 0.79 | 0.991 | 0.954 | 1.52E-155 | Podocyte-3 | Rps23    |
| 1.16E-159 | 0.79 | 0.998 | 0.975 | 3.58E-155 | Podocyte-3 | Rps12    |
| 1.67E-159 | 0.73 | 1     | 0.985 | 5.18E-155 | Podocyte-3 | Eif1     |
| 5.51E-159 | 0.77 | 1     | 0.986 | 1.71E-154 | Podocyte-3 | Rps8     |
| 5.92E-159 | 1.76 | 0.758 | 0.311 | 1.83E-154 | Podocyte-3 | Hspa1a   |
| 7.96E-159 | 0.93 | 0.786 | 0.335 | 2.47E-154 | Podocyte-3 | Tubb5    |
| 1.13E-158 | 1.46 | 0.738 | 0.293 | 3.51E-154 | Podocyte-3 | Ppp1r15a |
| 1.22E-158 | 0.81 | 0.991 | 0.961 | 3.77E-154 | Podocyte-3 | Rpl8     |
| 7.46E-157 | 0.80 | 0.993 | 0.963 | 2.31E-152 | Podocyte-3 | Rps5     |
| 1.13E-156 | 1.10 | 0.898 | 0.528 | 3.49E-152 | Podocyte-3 | Btg1     |
| 1.19E-153 | 0.78 | 0.993 | 0.957 | 3.69E-149 | Podocyte-3 | Rps3     |
| 4.11E-153 | 1.06 | 0.657 | 0.221 | 1.27E-148 | Podocyte-3 | Ier5l    |
| 2.17E-152 | 1.06 | 0.856 | 0.496 | 6.73E-148 | Podocyte-3 | Clic4    |
| 3.05E-152 | 0.73 | 0.998 | 0.972 | 9.43E-148 | Podocyte-3 | Rps3a1   |
| 2.06E-151 | 0.71 | 0.998 | 0.972 | 6.37E-147 | Podocyte-3 | Rps16    |
| 6.26E-151 | 1.05 | 0.824 | 0.442 | 1.94E-146 | Podocyte-3 | Tpm3     |
| 6.27E-151 | 1.04 | 0.777 | 0.336 | 1.94E-146 | Podocyte-3 | Aoep     |
| 3.54E-150 | 1.04 | 0.659 | 0.201 | 1.10E-145 | Podocyte-3 | Socs3    |
| 2.02E-149 | 0.94 | 0.761 | 0.32  | 6.27E-145 | Podocyte-3 | Klf13    |
| 7.30E-149 | 0.87 | 0.777 | 0.344 | 2.26E-144 | Podocyte-3 | Wasf2    |
| 8.08E-149 | 0.84 | 0.984 | 0.915 | 2.50E-144 | Podocyte-3 | Rpl3     |
| 2.59E-148 | 0.85 | 0.718 | 0.277 | 8.04E-144 | Podocyte-3 | Septin11 |
| 1.33E-147 | 1.02 | 0.765 | 0.353 | 4.12E-143 | Podocyte-3 | Akap13   |
| 3.51E-146 | 1.69 | 0.81  | 0.412 | 1.09E-141 | Podocyte-3 | Ier3     |
| 8.53E-146 | 0.76 | 0.993 | 0.943 | 2.64E-141 | Podocyte-3 | Rpl34    |
| 8.73E-146 | 0.67 | 0.993 | 0.973 | 2.71E-141 | Podocyte-3 | Rpl19    |
| 1.15E-145 | 0.97 | 0.783 | 0.355 | 3.56E-141 | Podocyte-3 | Msn      |
| 1.83E-145 | 0.94 | 0.824 | 0.422 | 5.66E-141 | Podocyte-3 | Mxd4     |
| 2.16E-145 | 0.88 | 0.691 | 0.257 | 6.70E-141 | Podocyte-3 | Plscr1   |
| 4.24E-144 | 0.88 | 0.763 | 0.343 | 1.31E-139 | Podocyte-3 | Mapk3    |
| 7.21E-142 | 0.72 | 0.609 | 0.187 | 2.23E-137 | Podocyte-3 | Rtl8a    |
| 7.03E-141 | 1.13 | 0.801 | 0.438 | 2.18E-136 | Podocyte-3 | Pbx1     |
| 2.17E-140 | 1.13 | 0.673 | 0.258 | 6.73E-136 | Podocyte-3 | Sertad1  |
| 2.60E-140 | 1.43 | 0.81  | 0.43  | 8.04E-136 | Podocyte-3 | Ier2     |
| 2.63E-140 | 0.67 | 0.605 | 0.183 | 8.13E-136 | Podocyte-3 | Npdc1    |
| 4.23E-138 | 0.70 | 0.657 | 0.219 | 1.31E-133 | Podocyte-3 | Trim47   |
| 2.38E-137 | 0.72 | 0.993 | 0.901 | 7.37E-133 | Podocyte-3 | Rpl18    |
| 4.59E-137 | 0.56 | 0.711 | 0.233 | 1.42E-132 | Podocyte-3 | Tmsb10   |
| 2.24E-135 | 0.86 | 0.718 | 0.314 | 6.94E-131 | Podocyte-3 | Arl2bp   |
| 2.64E-135 | 0.94 | 0.734 | 0.341 | 8.19E-131 | Podocyte-3 | Tnrc6c   |
| 3.45E-135 | 0.70 | 1     | 0.985 | 1.07E-130 | Podocyte-3 | Rps21    |
| 3.26E-134 | 0.90 | 0.725 | 0.325 | 1.01E-129 | Podocyte-3 | Klf3     |
| 4.53E-134 | 0.57 | 1     | 0.985 | 1.40E-129 | Podocyte-3 | Fau      |
| 4.76E-134 | 0.66 | 0.632 | 0.206 | 1.48E-129 | Podocyte-3 | Ii10rb   |
| 4.76E-133 | 0.71 | 0.991 | 0.928 | 1.48E-128 | Podocyte-3 | Rps19    |
| 3.34E-132 | 0.83 | 0.747 | 0.35  | 1.04E-127 | Podocyte-3 | Card19   |
| 3.92E-132 | 0.72 | 0.98  | 0.9   | 1.21E-127 | Podocyte-3 | Rpl7     |
| 1.15E-131 | 0.88 | 0.67  | 0.231 | 3.56E-127 | Podocyte-3 | Cebpd    |
| 2.11E-130 | 0.87 | 0.98  | 0.932 | 6.55E-126 | Podocyte-3 | H3f3b    |
| 2.82E-130 | 1.61 | 0.86  | 0.549 | 8.72E-126 | Podocyte-3 | Junb     |
| 1.29E-129 | 0.83 | 0.894 | 0.588 | 3.99E-125 | Podocyte-3 | Clic1    |
| 6.68E-129 | 0.76 | 0.704 | 0.29  | 2.07E-124 | Podocyte-3 | Ece1     |
| 2.73E-127 | 0.72 | 0.98  | 0.907 | 8.45E-123 | Podocyte-3 | Rps7     |
| 5.24E-126 | 0.58 | 0.655 | 0.22  | 1.62E-121 | Podocyte-3 | Vamp5    |
| 5.86E-126 | 0.93 | 0.826 | 0.539 | 1.81E-121 | Podocyte-3 | Gnb1     |
| 1.59E-125 | 0.59 | 1     | 0.988 | 4.94E-121 | Podocyte-3 | Rplp1    |
| 5.95E-125 | 0.64 | 0.632 | 0.183 | 1.84E-120 | Podocyte-3 | Mecom    |
| 1.26E-123 | 0.61 | 0.7   | 0.252 | 3.89E-119 | Podocyte-3 | Cd59a    |
| 1.39E-123 | 0.72 | 0.702 | 0.282 | 4.30E-119 | Podocyte-3 | Arl6ip5  |
| 1.43E-123 | 0.68 | 0.998 | 0.98  | 4.42E-119 | Podocyte-3 | Hsp90ab1 |
| 1.53E-123 | 0.90 | 0.679 | 0.235 | 4.75E-119 | Podocyte-3 | Gadd45b  |

|           |      |       |       |           |            |          |
|-----------|------|-------|-------|-----------|------------|----------|
| 4.53E-123 | 0.56 | 1     | 0.997 | 1.40E-118 | Podocyte-3 | Eef1a1   |
| 8.57E-123 | 0.74 | 0.948 | 0.818 | 2.66E-118 | Podocyte-3 | Rhoa     |
| 2.56E-122 | 0.83 | 0.847 | 0.532 | 7.93E-118 | Podocyte-3 | Cd47     |
| 5.80E-122 | 1.07 | 0.939 | 0.852 | 1.80E-117 | Podocyte-3 | Jund     |
| 5.85E-122 | 0.65 | 0.986 | 0.946 | 1.81E-117 | Podocyte-3 | Rpl17    |
| 6.20E-121 | 0.61 | 0.612 | 0.198 | 1.92E-116 | Podocyte-3 | Pls3     |
| 2.68E-120 | 0.81 | 0.725 | 0.327 | 8.30E-116 | Podocyte-3 | Lims2    |
| 3.13E-120 | 0.76 | 0.939 | 0.798 | 9.68E-116 | Podocyte-3 | Cfl1     |
| 7.19E-118 | 0.95 | 0.912 | 0.613 | 2.23E-113 | Podocyte-3 | Id3      |
| 2.09E-117 | 0.84 | 0.901 | 0.72  | 6.48E-113 | Podocyte-3 | Aplp2    |
| 2.75E-117 | 0.80 | 0.844 | 0.453 | 8.53E-113 | Podocyte-3 | Selenow  |
| 2.79E-117 | 0.91 | 0.93  | 0.758 | 8.66E-113 | Podocyte-3 | S100a10  |
| 1.14E-116 | 0.65 | 0.993 | 0.939 | 3.53E-112 | Podocyte-3 | Rpl30    |
| 4.87E-116 | 0.85 | 0.885 | 0.713 | 1.51E-111 | Podocyte-3 | Rdx      |
| 1.39E-115 | 0.71 | 0.707 | 0.303 | 4.31E-111 | Podocyte-3 | Smco4    |
| 1.73E-115 | 0.67 | 0.695 | 0.274 | 5.36E-111 | Podocyte-3 | Tpm4     |
| 4.14E-115 | 0.93 | 0.901 | 0.613 | 1.28E-110 | Podocyte-3 | Dusp1    |
| 4.31E-115 | 0.54 | 0.995 | 0.976 | 1.34E-110 | Podocyte-3 | Rpl26    |
| 2.05E-114 | 0.59 | 0.88  | 0.419 | 6.36E-110 | Podocyte-3 | Sh3bgrl3 |
| 3.58E-114 | 0.62 | 0.98  | 0.961 | 1.11E-109 | Podocyte-3 | Rps15    |
| 7.97E-114 | 0.81 | 0.91  | 0.715 | 2.47E-109 | Podocyte-3 | Calm2    |
| 2.17E-113 | 1.25 | 0.754 | 0.376 | 6.74E-109 | Podocyte-3 | Fosb     |
| 5.00E-113 | 0.73 | 0.67  | 0.284 | 1.55E-108 | Podocyte-3 | Hyal2    |
| 1.67E-112 | 0.56 | 0.984 | 0.95  | 5.18E-108 | Podocyte-3 | Rpsa     |
| 2.09E-112 | 0.64 | 0.616 | 0.229 | 6.46E-108 | Podocyte-3 | Phc2     |
| 7.28E-112 | 0.63 | 0.962 | 0.896 | 2.25E-107 | Podocyte-3 | Rpl12    |
| 1.04E-111 | 0.56 | 0.989 | 0.967 | 3.22E-107 | Podocyte-3 | Rps9     |
| 1.49E-111 | 0.73 | 0.661 | 0.286 | 4.60E-107 | Podocyte-3 | Gltf     |
| 7.37E-110 | 0.82 | 0.736 | 0.391 | 2.28E-105 | Podocyte-3 | Arid5b   |
| 1.40E-109 | 0.74 | 0.652 | 0.277 | 4.33E-105 | Podocyte-3 | Btbd7    |
| 3.13E-109 | 0.65 | 0.67  | 0.263 | 9.68E-105 | Podocyte-3 | Serpib6a |
| 3.33E-109 | 0.72 | 0.907 | 0.688 | 1.03E-104 | Podocyte-3 | Serinc3  |
| 4.45E-109 | 0.72 | 0.763 | 0.396 | 1.38E-104 | Podocyte-3 | Septin7  |
| 1.14E-108 | 0.65 | 0.982 | 0.919 | 3.54E-104 | Podocyte-3 | H3f3a    |
| 8.16E-108 | 0.62 | 0.966 | 0.932 | 2.53E-103 | Podocyte-3 | Gnas     |
| 9.09E-108 | 1.09 | 0.837 | 0.642 | 2.82E-103 | Podocyte-3 | Glul     |
| 1.51E-107 | 0.78 | 0.81  | 0.319 | 4.68E-103 | Podocyte-3 | Mal      |
| 2.74E-107 | 1.11 | 0.937 | 0.771 | 8.49E-103 | Podocyte-3 | Jun      |
| 9.24E-107 | 0.70 | 0.763 | 0.364 | 2.86E-102 | Podocyte-3 | Iqgap1   |
| 1.69E-106 | 0.57 | 0.993 | 0.971 | 5.24E-102 | Podocyte-3 | Rpl35a   |
| 2.93E-106 | 1.46 | 0.84  | 0.584 | 9.09E-102 | Podocyte-3 | Fos      |
| 3.06E-105 | 0.54 | 0.995 | 0.975 | 9.47E-101 | Podocyte-3 | Rps27a   |
| 1.30E-103 | 0.69 | 0.856 | 0.595 | 4.02E-99  | Podocyte-3 | Fkbp1a   |
| 2.81E-102 | 0.90 | 0.853 | 0.635 | 8.72E-98  | Podocyte-3 | Mcl1     |
| 4.37E-102 | 0.85 | 0.946 | 0.698 | 1.35E-97  | Podocyte-3 | Txnip    |
| 5.41E-101 | 0.76 | 0.806 | 0.519 | 1.68E-96  | Podocyte-3 | Cyb5r3   |
| 1.94E-100 | 0.74 | 0.971 | 0.905 | 6.01E-96  | Podocyte-3 | Ddx5     |
| 6.04E-100 | 0.57 | 0.973 | 0.92  | 1.87E-95  | Podocyte-3 | Rpl29    |
| 6.09E-100 | 0.68 | 0.704 | 0.341 | 1.89E-95  | Podocyte-3 | Dusp3    |
| 1.09E-99  | 0.71 | 0.779 | 0.437 | 3.39E-95  | Podocyte-3 | Tmem50a  |
| 1.83E-99  | 0.61 | 0.63  | 0.248 | 5.68E-95  | Podocyte-3 | Leprot   |
| 2.63E-99  | 0.57 | 0.984 | 0.946 | 8.14E-95  | Podocyte-3 | Rpl14    |
| 5.70E-99  | 0.53 | 0.991 | 0.961 | 1.77E-94  | Podocyte-3 | Rplp2    |
| 5.96E-99  | 0.71 | 0.883 | 0.648 | 1.85E-94  | Podocyte-3 | Myl12a   |
| 2.74E-98  | 0.70 | 0.817 | 0.531 | 8.49E-94  | Podocyte-3 | Irgb1    |
| 3.99E-98  | 0.51 | 0.984 | 0.946 | 1.24E-93  | Podocyte-3 | Rps13    |
| 2.42E-97  | 0.59 | 0.971 | 0.934 | 7.49E-93  | Podocyte-3 | Rack1    |
| 2.81E-97  | 0.72 | 0.738 | 0.407 | 8.72E-93  | Podocyte-3 | Ywhah    |
| 4.36E-97  | 0.56 | 0.998 | 0.964 | 1.35E-92  | Podocyte-3 | Actb     |
| 1.70E-96  | 0.71 | 0.837 | 0.659 | 5.26E-92  | Podocyte-3 | Rac1     |
| 2.31E-96  | 0.59 | 0.679 | 0.302 | 7.16E-92  | Podocyte-3 | Ccdc85b  |
| 3.02E-96  | 1.02 | 0.637 | 0.285 | 9.36E-92  | Podocyte-3 | Hspa1b   |
| 5.35E-96  | 0.51 | 0.984 | 0.966 | 1.66E-91  | Podocyte-3 | Rps18    |
| 3.99E-94  | 0.64 | 0.623 | 0.273 | 1.24E-89  | Podocyte-3 | Nfix     |



|          |      |       |       |          |            |          |
|----------|------|-------|-------|----------|------------|----------|
| 6.01E-94 | 0.73 | 0.731 | 0.412 | 1.86E-89 | Podocyte-3 | Mprip    |
| 9.15E-94 | 0.66 | 0.878 | 0.774 | 2.83E-89 | Podocyte-3 | Rps6     |
| 2.20E-93 | 0.98 | 0.786 | 0.55  | 6.80E-89 | Podocyte-3 | Srsf7    |
| 5.27E-93 | 0.60 | 0.941 | 0.857 | 1.63E-88 | Podocyte-3 | Rpl27a   |
| 1.54E-92 | 0.98 | 0.756 | 0.492 | 4.78E-88 | Podocyte-3 | Lmna     |
| 1.12E-91 | 0.75 | 0.849 | 0.547 | 3.47E-87 | Podocyte-3 | Sgk1     |
| 1.85E-91 | 0.51 | 0.995 | 0.984 | 5.74E-87 | Podocyte-3 | Rpl37a   |
| 5.01E-91 | 0.63 | 0.652 | 0.298 | 1.55E-86 | Podocyte-3 | Itm2c    |
| 8.24E-91 | 0.57 | 0.953 | 0.867 | 2.55E-86 | Podocyte-3 | Rpl5     |
| 1.71E-90 | 0.62 | 0.896 | 0.75  | 5.31E-86 | Podocyte-3 | Gnb2     |
| 1.85E-89 | 0.53 | 0.993 | 0.981 | 5.73E-85 | Podocyte-3 | Rpl37    |
| 2.78E-89 | 0.63 | 0.639 | 0.268 | 8.62E-85 | Podocyte-3 | Clec2d   |
| 3.28E-89 | 0.62 | 0.894 | 0.745 | 1.02E-84 | Podocyte-3 | Eif3f    |
| 3.05E-88 | 0.67 | 0.826 | 0.648 | 9.45E-84 | Podocyte-3 | Sh3glb1  |
| 1.33E-87 | 0.61 | 0.605 | 0.265 | 4.11E-83 | Podocyte-3 | Mast4    |
| 8.39E-87 | 0.65 | 0.657 | 0.312 | 2.60E-82 | Podocyte-3 | Serpinh1 |
| 1.65E-86 | 0.68 | 0.754 | 0.464 | 5.11E-82 | Podocyte-3 | F11r     |
| 4.84E-85 | 0.65 | 0.815 | 0.513 | 1.50E-80 | Podocyte-3 | S100a11  |
| 1.83E-84 | 1.22 | 0.763 | 0.484 | 5.68E-80 | Podocyte-3 | Egr1     |
| 5.95E-84 | 0.56 | 0.876 | 0.747 | 1.84E-79 | Podocyte-3 | Selenok  |
| 7.31E-84 | 0.76 | 0.673 | 0.384 | 2.26E-79 | Podocyte-3 | Tulp4    |
| 2.10E-83 | 0.57 | 0.892 | 0.757 | 6.49E-79 | Podocyte-3 | Arpc2    |
| 2.58E-83 | 0.71 | 0.632 | 0.316 | 7.98E-79 | Podocyte-3 | Dennd5b  |
| 9.15E-83 | 0.62 | 0.652 | 0.32  | 2.83E-78 | Podocyte-3 | Mef2a    |
| 9.14E-82 | 0.73 | 0.646 | 0.352 | 2.83E-77 | Podocyte-3 | Tut7     |
| 1.34E-81 | 0.56 | 0.619 | 0.284 | 4.16E-77 | Podocyte-3 | Cr1l     |
| 1.73E-81 | 0.61 | 0.702 | 0.38  | 5.36E-77 | Podocyte-3 | Cd151    |
| 2.95E-81 | 0.68 | 0.788 | 0.58  | 9.13E-77 | Podocyte-3 | Cltb     |
| 2.70E-80 | 0.62 | 0.628 | 0.301 | 8.36E-76 | Podocyte-3 | Tuba1b   |
| 7.69E-80 | 0.61 | 0.74  | 0.434 | 2.38E-75 | Podocyte-3 | Shisa5   |
| 3.59E-79 | 0.61 | 0.743 | 0.462 | 1.11E-74 | Podocyte-3 | Ppp1r2   |
| 4.65E-79 | 0.66 | 0.668 | 0.349 | 1.44E-74 | Podocyte-3 | Nfat5    |
| 9.44E-79 | 0.71 | 0.851 | 0.75  | 2.92E-74 | Podocyte-3 | Dnaja1   |
| 1.57E-78 | 0.55 | 0.661 | 0.332 | 4.85E-74 | Podocyte-3 | Col4a1   |
| 4.38E-78 | 0.65 | 0.833 | 0.48  | 1.36E-73 | Podocyte-3 | Btg2     |
| 1.77E-76 | 0.98 | 0.664 | 0.325 | 5.50E-72 | Podocyte-3 | Atf3     |
| 2.99E-76 | 0.52 | 0.914 | 0.821 | 9.26E-72 | Podocyte-3 | Cox7a2l  |
| 4.91E-76 | 0.61 | 0.616 | 0.314 | 1.52E-71 | Podocyte-3 | Gnaq     |
| 5.13E-76 | 0.54 | 0.91  | 0.803 | 1.59E-71 | Podocyte-3 | Rbm39    |
| 2.64E-75 | 0.58 | 0.639 | 0.28  | 8.17E-71 | Podocyte-3 | Tacc1    |
| 5.33E-75 | 0.64 | 0.711 | 0.457 | 1.65E-70 | Podocyte-3 | Gna11    |
| 2.72E-74 | 0.62 | 0.738 | 0.472 | 8.43E-70 | Podocyte-3 | Mapre1   |
| 8.93E-74 | 0.61 | 0.664 | 0.332 | 2.77E-69 | Podocyte-3 | H2-T23   |
| 9.55E-74 | 0.57 | 0.639 | 0.327 | 2.96E-69 | Podocyte-3 | Nedd9    |
| 2.36E-73 | 0.60 | 0.673 | 0.388 | 7.32E-69 | Podocyte-3 | Nr3c1    |
| 3.81E-73 | 0.59 | 0.725 | 0.457 | 1.18E-68 | Podocyte-3 | Ralbp1   |
| 9.72E-73 | 0.67 | 0.767 | 0.548 | 3.01E-68 | Podocyte-3 | Rap1b    |
| 1.24E-72 | 0.58 | 0.639 | 0.326 | 3.84E-68 | Podocyte-3 | Bmpr2    |
| 2.71E-72 | 0.59 | 0.765 | 0.522 | 8.39E-68 | Podocyte-3 | Tprgl    |
| 1.32E-71 | 0.61 | 0.772 | 0.57  | 4.09E-67 | Podocyte-3 | Rab11a   |
| 5.48E-71 | 0.68 | 0.684 | 0.416 | 1.70E-66 | Podocyte-3 | Lima1    |
| 1.04E-70 | 0.54 | 0.883 | 0.768 | 3.21E-66 | Podocyte-3 | Rps10    |
| 2.53E-69 | 0.57 | 0.661 | 0.34  | 7.84E-65 | Podocyte-3 | Ifi27    |
| 3.54E-69 | 0.59 | 0.815 | 0.623 | 1.10E-64 | Podocyte-3 | Srsf3    |
| 5.88E-68 | 0.51 | 0.912 | 0.873 | 1.82E-63 | Podocyte-3 | Rpl4     |
| 6.10E-68 | 0.56 | 0.835 | 0.677 | 1.89E-63 | Podocyte-3 | Kif5b    |
| 4.72E-67 | 0.60 | 0.684 | 0.427 | 1.46E-62 | Podocyte-3 | Ybx3     |
| 5.48E-67 | 0.54 | 0.609 | 0.319 | 1.70E-62 | Podocyte-3 | Cast     |
| 6.43E-67 | 0.55 | 0.609 | 0.323 | 1.99E-62 | Podocyte-3 | Sertad2  |
| 7.51E-67 | 0.57 | 0.74  | 0.501 | 2.33E-62 | Podocyte-3 | Syf2     |
| 6.27E-66 | 0.64 | 0.792 | 0.556 | 1.94E-61 | Podocyte-3 | Gadd45g  |
| 5.43E-65 | 0.55 | 0.72  | 0.469 | 1.68E-60 | Podocyte-3 | Bcl2l1   |
| 1.13E-63 | 0.58 | 0.634 | 0.359 | 3.49E-59 | Podocyte-3 | Kras     |
| 3.20E-63 | 0.52 | 0.903 | 0.768 | 9.92E-59 | Podocyte-3 | Tsc22d1  |

|          |      |       |       |          |            |          |
|----------|------|-------|-------|----------|------------|----------|
| 4.19E-63 | 0.66 | 0.63  | 0.35  | 1.30E-58 | Podocyte-3 | Tubb2a   |
| 4.44E-63 | 0.57 | 0.619 | 0.326 | 1.38E-58 | Podocyte-3 | Kdm6b    |
| 3.48E-62 | 0.56 | 0.634 | 0.339 | 1.08E-57 | Podocyte-3 | Tapbp    |
| 1.27E-61 | 0.54 | 0.605 | 0.327 | 3.94E-57 | Podocyte-3 | Arl4a    |
| 1.61E-61 | 0.50 | 0.619 | 0.333 | 4.98E-57 | Podocyte-3 | Rock2    |
| 4.06E-61 | 0.63 | 0.679 | 0.436 | 1.26E-56 | Podocyte-3 | Macf1    |
| 4.93E-61 | 0.55 | 0.718 | 0.438 | 1.53E-56 | Podocyte-3 | Myl12b   |
| 7.48E-61 | 0.73 | 0.616 | 0.348 | 2.32E-56 | Podocyte-3 | Ppp1r10  |
| 1.45E-60 | 0.57 | 0.725 | 0.521 | 4.49E-56 | Podocyte-3 | Sptan1   |
| 4.09E-60 | 0.56 | 0.758 | 0.555 | 1.27E-55 | Podocyte-3 | Kmt2e    |
| 1.22E-59 | 0.51 | 0.822 | 0.702 | 3.78E-55 | Podocyte-3 | Ctnnb1   |
| 1.70E-59 | 0.63 | 0.878 | 0.802 | 5.27E-55 | Podocyte-3 | Rsrp1    |
| 3.56E-59 | 0.56 | 0.752 | 0.542 | 1.10E-54 | Podocyte-3 | Rtn4     |
| 4.05E-59 | 0.50 | 0.767 | 0.514 | 1.25E-54 | Podocyte-3 | Selenom  |
| 4.25E-59 | 0.53 | 0.639 | 0.381 | 1.32E-54 | Podocyte-3 | Zbtb7a   |
| 3.27E-58 | 0.59 | 0.698 | 0.452 | 1.01E-53 | Podocyte-3 | Tra2a    |
| 5.84E-58 | 0.51 | 0.72  | 0.445 | 1.81E-53 | Podocyte-3 | Psme1    |
| 4.82E-57 | 0.72 | 0.684 | 0.492 | 1.49E-52 | Podocyte-3 | Ccn1     |
| 3.16E-56 | 0.57 | 0.632 | 0.37  | 9.78E-52 | Podocyte-3 | Ankrd12  |
| 4.10E-55 | 0.52 | 0.804 | 0.638 | 1.27E-50 | Podocyte-3 | Arhgdia  |
| 1.53E-54 | 0.61 | 0.749 | 0.588 | 4.75E-50 | Podocyte-3 | Clk1     |
| 2.41E-54 | 0.58 | 0.781 | 0.663 | 7.46E-50 | Podocyte-3 | Fus      |
| 5.51E-54 | 0.61 | 0.874 | 0.823 | 1.71E-49 | Podocyte-3 | Plscr2   |
| 7.54E-53 | 0.51 | 0.686 | 0.47  | 2.34E-48 | Podocyte-3 | Mbnl1    |
| 1.19E-52 | 0.64 | 0.752 | 0.616 | 3.69E-48 | Podocyte-3 | Brd2     |
| 1.75E-51 | 0.68 | 0.673 | 0.468 | 5.42E-47 | Podocyte-3 | Dnajb9   |
| 6.42E-51 | 0.57 | 0.684 | 0.479 | 1.99E-46 | Podocyte-3 | Sfr1     |
| 3.19E-50 | 0.56 | 0.727 | 0.578 | 9.87E-46 | Podocyte-3 | Purb     |
| 9.21E-49 | 0.65 | 0.725 | 0.591 | 2.85E-44 | Podocyte-3 | Atf4     |
| 2.00E-47 | 0.55 | 0.664 | 0.468 | 6.19E-43 | Podocyte-3 | Rfk      |
| 1.72E-46 | 0.54 | 0.664 | 0.488 | 5.32E-42 | Podocyte-3 | Nek7     |
| 3.93E-45 | 0.56 | 0.781 | 0.703 | 1.22E-40 | Podocyte-3 | Srsf2    |
| 8.98E-44 | 0.51 | 0.679 | 0.503 | 2.78E-39 | Podocyte-3 | Nop53    |
| 1.06E-42 | 0.51 | 0.643 | 0.424 | 3.29E-38 | Podocyte-3 | Resf1    |
| 4.45E-41 | 0.55 | 0.738 | 0.589 | 1.38E-36 | Podocyte-3 | Zfp36    |
| 1.23E-40 | 0.57 | 0.736 | 0.621 | 3.82E-36 | Podocyte-3 | Tubb4b   |
| 2.32E-39 | 0.64 | 0.856 | 0.879 | 7.19E-35 | Podocyte-3 | Hsp90aa1 |
| 0.00E+00 | 4.33 | 0.969 | 0.028 | 0.00E+00 | Podocyte-4 | Acta2    |
| 0.00E+00 | 3.92 | 0.986 | 0.017 | 0.00E+00 | Podocyte-4 | Rgs5     |
| 0.00E+00 | 3.91 | 0.969 | 0.018 | 0.00E+00 | Podocyte-4 | Tagln    |
| 0.00E+00 | 3.76 | 0.969 | 0.02  | 0.00E+00 | Podocyte-4 | Myl9     |
| 0.00E+00 | 3.34 | 0.917 | 0.024 | 0.00E+00 | Podocyte-4 | Tpm2     |
| 0.00E+00 | 3.05 | 0.969 | 0.006 | 0.00E+00 | Podocyte-4 | Myh11    |
| 0.00E+00 | 2.96 | 0.955 | 0.181 | 0.00E+00 | Podocyte-4 | Crip1    |
| 0.00E+00 | 2.95 | 0.955 | 0.039 | 0.00E+00 | Podocyte-4 | Sparcl1  |
| 0.00E+00 | 2.74 | 0.941 | 0.012 | 0.00E+00 | Podocyte-4 | Mustn1   |
| 0.00E+00 | 2.54 | 0.955 | 0.082 | 0.00E+00 | Podocyte-4 | Cald1    |
| 0.00E+00 | 2.22 | 0.824 | 0.018 | 0.00E+00 | Podocyte-4 | Gm13889  |
| 0.00E+00 | 2.12 | 0.866 | 0.104 | 0.00E+00 | Podocyte-4 | Vim      |
| 0.00E+00 | 2.08 | 0.921 | 0.09  | 0.00E+00 | Podocyte-4 | Flna     |
| 0.00E+00 | 1.95 | 0.893 | 0.031 | 0.00E+00 | Podocyte-4 | Pcp4l1   |
| 0.00E+00 | 1.89 | 0.797 | 0.002 | 0.00E+00 | Podocyte-4 | Rergl    |
| 0.00E+00 | 1.87 | 0.876 | 0.017 | 0.00E+00 | Podocyte-4 | Fxyd1    |
| 0.00E+00 | 1.87 | 0.903 | 0.085 | 0.00E+00 | Podocyte-4 | Mef2c    |
| 0.00E+00 | 1.86 | 0.931 | 0.149 | 0.00E+00 | Podocyte-4 | Tm4sf1   |
| 0.00E+00 | 1.83 | 0.641 | 0.027 | 0.00E+00 | Podocyte-4 | Mgp      |
| 0.00E+00 | 1.82 | 0.917 | 0.054 | 0.00E+00 | Podocyte-4 | Ebf1     |
| 0.00E+00 | 1.77 | 0.862 | 0.007 | 0.00E+00 | Podocyte-4 | Notch3   |
| 0.00E+00 | 1.76 | 0.89  | 0.125 | 0.00E+00 | Podocyte-4 | Zfhx3    |
| 0.00E+00 | 1.73 | 0.717 | 0.007 | 0.00E+00 | Podocyte-4 | Ndufa4l2 |
| 0.00E+00 | 1.72 | 0.703 | 0.005 | 0.00E+00 | Podocyte-4 | Pln      |
| 0.00E+00 | 1.68 | 0.828 | 0.109 | 0.00E+00 | Podocyte-4 | Sorbs2   |
| 0.00E+00 | 1.66 | 0.845 | 0.045 | 0.00E+00 | Podocyte-4 | Filip1l  |
| 0.00E+00 | 1.60 | 0.807 | 0.094 | 0.00E+00 | Podocyte-4 | Rasl11a  |

|           |      |       |       |           |            |             |
|-----------|------|-------|-------|-----------|------------|-------------|
| 0.00E+00  | 1.58 | 0.817 | 0.024 | 0.00E+00  | Podocyte-4 | Hopx        |
| 0.00E+00  | 1.57 | 0.834 | 0.094 | 0.00E+00  | Podocyte-4 | Cavin1      |
| 0.00E+00  | 1.55 | 0.748 | 0.046 | 0.00E+00  | Podocyte-4 | Sncg        |
| 0.00E+00  | 1.55 | 0.707 | 0.005 | 0.00E+00  | Podocyte-4 | Ppp1r14a    |
| 0.00E+00  | 1.53 | 0.803 | 0.002 | 0.00E+00  | Podocyte-4 | Lmod1       |
| 0.00E+00  | 1.52 | 0.81  | 0.086 | 0.00E+00  | Podocyte-4 | Ptp4a3      |
| 0.00E+00  | 1.51 | 0.8   | 0.07  | 0.00E+00  | Podocyte-4 | Cavin3      |
| 0.00E+00  | 1.37 | 0.779 | 0.067 | 0.00E+00  | Podocyte-4 | Lbh         |
| 0.00E+00  | 1.37 | 0.783 | 0.115 | 0.00E+00  | Podocyte-4 | Actn1       |
| 0.00E+00  | 1.36 | 0.762 | 0.017 | 0.00E+00  | Podocyte-4 | Pde3a       |
| 0.00E+00  | 1.34 | 0.697 | 0.031 | 0.00E+00  | Podocyte-4 | Bgn         |
| 0.00E+00  | 1.32 | 0.848 | 0.116 | 0.00E+00  | Podocyte-4 | Lamb2       |
| 0.00E+00  | 1.29 | 0.766 | 0.022 | 0.00E+00  | Podocyte-4 | Atp1b2      |
| 0.00E+00  | 1.28 | 0.672 | 0.015 | 0.00E+00  | Podocyte-4 | Myom1       |
| 0.00E+00  | 1.27 | 0.748 | 0.024 | 0.00E+00  | Podocyte-4 | Cenpa       |
| 0.00E+00  | 1.27 | 0.721 | 0.012 | 0.00E+00  | Podocyte-4 | Nrip2       |
| 0.00E+00  | 1.26 | 0.721 | 0.011 | 0.00E+00  | Podocyte-4 | Pdim3       |
| 0.00E+00  | 1.25 | 0.738 | 0.055 | 0.00E+00  | Podocyte-4 | Ppp1r12b    |
| 0.00E+00  | 1.24 | 0.714 | 0.002 | 0.00E+00  | Podocyte-4 | Rgs7bp      |
| 0.00E+00  | 1.24 | 0.745 | 0.039 | 0.00E+00  | Podocyte-4 | Mcam        |
| 0.00E+00  | 1.22 | 0.659 | 0.003 | 0.00E+00  | Podocyte-4 | Cox4i2      |
| 0.00E+00  | 1.21 | 0.631 | 0.006 | 0.00E+00  | Podocyte-4 | S1pr3       |
| 0.00E+00  | 1.19 | 0.752 | 0.067 | 0.00E+00  | Podocyte-4 | Fry         |
| 0.00E+00  | 1.13 | 0.672 | 0.003 | 0.00E+00  | Podocyte-4 | Gpc6        |
| 0.00E+00  | 1.13 | 0.655 | 0.002 | 0.00E+00  | Podocyte-4 | Atp1a2      |
| 0.00E+00  | 1.13 | 0.738 | 0.08  | 0.00E+00  | Podocyte-4 | Map3k20     |
| 0.00E+00  | 1.12 | 0.659 | 0.064 | 0.00E+00  | Podocyte-4 | Ccnd2       |
| 0.00E+00  | 1.07 | 0.603 | 0.001 | 0.00E+00  | Podocyte-4 | Olf558      |
| 0.00E+00  | 1.06 | 0.607 | 0.021 | 0.00E+00  | Podocyte-4 | Nexn        |
| 0.00E+00  | 1.05 | 0.634 | 0.014 | 0.00E+00  | Podocyte-4 | Cfh         |
| 0.00E+00  | 1.04 | 0.659 | 0.037 | 0.00E+00  | Podocyte-4 | Rcan2       |
| 0.00E+00  | 1.01 | 0.645 | 0.021 | 0.00E+00  | Podocyte-4 | Ltbp1       |
| 0.00E+00  | 0.99 | 0.707 | 0.049 | 0.00E+00  | Podocyte-4 | Serpine2    |
| 0.00E+00  | 0.99 | 0.645 | 0.017 | 0.00E+00  | Podocyte-4 | Filip1      |
| 0.00E+00  | 0.96 | 0.628 | 0.015 | 0.00E+00  | Podocyte-4 | Serpini1    |
| 0.00E+00  | 0.95 | 0.617 | 0.066 | 0.00E+00  | Podocyte-4 | Cspg4       |
| 0.00E+00  | 0.93 | 0.607 | 0.001 | 0.00E+00  | Podocyte-4 | Kcna5       |
| 0.00E+00  | 0.93 | 0.603 | 0.031 | 0.00E+00  | Podocyte-4 | Gjc1        |
| 0.00E+00  | 0.93 | 0.672 | 0.033 | 0.00E+00  | Podocyte-4 | Gucy1a1     |
| 0.00E+00  | 0.93 | 0.628 | 0.004 | 0.00E+00  | Podocyte-4 | Mrv1        |
| 0.00E+00  | 0.90 | 0.624 | 0.037 | 0.00E+00  | Podocyte-4 | Tgfb1i1     |
| 8.54E-307 | 1.74 | 0.879 | 0.162 | 2.64E-302 | Podocyte-4 | Wtip        |
| 3.40E-293 | 1.56 | 0.807 | 0.122 | 1.05E-288 | Podocyte-4 | Gng11       |
| 8.52E-290 | 1.04 | 0.717 | 0.096 | 2.64E-285 | Podocyte-4 | Marveld1    |
| 6.27E-285 | 1.69 | 0.879 | 0.167 | 1.94E-280 | Podocyte-4 | Mfge8       |
| 6.64E-280 | 1.82 | 0.866 | 0.158 | 2.06E-275 | Podocyte-4 | Csrp1       |
| 1.10E-276 | 0.82 | 0.631 | 0.075 | 3.41E-272 | Podocyte-4 | Atp2b4      |
| 3.20E-264 | 1.14 | 0.662 | 0.093 | 9.93E-260 | Podocyte-4 | Map3k7cl    |
| 3.89E-253 | 0.76 | 0.603 | 0.071 | 1.21E-248 | Podocyte-4 | Cnn2        |
| 4.89E-253 | 1.00 | 0.634 | 0.085 | 1.51E-248 | Podocyte-4 | Jag1        |
| 1.25E-244 | 1.30 | 0.841 | 0.143 | 3.88E-240 | Podocyte-4 | Ifitm3      |
| 4.21E-244 | 1.43 | 0.862 | 0.18  | 1.30E-239 | Podocyte-4 | Tinagl1     |
| 2.28E-239 | 0.86 | 0.655 | 0.097 | 7.07E-235 | Podocyte-4 | Arhgef17    |
| 1.75E-235 | 1.59 | 0.838 | 0.164 | 5.41E-231 | Podocyte-4 | Hspb1       |
| 4.09E-232 | 2.39 | 0.962 | 0.316 | 1.27E-227 | Podocyte-4 | Mylk        |
| 1.36E-224 | 2.40 | 0.948 | 0.321 | 4.22E-220 | Podocyte-4 | Tpm1        |
| 4.01E-219 | 1.31 | 0.872 | 0.203 | 1.24E-214 | Podocyte-4 | Bcam        |
| 1.72E-205 | 1.20 | 0.803 | 0.171 | 5.32E-201 | Podocyte-4 | Gsn         |
| 1.02E-190 | 1.00 | 0.7   | 0.143 | 3.17E-186 | Podocyte-4 | Crtc3       |
| 1.19E-187 | 1.77 | 0.903 | 0.325 | 3.70E-183 | Podocyte-4 | Ppp1r12a    |
| 2.57E-186 | 1.42 | 0.862 | 0.233 | 7.97E-182 | Podocyte-4 | Epas1       |
| 2.20E-184 | 1.06 | 0.697 | 0.141 | 6.82E-180 | Podocyte-4 | Utrn        |
| 8.56E-173 | 1.23 | 0.797 | 0.214 | 2.65E-168 | Podocyte-4 | Rras        |
| 4.43E-171 | 1.01 | 0.703 | 0.156 | 1.37E-166 | Podocyte-4 | 930523C07Ri |

|           |      |       |       |           |            |          |
|-----------|------|-------|-------|-----------|------------|----------|
| 2.03E-167 | 1.35 | 0.834 | 0.273 | 6.28E-163 | Podocyte-4 | Uba2     |
| 1.24E-163 | 1.08 | 0.772 | 0.212 | 3.84E-159 | Podocyte-4 | Ppp1r12c |
| 3.24E-161 | 0.68 | 0.617 | 0.106 | 1.00E-156 | Podocyte-4 | Esam     |
| 7.04E-154 | 1.00 | 0.683 | 0.146 | 2.18E-149 | Podocyte-4 | Rgs2     |
| 1.53E-151 | 1.86 | 0.997 | 0.936 | 4.74E-147 | Podocyte-4 | Myl6     |
| 1.85E-147 | 0.86 | 0.621 | 0.138 | 5.72E-143 | Podocyte-4 | Ttc28    |
| 2.83E-144 | 1.16 | 0.776 | 0.25  | 8.76E-140 | Podocyte-4 | Sorbs1   |
| 1.79E-142 | 0.77 | 0.783 | 0.194 | 5.55E-138 | Podocyte-4 | Sparc    |
| 8.42E-139 | 1.03 | 0.676 | 0.155 | 2.61E-134 | Podocyte-4 | Cd200    |
| 1.18E-127 | 1.41 | 0.9   | 0.514 | 3.67E-123 | Podocyte-4 | Rock1    |
| 1.40E-127 | 0.87 | 0.703 | 0.2   | 4.35E-123 | Podocyte-4 | Pls3     |
| 1.95E-123 | 1.34 | 0.834 | 0.362 | 6.03E-119 | Podocyte-4 | Palld    |
| 5.89E-122 | 1.06 | 0.766 | 0.23  | 1.83E-117 | Podocyte-4 | Crip2    |
| 1.43E-121 | 0.83 | 0.638 | 0.175 | 4.41E-117 | Podocyte-4 | Lgalsl   |
| 1.13E-120 | 1.34 | 0.9   | 0.446 | 3.51E-116 | Podocyte-4 | Lgals1   |
| 1.74E-116 | 0.82 | 0.693 | 0.204 | 5.38E-112 | Podocyte-4 | Bnip2    |
| 9.87E-112 | 1.20 | 0.803 | 0.333 | 3.06E-107 | Podocyte-4 | Pbxip1   |
| 1.70E-111 | 1.33 | 0.886 | 0.441 | 5.25E-107 | Podocyte-4 | Id1      |
| 1.28E-107 | 1.42 | 0.959 | 0.614 | 3.96E-103 | Podocyte-4 | Id3      |
| 2.50E-106 | 1.22 | 0.997 | 0.964 | 7.73E-102 | Podocyte-4 | Actb     |
| 2.36E-105 | 1.49 | 0.614 | 0.174 | 7.30E-101 | Podocyte-4 | Nr4a1    |
| 4.24E-105 | 1.52 | 0.955 | 0.821 | 1.31E-100 | Podocyte-4 | Dstn     |
| 8.81E-103 | 0.85 | 0.676 | 0.23  | 2.73E-98  | Podocyte-4 | Pdgfra   |
| 1.75E-101 | 1.00 | 0.786 | 0.364 | 5.43E-97  | Podocyte-4 | Crim1    |
| 2.25E-101 | 1.12 | 0.855 | 0.455 | 6.97E-97  | Podocyte-4 | Selenow  |
| 3.45E-101 | 0.92 | 0.676 | 0.231 | 1.07E-96  | Podocyte-4 | Mob2     |
| 1.53E-99  | 0.99 | 0.772 | 0.293 | 4.75E-95  | Podocyte-4 | Rarres2  |
| 4.39E-98  | 1.14 | 0.928 | 0.716 | 1.36E-93  | Podocyte-4 | Calm2    |
| 3.15E-95  | 1.04 | 0.945 | 0.677 | 9.75E-91  | Podocyte-4 | Rbpms    |
| 4.40E-93  | 0.73 | 0.776 | 0.312 | 1.36E-88  | Podocyte-4 | Igfbp5   |
| 7.79E-90  | 0.90 | 0.693 | 0.241 | 2.41E-85  | Podocyte-4 | Cpe      |
| 3.46E-89  | 0.74 | 0.676 | 0.247 | 1.07E-84  | Podocyte-4 | Rsu1     |
| 1.72E-86  | 0.85 | 0.869 | 0.52  | 5.32E-82  | Podocyte-4 | Fermt2   |
| 7.23E-86  | 0.83 | 0.734 | 0.333 | 2.24E-81  | Podocyte-4 | Rock2    |
| 4.19E-85  | 1.33 | 0.686 | 0.248 | 1.30E-80  | Podocyte-4 | Klf2     |
| 6.93E-85  | 0.86 | 0.731 | 0.298 | 2.15E-80  | Podocyte-4 | Col18a1  |
| 3.41E-84  | 0.59 | 0.7   | 0.242 | 1.06E-79  | Podocyte-4 | Cryab    |
| 1.03E-82  | 0.90 | 0.817 | 0.384 | 3.18E-78  | Podocyte-4 | Cd9      |
| 1.11E-80  | 0.91 | 0.841 | 0.532 | 3.45E-76  | Podocyte-4 | Itgb1    |
| 3.74E-77  | 1.44 | 0.679 | 0.278 | 1.16E-72  | Podocyte-4 | Cdkn1a   |
| 3.21E-76  | 0.96 | 0.821 | 0.524 | 9.94E-72  | Podocyte-4 | Ppp1cb   |
| 1.60E-75  | 0.72 | 0.662 | 0.245 | 4.95E-71  | Podocyte-4 | Tbx2     |
| 4.96E-73  | 0.94 | 0.745 | 0.398 | 1.54E-68  | Podocyte-4 | Septin7  |
| 2.36E-72  | 0.82 | 0.683 | 0.304 | 7.30E-68  | Podocyte-4 | Sh3bgrl  |
| 1.11E-71  | 0.69 | 0.697 | 0.304 | 3.44E-67  | Podocyte-4 | Ccdc85b  |
| 2.22E-68  | 0.85 | 0.852 | 0.53  | 6.87E-64  | Podocyte-4 | Btg1     |
| 3.71E-68  | 0.61 | 0.983 | 0.985 | 1.15E-63  | Podocyte-4 | Eif1     |
| 7.21E-68  | 0.76 | 0.7   | 0.354 | 2.23E-63  | Podocyte-4 | Pdcl3    |
| 4.59E-67  | 0.66 | 0.648 | 0.273 | 1.42E-62  | Podocyte-4 | Cbx6     |
| 5.43E-67  | 0.73 | 0.934 | 0.764 | 1.68E-62  | Podocyte-4 | Son      |
| 1.02E-66  | 0.63 | 0.759 | 0.289 | 3.16E-62  | Podocyte-4 | Ckb      |
| 2.29E-66  | 0.73 | 0.955 | 0.933 | 7.08E-62  | Podocyte-4 | Gnas     |
| 2.71E-66  | 0.93 | 0.952 | 0.836 | 8.40E-62  | Podocyte-4 | Cst3     |
| 7.59E-64  | 0.77 | 0.907 | 0.715 | 2.35E-59  | Podocyte-4 | Dynll1   |
| 1.28E-63  | 0.67 | 0.983 | 0.946 | 3.96E-59  | Podocyte-4 | Rpl21    |
| 5.90E-63  | 0.87 | 0.776 | 0.494 | 1.83E-58  | Podocyte-4 | Lmna     |
| 2.48E-62  | 0.85 | 0.79  | 0.515 | 7.67E-58  | Podocyte-4 | Selenom  |
| 8.99E-61  | 0.68 | 0.714 | 0.389 | 2.79E-56  | Podocyte-4 | Limd1    |
| 1.98E-60  | 0.72 | 0.845 | 0.643 | 6.13E-56  | Podocyte-4 | Prkar1a  |
| 2.53E-59  | 0.82 | 0.914 | 0.769 | 7.84E-55  | Podocyte-4 | Tsc22d1  |
| 5.41E-59  | 0.64 | 0.693 | 0.346 | 1.68E-54  | Podocyte-4 | Thra     |
| 1.44E-58  | 0.68 | 0.934 | 0.829 | 4.46E-54  | Podocyte-4 | Pfn1     |
| 1.87E-58  | 0.77 | 0.852 | 0.639 | 5.79E-54  | Podocyte-4 | Gnai2    |
| 4.52E-58  | 0.65 | 0.607 | 0.268 | 1.40E-53  | Podocyte-4 | Lims1    |

|          |      |       |       |          |            |             |
|----------|------|-------|-------|----------|------------|-------------|
| 8.66E-58 | 0.69 | 0.941 | 0.869 | 2.68E-53 | Podocyte-4 | Slc25a4     |
| 7.88E-57 | 0.62 | 0.983 | 0.97  | 2.44E-52 | Podocyte-4 | Ptma        |
| 8.72E-57 | 0.57 | 0.666 | 0.314 | 2.70E-52 | Podocyte-4 | Serpinh1    |
| 2.44E-55 | 1.33 | 0.617 | 0.297 | 7.56E-51 | Podocyte-4 | Ppp1r15a    |
| 2.29E-53 | 0.59 | 0.731 | 0.367 | 7.11E-49 | Podocyte-4 | Iqgap1      |
| 2.62E-53 | 0.57 | 0.983 | 0.905 | 8.13E-49 | Podocyte-4 | Ddx5        |
| 1.53E-52 | 0.70 | 0.69  | 0.394 | 4.73E-48 | Podocyte-4 | Arid5b      |
| 4.92E-52 | 0.61 | 0.79  | 0.496 | 1.52E-47 | Podocyte-4 | Mbnl2       |
| 6.46E-52 | 0.68 | 0.783 | 0.519 | 2.00E-47 | Podocyte-4 | Lpp         |
| 6.61E-51 | 0.62 | 0.714 | 0.417 | 2.05E-46 | Podocyte-4 | Ktn1        |
| 2.46E-50 | 0.64 | 0.645 | 0.334 | 7.63E-46 | Podocyte-4 | Col4a1      |
| 3.25E-50 | 0.52 | 0.641 | 0.282 | 1.01E-45 | Podocyte-4 | Tacc1       |
| 1.31E-49 | 0.68 | 0.676 | 0.317 | 4.07E-45 | Podocyte-4 | Hes1        |
| 1.67E-49 | 0.54 | 0.966 | 0.933 | 5.16E-45 | Podocyte-4 | H3f3b       |
| 2.65E-49 | 0.58 | 0.752 | 0.42  | 8.21E-45 | Podocyte-4 | Ifitm2      |
| 1.97E-48 | 0.84 | 0.731 | 0.445 | 6.10E-44 | Podocyte-4 | Slc38a2     |
| 3.36E-48 | 0.59 | 0.669 | 0.34  | 1.04E-43 | Podocyte-4 | Aoep        |
| 6.74E-48 | 0.63 | 0.759 | 0.517 | 2.09E-43 | Podocyte-4 | Atp2b1      |
| 3.02E-47 | 0.55 | 0.862 | 0.76  | 9.35E-43 | Podocyte-4 | Cnbp        |
| 4.20E-47 | 0.66 | 0.641 | 0.323 | 1.30E-42 | Podocyte-4 | Arpc1b      |
| 6.51E-47 | 0.62 | 0.869 | 0.72  | 2.02E-42 | Podocyte-4 | Map1lc3a    |
| 2.66E-46 | 0.61 | 0.834 | 0.646 | 8.23E-42 | Podocyte-4 | Ywhaq       |
| 3.33E-46 | 0.59 | 0.741 | 0.494 | 1.03E-41 | Podocyte-4 | Rap1a       |
| 4.38E-46 | 0.66 | 0.714 | 0.464 | 1.36E-41 | Podocyte-4 | Tln1        |
| 1.56E-45 | 0.59 | 0.821 | 0.669 | 4.82E-41 | Podocyte-4 | Nedd4       |
| 1.58E-44 | 0.58 | 0.717 | 0.44  | 4.90E-40 | Podocyte-4 | Nptn        |
| 4.39E-44 | 0.55 | 0.862 | 0.738 | 1.36E-39 | Podocyte-4 | Laptm4a     |
| 5.16E-44 | 0.66 | 0.603 | 0.315 | 1.60E-39 | Podocyte-4 | Zyx         |
| 3.81E-41 | 0.57 | 0.697 | 0.458 | 1.18E-36 | Podocyte-4 | Gna11       |
| 5.10E-41 | 1.26 | 0.769 | 0.552 | 1.58E-36 | Podocyte-4 | Junb        |
| 6.19E-41 | 0.56 | 0.69  | 0.417 | 1.92E-36 | Podocyte-4 | Blmh        |
| 1.46E-40 | 0.56 | 0.652 | 0.371 | 4.51E-36 | Podocyte-4 | Anxa11      |
| 2.94E-40 | 0.58 | 0.876 | 0.702 | 9.11E-36 | Podocyte-4 | Atp2a2      |
| 1.33E-39 | 0.59 | 0.659 | 0.415 | 4.13E-35 | Podocyte-4 | Mprip       |
| 2.52E-39 | 0.56 | 0.772 | 0.586 | 7.80E-35 | Podocyte-4 | Nenf        |
| 2.78E-37 | 0.66 | 0.876 | 0.812 | 8.61E-33 | Podocyte-4 | Calm1       |
| 7.04E-37 | 0.82 | 0.9   | 0.853 | 2.18E-32 | Podocyte-4 | Jund        |
| 1.55E-36 | 0.55 | 0.679 | 0.438 | 4.81E-32 | Podocyte-4 | Macf1       |
| 1.95E-36 | 0.51 | 0.821 | 0.678 | 6.04E-32 | Podocyte-4 | Kif5b       |
| 3.12E-36 | 0.60 | 0.69  | 0.414 | 9.67E-32 | Podocyte-4 | Rhob        |
| 3.50E-36 | 0.52 | 0.669 | 0.439 | 1.09E-31 | Podocyte-4 | 230219D22Ri |
| 5.63E-36 | 0.56 | 0.659 | 0.403 | 1.74E-31 | Podocyte-4 | Nbeal1      |
| 3.59E-35 | 0.58 | 0.714 | 0.486 | 1.11E-30 | Podocyte-4 | Cirbp       |
| 9.25E-35 | 0.59 | 0.69  | 0.469 | 2.87E-30 | Podocyte-4 | Nr2f2       |
| 1.11E-34 | 0.51 | 0.779 | 0.662 | 3.43E-30 | Podocyte-4 | Actn4       |
| 2.97E-34 | 0.56 | 0.669 | 0.439 | 9.21E-30 | Podocyte-4 | Itga1       |
| 9.75E-34 | 1.13 | 0.766 | 0.575 | 3.02E-29 | Podocyte-4 | Cebpb       |
| 1.44E-33 | 1.01 | 0.79  | 0.586 | 4.47E-29 | Podocyte-4 | Fos         |
| 8.52E-33 | 0.52 | 0.707 | 0.524 | 2.64E-28 | Podocyte-4 | Tprgl       |
| 1.14E-31 | 0.52 | 0.621 | 0.382 | 3.53E-27 | Podocyte-4 | Slmap       |
| 1.78E-31 | 0.51 | 0.717 | 0.541 | 5.51E-27 | Podocyte-4 | Gnb1        |
| 2.78E-29 | 0.72 | 0.741 | 0.483 | 8.60E-25 | Podocyte-4 | Btg2        |
| 1.85E-28 | 0.76 | 0.666 | 0.493 | 5.73E-24 | Podocyte-4 | Ccnl1       |
| 2.05E-28 | 0.56 | 0.666 | 0.454 | 6.34E-24 | Podocyte-4 | Tra2a       |
| 2.83E-28 | 0.53 | 0.721 | 0.579 | 8.76E-24 | Podocyte-4 | Purb        |
| 3.97E-28 | 0.85 | 0.628 | 0.434 | 1.23E-23 | Podocyte-4 | Ier2        |
| 1.55E-27 | 0.56 | 0.755 | 0.64  | 4.81E-23 | Podocyte-4 | Drap1       |
| 5.88E-26 | 0.53 | 0.603 | 0.37  | 1.82E-21 | Podocyte-4 | Kcnq1ot1    |
| 7.79E-24 | 0.98 | 0.652 | 0.487 | 2.41E-19 | Podocyte-4 | Egr1        |
| 1.41E-23 | 0.52 | 0.648 | 0.501 | 4.38E-19 | Podocyte-4 | Clic4       |
| 9.99E-23 | 0.72 | 0.628 | 0.491 | 3.09E-18 | Podocyte-4 | Tob2        |
| 7.01E-22 | 0.57 | 0.693 | 0.524 | 2.17E-17 | Podocyte-4 | Nfkbia      |
| 4.12E-19 | 0.52 | 0.676 | 0.557 | 1.28E-14 | Podocyte-4 | Tagln2      |
| 0.00E+00 | 1.67 | 0.836 | 0.084 | 0.00E+00 | Podocyte-5 | Cald1       |

|           |      |       |       |           |            |             |
|-----------|------|-------|-------|-----------|------------|-------------|
| 0.00E+00  | 1.65 | 0.804 | 0.031 | 0.00E+00  | Podocyte-5 | Cp          |
| 0.00E+00  | 1.46 | 0.644 | 0.034 | 0.00E+00  | Podocyte-5 | Akap12      |
| 0.00E+00  | 1.31 | 0.764 | 0.087 | 0.00E+00  | Podocyte-5 | Timp2       |
| 1.14E-307 | 0.98 | 0.655 | 0.066 | 3.54E-303 | Podocyte-5 | Tshz2       |
| 7.68E-208 | 2.53 | 0.876 | 0.24  | 2.38E-203 | Podocyte-5 | Cryab       |
| 3.33E-204 | 1.51 | 0.924 | 0.234 | 1.03E-199 | Podocyte-5 | Tmsb10      |
| 7.59E-202 | 1.27 | 0.68  | 0.112 | 2.35E-197 | Podocyte-5 | Nupr1       |
| 9.05E-197 | 0.84 | 0.636 | 0.098 | 2.80E-192 | Podocyte-5 | Scin        |
| 9.28E-197 | 1.00 | 0.618 | 0.096 | 2.88E-192 | Podocyte-5 | Thbs1       |
| 2.67E-164 | 0.94 | 0.724 | 0.157 | 8.28E-160 | Podocyte-5 | 930523C07Ri |
| 2.59E-163 | 1.00 | 0.825 | 0.204 | 8.03E-159 | Podocyte-5 | Bcam        |
| 4.14E-163 | 0.85 | 0.625 | 0.117 | 1.28E-158 | Podocyte-5 | Actn1       |
| 1.17E-150 | 0.62 | 0.633 | 0.12  | 3.62E-146 | Podocyte-5 | Capg        |
| 1.16E-142 | 0.87 | 0.756 | 0.173 | 3.61E-138 | Podocyte-5 | Anxa2       |
| 5.61E-140 | 1.16 | 0.716 | 0.166 | 1.74E-135 | Podocyte-5 | Hspb1       |
| 1.29E-138 | 1.24 | 0.72  | 0.182 | 4.00E-134 | Podocyte-5 | Tinagl1     |
| 3.25E-131 | 1.38 | 0.938 | 0.514 | 1.01E-126 | Podocyte-5 | S100a11     |
| 7.03E-122 | 1.07 | 0.833 | 0.323 | 2.18E-117 | Podocyte-5 | Tpm1        |
| 9.70E-119 | 0.65 | 0.647 | 0.148 | 3.00E-114 | Podocyte-5 | Klf7        |
| 2.42E-113 | 0.84 | 0.676 | 0.173 | 7.50E-109 | Podocyte-5 | Gsn         |
| 7.33E-113 | 0.89 | 0.756 | 0.247 | 2.27E-108 | Podocyte-5 | Litaf       |
| 7.82E-112 | 1.01 | 0.789 | 0.273 | 2.42E-107 | Podocyte-5 | Tns3        |
| 1.35E-107 | 0.74 | 0.669 | 0.203 | 4.17E-103 | Podocyte-5 | Ptpn13      |
| 5.03E-107 | 1.14 | 0.767 | 0.298 | 1.56E-102 | Podocyte-5 | Col18a1     |
| 7.73E-105 | 0.88 | 0.844 | 0.34  | 2.39E-100 | Podocyte-5 | Ifi27       |
| 1.39E-104 | 1.08 | 0.811 | 0.332 | 4.31E-100 | Podocyte-5 | Col4a1      |
| 2.99E-103 | 1.35 | 0.713 | 0.244 | 9.28E-99  | Podocyte-5 | Adams1      |
| 6.72E-103 | 1.14 | 1     | 0.932 | 2.08E-98  | Podocyte-5 | H3f3b       |
| 2.91E-102 | 1.14 | 0.695 | 0.212 | 9.00E-98  | Podocyte-5 | Sox4        |
| 3.18E-100 | 1.03 | 0.833 | 0.386 | 9.85E-96  | Podocyte-5 | Dag1        |
| 1.12E-98  | 1.01 | 0.942 | 0.649 | 3.46E-94  | Podocyte-5 | Myl12a      |
| 2.70E-98  | 0.75 | 0.615 | 0.174 | 8.37E-94  | Podocyte-5 | Hoxb9       |
| 1.43E-97  | 0.86 | 0.996 | 0.97  | 4.43E-93  | Podocyte-5 | Ptma        |
| 6.79E-96  | 1.39 | 0.996 | 0.922 | 2.10E-91  | Podocyte-5 | Igfbp7      |
| 1.00E-93  | 0.77 | 0.996 | 0.92  | 3.11E-89  | Podocyte-5 | H3f3a       |
| 2.16E-91  | 0.67 | 0.745 | 0.264 | 6.69E-87  | Podocyte-5 | Serpinb6a   |
| 1.29E-88  | 0.79 | 0.662 | 0.191 | 3.98E-84  | Podocyte-5 | Lgals3      |
| 1.06E-86  | 0.78 | 0.676 | 0.207 | 3.29E-82  | Podocyte-5 | Tspan8      |
| 1.33E-86  | 0.94 | 0.644 | 0.196 | 4.11E-82  | Podocyte-5 | Sparc       |
| 5.96E-86  | 0.73 | 0.673 | 0.233 | 1.85E-81  | Podocyte-5 | Vcl         |
| 3.27E-85  | 0.76 | 0.618 | 0.167 | 1.01E-80  | Podocyte-5 | Kcnk1       |
| 3.63E-85  | 0.94 | 0.84  | 0.429 | 1.12E-80  | Podocyte-5 | Anxa5       |
| 3.34E-84  | 1.24 | 0.895 | 0.666 | 1.03E-79  | Podocyte-5 | Slc6a6      |
| 2.94E-83  | 1.21 | 0.618 | 0.17  | 9.12E-79  | Podocyte-5 | Mfge8       |
| 3.04E-83  | 0.69 | 0.618 | 0.201 | 9.43E-79  | Podocyte-5 | Mid1ip1     |
| 6.21E-83  | 0.87 | 0.909 | 0.532 | 1.92E-78  | Podocyte-5 | Itgb1       |
| 1.53E-82  | 1.15 | 0.825 | 0.562 | 4.75E-78  | Podocyte-5 | Bicc1       |
| 2.43E-82  | 1.28 | 0.662 | 0.219 | 7.52E-78  | Podocyte-5 | Epcam       |
| 3.90E-82  | 0.55 | 0.618 | 0.182 | 1.21E-77  | Podocyte-5 | Sema5a      |
| 5.16E-82  | 0.66 | 0.771 | 0.299 | 1.60E-77  | Podocyte-5 | Iitm2c      |
| 8.53E-80  | 0.64 | 0.698 | 0.235 | 2.64E-75  | Podocyte-5 | Cd82        |
| 5.33E-79  | 0.66 | 0.996 | 0.936 | 1.65E-74  | Podocyte-5 | Myl6        |
| 9.10E-79  | 0.69 | 1     | 0.946 | 2.82E-74  | Podocyte-5 | Rpl21       |
| 5.91E-78  | 0.86 | 0.942 | 0.715 | 1.83E-73  | Podocyte-5 | Dynll1      |
| 3.62E-77  | 0.58 | 0.993 | 0.972 | 1.12E-72  | Podocyte-5 | Rps16       |
| 3.22E-76  | 0.77 | 0.633 | 0.231 | 9.98E-72  | Podocyte-5 | Pdgfa       |
| 1.26E-74  | 0.91 | 0.727 | 0.298 | 3.91E-70  | Podocyte-5 | Ier5        |
| 1.31E-74  | 0.67 | 0.793 | 0.358 | 4.07E-70  | Podocyte-5 | Msn         |
| 6.23E-73  | 1.11 | 0.913 | 0.615 | 1.93E-68  | Podocyte-5 | Id3         |
| 1.04E-72  | 0.88 | 0.993 | 0.965 | 3.22E-68  | Podocyte-5 | Actb        |
| 1.50E-72  | 0.51 | 0.611 | 0.212 | 4.65E-68  | Podocyte-5 | Smtn        |
| 2.90E-72  | 0.83 | 0.72  | 0.338 | 9.00E-68  | Podocyte-5 | Pax8        |
| 3.98E-72  | 1.23 | 0.949 | 0.763 | 1.23E-67  | Podocyte-5 | Gstm1       |
| 5.95E-70  | 0.73 | 0.687 | 0.28  | 1.84E-65  | Podocyte-5 | Bex3        |

|          |      |       |       |          |            |             |
|----------|------|-------|-------|----------|------------|-------------|
| 6.50E-70 | 1.14 | 0.92  | 0.759 | 2.01E-65 | Podocyte-5 | S100a10     |
| 1.86E-69 | 0.59 | 0.705 | 0.288 | 5.75E-65 | Podocyte-5 | Anxa4       |
| 3.41E-69 | 0.70 | 0.935 | 0.625 | 1.06E-64 | Podocyte-5 | H2-D1       |
| 2.11E-68 | 0.62 | 0.705 | 0.277 | 6.53E-64 | Podocyte-5 | Tpm4        |
| 4.94E-68 | 0.68 | 0.651 | 0.248 | 1.53E-63 | Podocyte-5 | Smchd1      |
| 6.71E-68 | 0.91 | 0.924 | 0.696 | 2.08E-63 | Podocyte-5 | H2-K1       |
| 6.55E-67 | 0.52 | 1     | 0.99  | 2.03E-62 | Podocyte-5 | Iitm2b      |
| 8.93E-67 | 1.01 | 0.658 | 0.271 | 2.77E-62 | Podocyte-5 | Ahnak       |
| 1.93E-66 | 1.06 | 0.935 | 0.853 | 5.97E-62 | Podocyte-5 | Jund        |
| 6.69E-66 | 0.62 | 0.935 | 0.638 | 2.07E-61 | Podocyte-5 | Gnai2       |
| 1.07E-65 | 0.61 | 0.993 | 0.915 | 3.30E-61 | Podocyte-5 | Rpl3        |
| 4.44E-65 | 0.70 | 0.924 | 0.678 | 1.38E-60 | Podocyte-5 | Rbpms       |
| 3.59E-64 | 0.68 | 0.676 | 0.238 | 1.11E-59 | Podocyte-5 | Gadd45b     |
| 3.74E-63 | 0.64 | 0.742 | 0.35  | 1.16E-58 | Podocyte-5 | Nfat5       |
| 3.80E-63 | 0.66 | 0.738 | 0.346 | 1.18E-58 | Podocyte-5 | Thra        |
| 4.62E-62 | 0.76 | 0.767 | 0.438 | 1.43E-57 | Podocyte-5 | Itga1       |
| 4.96E-62 | 0.60 | 0.964 | 0.811 | 1.54E-57 | Podocyte-5 | Calm1       |
| 1.23E-61 | 1.52 | 0.687 | 0.327 | 3.80E-57 | Podocyte-5 | Atf3        |
| 1.79E-61 | 0.78 | 0.782 | 0.413 | 5.56E-57 | Podocyte-5 | Tceal9      |
| 1.95E-61 | 0.51 | 0.993 | 0.964 | 6.05E-57 | Podocyte-5 | Rpl9        |
| 3.30E-61 | 0.53 | 0.996 | 0.973 | 1.02E-56 | Podocyte-5 | Rps3a1      |
| 4.69E-61 | 0.70 | 0.873 | 0.626 | 1.45E-56 | Podocyte-5 | 810037117Ri |
| 1.28E-60 | 0.62 | 0.873 | 0.455 | 3.97E-56 | Podocyte-5 | Selenow     |
| 3.77E-60 | 1.12 | 0.782 | 0.494 | 1.17E-55 | Podocyte-5 | Lmna        |
| 6.86E-60 | 0.62 | 0.935 | 0.737 | 2.13E-55 | Podocyte-5 | Laptm4a     |
| 7.56E-60 | 0.66 | 0.775 | 0.413 | 2.34E-55 | Podocyte-5 | Myh9        |
| 2.73E-59 | 0.60 | 0.935 | 0.749 | 8.45E-55 | Podocyte-5 | Sumo2       |
| 2.84E-58 | 0.76 | 0.815 | 0.542 | 8.81E-54 | Podocyte-5 | Rtn4        |
| 4.68E-58 | 1.19 | 0.836 | 0.482 | 1.45E-53 | Podocyte-5 | Btg2        |
| 9.83E-58 | 0.62 | 0.731 | 0.353 | 3.05E-53 | Podocyte-5 | Atp1b3      |
| 1.41E-57 | 0.62 | 0.891 | 0.722 | 4.36E-53 | Podocyte-5 | Hmgn1       |
| 1.95E-57 | 0.65 | 0.615 | 0.262 | 6.03E-53 | Podocyte-5 | Spns2       |
| 2.87E-56 | 0.71 | 0.804 | 0.499 | 8.88E-52 | Podocyte-5 | Clic4       |
| 4.35E-56 | 0.64 | 0.625 | 0.263 | 1.35E-51 | Podocyte-5 | Col4a2      |
| 7.73E-56 | 0.58 | 0.964 | 0.862 | 2.39E-51 | Podocyte-5 | App         |
| 8.08E-56 | 0.78 | 0.84  | 0.676 | 2.50E-51 | Podocyte-5 | Spint2      |
| 9.50E-56 | 0.88 | 0.924 | 0.769 | 2.94E-51 | Podocyte-5 | Tsc22d1     |
| 1.40E-54 | 0.93 | 0.698 | 0.355 | 4.35E-50 | Podocyte-5 | Npnt        |
| 3.70E-54 | 0.68 | 0.844 | 0.591 | 1.15E-49 | Podocyte-5 | Clic1       |
| 4.25E-54 | 0.60 | 0.895 | 0.645 | 1.32E-49 | Podocyte-5 | Ywhaq       |
| 5.11E-54 | 0.58 | 0.862 | 0.585 | 1.58E-49 | Podocyte-5 | Nenf        |
| 7.69E-54 | 0.70 | 0.76  | 0.46  | 2.38E-49 | Podocyte-5 | Syne2       |
| 2.75E-53 | 0.54 | 0.847 | 0.54  | 8.51E-49 | Podocyte-5 | Gnb1        |
| 3.96E-53 | 0.57 | 0.873 | 0.52  | 1.23E-48 | Podocyte-5 | Fermt2      |
| 4.24E-53 | 0.53 | 0.749 | 0.366 | 1.31E-48 | Podocyte-5 | Rbms1       |
| 6.07E-53 | 0.61 | 0.709 | 0.334 | 1.88E-48 | Podocyte-5 | Rock2       |
| 6.68E-53 | 0.74 | 0.996 | 0.963 | 2.07E-48 | Podocyte-5 | Actg1       |
| 6.88E-53 | 1.03 | 0.847 | 0.551 | 2.13E-48 | Podocyte-5 | Junb        |
| 1.84E-51 | 0.61 | 0.775 | 0.398 | 5.69E-47 | Podocyte-5 | Septin7     |
| 2.38E-51 | 0.68 | 0.738 | 0.399 | 7.36E-47 | Podocyte-5 | Ctdspl      |
| 3.03E-51 | 1.12 | 0.665 | 0.356 | 9.38E-47 | Podocyte-5 | Ifrd1       |
| 3.91E-51 | 0.52 | 0.625 | 0.252 | 1.21E-46 | Podocyte-5 | Klf4        |
| 5.10E-51 | 0.56 | 0.753 | 0.402 | 1.58E-46 | Podocyte-5 | Nbeal1      |
| 5.83E-51 | 0.60 | 0.887 | 0.669 | 1.81E-46 | Podocyte-5 | Nedd4       |
| 9.97E-51 | 0.56 | 0.938 | 0.798 | 3.09E-46 | Podocyte-5 | Cfl1        |
| 4.74E-50 | 1.13 | 0.778 | 0.486 | 1.47E-45 | Podocyte-5 | Egr1        |
| 5.06E-50 | 0.67 | 0.665 | 0.346 | 1.57E-45 | Podocyte-5 | Midn        |
| 3.27E-49 | 1.13 | 0.804 | 0.558 | 1.01E-44 | Podocyte-5 | Klf6        |
| 1.28E-48 | 0.62 | 0.695 | 0.365 | 3.97E-44 | Podocyte-5 | Crim1       |
| 1.60E-48 | 0.57 | 0.833 | 0.531 | 4.95E-44 | Podocyte-5 | Btg1        |
| 9.30E-48 | 0.82 | 0.887 | 0.812 | 2.88E-43 | Podocyte-5 | Sdc4        |
| 1.82E-47 | 0.77 | 0.807 | 0.556 | 5.64E-43 | Podocyte-5 | Tagln2      |
| 4.61E-47 | 1.37 | 0.658 | 0.379 | 1.43E-42 | Podocyte-5 | Fosb        |
| 5.12E-47 | 0.50 | 0.724 | 0.317 | 1.59E-42 | Podocyte-5 | Hes1        |



|           |      |       |       |           |            |             |
|-----------|------|-------|-------|-----------|------------|-------------|
| 7.05E-47  | 0.63 | 0.76  | 0.413 | 2.18E-42  | Podocyte-5 | Rhob        |
| 1.82E-46  | 0.64 | 0.655 | 0.297 | 5.63E-42  | Podocyte-5 | Ppp1r15a    |
| 6.05E-46  | 0.52 | 0.811 | 0.496 | 1.87E-41  | Podocyte-5 | Mbnl2       |
| 6.33E-46  | 0.77 | 0.876 | 0.691 | 1.96E-41  | Podocyte-5 | Zfp36l1     |
| 1.20E-45  | 0.84 | 0.804 | 0.575 | 3.72E-41  | Podocyte-5 | Cebpb       |
| 2.47E-45  | 1.55 | 0.891 | 0.738 | 7.64E-41  | Podocyte-5 | Spp1        |
| 3.60E-45  | 0.51 | 0.764 | 0.439 | 1.12E-40  | Podocyte-5 | 230219D22Ri |
| 9.67E-45  | 0.51 | 0.793 | 0.439 | 2.99E-40  | Podocyte-5 | Tmem50a     |
| 3.66E-44  | 0.72 | 0.84  | 0.53  | 1.13E-39  | Podocyte-5 | Tmsb4x      |
| 4.33E-44  | 0.56 | 0.742 | 0.446 | 1.34E-39  | Podocyte-5 | Tpm3        |
| 2.97E-43  | 0.50 | 0.982 | 0.905 | 9.21E-39  | Podocyte-5 | Ddx5        |
| 3.21E-43  | 0.51 | 0.96  | 0.807 | 9.94E-39  | Podocyte-5 | Rabac1      |
| 3.71E-43  | 0.54 | 0.913 | 0.669 | 1.15E-38  | Podocyte-5 | B2m         |
| 7.35E-43  | 1.59 | 0.658 | 0.411 | 2.28E-38  | Podocyte-5 | Hbegf       |
| 2.89E-42  | 0.50 | 0.938 | 0.764 | 8.95E-38  | Podocyte-5 | Son         |
| 6.35E-42  | 0.50 | 0.691 | 0.369 | 1.97E-37  | Podocyte-5 | Eid1        |
| 6.35E-42  | 0.68 | 0.673 | 0.372 | 1.97E-37  | Podocyte-5 | Lmo7        |
| 2.94E-41  | 0.55 | 0.778 | 0.444 | 9.10E-37  | Podocyte-5 | Slc38a2     |
| 8.90E-41  | 0.78 | 0.753 | 0.442 | 2.76E-36  | Podocyte-5 | Id1         |
| 3.87E-40  | 0.51 | 0.793 | 0.53  | 1.20E-35  | Podocyte-5 | Hnrnpa1     |
| 1.19E-39  | 0.50 | 0.662 | 0.375 | 3.69E-35  | Podocyte-5 | Chd9        |
| 1.35E-39  | 0.54 | 0.658 | 0.356 | 4.17E-35  | Podocyte-5 | Lamb1       |
| 1.97E-39  | 0.69 | 0.785 | 0.523 | 6.12E-35  | Podocyte-5 | Nfkbia      |
| 4.40E-38  | 0.80 | 0.753 | 0.468 | 1.36E-33  | Podocyte-5 | Nr2f2       |
| 9.69E-38  | 0.56 | 0.655 | 0.378 | 3.00E-33  | Podocyte-5 | Eif1a       |
| 2.46E-37  | 0.55 | 0.764 | 0.52  | 7.61E-33  | Podocyte-5 | Adgrg1      |
| 3.47E-37  | 0.96 | 0.702 | 0.415 | 1.08E-32  | Podocyte-5 | Ier3        |
| 1.39E-36  | 0.63 | 0.615 | 0.32  | 4.30E-32  | Podocyte-5 | Mylk        |
| 2.44E-36  | 0.59 | 0.618 | 0.328 | 7.56E-32  | Podocyte-5 | Kdm6b       |
| 7.21E-36  | 0.51 | 0.669 | 0.372 | 2.23E-31  | Podocyte-5 | Ankrd12     |
| 8.89E-36  | 0.62 | 0.851 | 0.722 | 2.76E-31  | Podocyte-5 | Pnrc1       |
| 2.43E-35  | 0.50 | 0.825 | 0.637 | 7.52E-31  | Podocyte-5 | Mcl1        |
| 1.04E-34  | 1.01 | 0.785 | 0.586 | 3.23E-30  | Podocyte-5 | Fos         |
| 1.16E-34  | 0.52 | 0.749 | 0.426 | 3.59E-30  | Podocyte-5 | Mxd4        |
| 2.37E-33  | 0.73 | 0.782 | 0.585 | 7.34E-29  | Podocyte-5 | Wwc1        |
| 5.93E-33  | 0.89 | 0.756 | 0.641 | 1.84E-28  | Podocyte-5 | Cstb        |
| 3.39E-32  | 0.50 | 0.655 | 0.37  | 1.05E-27  | Podocyte-5 | Kcnq1ot1    |
| 3.41E-31  | 0.55 | 0.793 | 0.584 | 1.06E-26  | Podocyte-5 | Zfand5      |
| 2.83E-29  | 0.63 | 0.942 | 0.886 | 8.75E-25  | Podocyte-5 | Tmem176b    |
| 1.22E-26  | 0.53 | 0.625 | 0.312 | 3.78E-22  | Podocyte-5 | Cd24a       |
| 1.37E-26  | 0.69 | 0.669 | 0.435 | 4.24E-22  | Podocyte-5 | Ccn1        |
| 1.70E-26  | 0.54 | 0.76  | 0.521 | 5.27E-22  | Podocyte-5 | Cyb5r3      |
| 8.40E-25  | 1.25 | 0.665 | 0.529 | 2.60E-20  | Podocyte-5 | Krt8        |
| 2.57E-22  | 0.68 | 0.953 | 0.901 | 7.96E-18  | Podocyte-5 | Ndufb8      |
| 5.70E-20  | 0.71 | 0.684 | 0.539 | 1.76E-15  | Podocyte-5 | Chka        |
| 2.68E-18  | 0.69 | 0.709 | 0.59  | 8.31E-14  | Podocyte-5 | Zfp36       |
| 6.95E-18  | 0.67 | 0.647 | 0.467 | 2.15E-13  | Podocyte-5 | H1f2        |
| 6.07E-14  | 0.54 | 0.607 | 0.449 | 1.88E-09  | Podocyte-5 | Lgals1      |
| 8.03E-12  | 0.51 | 0.633 | 0.378 | 2.49E-07  | Podocyte-5 | Wfdc2       |
| 1.21E-274 | 0.62 | 0.755 | 0.083 | 3.75E-270 | Podocyte-6 | Kdr         |
| 1.32E-178 | 0.57 | 0.678 | 0.103 | 4.09E-174 | Podocyte-6 | Ehd3        |
| 3.14E-169 | 0.51 | 0.727 | 0.117 | 9.73E-165 | Podocyte-6 | Meis2       |
| 4.19E-156 | 0.66 | 0.796 | 0.167 | 1.30E-151 | Podocyte-6 | Plat        |
| 0.00E+00  | 4.56 | 0.993 | 0.183 | 0.00E+00  | Macrophage | Cd74        |
| 0.00E+00  | 4.25 | 0.788 | 0.025 | 0.00E+00  | Macrophage | Ccl4        |
| 0.00E+00  | 4.17 | 0.987 | 0.076 | 0.00E+00  | Macrophage | H2-Eb1      |
| 0.00E+00  | 4.05 | 0.986 | 0.076 | 0.00E+00  | Macrophage | H2-Aa       |
| 0.00E+00  | 3.82 | 0.983 | 0.154 | 0.00E+00  | Macrophage | H2-Ab1      |
| 0.00E+00  | 3.65 | 0.793 | 0.013 | 0.00E+00  | Macrophage | Ccl3        |
| 0.00E+00  | 3.48 | 0.957 | 0.007 | 0.00E+00  | Macrophage | C1qa        |
| 0.00E+00  | 3.48 | 0.968 | 0.01  | 0.00E+00  | Macrophage | C1qb        |
| 0.00E+00  | 3.17 | 0.61  | 0.028 | 0.00E+00  | Macrophage | Cxcl2       |
| 0.00E+00  | 3.17 | 0.818 | 0.023 | 0.00E+00  | Macrophage | Ii1b        |
| 0.00E+00  | 2.97 | 0.935 | 0.005 | 0.00E+00  | Macrophage | C1qc        |

|          |      |       |       |          |            |          |
|----------|------|-------|-------|----------|------------|----------|
| 0.00E+00 | 2.93 | 0.964 | 0.023 | 0.00E+00 | Macrophage | Ctss     |
| 0.00E+00 | 2.76 | 0.973 | 0.031 | 0.00E+00 | Macrophage | Fcer1g   |
| 0.00E+00 | 2.73 | 0.93  | 0.028 | 0.00E+00 | Macrophage | Lyz2     |
| 0.00E+00 | 2.59 | 0.783 | 0.013 | 0.00E+00 | Macrophage | Rgs1     |
| 0.00E+00 | 2.49 | 0.966 | 0.024 | 0.00E+00 | Macrophage | Tyrobp   |
| 0.00E+00 | 2.48 | 0.871 | 0.041 | 0.00E+00 | Macrophage | Cd14     |
| 0.00E+00 | 2.43 | 0.792 | 0.026 | 0.00E+00 | Macrophage | Cd83     |
| 0.00E+00 | 2.33 | 0.958 | 0.032 | 0.00E+00 | Macrophage | Cd52     |
| 0.00E+00 | 2.12 | 0.999 | 0.521 | 0.00E+00 | Macrophage | Tmsb4x   |
| 0.00E+00 | 2.11 | 0.689 | 0.013 | 0.00E+00 | Macrophage | Tnf      |
| 0.00E+00 | 2.06 | 0.993 | 0.833 | 0.00E+00 | Macrophage | Cst3     |
| 0.00E+00 | 2.01 | 0.877 | 0.121 | 0.00E+00 | Macrophage | H2-DMb1  |
| 0.00E+00 | 1.96 | 0.881 | 0.316 | 0.00E+00 | Macrophage | Atf3     |
| 0.00E+00 | 1.95 | 0.791 | 0.173 | 0.00E+00 | Macrophage | Mafb     |
| 0.00E+00 | 1.91 | 0.739 | 0.013 | 0.00E+00 | Macrophage | Bcl2a1b  |
| 0.00E+00 | 1.90 | 0.854 | 0.009 | 0.00E+00 | Macrophage | Fcgr3    |
| 0.00E+00 | 1.88 | 0.885 | 0.132 | 0.00E+00 | Macrophage | Ctsc     |
| 0.00E+00 | 1.87 | 0.858 | 0.288 | 0.00E+00 | Macrophage | Ier5     |
| 0.00E+00 | 1.86 | 0.89  | 0.025 | 0.00E+00 | Macrophage | Laptm5   |
| 0.00E+00 | 1.83 | 0.713 | 0.002 | 0.00E+00 | Macrophage | Ms4a7    |
| 0.00E+00 | 1.81 | 0.808 | 0.019 | 0.00E+00 | Macrophage | Fyb      |
| 0.00E+00 | 1.80 | 0.831 | 0.028 | 0.00E+00 | Macrophage | Rgs10    |
| 0.00E+00 | 1.78 | 0.855 | 0.061 | 0.00E+00 | Macrophage | H2-DMa   |
| 0.00E+00 | 1.77 | 0.9   | 0.096 | 0.00E+00 | Macrophage | Fxyd5    |
| 0.00E+00 | 1.77 | 0.937 | 0.515 | 0.00E+00 | Macrophage | Nfkbia   |
| 0.00E+00 | 1.74 | 0.868 | 0.09  | 0.00E+00 | Macrophage | Unc93b1  |
| 0.00E+00 | 1.74 | 0.74  | 0.169 | 0.00E+00 | Macrophage | Pim1     |
| 0.00E+00 | 1.72 | 0.976 | 0.619 | 0.00E+00 | Macrophage | H2-D1    |
| 0.00E+00 | 1.69 | 0.699 | 0.011 | 0.00E+00 | Macrophage | Basp1    |
| 0.00E+00 | 1.68 | 0.7   | 0.012 | 0.00E+00 | Macrophage | Wfdc17   |
| 0.00E+00 | 1.66 | 0.803 | 0.096 | 0.00E+00 | Macrophage | Trf      |
| 0.00E+00 | 1.64 | 0.73  | 0.034 | 0.00E+00 | Macrophage | Ifi27l2a |
| 0.00E+00 | 1.64 | 0.801 | 0.045 | 0.00E+00 | Macrophage | Csf1r    |
| 0.00E+00 | 1.64 | 0.855 | 0.217 | 0.00E+00 | Macrophage | Cxcl16   |
| 0.00E+00 | 1.60 | 0.892 | 0.119 | 0.00E+00 | Macrophage | Srgn     |
| 0.00E+00 | 1.60 | 0.782 | 0.01  | 0.00E+00 | Macrophage | Cd300c2  |
| 0.00E+00 | 1.59 | 0.786 | 0.014 | 0.00E+00 | Macrophage | Cybb     |
| 0.00E+00 | 1.54 | 0.815 | 0.026 | 0.00E+00 | Macrophage | Coro1a   |
| 0.00E+00 | 1.50 | 0.719 | 0.007 | 0.00E+00 | Macrophage | Slamf9   |
| 0.00E+00 | 1.50 | 0.735 | 0.011 | 0.00E+00 | Macrophage | Ly86     |
| 0.00E+00 | 1.47 | 0.813 | 0.296 | 0.00E+00 | Macrophage | Nfkbiz   |
| 0.00E+00 | 1.46 | 0.617 | 0.02  | 0.00E+00 | Macrophage | Stap1    |
| 0.00E+00 | 1.44 | 0.66  | 0.023 | 0.00E+00 | Macrophage | Ifi207   |
| 0.00E+00 | 1.44 | 0.723 | 0.024 | 0.00E+00 | Macrophage | Alox5ap  |
| 0.00E+00 | 1.44 | 0.66  | 0.009 | 0.00E+00 | Macrophage | Lilr4b   |
| 0.00E+00 | 1.42 | 0.638 | 0.006 | 0.00E+00 | Macrophage | Gm34084  |
| 0.00E+00 | 1.42 | 0.68  | 0.012 | 0.00E+00 | Macrophage | Pou2f2   |
| 0.00E+00 | 1.40 | 0.689 | 0.015 | 0.00E+00 | Macrophage | Tgfb1    |
| 0.00E+00 | 1.38 | 0.765 | 0.033 | 0.00E+00 | Macrophage | Ptprc    |
| 0.00E+00 | 1.38 | 0.773 | 0.164 | 0.00E+00 | Macrophage | Fcgr2b   |
| 0.00E+00 | 1.38 | 0.663 | 0.012 | 0.00E+00 | Macrophage | Cd86     |
| 0.00E+00 | 1.36 | 0.704 | 0.026 | 0.00E+00 | Macrophage | Cd68     |
| 0.00E+00 | 1.36 | 0.753 | 0.074 | 0.00E+00 | Macrophage | Lcp1     |
| 0.00E+00 | 1.35 | 0.644 | 0.036 | 0.00E+00 | Macrophage | Neur13   |
| 0.00E+00 | 1.34 | 0.676 | 0.002 | 0.00E+00 | Macrophage | C3ar1    |
| 0.00E+00 | 1.33 | 0.775 | 0.128 | 0.00E+00 | Macrophage | Ptpn18   |
| 0.00E+00 | 1.32 | 0.68  | 0.013 | 0.00E+00 | Macrophage | Pld4     |
| 0.00E+00 | 1.30 | 0.646 | 0.006 | 0.00E+00 | Macrophage | Aif1     |
| 0.00E+00 | 1.29 | 0.677 | 0.017 | 0.00E+00 | Macrophage | Lst1     |
| 0.00E+00 | 1.27 | 0.71  | 0.182 | 0.00E+00 | Macrophage | Lgals3   |
| 0.00E+00 | 1.26 | 0.683 | 0.013 | 0.00E+00 | Macrophage | Mpeg1    |
| 0.00E+00 | 1.25 | 0.666 | 0.004 | 0.00E+00 | Macrophage | Adgre1   |
| 0.00E+00 | 1.23 | 0.633 | 0.07  | 0.00E+00 | Macrophage | Rel      |
| 0.00E+00 | 1.23 | 0.677 | 0.055 | 0.00E+00 | Macrophage | Marcks   |

|           |      |       |       |           |            |             |
|-----------|------|-------|-------|-----------|------------|-------------|
| 0.00E+00  | 1.22 | 0.74  | 0.181 | 0.00E+00  | Macrophage | Efh2        |
| 0.00E+00  | 1.21 | 0.677 | 0.03  | 0.00E+00  | Macrophage | Tm6sf1      |
| 0.00E+00  | 1.21 | 0.611 | 0.007 | 0.00E+00  | Macrophage | Slamf7      |
| 0.00E+00  | 1.21 | 0.651 | 0.015 | 0.00E+00  | Macrophage | Spi1        |
| 0.00E+00  | 1.20 | 0.661 | 0.089 | 0.00E+00  | Macrophage | Stk17b      |
| 0.00E+00  | 1.12 | 1     | 0.985 | 0.00E+00  | Macrophage | Fau         |
| 0.00E+00  | 1.08 | 0.61  | 0.02  | 0.00E+00  | Macrophage | Ncf2        |
| 0.00E+00  | 1.03 | 0.67  | 0.101 | 0.00E+00  | Macrophage | Psm8        |
| 0.00E+00  | 0.99 | 0.617 | 0.09  | 0.00E+00  | Macrophage | Tgfb1       |
| 0.00E+00  | 0.97 | 0.61  | 0.049 | 0.00E+00  | Macrophage | Arhgdib     |
| 0.00E+00  | 0.95 | 0.608 | 0.124 | 0.00E+00  | Macrophage | Fam49b      |
| 5.18E-308 | 1.58 | 0.971 | 0.691 | 1.61E-303 | Macrophage | H2-K1       |
| 8.69E-307 | 1.20 | 0.999 | 0.966 | 2.69E-302 | Macrophage | Rps9        |
| 1.05E-300 | 0.98 | 0.615 | 0.152 | 3.24E-296 | Macrophage | Irf8        |
| 1.14E-299 | 1.24 | 0.709 | 0.203 | 3.52E-295 | Macrophage | Kctd12      |
| 6.43E-298 | 1.34 | 0.974 | 0.663 | 1.99E-293 | Macrophage | B2m         |
| 1.11E-292 | 1.05 | 1     | 0.979 | 3.44E-288 | Macrophage | Rps24       |
| 1.20E-288 | 1.30 | 0.945 | 0.662 | 3.71E-284 | Macrophage | Npc2        |
| 1.50E-282 | 1.31 | 0.927 | 0.572 | 4.65E-278 | Macrophage | Ctsh        |
| 7.72E-281 | 1.25 | 0.923 | 0.455 | 2.39E-276 | Macrophage | Ucp2        |
| 2.48E-279 | 1.12 | 0.994 | 0.921 | 7.69E-275 | Macrophage | Psap        |
| 7.34E-279 | 1.36 | 0.887 | 0.479 | 2.27E-274 | Macrophage | Hexb        |
| 6.54E-278 | 1.12 | 0.696 | 0.229 | 2.03E-273 | Macrophage | Tgfr1       |
| 3.93E-275 | 1.82 | 0.94  | 0.609 | 1.22E-270 | Macrophage | Dusp1       |
| 4.80E-273 | 1.60 | 0.981 | 0.932 | 1.49E-268 | Macrophage | H3f3b       |
| 4.55E-270 | 1.14 | 0.914 | 0.413 | 1.41E-265 | Macrophage | Sh3bgr3     |
| 2.02E-269 | 1.06 | 0.996 | 0.956 | 6.27E-265 | Macrophage | Rps4x       |
| 4.17E-265 | 0.93 | 0.994 | 0.974 | 1.29E-260 | Macrophage | Rps11       |
| 1.37E-261 | 1.24 | 0.722 | 0.266 | 4.26E-257 | Macrophage | Skil        |
| 2.61E-259 | 1.06 | 0.802 | 0.313 | 8.07E-255 | Macrophage | Arpc1b      |
| 2.27E-258 | 0.96 | 0.994 | 0.964 | 7.03E-254 | Macrophage | Rpl18a      |
| 3.44E-258 | 1.64 | 0.918 | 0.544 | 1.07E-253 | Macrophage | Junb        |
| 1.05E-257 | 1.30 | 0.773 | 0.319 | 3.25E-253 | Macrophage | Kdm6b       |
| 3.06E-251 | 0.90 | 0.996 | 0.974 | 9.48E-247 | Macrophage | Rps12       |
| 6.06E-250 | 0.93 | 0.999 | 0.963 | 1.88E-245 | Macrophage | Rps5        |
| 2.05E-249 | 1.57 | 0.737 | 0.24  | 6.35E-245 | Macrophage | Klf2        |
| 7.83E-244 | 0.84 | 0.997 | 0.977 | 2.42E-239 | Macrophage | Rpl32       |
| 1.98E-242 | 0.79 | 1     | 0.988 | 6.15E-238 | Macrophage | Rplp1       |
| 8.87E-239 | 1.21 | 0.928 | 0.658 | 2.75E-234 | Macrophage | 410006H16Ri |
| 2.57E-238 | 1.15 | 0.904 | 0.583 | 7.95E-234 | Macrophage | Ctsz        |
| 2.74E-237 | 0.90 | 0.996 | 0.959 | 8.48E-233 | Macrophage | Rpl10       |
| 1.05E-235 | 0.90 | 0.989 | 0.946 | 3.27E-231 | Macrophage | Rps13       |
| 1.36E-235 | 1.05 | 1     | 0.964 | 4.23E-231 | Macrophage | Actb        |
| 2.00E-232 | 0.94 | 0.994 | 0.949 | 6.19E-228 | Macrophage | Rpsa        |
| 2.43E-232 | 0.98 | 0.983 | 0.895 | 7.52E-228 | Macrophage | Rpl12       |
| 5.00E-229 | 1.24 | 0.746 | 0.289 | 1.55E-224 | Macrophage | Ppp1r15a    |
| 1.76E-226 | 1.33 | 0.9   | 0.632 | 5.46E-222 | Macrophage | Mcl1        |
| 1.86E-224 | 1.18 | 0.733 | 0.294 | 5.77E-220 | Macrophage | Tsc22d3     |
| 1.08E-222 | 0.76 | 0.999 | 0.972 | 3.35E-218 | Macrophage | Rps16       |
| 1.30E-222 | 0.81 | 0.999 | 0.97  | 4.01E-218 | Macrophage | Rpl39       |
| 1.73E-221 | 1.19 | 0.925 | 0.474 | 5.36E-217 | Macrophage | Btg2        |
| 8.93E-221 | 0.95 | 0.664 | 0.242 | 2.77E-216 | Macrophage | Hexa        |
| 1.96E-219 | 1.27 | 0.917 | 0.551 | 6.07E-215 | Macrophage | Klf6        |
| 3.09E-218 | 2.76 | 0.862 | 0.582 | 9.57E-214 | Macrophage | ApoE        |
| 7.55E-215 | 0.73 | 1     | 0.99  | 2.34E-210 | Macrophage | Rps29       |
| 3.77E-210 | 0.83 | 0.991 | 0.943 | 1.17E-205 | Macrophage | Rpl34       |
| 2.23E-205 | 1.13 | 0.891 | 0.524 | 6.89E-201 | Macrophage | Btg1        |
| 1.37E-204 | 0.85 | 0.951 | 0.684 | 4.26E-200 | Macrophage | Serinc3     |
| 1.37E-200 | 0.74 | 0.999 | 0.976 | 4.24E-196 | Macrophage | Rps14       |
| 8.87E-200 | 1.14 | 0.98  | 0.85  | 2.75E-195 | Macrophage | Jund        |
| 2.07E-199 | 0.76 | 0.996 | 0.975 | 6.41E-195 | Macrophage | Rps27a      |
| 3.05E-194 | 0.96 | 0.681 | 0.286 | 9.45E-190 | Macrophage | Zeb2        |
| 1.14E-191 | 0.65 | 1     | 0.984 | 3.53E-187 | Macrophage | Rpl37a      |
| 1.35E-189 | 1.20 | 0.881 | 0.584 | 4.18E-185 | Macrophage | Zfp36       |

|           |      |       |       |           |            |          |
|-----------|------|-------|-------|-----------|------------|----------|
| 1.91E-188 | 0.62 | 1     | 0.989 | 5.92E-184 | Macrophage | Rpl23    |
| 1.98E-188 | 1.31 | 0.726 | 0.349 | 6.14E-184 | Macrophage | lfrd1    |
| 9.29E-188 | 1.11 | 0.732 | 0.357 | 2.88E-183 | Macrophage | Dleu2    |
| 1.47E-186 | 0.65 | 1     | 0.976 | 4.57E-182 | Macrophage | Rps27    |
| 3.59E-185 | 0.70 | 0.996 | 0.961 | 1.11E-180 | Macrophage | Rplp2    |
| 4.30E-182 | 0.72 | 0.993 | 0.956 | 1.33E-177 | Macrophage | Rpl13    |
| 5.30E-182 | 1.00 | 0.957 | 0.845 | 1.64E-177 | Macrophage | Ctsb     |
| 1.07E-176 | 0.65 | 0.994 | 0.973 | 3.31E-172 | Macrophage | Rpl19    |
| 7.46E-176 | 0.84 | 0.656 | 0.271 | 2.31E-171 | Macrophage | lfng1    |
| 1.01E-175 | 0.65 | 0.993 | 0.965 | 3.14E-171 | Macrophage | Rps18    |
| 1.42E-174 | 0.68 | 0.991 | 0.952 | 4.40E-170 | Macrophage | Rps15a   |
| 4.14E-174 | 0.98 | 0.749 | 0.36  | 1.28E-169 | Macrophage | Iqgap1   |
| 1.52E-172 | 0.91 | 0.862 | 0.586 | 4.71E-168 | Macrophage | Clic1    |
| 2.95E-171 | 0.82 | 0.974 | 0.915 | 9.14E-167 | Macrophage | Rpl3     |
| 2.66E-170 | 0.70 | 0.993 | 0.945 | 8.25E-166 | Macrophage | Rpl17    |
| 9.82E-170 | 1.12 | 0.862 | 0.479 | 3.04E-165 | Macrophage | Egr1     |
| 4.26E-166 | 0.66 | 0.99  | 0.957 | 1.32E-161 | Macrophage | Rps3     |
| 2.52E-164 | 0.77 | 0.892 | 0.634 | 7.81E-160 | Macrophage | Gnai2    |
| 3.13E-164 | 0.94 | 0.765 | 0.472 | 9.69E-160 | Macrophage | Snx5     |
| 3.11E-163 | 0.69 | 0.994 | 0.946 | 9.64E-159 | Macrophage | Rpl21    |
| 2.01E-161 | 0.62 | 0.994 | 0.972 | 6.22E-157 | Macrophage | Rpl11    |
| 3.35E-161 | 0.61 | 0.999 | 0.984 | 1.04E-156 | Macrophage | Eif1     |
| 4.19E-160 | 0.90 | 0.614 | 0.256 | 1.30E-155 | Macrophage | Jpt1     |
| 2.74E-158 | 0.88 | 0.648 | 0.245 | 8.50E-154 | Macrophage | Klf4     |
| 4.79E-156 | 0.62 | 0.986 | 0.954 | 1.48E-151 | Macrophage | Rps23    |
| 7.37E-155 | 0.62 | 0.996 | 0.975 | 2.28E-150 | Macrophage | Rps20    |
| 1.11E-152 | 0.68 | 0.978 | 0.933 | 3.45E-148 | Macrophage | Rack1    |
| 3.14E-152 | 0.96 | 0.911 | 0.783 | 9.72E-148 | Macrophage | H2az1    |
| 3.82E-151 | 0.60 | 0.997 | 0.963 | 1.18E-146 | Macrophage | Rpl9     |
| 4.65E-149 | 0.57 | 0.996 | 0.976 | 1.44E-144 | Macrophage | Rpl26    |
| 4.14E-148 | 0.59 | 0.996 | 0.972 | 1.28E-143 | Macrophage | Rps3a1   |
| 1.60E-147 | 0.69 | 0.968 | 0.901 | 4.94E-143 | Macrophage | Rpl18    |
| 1.33E-146 | 1.05 | 0.712 | 0.423 | 4.12E-142 | Macrophage | lfi30    |
| 1.10E-144 | 0.70 | 0.943 | 0.856 | 3.42E-140 | Macrophage | Rpl27a   |
| 2.54E-143 | 0.55 | 0.996 | 0.985 | 7.86E-139 | Macrophage | Rps21    |
| 4.69E-140 | 0.75 | 0.967 | 0.904 | 1.45E-135 | Macrophage | Ddx5     |
| 1.78E-139 | 0.79 | 0.618 | 0.232 | 5.50E-135 | Macrophage | Gadd45b  |
| 2.34E-136 | 0.56 | 0.607 | 0.231 | 7.25E-132 | Macrophage | Tmsb10   |
| 9.46E-136 | 0.65 | 0.977 | 0.884 | 2.93E-131 | Macrophage | Tmem176b |
| 1.32E-134 | 0.58 | 0.984 | 0.939 | 4.08E-130 | Macrophage | Rpl30    |
| 1.33E-134 | 1.11 | 0.795 | 0.571 | 4.11E-130 | Macrophage | Cebpb    |
| 8.14E-134 | 0.64 | 0.976 | 0.907 | 2.52E-129 | Macrophage | Rps7     |
| 1.56E-133 | 0.91 | 0.634 | 0.272 | 4.82E-129 | Macrophage | Cdkn1a   |
| 1.38E-131 | 1.13 | 0.884 | 0.58  | 4.27E-127 | Macrophage | Fos      |
| 9.07E-131 | 0.80 | 0.74  | 0.479 | 2.81E-126 | Macrophage | Actr3    |
| 3.38E-129 | 1.13 | 0.747 | 0.428 | 1.05E-124 | Macrophage | Ier2     |
| 9.26E-129 | 0.81 | 0.627 | 0.329 | 2.87E-124 | Macrophage | Pold4    |
| 1.85E-128 | 1.00 | 0.758 | 0.501 | 5.73E-124 | Macrophage | Zfp36l2  |
| 5.86E-128 | 0.97 | 0.907 | 0.767 | 1.81E-123 | Macrophage | Hspa5    |
| 7.10E-128 | 0.57 | 1     | 0.997 | 2.20E-123 | Macrophage | Ftl1     |
| 8.12E-128 | 0.61 | 0.986 | 0.946 | 2.52E-123 | Macrophage | Rps26    |
| 8.31E-126 | 0.55 | 0.991 | 0.965 | 2.58E-121 | Macrophage | Rpl6     |
| 1.50E-125 | 0.58 | 0.986 | 0.928 | 4.65E-121 | Macrophage | Rps19    |
| 9.54E-124 | 0.51 | 0.99  | 0.97  | 2.96E-119 | Macrophage | Rpl35a   |
| 1.84E-123 | 1.90 | 0.64  | 0.31  | 5.70E-119 | Macrophage | Hspa1a   |
| 1.26E-120 | 0.86 | 0.729 | 0.373 | 3.91E-116 | Macrophage | Fosb     |
| 3.94E-120 | 0.57 | 0.977 | 0.939 | 1.22E-115 | Macrophage | Rpl22    |
| 7.78E-120 | 0.58 | 0.991 | 0.961 | 2.41E-115 | Macrophage | Rplp0    |
| 3.55E-119 | 0.78 | 0.879 | 0.719 | 1.10E-114 | Macrophage | Pnrc1    |
| 3.84E-118 | 0.60 | 0.961 | 0.913 | 1.19E-113 | Macrophage | Rpl10a   |
| 9.39E-116 | 0.90 | 0.785 | 0.591 | 2.91E-111 | Macrophage | Nfe2l2   |
| 1.51E-111 | 0.61 | 0.94  | 0.858 | 4.68E-107 | Macrophage | Eef1b2   |
| 9.11E-111 | 0.74 | 0.759 | 0.547 | 2.82E-106 | Macrophage | Rap1b    |
| 4.80E-109 | 0.77 | 0.736 | 0.529 | 1.49E-104 | Macrophage | Man2b1   |

|           |      |       |       |           |                                       |          |
|-----------|------|-------|-------|-----------|---------------------------------------|----------|
| 1.50E-107 | 0.64 | 0.857 | 0.734 | 4.66E-103 | Macrophage                            | Cdc42    |
| 1.07E-105 | 0.65 | 0.9   | 0.797 | 3.30E-101 | Macrophage                            | Cfl1     |
| 2.18E-105 | 0.51 | 0.977 | 0.937 | 6.74E-101 | Macrophage                            | Rps28    |
| 4.29E-105 | 0.62 | 0.838 | 0.715 | 1.33E-100 | Macrophage                            | Arpc3    |
| 9.96E-104 | 0.74 | 0.73  | 0.489 | 3.09E-99  | Macrophage                            | Ccn11    |
| 1.96E-103 | 0.61 | 0.907 | 0.81  | 6.08E-99  | Macrophage                            | Calm1    |
| 4.83E-103 | 0.64 | 0.857 | 0.745 | 1.50E-98  | Macrophage                            | Eif3f    |
| 3.67E-101 | 0.52 | 0.964 | 0.919 | 1.14E-96  | Macrophage                            | Rpl29    |
| 1.19E-100 | 0.71 | 0.608 | 0.33  | 3.69E-96  | Macrophage                            | H2-T23   |
| 1.16E-99  | 0.79 | 0.974 | 0.976 | 3.59E-95  | Macrophage                            | Ubc      |
| 3.74E-97  | 0.53 | 0.935 | 0.878 | 1.16E-92  | Macrophage                            | Cd81     |
| 5.69E-95  | 0.67 | 0.749 | 0.54  | 1.76E-90  | Macrophage                            | Rtn4     |
| 3.64E-87  | 0.81 | 0.692 | 0.513 | 1.13E-82  | Macrophage                            | Sdcbp    |
| 2.22E-86  | 0.54 | 0.869 | 0.757 | 6.89E-82  | Macrophage                            | Arpc2    |
| 2.76E-86  | 0.98 | 0.669 | 0.41  | 8.56E-82  | Macrophage                            | Rhob     |
| 1.48E-85  | 0.62 | 0.783 | 0.636 | 4.58E-81  | Macrophage                            | Ctsa     |
| 1.15E-81  | 0.62 | 0.758 | 0.62  | 3.56E-77  | Macrophage                            | Picalm   |
| 3.44E-78  | 0.69 | 0.742 | 0.582 | 1.07E-73  | Macrophage                            | Zfand5   |
| 1.97E-77  | 0.83 | 0.656 | 0.462 | 6.11E-73  | Macrophage                            | Hmgb2    |
| 9.64E-77  | 0.59 | 0.674 | 0.426 | 2.99E-72  | Macrophage                            | Anxa5    |
| 1.12E-76  | 0.60 | 0.657 | 0.443 | 3.48E-72  | Macrophage                            | Tpm3     |
| 6.09E-75  | 0.58 | 0.74  | 0.621 | 1.89E-70  | Macrophage                            | Erp29    |
| 2.72E-72  | 0.51 | 0.888 | 0.82  | 8.42E-68  | Macrophage                            | Cita     |
| 5.43E-68  | 0.84 | 0.758 | 0.619 | 1.68E-63  | Macrophage                            | Cited2   |
| 3.93E-66  | 0.57 | 0.752 | 0.664 | 1.22E-61  | Macrophage                            | Rrbp1    |
| 5.62E-65  | 0.90 | 0.895 | 0.771 | 1.74E-60  | Macrophage                            | Jun      |
| 1.12E-61  | 0.65 | 0.818 | 0.769 | 3.45E-57  | Macrophage                            | Sqstm1   |
| 2.41E-60  | 0.54 | 0.846 | 0.816 | 7.48E-56  | Macrophage                            | Eif4a1   |
| 5.07E-59  | 0.51 | 0.716 | 0.55  | 1.57E-54  | Macrophage                            | Cotl1    |
| 1.01E-55  | 0.55 | 0.66  | 0.538 | 3.12E-51  | Macrophage                            | Tpd52    |
| 5.43E-52  | 0.52 | 0.648 | 0.516 | 1.68E-47  | Macrophage                            | Atp2b1   |
| 9.07E-52  | 0.55 | 0.878 | 0.74  | 2.81E-47  | Macrophage                            | Neat1    |
| 1.67E-42  | 0.57 | 0.875 | 0.826 | 5.17E-38  | Macrophage                            | Sat1     |
| 5.05E-33  | 0.82 | 0.865 | 0.879 | 1.56E-28  | Macrophage                            | Hsp90aa1 |
| 1.73E-09  | 0.59 | 0.686 | 0.753 | 5.36E-05  | Macrophage                            | Dnaja1   |
| 0.00E+00  | 3.24 | 0.98  | 0.058 | 0.00E+00  | Intercalating cell of collecting duct | Atp6v1g3 |
| 0.00E+00  | 2.51 | 0.746 | 0.061 | 0.00E+00  | Intercalating cell of collecting duct | Hsd11b2  |
| 0.00E+00  | 2.02 | 0.927 | 0.029 | 0.00E+00  | Intercalating cell of collecting duct | Slc4a9   |
| 0.00E+00  | 1.90 | 0.693 | 0.009 | 0.00E+00  | Intercalating cell of collecting duct | Aqp6     |
| 0.00E+00  | 1.87 | 0.822 | 0.043 | 0.00E+00  | Intercalating cell of collecting duct | Cldn4    |
| 0.00E+00  | 1.82 | 0.613 | 0.04  | 0.00E+00  | Intercalating cell of collecting duct | Aqp2     |
| 0.00E+00  | 1.78 | 0.958 | 0.261 | 0.00E+00  | Intercalating cell of collecting duct | Tmem213  |
| 0.00E+00  | 1.77 | 0.899 | 0.007 | 0.00E+00  | Intercalating cell of collecting duct | Foxi1    |
| 0.00E+00  | 1.76 | 0.874 | 0.169 | 0.00E+00  | Intercalating cell of collecting duct | Trib1    |
| 0.00E+00  | 1.73 | 0.93  | 0.018 | 0.00E+00  | Intercalating cell of collecting duct | Atp6v0d2 |
| 0.00E+00  | 1.71 | 0.94  | 0.355 | 0.00E+00  | Intercalating cell of collecting duct | Pam      |
| 0.00E+00  | 1.68 | 0.884 | 0.036 | 0.00E+00  | Intercalating cell of collecting duct | Rhbg     |
| 0.00E+00  | 1.64 | 0.837 | 0.181 | 0.00E+00  | Intercalating cell of collecting duct | Aqp3     |
| 0.00E+00  | 1.63 | 0.917 | 0.071 | 0.00E+00  | Intercalating cell of collecting duct | Rhcg     |
| 0.00E+00  | 1.63 | 0.985 | 0.761 | 0.00E+00  | Intercalating cell of collecting duct | Atp6v1a  |
| 0.00E+00  | 1.57 | 0.862 | 0.02  | 0.00E+00  | Intercalating cell of collecting duct | Atp6v1c2 |
| 0.00E+00  | 1.54 | 0.967 | 0.608 | 0.00E+00  | Intercalating cell of collecting duct | Tfcp2l1  |
| 0.00E+00  | 1.50 | 0.804 | 0.026 | 0.00E+00  | Intercalating cell of collecting duct | Spink8   |
| 0.00E+00  | 1.50 | 0.86  | 0.224 | 0.00E+00  | Intercalating cell of collecting duct | Clu      |
| 0.00E+00  | 1.42 | 0.849 | 0.224 | 0.00E+00  | Intercalating cell of collecting duct | Cebpd    |
| 0.00E+00  | 1.39 | 0.636 | 0.005 | 0.00E+00  | Intercalating cell of collecting duct | Slc4a1   |
| 0.00E+00  | 1.37 | 0.749 | 0.101 | 0.00E+00  | Intercalating cell of collecting duct | Slc8a1   |
| 0.00E+00  | 1.35 | 0.94  | 0.205 | 0.00E+00  | Intercalating cell of collecting duct | Clnkb    |
| 0.00E+00  | 1.30 | 0.817 | 0.078 | 0.00E+00  | Intercalating cell of collecting duct | Krt18    |
| 0.00E+00  | 1.30 | 0.89  | 0.128 | 0.00E+00  | Intercalating cell of collecting duct | Cldn8    |
| 0.00E+00  | 1.30 | 0.92  | 0.175 | 0.00E+00  | Intercalating cell of collecting duct | Scnn1a   |
| 0.00E+00  | 1.29 | 0.899 | 0.339 | 0.00E+00  | Intercalating cell of collecting duct | Car12    |
| 0.00E+00  | 1.29 | 0.892 | 0.127 | 0.00E+00  | Intercalating cell of collecting duct | Cldn7    |
| 0.00E+00  | 1.28 | 0.927 | 0.239 | 0.00E+00  | Intercalating cell of collecting duct | Ehfd1    |

|          |      |       |       |          |                                       |           |
|----------|------|-------|-------|----------|---------------------------------------|-----------|
| 0.00E+00 | 1.28 | 0.832 | 0.198 | 0.00E+00 | Intercalating cell of collecting duct | Tmem52b   |
| 0.00E+00 | 1.28 | 0.708 | 0.103 | 0.00E+00 | Intercalating cell of collecting duct | Tacstd2   |
| 0.00E+00 | 1.26 | 0.953 | 0.313 | 0.00E+00 | Intercalating cell of collecting duct | Mal       |
| 0.00E+00 | 1.26 | 0.925 | 0.291 | 0.00E+00 | Intercalating cell of collecting duct | Aif1l     |
| 0.00E+00 | 1.26 | 0.784 | 0.042 | 0.00E+00 | Intercalating cell of collecting duct | Scnn1b    |
| 0.00E+00 | 1.25 | 0.689 | 0.109 | 0.00E+00 | Intercalating cell of collecting duct | Gm44120   |
| 0.00E+00 | 1.25 | 0.819 | 0.063 | 0.00E+00 | Intercalating cell of collecting duct | Plet1     |
| 0.00E+00 | 1.22 | 0.797 | 0.032 | 0.00E+00 | Intercalating cell of collecting duct | Oxgr1     |
| 0.00E+00 | 1.20 | 0.864 | 0.09  | 0.00E+00 | Intercalating cell of collecting duct | Atp6v1b1  |
| 0.00E+00 | 1.20 | 0.817 | 0.164 | 0.00E+00 | Intercalating cell of collecting duct | Nr4a1     |
| 0.00E+00 | 1.18 | 0.817 | 0.032 | 0.00E+00 | Intercalating cell of collecting duct | Serpinb6b |
| 0.00E+00 | 1.18 | 0.799 | 0.1   | 0.00E+00 | Intercalating cell of collecting duct | Scd2      |
| 0.00E+00 | 1.18 | 0.744 | 0.121 | 0.00E+00 | Intercalating cell of collecting duct | Maff      |
| 0.00E+00 | 1.13 | 0.885 | 0.278 | 0.00E+00 | Intercalating cell of collecting duct | Cdh1      |
| 0.00E+00 | 1.10 | 0.822 | 0.182 | 0.00E+00 | Intercalating cell of collecting duct | Lgals3    |
| 0.00E+00 | 1.10 | 0.782 | 0.048 | 0.00E+00 | Intercalating cell of collecting duct | Ociad2    |
| 0.00E+00 | 1.10 | 0.922 | 0.208 | 0.00E+00 | Intercalating cell of collecting duct | Epcam     |
| 0.00E+00 | 1.09 | 0.882 | 0.279 | 0.00E+00 | Intercalating cell of collecting duct | Anxa4     |
| 0.00E+00 | 1.07 | 0.832 | 0.15  | 0.00E+00 | Intercalating cell of collecting duct | Csrp1     |
| 0.00E+00 | 1.07 | 0.751 | 0.101 | 0.00E+00 | Intercalating cell of collecting duct | Phlda1    |
| 0.00E+00 | 1.07 | 0.899 | 0.338 | 0.00E+00 | Intercalating cell of collecting duct | Itpr2     |
| 0.00E+00 | 1.02 | 0.741 | 0.009 | 0.00E+00 | Intercalating cell of collecting duct | Hepacam2  |
| 0.00E+00 | 1.00 | 0.889 | 0.192 | 0.00E+00 | Intercalating cell of collecting duct | Krt7      |
| 0.00E+00 | 0.99 | 0.663 | 0.025 | 0.00E+00 | Intercalating cell of collecting duct | Scnn1g    |
| 0.00E+00 | 0.98 | 0.781 | 0.052 | 0.00E+00 | Intercalating cell of collecting duct | Gata3     |
| 0.00E+00 | 0.97 | 0.766 | 0.03  | 0.00E+00 | Intercalating cell of collecting duct | Tmem117   |
| 0.00E+00 | 0.96 | 0.791 | 0.077 | 0.00E+00 | Intercalating cell of collecting duct | Blnk      |
| 0.00E+00 | 0.95 | 0.787 | 0.179 | 0.00E+00 | Intercalating cell of collecting duct | Cxadr     |
| 0.00E+00 | 0.94 | 0.714 | 0.037 | 0.00E+00 | Intercalating cell of collecting duct | Ptges     |
| 0.00E+00 | 0.94 | 0.794 | 0.12  | 0.00E+00 | Intercalating cell of collecting duct | Ckmt1     |
| 0.00E+00 | 0.92 | 0.709 | 0.044 | 0.00E+00 | Intercalating cell of collecting duct | Olfm1     |
| 0.00E+00 | 0.92 | 0.741 | 0.077 | 0.00E+00 | Intercalating cell of collecting duct | Mal2      |
| 0.00E+00 | 0.92 | 0.867 | 0.289 | 0.00E+00 | Intercalating cell of collecting duct | Col18a1   |
| 0.00E+00 | 0.92 | 0.628 | 0.011 | 0.00E+00 | Intercalating cell of collecting duct | Kit       |
| 0.00E+00 | 0.91 | 0.704 | 0.016 | 0.00E+00 | Intercalating cell of collecting duct | Rhou      |
| 0.00E+00 | 0.90 | 0.698 | 0.135 | 0.00E+00 | Intercalating cell of collecting duct | Emb       |
| 0.00E+00 | 0.88 | 0.744 | 0.053 | 0.00E+00 | Intercalating cell of collecting duct | Serpinb9  |
| 0.00E+00 | 0.87 | 0.841 | 0.262 | 0.00E+00 | Intercalating cell of collecting duct | Rnf152    |
| 0.00E+00 | 0.86 | 0.734 | 0.093 | 0.00E+00 | Intercalating cell of collecting duct | Foxq1     |
| 0.00E+00 | 0.85 | 0.807 | 0.151 | 0.00E+00 | Intercalating cell of collecting duct | Tmem50b   |
| 0.00E+00 | 0.85 | 0.814 | 0.106 | 0.00E+00 | Intercalating cell of collecting duct | St14      |
| 0.00E+00 | 0.85 | 0.693 | 0.09  | 0.00E+00 | Intercalating cell of collecting duct | Adgrf5    |
| 0.00E+00 | 0.84 | 0.719 | 0.112 | 0.00E+00 | Intercalating cell of collecting duct | Elf3      |
| 0.00E+00 | 0.84 | 0.731 | 0.028 | 0.00E+00 | Intercalating cell of collecting duct | Rcan2     |
| 0.00E+00 | 0.84 | 0.744 | 0.084 | 0.00E+00 | Intercalating cell of collecting duct | Cav2      |
| 0.00E+00 | 0.83 | 0.767 | 0.16  | 0.00E+00 | Intercalating cell of collecting duct | C77080    |
| 0.00E+00 | 0.82 | 0.703 | 0.069 | 0.00E+00 | Intercalating cell of collecting duct | Slc35g1   |
| 0.00E+00 | 0.82 | 0.625 | 0.015 | 0.00E+00 | Intercalating cell of collecting duct | Maird1    |
| 0.00E+00 | 0.82 | 0.779 | 0.122 | 0.00E+00 | Intercalating cell of collecting duct | Casz1     |
| 0.00E+00 | 0.80 | 0.826 | 0.176 | 0.00E+00 | Intercalating cell of collecting duct | Mecom     |
| 0.00E+00 | 0.80 | 0.716 | 0.154 | 0.00E+00 | Intercalating cell of collecting duct | Tdrp      |
| 0.00E+00 | 0.79 | 0.65  | 0.056 | 0.00E+00 | Intercalating cell of collecting duct | Gata2     |
| 0.00E+00 | 0.79 | 0.673 | 0.05  | 0.00E+00 | Intercalating cell of collecting duct | Sptbn2    |
| 0.00E+00 | 0.78 | 0.719 | 0.105 | 0.00E+00 | Intercalating cell of collecting duct | Sowahc    |
| 0.00E+00 | 0.76 | 0.653 | 0.06  | 0.00E+00 | Intercalating cell of collecting duct | Ehf       |
| 0.00E+00 | 0.76 | 0.784 | 0.199 | 0.00E+00 | Intercalating cell of collecting duct | Cpeb2     |
| 0.00E+00 | 0.75 | 0.719 | 0.105 | 0.00E+00 | Intercalating cell of collecting duct | Alcam     |
| 0.00E+00 | 0.74 | 0.746 | 0.114 | 0.00E+00 | Intercalating cell of collecting duct | Smim5     |
| 0.00E+00 | 0.74 | 0.842 | 0.184 | 0.00E+00 | Intercalating cell of collecting duct | Slc16a7   |
| 0.00E+00 | 0.72 | 0.603 | 0.018 | 0.00E+00 | Intercalating cell of collecting duct | Tmem61    |
| 0.00E+00 | 0.71 | 0.65  | 0.006 | 0.00E+00 | Intercalating cell of collecting duct | Avpr1a    |
| 0.00E+00 | 0.71 | 0.646 | 0.002 | 0.00E+00 | Intercalating cell of collecting duct | Klkb1     |
| 0.00E+00 | 0.70 | 0.781 | 0.151 | 0.00E+00 | Intercalating cell of collecting duct | Cds1      |
| 0.00E+00 | 0.70 | 0.716 | 0.115 | 0.00E+00 | Intercalating cell of collecting duct | Tspan1    |

|           |      |       |       |           |                                       |          |
|-----------|------|-------|-------|-----------|---------------------------------------|----------|
| 0.00E+00  | 0.70 | 0.661 | 0.036 | 0.00E+00  | Intercalating cell of collecting duct | Plcg2    |
| 0.00E+00  | 0.68 | 0.724 | 0.071 | 0.00E+00  | Intercalating cell of collecting duct | Kcnq1    |
| 0.00E+00  | 0.67 | 0.729 | 0.161 | 0.00E+00  | Intercalating cell of collecting duct | Ermp1    |
| 0.00E+00  | 0.67 | 0.646 | 0.113 | 0.00E+00  | Intercalating cell of collecting duct | Kcnj10   |
| 0.00E+00  | 0.65 | 0.625 | 0.016 | 0.00E+00  | Intercalating cell of collecting duct | Syn2     |
| 0.00E+00  | 0.65 | 0.716 | 0.095 | 0.00E+00  | Intercalating cell of collecting duct | Etl4     |
| 0.00E+00  | 0.63 | 0.618 | 0.089 | 0.00E+00  | Intercalating cell of collecting duct | Thbs1    |
| 0.00E+00  | 0.63 | 0.762 | 0.181 | 0.00E+00  | Intercalating cell of collecting duct | Twsg1    |
| 0.00E+00  | 0.63 | 0.623 | 0.059 | 0.00E+00  | Intercalating cell of collecting duct | Dsp      |
| 0.00E+00  | 0.63 | 0.661 | 0.054 | 0.00E+00  | Intercalating cell of collecting duct | Muc1     |
| 0.00E+00  | 0.60 | 0.606 | 0.015 | 0.00E+00  | Intercalating cell of collecting duct | Parm1    |
| 0.00E+00  | 0.60 | 0.688 | 0.132 | 0.00E+00  | Intercalating cell of collecting duct | Abr      |
| 0.00E+00  | 0.58 | 0.663 | 0.094 | 0.00E+00  | Intercalating cell of collecting duct | Bsnd     |
| 0.00E+00  | 0.58 | 0.658 | 0.083 | 0.00E+00  | Intercalating cell of collecting duct | Sort1    |
| 0.00E+00  | 0.56 | 0.734 | 0.12  | 0.00E+00  | Intercalating cell of collecting duct | Zfhx3    |
| 0.00E+00  | 0.56 | 0.676 | 0.117 | 0.00E+00  | Intercalating cell of collecting duct | Slit2    |
| 0.00E+00  | 0.56 | 0.603 | 0.09  | 0.00E+00  | Intercalating cell of collecting duct | Serp1b1a |
| 0.00E+00  | 0.50 | 0.618 | 0.092 | 0.00E+00  | Intercalating cell of collecting duct | Mfsd6    |
| 4.21E-307 | 0.64 | 0.699 | 0.15  | 1.30E-302 | Intercalating cell of collecting duct | Slc2a1   |
| 7.52E-303 | 0.84 | 0.869 | 0.261 | 2.33E-298 | Intercalating cell of collecting duct | Pde1a    |
| 1.62E-301 | 1.51 | 0.927 | 0.369 | 5.01E-297 | Intercalating cell of collecting duct | Defb1    |
| 8.96E-300 | 0.75 | 0.669 | 0.133 | 2.77E-295 | Intercalating cell of collecting duct | Gstm2    |
| 1.78E-296 | 0.99 | 0.887 | 0.346 | 5.53E-292 | Intercalating cell of collecting duct | Tmprss2  |
| 2.04E-296 | 0.86 | 0.857 | 0.3   | 6.31E-292 | Intercalating cell of collecting duct | Rragd    |
| 1.10E-295 | 0.64 | 0.663 | 0.147 | 3.41E-291 | Intercalating cell of collecting duct | Khl21    |
| 1.63E-291 | 0.67 | 0.696 | 0.14  | 5.05E-287 | Intercalating cell of collecting duct | Pgam2    |
| 3.80E-288 | 1.35 | 0.973 | 0.644 | 1.18E-283 | Intercalating cell of collecting duct | Car2     |
| 1.35E-286 | 0.83 | 0.854 | 0.281 | 4.18E-282 | Intercalating cell of collecting duct | Foxp1    |
| 2.89E-283 | 0.64 | 0.787 | 0.196 | 8.96E-279 | Intercalating cell of collecting duct | Rap1gap  |
| 1.56E-280 | 1.40 | 0.887 | 0.318 | 4.82E-276 | Intercalating cell of collecting duct | Atf3     |
| 2.28E-279 | 0.82 | 0.781 | 0.204 | 7.07E-275 | Intercalating cell of collecting duct | Sox4     |
| 2.34E-279 | 0.57 | 0.794 | 0.183 | 7.24E-275 | Intercalating cell of collecting duct | Hk1      |
| 9.74E-275 | 0.78 | 0.761 | 0.216 | 3.02E-270 | Intercalating cell of collecting duct | Map3k1   |
| 1.23E-272 | 0.68 | 0.804 | 0.23  | 3.81E-268 | Intercalating cell of collecting duct | Acs15    |
| 4.01E-270 | 1.08 | 0.922 | 0.485 | 1.24E-265 | Intercalating cell of collecting duct | Atp6ap2  |
| 7.18E-268 | 0.83 | 0.811 | 0.292 | 2.22E-263 | Intercalating cell of collecting duct | Nedd4l   |
| 3.81E-265 | 0.91 | 0.819 | 0.229 | 1.18E-260 | Intercalating cell of collecting duct | Gadd45b  |
| 1.82E-264 | 1.16 | 0.94  | 0.631 | 5.65E-260 | Intercalating cell of collecting duct | Pgrmc1   |
| 3.82E-262 | 0.54 | 0.703 | 0.165 | 1.18E-257 | Intercalating cell of collecting duct | Akr1c19  |
| 5.38E-261 | 0.63 | 0.688 | 0.167 | 1.67E-256 | Intercalating cell of collecting duct | Hoxb9    |
| 3.34E-259 | 0.76 | 0.869 | 0.277 | 1.03E-254 | Intercalating cell of collecting duct | Hoxd8    |
| 1.31E-258 | 1.31 | 0.932 | 0.415 | 4.06E-254 | Intercalating cell of collecting duct | Sh3bgrl3 |
| 1.96E-257 | 0.66 | 0.797 | 0.244 | 6.07E-253 | Intercalating cell of collecting duct | Bag4     |
| 4.99E-257 | 1.01 | 0.97  | 0.784 | 1.54E-252 | Intercalating cell of collecting duct | Atp6v0e  |
| 1.11E-255 | 1.58 | 0.935 | 0.551 | 3.44E-251 | Intercalating cell of collecting duct | Klf6     |
| 4.14E-254 | 0.55 | 0.724 | 0.182 | 1.28E-249 | Intercalating cell of collecting duct | Hoxd9    |
| 2.28E-251 | 0.83 | 0.726 | 0.201 | 7.07E-247 | Intercalating cell of collecting duct | Csrnp1   |
| 3.72E-251 | 0.62 | 0.669 | 0.173 | 1.15E-246 | Intercalating cell of collecting duct | Fbxo33   |
| 4.79E-251 | 1.35 | 0.955 | 0.475 | 1.48E-246 | Intercalating cell of collecting duct | Btg2     |
| 7.72E-251 | 0.57 | 0.603 | 0.132 | 2.39E-246 | Intercalating cell of collecting duct | Prss23   |
| 1.81E-248 | 0.58 | 0.684 | 0.161 | 5.62E-244 | Intercalating cell of collecting duct | Arl4d    |
| 1.90E-248 | 0.76 | 0.749 | 0.24  | 5.89E-244 | Intercalating cell of collecting duct | Trak1    |
| 2.28E-246 | 1.54 | 0.917 | 0.479 | 7.06E-242 | Intercalating cell of collecting duct | Egr1     |
| 1.12E-241 | 0.60 | 0.752 | 0.199 | 3.47E-237 | Intercalating cell of collecting duct | Tspan8   |
| 1.31E-241 | 0.67 | 0.771 | 0.227 | 4.05E-237 | Intercalating cell of collecting duct | Calb1    |
| 2.15E-241 | 0.67 | 0.774 | 0.222 | 6.67E-237 | Intercalating cell of collecting duct | Pou3f3   |
| 1.81E-239 | 1.07 | 0.616 | 0.153 | 5.61E-235 | Intercalating cell of collecting duct | Gm43305  |
| 4.02E-239 | 0.93 | 0.875 | 0.359 | 1.24E-234 | Intercalating cell of collecting duct | Iqgap1   |
| 1.78E-237 | 0.95 | 0.987 | 0.835 | 5.51E-233 | Intercalating cell of collecting duct | Atp6v1e1 |
| 6.74E-237 | 0.79 | 0.656 | 0.177 | 2.09E-232 | Intercalating cell of collecting duct | Tbck     |
| 3.41E-236 | 0.93 | 0.786 | 0.279 | 1.06E-231 | Intercalating cell of collecting duct | Irs2     |
| 6.66E-236 | 0.88 | 0.917 | 0.377 | 2.06E-231 | Intercalating cell of collecting duct | Cd9      |
| 2.20E-234 | 0.79 | 0.997 | 0.99  | 6.81E-230 | Intercalating cell of collecting duct | Iitm2b   |
| 3.07E-233 | 0.78 | 0.834 | 0.288 | 9.50E-229 | Intercalating cell of collecting duct | Ppp1r15a |



|           |      |       |       |           |                                       |           |
|-----------|------|-------|-------|-----------|---------------------------------------|-----------|
| 5.73E-233 | 0.70 | 0.666 | 0.164 | 1.77E-228 | Intercalating cell of collecting duct | Irf1      |
| 6.47E-231 | 0.69 | 0.769 | 0.24  | 2.00E-226 | Intercalating cell of collecting duct | Litaf     |
| 1.64E-230 | 0.69 | 0.718 | 0.217 | 5.09E-226 | Intercalating cell of collecting duct | Cish      |
| 5.04E-228 | 0.70 | 0.821 | 0.293 | 1.56E-223 | Intercalating cell of collecting duct | Tanc1     |
| 1.93E-227 | 0.86 | 0.854 | 0.359 | 5.98E-223 | Intercalating cell of collecting duct | Pmepa1    |
| 4.96E-226 | 0.98 | 0.894 | 0.461 | 1.54E-221 | Intercalating cell of collecting duct | Eps8      |
| 1.00E-225 | 0.89 | 0.9   | 0.469 | 3.11E-221 | Intercalating cell of collecting duct | Itgav     |
| 1.45E-225 | 1.15 | 0.967 | 0.685 | 4.49E-221 | Intercalating cell of collecting duct | Serinc3   |
| 2.06E-225 | 0.69 | 0.786 | 0.254 | 6.38E-221 | Intercalating cell of collecting duct | Cdkl1     |
| 1.24E-221 | 1.21 | 0.864 | 0.371 | 3.84E-217 | Intercalating cell of collecting duct | Fosb      |
| 4.91E-219 | 0.71 | 0.839 | 0.326 | 1.52E-214 | Intercalating cell of collecting duct | Pbxip1    |
| 7.24E-219 | 0.75 | 0.86  | 0.331 | 2.24E-214 | Intercalating cell of collecting duct | Gadd45a   |
| 6.79E-217 | 0.99 | 0.915 | 0.513 | 2.10E-212 | Intercalating cell of collecting duct | Adgrg1    |
| 3.70E-215 | 0.68 | 0.684 | 0.208 | 1.15E-210 | Intercalating cell of collecting duct | Pard6b    |
| 1.60E-214 | 0.89 | 0.703 | 0.214 | 4.96E-210 | Intercalating cell of collecting duct | Rnd3      |
| 4.85E-214 | 0.54 | 0.646 | 0.164 | 1.50E-209 | Intercalating cell of collecting duct | Sbno2     |
| 3.21E-213 | 0.53 | 0.676 | 0.199 | 9.93E-209 | Intercalating cell of collecting duct | Ptprij    |
| 1.36E-211 | 0.87 | 0.884 | 0.479 | 4.20E-207 | Intercalating cell of collecting duct | Atp6ap1   |
| 7.75E-211 | 0.94 | 0.949 | 0.718 | 2.40E-206 | Intercalating cell of collecting duct | Aplp2     |
| 1.60E-210 | 0.81 | 0.882 | 0.443 | 4.94E-206 | Intercalating cell of collecting duct | Ptbp3     |
| 1.06E-208 | 1.51 | 0.904 | 0.532 | 3.29E-204 | Intercalating cell of collecting duct | Chka      |
| 2.02E-208 | 0.73 | 0.919 | 0.341 | 6.25E-204 | Intercalating cell of collecting duct | Pkm       |
| 7.18E-208 | 1.36 | 0.93  | 0.58  | 2.22E-203 | Intercalating cell of collecting duct | Fos       |
| 7.68E-208 | 0.97 | 0.897 | 0.407 | 2.38E-203 | Intercalating cell of collecting duct | Ier3      |
| 2.61E-204 | 1.15 | 0.89  | 0.48  | 8.08E-200 | Intercalating cell of collecting duct | Hexb      |
| 5.15E-204 | 0.79 | 0.824 | 0.363 | 1.59E-199 | Intercalating cell of collecting duct | Lsm6      |
| 1.17E-202 | 1.11 | 0.807 | 0.348 | 3.64E-198 | Intercalating cell of collecting duct | Ifrd1     |
| 1.72E-202 | 0.59 | 0.728 | 0.237 | 5.33E-198 | Intercalating cell of collecting duct | Snhg4     |
| 2.93E-199 | 0.53 | 0.749 | 0.241 | 9.07E-195 | Intercalating cell of collecting duct | Laptm4b   |
| 1.11E-198 | 0.54 | 0.641 | 0.184 | 3.43E-194 | Intercalating cell of collecting duct | Mafk      |
| 3.97E-198 | 0.62 | 0.772 | 0.275 | 1.23E-193 | Intercalating cell of collecting duct | Trim2     |
| 3.32E-196 | 0.81 | 0.914 | 0.585 | 1.03E-191 | Intercalating cell of collecting duct | Atp6v1d   |
| 7.59E-196 | 0.91 | 0.99  | 0.9   | 2.35E-191 | Intercalating cell of collecting duct | Atp1b1    |
| 1.39E-195 | 0.82 | 0.846 | 0.388 | 4.30E-191 | Intercalating cell of collecting duct | Cicn5     |
| 1.50E-194 | 0.92 | 0.887 | 0.369 | 4.66E-190 | Intercalating cell of collecting duct | Wfdc2     |
| 1.27E-193 | 0.88 | 0.99  | 0.941 | 3.94E-189 | Intercalating cell of collecting duct | Atp6v0c   |
| 2.62E-193 | 0.53 | 0.661 | 0.2   | 8.12E-189 | Intercalating cell of collecting duct | Rela      |
| 4.88E-192 | 0.56 | 0.718 | 0.238 | 1.51E-187 | Intercalating cell of collecting duct | Tbx2      |
| 3.82E-191 | 1.01 | 0.842 | 0.413 | 1.18E-186 | Intercalating cell of collecting duct | Bhlhe40   |
| 1.26E-190 | 0.81 | 0.924 | 0.616 | 3.90E-186 | Intercalating cell of collecting duct | Glc       |
| 1.48E-190 | 0.56 | 0.744 | 0.266 | 4.58E-186 | Intercalating cell of collecting duct | Cistn1    |
| 2.09E-190 | 0.72 | 0.784 | 0.321 | 6.48E-186 | Intercalating cell of collecting duct | Map3k2    |
| 2.51E-188 | 0.52 | 0.733 | 0.229 | 7.77E-184 | Intercalating cell of collecting duct | Cd82      |
| 3.49E-188 | 0.74 | 0.787 | 0.32  | 1.08E-183 | Intercalating cell of collecting duct | Pdcd4     |
| 1.03E-187 | 1.00 | 0.949 | 0.647 | 3.20E-183 | Intercalating cell of collecting duct | Aldh11l1  |
| 2.77E-187 | 0.79 | 0.821 | 0.374 | 8.57E-183 | Intercalating cell of collecting duct | Stat3     |
| 5.58E-187 | 0.60 | 0.844 | 0.309 | 1.73E-182 | Intercalating cell of collecting duct | Hes1      |
| 1.34E-186 | 0.71 | 0.975 | 0.888 | 4.15E-182 | Intercalating cell of collecting duct | Atp6v1f   |
| 2.51E-186 | 0.96 | 0.673 | 0.235 | 7.78E-182 | Intercalating cell of collecting duct | Mme       |
| 5.34E-186 | 0.80 | 0.885 | 0.464 | 1.65E-181 | Intercalating cell of collecting duct | Ppargc1a  |
| 7.05E-186 | 0.75 | 0.824 | 0.396 | 2.18E-181 | Intercalating cell of collecting duct | Dmxl1     |
| 5.13E-185 | 0.60 | 0.786 | 0.274 | 1.59E-180 | Intercalating cell of collecting duct | Tacc1     |
| 3.42E-184 | 1.29 | 0.89  | 0.585 | 1.06E-179 | Intercalating cell of collecting duct | Zfp36     |
| 1.26E-183 | 0.90 | 0.947 | 0.737 | 3.90E-179 | Intercalating cell of collecting duct | Cdh16     |
| 3.64E-182 | 0.85 | 0.757 | 0.311 | 1.13E-177 | Intercalating cell of collecting duct | Cdo1      |
| 1.79E-181 | 0.68 | 0.834 | 0.414 | 5.54E-177 | Intercalating cell of collecting duct | Atp6v1h   |
| 2.92E-181 | 1.18 | 0.927 | 0.649 | 9.05E-177 | Intercalating cell of collecting duct | Nudt4     |
| 1.02E-180 | 0.83 | 0.922 | 0.634 | 3.17E-176 | Intercalating cell of collecting duct | Atp6v0a4  |
| 2.21E-180 | 0.80 | 0.995 | 0.962 | 6.84E-176 | Intercalating cell of collecting duct | Actg1     |
| 7.08E-180 | 0.60 | 0.741 | 0.265 | 2.19E-175 | Intercalating cell of collecting duct | Tuba1c    |
| 8.65E-179 | 0.84 | 0.957 | 0.809 | 2.68E-174 | Intercalating cell of collecting duct | Sdc4      |
| 8.11E-178 | 0.67 | 0.862 | 0.458 | 2.51E-173 | Intercalating cell of collecting duct | Mindy2    |
| 1.27E-175 | 0.74 | 0.937 | 0.665 | 3.94E-171 | Intercalating cell of collecting duct | Camk2n1   |
| 1.31E-175 | 0.56 | 0.749 | 0.297 | 4.07E-171 | Intercalating cell of collecting duct | Trp53inp2 |

|           |      |       |       |           |                                       |          |
|-----------|------|-------|-------|-----------|---------------------------------------|----------|
| 2.47E-175 | 0.68 | 0.86  | 0.41  | 7.65E-171 | Intercalating cell of collecting duct | Nfe2l1   |
| 2.90E-175 | 0.53 | 0.757 | 0.294 | 8.97E-171 | Intercalating cell of collecting duct | Slc25a23 |
| 4.51E-175 | 0.91 | 0.925 | 0.546 | 1.40E-170 | Intercalating cell of collecting duct | Junb     |
| 2.62E-174 | 0.59 | 0.611 | 0.161 | 8.11E-170 | Intercalating cell of collecting duct | Pcolce   |
| 1.11E-171 | 0.73 | 0.915 | 0.525 | 3.45E-167 | Intercalating cell of collecting duct | Btg1     |
| 4.31E-171 | 0.76 | 0.889 | 0.559 | 1.34E-166 | Intercalating cell of collecting duct | Cd2ap    |
| 1.94E-170 | 0.76 | 0.899 | 0.53  | 6.02E-166 | Intercalating cell of collecting duct | Gls      |
| 2.28E-170 | 0.63 | 0.829 | 0.38  | 7.05E-166 | Intercalating cell of collecting duct | Dag1     |
| 4.30E-170 | 0.57 | 0.714 | 0.272 | 1.33E-165 | Intercalating cell of collecting duct | Ralgapa2 |
| 5.44E-170 | 0.64 | 0.802 | 0.364 | 1.68E-165 | Intercalating cell of collecting duct | Anxa11   |
| 3.37E-169 | 0.65 | 0.723 | 0.215 | 1.04E-164 | Intercalating cell of collecting duct | Kcnj1    |
| 9.83E-168 | 0.54 | 0.792 | 0.338 | 3.05E-163 | Intercalating cell of collecting duct | Spint1   |
| 2.96E-166 | 0.95 | 0.877 | 0.522 | 9.17E-162 | Intercalating cell of collecting duct | Krt8     |
| 5.19E-166 | 0.64 | 0.771 | 0.312 | 1.61E-161 | Intercalating cell of collecting duct | Fzd4     |
| 1.17E-165 | 0.65 | 0.874 | 0.425 | 3.62E-161 | Intercalating cell of collecting duct | Paqr5    |
| 2.99E-165 | 0.70 | 0.746 | 0.309 | 9.26E-161 | Intercalating cell of collecting duct | Tsc22d2  |
| 3.00E-165 | 0.69 | 0.849 | 0.407 | 9.31E-161 | Intercalating cell of collecting duct | Tcea19   |
| 1.18E-164 | 0.80 | 0.827 | 0.303 | 3.66E-160 | Intercalating cell of collecting duct | Cd24a    |
| 2.06E-164 | 0.60 | 0.784 | 0.351 | 6.38E-160 | Intercalating cell of collecting duct | Elovl7   |
| 1.69E-162 | 0.58 | 0.762 | 0.28  | 5.24E-158 | Intercalating cell of collecting duct | Hspa1b   |
| 1.82E-162 | 0.69 | 0.771 | 0.355 | 5.65E-158 | Intercalating cell of collecting duct | Hif1a    |
| 2.25E-162 | 0.69 | 0.794 | 0.338 | 6.97E-158 | Intercalating cell of collecting duct | Irf2bpl  |
| 4.25E-161 | 0.50 | 0.711 | 0.27  | 1.32E-156 | Intercalating cell of collecting duct | Arhgap18 |
| 2.98E-160 | 0.59 | 0.822 | 0.41  | 9.24E-156 | Intercalating cell of collecting duct | Enpp5    |
| 1.05E-159 | 0.52 | 0.754 | 0.301 | 3.26E-155 | Intercalating cell of collecting duct | Iqgap2   |
| 2.30E-159 | 0.66 | 0.968 | 0.83  | 7.13E-155 | Intercalating cell of collecting duct | Cystm1   |
| 3.09E-159 | 0.72 | 0.963 | 0.819 | 9.58E-155 | Intercalating cell of collecting duct | Dstn     |
| 8.98E-159 | 0.76 | 0.887 | 0.529 | 2.78E-154 | Intercalating cell of collecting duct | Slc43a2  |
| 6.47E-156 | 0.76 | 0.885 | 0.641 | 2.01E-151 | Intercalating cell of collecting duct | Ptp4a2   |
| 2.52E-155 | 0.54 | 0.744 | 0.312 | 7.80E-151 | Intercalating cell of collecting duct | Met      |
| 6.84E-153 | 0.58 | 0.973 | 0.918 | 2.12E-148 | Intercalating cell of collecting duct | Gng5     |
| 2.93E-152 | 0.81 | 0.85  | 0.438 | 9.07E-148 | Intercalating cell of collecting duct | Slc38a2  |
| 2.96E-152 | 0.63 | 0.877 | 0.475 | 9.17E-148 | Intercalating cell of collecting duct | Etnk1    |
| 2.42E-151 | 0.63 | 0.713 | 0.265 | 7.49E-147 | Intercalating cell of collecting duct | Ahnak    |
| 3.47E-150 | 1.08 | 0.786 | 0.405 | 1.07E-145 | Intercalating cell of collecting duct | Hbegf    |
| 7.20E-150 | 0.70 | 0.895 | 0.58  | 2.23E-145 | Intercalating cell of collecting duct | Wwc1     |
| 1.60E-149 | 0.65 | 0.721 | 0.307 | 4.94E-145 | Intercalating cell of collecting duct | Srxn1    |
| 7.33E-148 | 0.66 | 0.897 | 0.589 | 2.27E-143 | Intercalating cell of collecting duct | Nfe2l2   |
| 3.24E-146 | 0.51 | 0.731 | 0.312 | 1.00E-141 | Intercalating cell of collecting duct | Pcyox1   |
| 4.87E-145 | 0.69 | 0.85  | 0.427 | 1.51E-140 | Intercalating cell of collecting duct | Ier2     |
| 6.25E-144 | 0.56 | 0.865 | 0.423 | 1.93E-139 | Intercalating cell of collecting duct | Anxa5    |
| 2.35E-143 | 0.76 | 0.912 | 0.705 | 7.27E-139 | Intercalating cell of collecting duct | Ivns1abp |
| 3.29E-143 | 0.71 | 0.953 | 0.813 | 1.02E-138 | Intercalating cell of collecting duct | Atp6v0b  |
| 1.35E-142 | 0.57 | 0.847 | 0.465 | 4.17E-138 | Intercalating cell of collecting duct | Mindy1   |
| 2.22E-142 | 0.51 | 0.748 | 0.334 | 6.87E-138 | Intercalating cell of collecting duct | Crb3     |
| 3.47E-142 | 0.55 | 0.741 | 0.336 | 1.08E-137 | Intercalating cell of collecting duct | Ube2h    |
| 5.27E-141 | 0.53 | 0.771 | 0.344 | 1.63E-136 | Intercalating cell of collecting duct | Nfat5    |
| 9.35E-141 | 0.68 | 0.807 | 0.402 | 2.90E-136 | Intercalating cell of collecting duct | Fam13a   |
| 1.12E-140 | 0.57 | 0.822 | 0.424 | 3.47E-136 | Intercalating cell of collecting duct | Zmiz1    |
| 9.95E-139 | 0.52 | 0.816 | 0.408 | 3.08E-134 | Intercalating cell of collecting duct | Mprip    |
| 2.87E-138 | 0.63 | 0.879 | 0.555 | 8.88E-134 | Intercalating cell of collecting duct | Dst      |
| 2.06E-137 | 0.56 | 0.741 | 0.322 | 6.38E-133 | Intercalating cell of collecting duct | Kdm6b    |
| 5.77E-137 | 0.53 | 0.791 | 0.394 | 1.79E-132 | Intercalating cell of collecting duct | Cab39    |
| 1.37E-136 | 0.61 | 0.96  | 0.824 | 4.23E-132 | Intercalating cell of collecting duct | Ctsd     |
| 3.41E-135 | 0.59 | 0.912 | 0.695 | 1.06E-130 | Intercalating cell of collecting duct | Rtn3     |
| 7.50E-135 | 0.67 | 0.834 | 0.487 | 2.32E-130 | Intercalating cell of collecting duct | Ccn11    |
| 1.38E-134 | 0.66 | 0.874 | 0.572 | 4.29E-130 | Intercalating cell of collecting duct | Cnn3     |
| 1.46E-133 | 0.60 | 0.872 | 0.52  | 4.53E-129 | Intercalating cell of collecting duct | Gstt1    |
| 2.01E-131 | 0.58 | 0.792 | 0.423 | 6.24E-127 | Intercalating cell of collecting duct | Arhgap24 |
| 3.71E-131 | 0.54 | 0.724 | 0.335 | 1.15E-126 | Intercalating cell of collecting duct | Celsr2   |
| 2.50E-130 | 0.55 | 0.704 | 0.295 | 7.75E-126 | Intercalating cell of collecting duct | Ddit3    |
| 4.81E-130 | 0.75 | 0.945 | 0.817 | 1.49E-125 | Intercalating cell of collecting duct | S100a1   |
| 1.77E-126 | 0.57 | 0.844 | 0.53  | 5.48E-122 | Intercalating cell of collecting duct | Ddx6     |
| 2.93E-126 | 0.58 | 0.92  | 0.672 | 9.07E-122 | Intercalating cell of collecting duct | Spint2   |

|           |      |       |       |           |                                       |             |
|-----------|------|-------|-------|-----------|---------------------------------------|-------------|
| 4.62E-126 | 0.65 | 0.721 | 0.34  | 1.43E-121 | Intercalating cell of collecting duct | Midn        |
| 5.33E-126 | 0.55 | 0.855 | 0.491 | 1.65E-121 | Intercalating cell of collecting duct | Mbnl2       |
| 4.12E-125 | 1.87 | 0.949 | 0.816 | 1.28E-120 | Intercalating cell of collecting duct | S100g       |
| 7.26E-123 | 0.71 | 0.862 | 0.51  | 2.25E-118 | Intercalating cell of collecting duct | S100a11     |
| 7.94E-123 | 0.57 | 0.884 | 0.623 | 2.46E-118 | Intercalating cell of collecting duct | Wls         |
| 1.98E-122 | 0.58 | 0.792 | 0.407 | 6.15E-118 | Intercalating cell of collecting duct | Jup         |
| 5.49E-119 | 0.56 | 0.973 | 0.851 | 1.70E-114 | Intercalating cell of collecting duct | Jund        |
| 6.13E-119 | 0.65 | 0.761 | 0.382 | 1.90E-114 | Intercalating cell of collecting duct | Dnajb1      |
| 6.67E-119 | 0.62 | 0.831 | 0.522 | 2.07E-114 | Intercalating cell of collecting duct | Col4a4      |
| 1.35E-118 | 0.52 | 0.875 | 0.407 | 4.17E-114 | Intercalating cell of collecting duct | Acss1       |
| 9.45E-117 | 0.55 | 0.904 | 0.7   | 2.93E-112 | Intercalating cell of collecting duct | Ctnnb1      |
| 5.73E-116 | 0.51 | 0.812 | 0.479 | 1.78E-111 | Intercalating cell of collecting duct | Pkn2        |
| 1.02E-114 | 0.68 | 0.889 | 0.667 | 3.17E-110 | Intercalating cell of collecting duct | Ddx3x       |
| 1.68E-114 | 0.97 | 0.952 | 0.734 | 5.20E-110 | Intercalating cell of collecting duct | Spp1        |
| 3.16E-112 | 0.50 | 0.713 | 0.345 | 9.77E-108 | Intercalating cell of collecting duct | Map2k3      |
| 8.08E-112 | 0.54 | 0.831 | 0.509 | 2.50E-107 | Intercalating cell of collecting duct | Glg1        |
| 1.91E-110 | 0.53 | 0.816 | 0.493 | 5.93E-106 | Intercalating cell of collecting duct | Plxn2       |
| 6.95E-110 | 0.54 | 0.865 | 0.574 | 2.15E-105 | Intercalating cell of collecting duct | Purb        |
| 2.48E-109 | 0.52 | 0.806 | 0.48  | 7.67E-105 | Intercalating cell of collecting duct | 900097C17Ri |
| 6.52E-109 | 0.57 | 0.849 | 0.558 | 2.02E-104 | Intercalating cell of collecting duct | Bicc1       |
| 7.42E-109 | 0.58 | 0.945 | 0.77  | 2.30E-104 | Intercalating cell of collecting duct | Jun         |
| 1.27E-108 | 0.57 | 0.86  | 0.598 | 3.92E-104 | Intercalating cell of collecting duct | Ctnna1      |
| 1.79E-108 | 0.59 | 0.935 | 0.783 | 5.54E-104 | Intercalating cell of collecting duct | Ezr         |
| 2.96E-106 | 0.51 | 0.85  | 0.519 | 9.17E-102 | Intercalating cell of collecting duct | Nfkbia      |
| 5.32E-105 | 0.51 | 0.924 | 0.735 | 1.65E-100 | Intercalating cell of collecting duct | Ogdh        |
| 1.62E-104 | 0.53 | 0.841 | 0.558 | 5.02E-100 | Intercalating cell of collecting duct | Nfic        |
| 4.30E-100 | 0.58 | 0.934 | 0.739 | 1.33E-95  | Intercalating cell of collecting duct | Neat1       |
| 4.82E-100 | 0.51 | 0.865 | 0.578 | 1.49E-95  | Intercalating cell of collecting duct | Alkbh5      |
| 4.05E-99  | 0.51 | 0.779 | 0.456 | 1.25E-94  | Intercalating cell of collecting duct | Syne2       |
| 2.06E-98  | 1.10 | 0.673 | 0.351 | 6.39E-94  | Intercalating cell of collecting duct | Npnt        |
| 4.52E-94  | 0.59 | 0.847 | 0.565 | 1.40E-89  | Intercalating cell of collecting duct | Irf2bp2     |
| 1.30E-92  | 0.51 | 0.826 | 0.523 | 4.02E-88  | Intercalating cell of collecting duct | Ptpf        |
| 1.67E-87  | 1.69 | 0.872 | 0.618 | 5.18E-83  | Intercalating cell of collecting duct | Klk1        |
| 2.15E-87  | 0.53 | 0.841 | 0.463 | 6.67E-83  | Intercalating cell of collecting duct | Ly6e        |
| 5.96E-78  | 0.62 | 0.764 | 0.49  | 1.85E-73  | Intercalating cell of collecting duct | Lmna        |
| 2.85E-60  | 0.53 | 0.85  | 0.69  | 8.82E-56  | Intercalating cell of collecting duct | Zfp3611     |
| 3.19E-50  | 0.78 | 0.721 | 0.585 | 9.87E-46  | Intercalating cell of collecting duct | Kl          |
| 2.21E-34  | 0.68 | 0.608 | 0.498 | 6.83E-30  | Intercalating cell of collecting duct | Tmem229a    |
| 0.00E+00  | 3.19 | 0.974 | 0.063 | 0.00E+00  | Principal cell of collecting duct     | Hsd11b2     |
| 0.00E+00  | 3.18 | 0.847 | 0.041 | 0.00E+00  | Principal cell of collecting duct     | Aqp2        |
| 0.00E+00  | 2.74 | 0.645 | 0.076 | 0.00E+00  | Principal cell of collecting duct     | Fxyd4       |
| 0.00E+00  | 2.01 | 0.967 | 0.077 | 0.00E+00  | Principal cell of collecting duct     | Rhcg        |
| 0.00E+00  | 1.86 | 0.882 | 0.104 | 0.00E+00  | Principal cell of collecting duct     | Slc8a1      |
| 0.00E+00  | 1.80 | 0.944 | 0.045 | 0.00E+00  | Principal cell of collecting duct     | Scnn1b      |
| 0.00E+00  | 1.69 | 0.811 | 0.112 | 0.00E+00  | Principal cell of collecting duct     | Gm44120     |
| 0.00E+00  | 1.62 | 0.903 | 0.105 | 0.00E+00  | Principal cell of collecting duct     | Tacstd2     |
| 0.00E+00  | 1.61 | 0.992 | 0.266 | 0.00E+00  | Principal cell of collecting duct     | Tmem213     |
| 0.00E+00  | 1.61 | 0.893 | 0.043 | 0.00E+00  | Principal cell of collecting duct     | Rhbg        |
| 0.00E+00  | 1.60 | 0.928 | 0.185 | 0.00E+00  | Principal cell of collecting duct     | Lgals3      |
| 0.00E+00  | 1.54 | 0.783 | 0.05  | 0.00E+00  | Principal cell of collecting duct     | Cldn4       |
| 0.00E+00  | 1.47 | 0.852 | 0.142 | 0.00E+00  | Principal cell of collecting duct     | Pgam2       |
| 0.00E+00  | 1.45 | 0.777 | 0.085 | 0.00E+00  | Principal cell of collecting duct     | Krt18       |
| 0.00E+00  | 1.36 | 0.652 | 0.071 | 0.00E+00  | Principal cell of collecting duct     | Apela       |
| 0.00E+00  | 1.32 | 0.87  | 0.053 | 0.00E+00  | Principal cell of collecting duct     | Tmem45b     |
| 0.00E+00  | 1.31 | 0.872 | 0.027 | 0.00E+00  | Principal cell of collecting duct     | Scnn1g      |
| 0.00E+00  | 1.30 | 0.91  | 0.197 | 0.00E+00  | Principal cell of collecting duct     | Krt7        |
| 0.00E+00  | 1.27 | 0.885 | 0.117 | 0.00E+00  | Principal cell of collecting duct     | Tspan1      |
| 0.00E+00  | 1.25 | 0.893 | 0.087 | 0.00E+00  | Principal cell of collecting duct     | Cav2        |
| 0.00E+00  | 1.23 | 0.959 | 0.2   | 0.00E+00  | Principal cell of collecting duct     | Tspan8      |
| 0.00E+00  | 1.23 | 0.875 | 0.105 | 0.00E+00  | Principal cell of collecting duct     | Scd2        |
| 0.00E+00  | 1.19 | 0.939 | 0.181 | 0.00E+00  | Principal cell of collecting duct     | Scnn1a      |
| 0.00E+00  | 1.18 | 0.841 | 0.04  | 0.00E+00  | Principal cell of collecting duct     | Ptges       |
| 0.00E+00  | 1.12 | 0.818 | 0.134 | 0.00E+00  | Principal cell of collecting duct     | Cldn7       |
| 0.00E+00  | 1.12 | 0.875 | 0.134 | 0.00E+00  | Principal cell of collecting duct     | Cldn8       |

|           |      |       |       |           |                                   |           |
|-----------|------|-------|-------|-----------|-----------------------------------|-----------|
| 0.00E+00  | 1.02 | 0.793 | 0.067 | 0.00E+00  | Principal cell of collecting duct | Ptgs1     |
| 0.00E+00  | 1.02 | 0.783 | 0.049 | 0.00E+00  | Principal cell of collecting duct | Olfm1     |
| 0.00E+00  | 0.98 | 0.662 | 0.064 | 0.00E+00  | Principal cell of collecting duct | Ehf       |
| 0.00E+00  | 0.97 | 0.701 | 0.06  | 0.00E+00  | Principal cell of collecting duct | Gata2     |
| 0.00E+00  | 0.95 | 0.78  | 0.119 | 0.00E+00  | Principal cell of collecting duct | Smim5     |
| 0.00E+00  | 0.94 | 0.757 | 0.059 | 0.00E+00  | Principal cell of collecting duct | Gata3     |
| 0.00E+00  | 0.92 | 0.721 | 0.084 | 0.00E+00  | Principal cell of collecting duct | Blnk      |
| 0.00E+00  | 0.92 | 0.65  | 0.055 | 0.00E+00  | Principal cell of collecting duct | Sptbn2    |
| 0.00E+00  | 0.91 | 0.716 | 0.066 | 0.00E+00  | Principal cell of collecting duct | Cav1      |
| 0.00E+00  | 0.91 | 0.621 | 0.024 | 0.00E+00  | Principal cell of collecting duct | Avpr2     |
| 0.00E+00  | 0.91 | 0.765 | 0.06  | 0.00E+00  | Principal cell of collecting duct | Phactr1   |
| 0.00E+00  | 0.89 | 0.621 | 0.065 | 0.00E+00  | Principal cell of collecting duct | Rasd1     |
| 0.00E+00  | 0.88 | 0.78  | 0.115 | 0.00E+00  | Principal cell of collecting duct | Kcnj10    |
| 0.00E+00  | 0.85 | 0.634 | 0.084 | 0.00E+00  | Principal cell of collecting duct | Mal2      |
| 0.00E+00  | 0.82 | 0.77  | 0.098 | 0.00E+00  | Principal cell of collecting duct | Atp6v1b1  |
| 0.00E+00  | 0.81 | 0.606 | 0.035 | 0.00E+00  | Principal cell of collecting duct | Spink8    |
| 0.00E+00  | 0.76 | 0.662 | 0.048 | 0.00E+00  | Principal cell of collecting duct | L1cam     |
| 0.00E+00  | 0.71 | 0.678 | 0.075 | 0.00E+00  | Principal cell of collecting duct | Slc35g1   |
| 0.00E+00  | 0.64 | 0.662 | 0.077 | 0.00E+00  | Principal cell of collecting duct | Kcnq1     |
| 5.56E-302 | 1.28 | 0.941 | 0.229 | 1.72E-297 | Principal cell of collecting duct | Calb1     |
| 1.01E-300 | 1.23 | 0.964 | 0.216 | 3.14E-296 | Principal cell of collecting duct | Kcnj1     |
| 3.43E-299 | 2.26 | 0.905 | 0.228 | 1.06E-294 | Principal cell of collecting duct | Clu       |
| 1.95E-298 | 2.27 | 0.811 | 0.187 | 6.05E-294 | Principal cell of collecting duct | Aqp3      |
| 1.16E-296 | 0.93 | 0.811 | 0.15  | 3.60E-292 | Principal cell of collecting duct | Tesc      |
| 2.63E-291 | 1.69 | 0.882 | 0.202 | 8.14E-287 | Principal cell of collecting duct | Tmem52b   |
| 6.47E-281 | 0.71 | 0.611 | 0.085 | 2.00E-276 | Principal cell of collecting duct | Atp4a     |
| 1.61E-279 | 1.22 | 0.936 | 0.211 | 4.98E-275 | Principal cell of collecting duct | Clnkb     |
| 4.10E-276 | 1.58 | 0.99  | 0.318 | 1.27E-271 | Principal cell of collecting duct | Mal       |
| 9.69E-275 | 0.89 | 0.701 | 0.131 | 3.00E-270 | Principal cell of collecting duct | Tpd52l1   |
| 5.58E-272 | 0.88 | 0.839 | 0.163 | 1.73E-267 | Principal cell of collecting duct | Tfap2b    |
| 7.52E-269 | 1.45 | 0.936 | 0.312 | 2.33E-264 | Principal cell of collecting duct | Cdo1      |
| 1.37E-265 | 0.73 | 0.614 | 0.094 | 4.24E-261 | Principal cell of collecting duct | Serpinc1a |
| 2.33E-264 | 1.91 | 0.99  | 0.372 | 7.21E-260 | Principal cell of collecting duct | Wfdc2     |
| 1.02E-261 | 0.64 | 0.675 | 0.111 | 3.15E-257 | Principal cell of collecting duct | Slc29a1   |
| 3.16E-257 | 0.63 | 0.614 | 0.094 | 9.79E-253 | Principal cell of collecting duct | Thbs1     |
| 5.16E-251 | 0.55 | 0.652 | 0.103 | 1.60E-246 | Principal cell of collecting duct | Kitl      |
| 6.63E-250 | 1.62 | 1     | 0.372 | 2.05E-245 | Principal cell of collecting duct | Defb1     |
| 1.25E-246 | 0.65 | 0.693 | 0.121 | 3.88E-242 | Principal cell of collecting duct | Slit2     |
| 7.32E-244 | 1.11 | 0.885 | 0.257 | 2.27E-239 | Principal cell of collecting duct | Cdkl1     |
| 2.48E-241 | 1.05 | 0.91  | 0.214 | 7.68E-237 | Principal cell of collecting duct | Epcam     |
| 1.58E-237 | 1.39 | 0.982 | 0.38  | 4.89E-233 | Principal cell of collecting duct | Cd9       |
| 2.71E-237 | 1.86 | 0.985 | 0.418 | 8.41E-233 | Principal cell of collecting duct | Sh3bgrl3  |
| 1.15E-227 | 0.64 | 0.691 | 0.127 | 3.55E-223 | Principal cell of collecting duct | Ckmt1     |
| 9.87E-225 | 0.77 | 0.752 | 0.179 | 3.06E-220 | Principal cell of collecting duct | Tmem178   |
| 2.64E-221 | 0.64 | 0.726 | 0.147 | 8.19E-217 | Principal cell of collecting duct | Tspan12   |
| 4.55E-221 | 1.03 | 0.89  | 0.283 | 1.41E-216 | Principal cell of collecting duct | Cdh1      |
| 2.81E-220 | 0.64 | 0.668 | 0.129 | 8.71E-216 | Principal cell of collecting duct | Casz1     |
| 2.12E-219 | 1.13 | 0.913 | 0.296 | 6.56E-215 | Principal cell of collecting duct | Aif1l     |
| 1.42E-215 | 0.62 | 0.652 | 0.127 | 4.39E-211 | Principal cell of collecting duct | Grb14     |
| 4.69E-213 | 0.72 | 0.711 | 0.154 | 1.45E-208 | Principal cell of collecting duct | Slc2a1    |
| 1.55E-212 | 0.52 | 0.639 | 0.114 | 4.82E-208 | Principal cell of collecting duct | St14      |
| 1.99E-212 | 0.72 | 0.742 | 0.169 | 6.16E-208 | Principal cell of collecting duct | Akr1c19   |
| 6.05E-211 | 1.04 | 0.67  | 0.137 | 1.88E-206 | Principal cell of collecting duct | Gstm2     |
| 8.84E-211 | 1.08 | 0.721 | 0.18  | 2.74E-206 | Principal cell of collecting duct | Tbck      |
| 1.35E-209 | 0.76 | 0.834 | 0.189 | 4.17E-205 | Principal cell of collecting duct | Slc16a7   |
| 9.48E-209 | 1.41 | 0.985 | 0.738 | 2.94E-204 | Principal cell of collecting duct | Cdh16     |
| 1.36E-198 | 0.73 | 0.747 | 0.186 | 4.20E-194 | Principal cell of collecting duct | Hoxd9     |
| 2.31E-196 | 0.70 | 0.785 | 0.174 | 7.14E-192 | Principal cell of collecting duct | Sostdc1   |
| 4.30E-196 | 0.66 | 0.693 | 0.166 | 1.33E-191 | Principal cell of collecting duct | C77080    |
| 1.02E-195 | 0.72 | 0.714 | 0.166 | 3.17E-191 | Principal cell of collecting duct | Ermp1     |
| 1.76E-192 | 0.70 | 0.77  | 0.182 | 5.45E-188 | Principal cell of collecting duct | Mecom     |
| 1.49E-184 | 0.75 | 0.793 | 0.241 | 4.62E-180 | Principal cell of collecting duct | Tbx2      |
| 1.54E-184 | 0.85 | 1     | 0.99  | 4.76E-180 | Principal cell of collecting duct | Itm2b     |
| 3.41E-180 | 1.38 | 0.992 | 0.65  | 1.06E-175 | Principal cell of collecting duct | Nudt4     |

|           |      |       |       |           |                                   |          |
|-----------|------|-------|-------|-----------|-----------------------------------|----------|
| 1.20E-179 | 1.16 | 0.946 | 0.516 | 3.72E-175 | Principal cell of collecting duct | Adgrg1   |
| 4.98E-173 | 0.81 | 0.795 | 0.232 | 1.54E-168 | Principal cell of collecting duct | Cd82     |
| 3.98E-172 | 0.94 | 0.857 | 0.351 | 1.23E-167 | Principal cell of collecting duct | Tmprss2  |
| 4.77E-170 | 0.71 | 0.785 | 0.227 | 1.48E-165 | Principal cell of collecting duct | Pou3f3   |
| 2.74E-169 | 0.83 | 0.852 | 0.282 | 8.50E-165 | Principal cell of collecting duct | Hoxd8    |
| 5.18E-166 | 0.59 | 0.624 | 0.138 | 1.61E-161 | Principal cell of collecting duct | Pea15a   |
| 2.72E-164 | 0.77 | 0.765 | 0.235 | 8.43E-160 | Principal cell of collecting duct | Acsl5    |
| 1.50E-163 | 1.09 | 0.959 | 0.611 | 4.66E-159 | Principal cell of collecting duct | Tfcp2l1  |
| 4.43E-163 | 1.03 | 1     | 0.9   | 1.37E-158 | Principal cell of collecting duct | Atp1b1   |
| 7.22E-159 | 0.60 | 0.762 | 0.202 | 2.24E-154 | Principal cell of collecting duct | Bcam     |
| 2.92E-152 | 0.77 | 0.949 | 0.345 | 9.04E-148 | Principal cell of collecting duct | Pkm      |
| 6.43E-152 | 1.16 | 0.985 | 0.687 | 1.99E-147 | Principal cell of collecting duct | Serinc3  |
| 4.27E-150 | 0.87 | 0.831 | 0.358 | 1.32E-145 | Principal cell of collecting duct | Hif1a    |
| 1.96E-148 | 0.88 | 0.982 | 0.786 | 6.06E-144 | Principal cell of collecting duct | Atp6v0e  |
| 2.24E-144 | 0.82 | 0.816 | 0.315 | 6.93E-140 | Principal cell of collecting duct | Fzd4     |
| 4.65E-144 | 0.92 | 0.913 | 0.523 | 1.44E-139 | Principal cell of collecting duct | Gstt1    |
| 9.37E-144 | 0.67 | 0.806 | 0.247 | 2.90E-139 | Principal cell of collecting duct | Efhf1    |
| 1.92E-143 | 0.71 | 0.795 | 0.304 | 5.94E-139 | Principal cell of collecting duct | Iqgap2   |
| 8.92E-141 | 0.89 | 0.864 | 0.363 | 2.76E-136 | Principal cell of collecting duct | Iqgap1   |
| 3.56E-140 | 0.83 | 0.831 | 0.367 | 1.10E-135 | Principal cell of collecting duct | Anxa11   |
| 1.43E-139 | 0.55 | 0.716 | 0.202 | 4.44E-135 | Principal cell of collecting duct | Rap1gap  |
| 1.07E-135 | 0.87 | 0.76  | 0.268 | 3.31E-131 | Principal cell of collecting duct | Ahnak    |
| 4.52E-133 | 0.65 | 0.793 | 0.295 | 1.40E-128 | Principal cell of collecting duct | Col18a1  |
| 2.05E-132 | 1.31 | 0.816 | 0.352 | 6.35E-128 | Principal cell of collecting duct | Npnt     |
| 5.34E-130 | 0.67 | 0.826 | 0.331 | 1.66E-125 | Principal cell of collecting duct | Pbxip1   |
| 1.91E-129 | 0.60 | 0.632 | 0.184 | 5.93E-125 | Principal cell of collecting duct | Emx1     |
| 1.63E-125 | 0.67 | 0.777 | 0.302 | 5.06E-121 | Principal cell of collecting duct | Smco4    |
| 3.29E-125 | 0.80 | 0.982 | 0.81  | 1.02E-120 | Principal cell of collecting duct | Sdc4     |
| 9.84E-125 | 0.64 | 0.803 | 0.335 | 3.05E-120 | Principal cell of collecting duct | Ddr1     |
| 7.31E-124 | 0.65 | 0.752 | 0.28  | 2.26E-119 | Principal cell of collecting duct | Trim2    |
| 1.19E-123 | 0.91 | 0.959 | 0.719 | 3.67E-119 | Principal cell of collecting duct | Alpl2    |
| 1.04E-122 | 0.50 | 0.701 | 0.235 | 3.23E-118 | Principal cell of collecting duct | Tgfbr1   |
| 9.81E-122 | 0.75 | 0.811 | 0.364 | 3.04E-117 | Principal cell of collecting duct | Pmepa1   |
| 1.17E-120 | 0.74 | 0.678 | 0.233 | 3.63E-116 | Principal cell of collecting duct | Rnf186   |
| 1.37E-119 | 0.79 | 0.893 | 0.523 | 4.25E-115 | Principal cell of collecting duct | Col4a4   |
| 1.20E-118 | 0.75 | 0.867 | 0.307 | 3.72E-114 | Principal cell of collecting duct | Cd24a    |
| 1.65E-118 | 0.77 | 0.959 | 0.706 | 5.11E-114 | Principal cell of collecting duct | Ivns1abp |
| 1.74E-117 | 0.69 | 0.772 | 0.324 | 5.38E-113 | Principal cell of collecting duct | Pdcd4    |
| 4.25E-117 | 0.71 | 0.977 | 0.889 | 1.32E-112 | Principal cell of collecting duct | Atp6v1f  |
| 1.10E-113 | 0.56 | 0.693 | 0.253 | 3.40E-109 | Principal cell of collecting duct | Flnb     |
| 1.10E-113 | 0.64 | 0.754 | 0.298 | 3.41E-109 | Principal cell of collecting duct | Tanc1    |
| 1.37E-113 | 2.86 | 0.949 | 0.817 | 4.23E-109 | Principal cell of collecting duct | S100g    |
| 9.30E-113 | 0.76 | 0.964 | 0.826 | 2.88E-108 | Principal cell of collecting duct | Ctsd     |
| 4.42E-112 | 1.03 | 0.934 | 0.465 | 1.37E-107 | Principal cell of collecting duct | Ly6e     |
| 2.02E-109 | 0.68 | 0.859 | 0.414 | 6.27E-105 | Principal cell of collecting duct | Nfe2l1   |
| 1.96E-105 | 1.29 | 0.862 | 0.584 | 6.08E-101 | Principal cell of collecting duct | Kl       |
| 2.48E-105 | 0.51 | 0.68  | 0.242 | 7.69E-101 | Principal cell of collecting duct | Snhg4    |
| 2.75E-104 | 0.73 | 0.957 | 0.818 | 8.52E-100 | Principal cell of collecting duct | S100a1   |
| 3.67E-103 | 0.57 | 0.698 | 0.271 | 1.14E-98  | Principal cell of collecting duct | Clstn1   |
| 8.24E-102 | 0.69 | 0.908 | 0.625 | 2.55E-97  | Principal cell of collecting duct | Wls      |
| 1.16E-98  | 0.52 | 0.749 | 0.279 | 3.59E-94  | Principal cell of collecting duct | Tacc1    |
| 9.07E-98  | 0.64 | 0.734 | 0.338 | 2.81E-93  | Principal cell of collecting duct | Celsr2   |
| 9.77E-96  | 0.61 | 0.857 | 0.428 | 3.03E-91  | Principal cell of collecting duct | Paqr5    |
| 3.08E-95  | 0.72 | 0.88  | 0.6   | 9.55E-91  | Principal cell of collecting duct | Ctnna1   |
| 1.05E-94  | 0.68 | 0.957 | 0.831 | 3.26E-90  | Principal cell of collecting duct | Cystm1   |
| 1.60E-94  | 0.53 | 0.67  | 0.269 | 4.96E-90  | Principal cell of collecting duct | Peli2    |
| 5.65E-94  | 0.62 | 0.729 | 0.294 | 1.75E-89  | Principal cell of collecting duct | Gsta4    |
| 1.53E-92  | 0.66 | 0.834 | 0.457 | 4.75E-88  | Principal cell of collecting duct | Syne2    |
| 3.79E-92  | 0.59 | 0.77  | 0.314 | 1.17E-87  | Principal cell of collecting duct | Hes1     |
| 5.56E-92  | 0.53 | 0.616 | 0.223 | 1.72E-87  | Principal cell of collecting duct | Map3k1   |
| 1.19E-91  | 0.75 | 0.959 | 0.698 | 3.69E-87  | Principal cell of collecting duct | Txnip    |
| 6.90E-91  | 0.54 | 0.772 | 0.364 | 2.14E-86  | Principal cell of collecting duct | Pkhd1    |
| 2.77E-90  | 0.76 | 0.887 | 0.528 | 8.58E-86  | Principal cell of collecting duct | Tmsb4x   |
| 1.86E-89  | 0.57 | 0.703 | 0.316 | 5.77E-85  | Principal cell of collecting duct | Pcyox1   |

|          |      |       |       |          |                                   |          |
|----------|------|-------|-------|----------|-----------------------------------|----------|
| 1.99E-89 | 0.67 | 0.788 | 0.426 | 6.17E-85 | Principal cell of collecting duct | Arhgap24 |
| 6.91E-88 | 0.54 | 0.714 | 0.326 | 2.14E-83 | Principal cell of collecting duct | Pigt     |
| 7.42E-88 | 0.55 | 0.696 | 0.298 | 2.30E-83 | Principal cell of collecting duct | Nedd4l   |
| 2.22E-87 | 0.68 | 0.859 | 0.534 | 6.89E-83 | Principal cell of collecting duct | Gls      |
| 3.27E-87 | 0.59 | 0.816 | 0.439 | 1.01E-82 | Principal cell of collecting duct | Lman1    |
| 6.12E-87 | 2.96 | 0.885 | 0.62  | 1.90E-82 | Principal cell of collecting duct | Klk1     |
| 1.32E-85 | 0.67 | 0.857 | 0.535 | 4.10E-81 | Principal cell of collecting duct | ccdc198  |
| 1.85E-85 | 0.60 | 0.839 | 0.495 | 5.73E-81 | Principal cell of collecting duct | Plxn2    |
| 1.95E-84 | 0.64 | 0.934 | 0.763 | 6.04E-80 | Principal cell of collecting duct | Atp6v1a  |
| 8.86E-83 | 0.52 | 0.68  | 0.307 | 2.74E-78 | Principal cell of collecting duct | Rragd    |
| 3.44E-82 | 0.54 | 0.703 | 0.326 | 1.06E-77 | Principal cell of collecting duct | Cbx5     |
| 1.15E-81 | 0.51 | 0.977 | 0.93  | 3.57E-77 | Principal cell of collecting duct | Aldoa    |
| 1.57E-81 | 0.60 | 0.951 | 0.674 | 4.87E-77 | Principal cell of collecting duct | Spint2   |
| 4.59E-81 | 0.59 | 0.785 | 0.449 | 1.42E-76 | Principal cell of collecting duct | Pgp      |
| 1.05E-78 | 1.21 | 0.923 | 0.736 | 3.25E-74 | Principal cell of collecting duct | Spp1     |
| 1.25E-78 | 0.66 | 0.99  | 0.964 | 3.87E-74 | Principal cell of collecting duct | Atp1a1   |
| 4.66E-77 | 0.60 | 0.867 | 0.575 | 1.44E-72 | Principal cell of collecting duct | Cnn3     |
| 1.95E-74 | 0.57 | 0.675 | 0.34  | 6.05E-70 | Principal cell of collecting duct | Ube2h    |
| 1.07E-73 | 0.55 | 0.862 | 0.56  | 3.31E-69 | Principal cell of collecting duct | Nfic     |
| 2.18E-73 | 0.53 | 0.803 | 0.464 | 6.76E-69 | Principal cell of collecting duct | F11r     |
| 1.43E-72 | 0.55 | 0.826 | 0.512 | 4.43E-68 | Principal cell of collecting duct | Glg1     |
| 1.70E-72 | 0.63 | 0.762 | 0.411 | 5.27E-68 | Principal cell of collecting duct | Tceal9   |
| 3.53E-72 | 0.51 | 0.76  | 0.414 | 1.09E-67 | Principal cell of collecting duct | Enpp5    |
| 1.43E-67 | 0.68 | 0.757 | 0.354 | 4.42E-63 | Principal cell of collecting duct | Kng2     |
| 6.78E-67 | 0.52 | 0.806 | 0.469 | 2.10E-62 | Principal cell of collecting duct | Ppargc1a |
| 4.62E-65 | 0.50 | 0.926 | 0.726 | 1.43E-60 | Principal cell of collecting duct | Tspo     |
| 8.82E-65 | 0.54 | 0.852 | 0.584 | 2.73E-60 | Principal cell of collecting duct | Wwc1     |
| 1.21E-61 | 0.55 | 0.711 | 0.385 | 3.75E-57 | Principal cell of collecting duct | Rogdi    |
| 1.27E-61 | 0.61 | 0.634 | 0.314 | 3.92E-57 | Principal cell of collecting duct | Tsc22d2  |
| 1.48E-59 | 0.58 | 0.826 | 0.563 | 4.58E-55 | Principal cell of collecting duct | Cd2ap    |
| 3.45E-59 | 0.51 | 0.813 | 0.525 | 1.07E-54 | Principal cell of collecting duct | Ptprf    |
| 1.99E-58 | 0.94 | 0.703 | 0.498 | 6.15E-54 | Principal cell of collecting duct | Tmem229a |
| 1.91E-53 | 0.52 | 0.844 | 0.643 | 5.91E-49 | Principal cell of collecting duct | Ptp4a2   |
| 4.77E-53 | 0.87 | 0.785 | 0.526 | 1.48E-48 | Principal cell of collecting duct | Krt8     |
| 3.27E-52 | 1.12 | 0.795 | 0.537 | 1.01E-47 | Principal cell of collecting duct | Chka     |
| 1.24E-48 | 0.53 | 0.606 | 0.327 | 3.85E-44 | Principal cell of collecting duct | Map3k2   |
| 2.85E-48 | 0.74 | 0.813 | 0.58  | 8.83E-44 | Principal cell of collecting duct | Wnk1     |
| 2.18E-44 | 0.72 | 0.908 | 0.741 | 6.76E-40 | Principal cell of collecting duct | Neat1    |
| 1.39E-42 | 0.60 | 0.708 | 0.414 | 4.29E-38 | Principal cell of collecting duct | Ier3     |
| 4.56E-40 | 0.55 | 0.962 | 0.819 | 1.41E-35 | Principal cell of collecting duct | Pdzk1ip1 |
| 2.24E-34 | 0.51 | 0.765 | 0.481 | 6.94E-30 | Principal cell of collecting duct | Btg2     |
| 1.85E-28 | 0.54 | 0.739 | 0.515 | 5.72E-24 | Principal cell of collecting duct | S100a11  |
| 4.39E-25 | 0.67 | 0.662 | 0.487 | 1.36E-20 | Principal cell of collecting duct | Egr1     |
| 1.91E-21 | 0.82 | 0.685 | 0.587 | 5.92E-17 | Principal cell of collecting duct | Fos      |
| 3.19E-14 | 0.70 | 0.67  | 0.559 | 9.87E-10 | Principal cell of collecting duct | Klf6     |
| 0.00E+00 | 3.79 | 0.873 | 0.042 | 0.00E+00 | Fibroblast                        | Lyz2     |
| 0.00E+00 | 2.98 | 0.994 | 0.037 | 0.00E+00 | Fibroblast                        | Tyrbp    |
| 0.00E+00 | 2.94 | 0.898 | 0.034 | 0.00E+00 | Fibroblast                        | Ii1b     |
| 0.00E+00 | 2.81 | 0.981 | 0.045 | 0.00E+00 | Fibroblast                        | Cd52     |
| 0.00E+00 | 2.69 | 0.914 | 0.045 | 0.00E+00 | Fibroblast                        | Fcer1g   |
| 0.00E+00 | 2.38 | 0.997 | 0.129 | 0.00E+00 | Fibroblast                        | Srgn     |
| 0.00E+00 | 2.27 | 0.94  | 0.036 | 0.00E+00 | Fibroblast                        | Coro1a   |
| 0.00E+00 | 2.27 | 0.927 | 0.141 | 0.00E+00 | Fibroblast                        | Ifitm3   |
| 0.00E+00 | 2.22 | 0.975 | 0.107 | 0.00E+00 | Fibroblast                        | Fxyd5    |
| 0.00E+00 | 2.21 | 0.651 | 0.023 | 0.00E+00 | Fibroblast                        | Wfdc17   |
| 0.00E+00 | 2.16 | 0.803 | 0.019 | 0.00E+00 | Fibroblast                        | Ccl6     |
| 0.00E+00 | 2.15 | 0.933 | 0.031 | 0.00E+00 | Fibroblast                        | Alox5ap  |
| 0.00E+00 | 2.13 | 0.93  | 0.021 | 0.00E+00 | Fibroblast                        | Lsp1     |
| 0.00E+00 | 2.11 | 0.724 | 0.026 | 0.00E+00 | Fibroblast                        | Cybb     |
| 0.00E+00 | 2.08 | 0.819 | 0.104 | 0.00E+00 | Fibroblast                        | Vim      |
| 0.00E+00 | 2.01 | 0.914 | 0.175 | 0.00E+00 | Fibroblast                        | Pim1     |
| 0.00E+00 | 2.00 | 0.943 | 0.037 | 0.00E+00 | Fibroblast                        | Laptn5   |
| 0.00E+00 | 1.98 | 0.686 | 0.056 | 0.00E+00 | Fibroblast                        | Cd14     |
| 0.00E+00 | 1.96 | 0.933 | 0.135 | 0.00E+00 | Fibroblast                        | Cytip    |

|          |      |       |       |          |            |          |
|----------|------|-------|-------|----------|------------|----------|
| 0.00E+00 | 1.94 | 0.946 | 0.041 | 0.00E+00 | Fibroblast | Ptprc    |
| 0.00E+00 | 1.94 | 0.838 | 0.044 | 0.00E+00 | Fibroblast | Slfn2    |
| 0.00E+00 | 1.92 | 0.933 | 0.082 | 0.00E+00 | Fibroblast | Lcp1     |
| 0.00E+00 | 1.89 | 0.841 | 0.118 | 0.00E+00 | Fibroblast | S100a6   |
| 0.00E+00 | 1.88 | 0.886 | 0.019 | 0.00E+00 | Fibroblast | Plek     |
| 0.00E+00 | 1.87 | 0.825 | 0.016 | 0.00E+00 | Fibroblast | Cd44     |
| 0.00E+00 | 1.87 | 0.844 | 0.076 | 0.00E+00 | Fibroblast | Rel      |
| 0.00E+00 | 1.84 | 0.886 | 0.037 | 0.00E+00 | Fibroblast | Ctss     |
| 0.00E+00 | 1.80 | 0.613 | 0.046 | 0.00E+00 | Fibroblast | Ifi2712a |
| 0.00E+00 | 1.80 | 0.863 | 0.062 | 0.00E+00 | Fibroblast | Marcks   |
| 0.00E+00 | 1.80 | 0.787 | 0.037 | 0.00E+00 | Fibroblast | Cd83     |
| 0.00E+00 | 1.77 | 0.87  | 0.021 | 0.00E+00 | Fibroblast | Spi1     |
| 0.00E+00 | 1.74 | 0.698 | 0.032 | 0.00E+00 | Fibroblast | Traf1    |
| 0.00E+00 | 1.70 | 0.667 | 0.018 | 0.00E+00 | Fibroblast | Ms4a6c   |
| 0.00E+00 | 1.69 | 0.737 | 0.042 | 0.00E+00 | Fibroblast | Dusp2    |
| 0.00E+00 | 1.66 | 0.702 | 0.026 | 0.00E+00 | Fibroblast | Lst1     |
| 0.00E+00 | 1.63 | 0.67  | 0.079 | 0.00E+00 | Fibroblast | Marcks1  |
| 0.00E+00 | 1.61 | 0.797 | 0.086 | 0.00E+00 | Fibroblast | Emp3     |
| 0.00E+00 | 1.61 | 0.867 | 0.054 | 0.00E+00 | Fibroblast | Arhgdib  |
| 0.00E+00 | 1.58 | 0.635 | 0.076 | 0.00E+00 | Fibroblast | H2-DMa   |
| 0.00E+00 | 1.54 | 0.749 | 0.022 | 0.00E+00 | Fibroblast | Mpeg1    |
| 0.00E+00 | 1.52 | 0.873 | 0.026 | 0.00E+00 | Fibroblast | Cd53     |
| 0.00E+00 | 1.51 | 0.657 | 0.028 | 0.00E+00 | Fibroblast | Stap1    |
| 0.00E+00 | 1.49 | 0.708 | 0.032 | 0.00E+00 | Fibroblast | Fyb      |
| 0.00E+00 | 1.49 | 0.61  | 0.023 | 0.00E+00 | Fibroblast | Pou2f2   |
| 0.00E+00 | 1.48 | 0.778 | 0.02  | 0.00E+00 | Fibroblast | Snx20    |
| 0.00E+00 | 1.47 | 0.819 | 0.102 | 0.00E+00 | Fibroblast | Dennd4a  |
| 0.00E+00 | 1.41 | 0.676 | 0.011 | 0.00E+00 | Fibroblast | Samsn1   |
| 0.00E+00 | 1.41 | 0.829 | 0.095 | 0.00E+00 | Fibroblast | Stk17b   |
| 0.00E+00 | 1.41 | 0.717 | 0.045 | 0.00E+00 | Fibroblast | Pldb1    |
| 0.00E+00 | 1.37 | 0.756 | 0.114 | 0.00E+00 | Fibroblast | Samhd1   |
| 0.00E+00 | 1.35 | 0.603 | 0.017 | 0.00E+00 | Fibroblast | Bcl2a1d  |
| 0.00E+00 | 1.34 | 0.768 | 0.096 | 0.00E+00 | Fibroblast | Tgfb1    |
| 0.00E+00 | 1.34 | 0.787 | 0.108 | 0.00E+00 | Fibroblast | Psmb8    |
| 0.00E+00 | 1.32 | 0.638 | 0.018 | 0.00E+00 | Fibroblast | Cd300a   |
| 0.00E+00 | 1.31 | 0.825 | 0.111 | 0.00E+00 | Fibroblast | Gmfg     |
| 0.00E+00 | 1.31 | 0.784 | 0.023 | 0.00E+00 | Fibroblast | Selplg   |
| 0.00E+00 | 1.30 | 0.67  | 0.019 | 0.00E+00 | Fibroblast | Pid1     |
| 0.00E+00 | 1.27 | 0.698 | 0.015 | 0.00E+00 | Fibroblast | Itgb2    |
| 0.00E+00 | 1.27 | 0.74  | 0.109 | 0.00E+00 | Fibroblast | Lyn      |
| 0.00E+00 | 1.27 | 0.813 | 0.129 | 0.00E+00 | Fibroblast | Fam49b   |
| 0.00E+00 | 1.26 | 0.746 | 0.027 | 0.00E+00 | Fibroblast | Rac2     |
| 0.00E+00 | 1.26 | 0.606 | 0.026 | 0.00E+00 | Fibroblast | Tlr2     |
| 0.00E+00 | 1.26 | 0.781 | 0.021 | 0.00E+00 | Fibroblast | Pld4     |
| 0.00E+00 | 1.24 | 0.651 | 0.028 | 0.00E+00 | Fibroblast | Ncf2     |
| 0.00E+00 | 1.15 | 0.702 | 0.015 | 0.00E+00 | Fibroblast | Gpr132   |
| 0.00E+00 | 1.15 | 0.619 | 0.012 | 0.00E+00 | Fibroblast | Csf2rb   |
| 0.00E+00 | 1.15 | 0.759 | 0.103 | 0.00E+00 | Fibroblast | Unc93b1  |
| 0.00E+00 | 1.14 | 0.644 | 0.025 | 0.00E+00 | Fibroblast | Tgfb1    |
| 0.00E+00 | 1.11 | 0.644 | 0.06  | 0.00E+00 | Fibroblast | Gm8995   |
| 0.00E+00 | 1.10 | 0.711 | 0.041 | 0.00E+00 | Fibroblast | Plekho2  |
| 0.00E+00 | 1.08 | 0.679 | 0.056 | 0.00E+00 | Fibroblast | Csf2ra   |
| 0.00E+00 | 1.08 | 0.66  | 0.017 | 0.00E+00 | Fibroblast | Pirb     |
| 0.00E+00 | 1.04 | 0.625 | 0.024 | 0.00E+00 | Fibroblast | Cd300c2  |
| 0.00E+00 | 1.03 | 0.711 | 0.039 | 0.00E+00 | Fibroblast | Tm6sf1   |
| 0.00E+00 | 1.01 | 0.635 | 0.037 | 0.00E+00 | Fibroblast | Cd68     |
| 0.00E+00 | 1.00 | 0.654 | 0.029 | 0.00E+00 | Fibroblast | Hcls1    |
| 0.00E+00 | 0.99 | 0.648 | 0.025 | 0.00E+00 | Fibroblast | Nrros    |
| 0.00E+00 | 0.98 | 0.648 | 0.05  | 0.00E+00 | Fibroblast | Agpat4   |
| 0.00E+00 | 0.96 | 0.667 | 0.074 | 0.00E+00 | Fibroblast | Celf2    |
| 0.00E+00 | 0.96 | 0.613 | 0.038 | 0.00E+00 | Fibroblast | Irf5     |
| 0.00E+00 | 0.94 | 0.629 | 0.024 | 0.00E+00 | Fibroblast | Cyth4    |
| 0.00E+00 | 0.94 | 0.603 | 0.023 | 0.00E+00 | Fibroblast | Ly86     |
| 0.00E+00 | 0.76 | 0.61  | 0.065 | 0.00E+00 | Fibroblast | Gpsm3    |



|           |      |       |       |           |            |          |
|-----------|------|-------|-------|-----------|------------|----------|
| 2.27E-301 | 1.17 | 0.689 | 0.092 | 7.02E-297 | Fibroblast | Flna     |
| 1.69E-289 | 1.33 | 0.762 | 0.12  | 5.23E-285 | Fibroblast | Adgre5   |
| 1.79E-264 | 1.04 | 0.61  | 0.081 | 5.55E-260 | Fibroblast | Tnfrsf3  |
| 9.39E-259 | 1.93 | 0.86  | 0.188 | 2.91E-254 | Fibroblast | Lgals3   |
| 4.97E-251 | 1.22 | 0.752 | 0.138 | 1.54E-246 | Fibroblast | Ptpn18   |
| 6.95E-242 | 2.16 | 0.676 | 0.12  | 2.15E-237 | Fibroblast | Plac8    |
| 5.43E-238 | 1.83 | 0.956 | 0.319 | 1.68E-233 | Fibroblast | Arpc1b   |
| 2.47E-229 | 0.82 | 0.648 | 0.101 | 7.65E-225 | Fibroblast | Cmtm7    |
| 1.82E-224 | 2.10 | 0.863 | 0.234 | 5.65E-220 | Fibroblast | Tmsb10   |
| 2.11E-220 | 1.26 | 0.794 | 0.188 | 6.54E-216 | Fibroblast | Efh2     |
| 1.93E-210 | 2.73 | 1     | 0.528 | 5.99E-206 | Fibroblast | Tmsb4x   |
| 6.73E-208 | 2.03 | 0.775 | 0.182 | 2.08E-203 | Fibroblast | Crip1    |
| 6.80E-193 | 1.04 | 0.733 | 0.16  | 2.11E-188 | Fibroblast | Lrrfip1  |
| 3.62E-191 | 2.00 | 0.984 | 0.529 | 1.12E-186 | Fibroblast | Btg1     |
| 1.54E-187 | 1.28 | 0.765 | 0.171 | 4.77E-183 | Fibroblast | Nr4a1    |
| 6.75E-183 | 1.60 | 0.956 | 0.42  | 2.09E-178 | Fibroblast | Sh3bgrl3 |
| 1.35E-182 | 1.56 | 0.886 | 0.325 | 4.17E-178 | Fibroblast | Kdm6b    |
| 1.98E-181 | 0.89 | 0.603 | 0.108 | 6.14E-177 | Fibroblast | Trf      |
| 8.89E-180 | 1.38 | 1     | 0.985 | 2.75E-175 | Fibroblast | Fau      |
| 1.60E-178 | 1.84 | 1     | 0.964 | 4.96E-174 | Fibroblast | Actb     |
| 2.51E-177 | 1.09 | 0.686 | 0.145 | 7.79E-173 | Fibroblast | Ctsc     |
| 1.76E-171 | 1.15 | 0.695 | 0.168 | 5.46E-167 | Fibroblast | Map4k4   |
| 2.12E-171 | 2.48 | 0.743 | 0.198 | 6.56E-167 | Fibroblast | Cd74     |
| 5.16E-170 | 1.40 | 0.994 | 0.967 | 1.60E-165 | Fibroblast | Rps9     |
| 2.88E-169 | 1.39 | 0.924 | 0.364 | 8.93E-165 | Fibroblast | Iqgap1   |
| 1.73E-167 | 1.66 | 0.997 | 0.624 | 5.36E-163 | Fibroblast | H2-D1    |
| 1.89E-166 | 1.52 | 0.99  | 0.635 | 5.87E-162 | Fibroblast | Mcl1     |
| 3.20E-166 | 0.88 | 0.616 | 0.128 | 9.92E-162 | Fibroblast | Rhog     |
| 1.53E-162 | 1.22 | 0.797 | 0.246 | 4.74E-158 | Fibroblast | Litaf    |
| 1.01E-158 | 1.89 | 0.917 | 0.417 | 3.14E-154 | Fibroblast | Ifitm2   |
| 6.11E-157 | 1.26 | 0.997 | 0.919 | 1.89E-152 | Fibroblast | H3f3a    |
| 6.69E-157 | 2.32 | 0.984 | 0.836 | 2.07E-152 | Fibroblast | Cst3     |
| 1.24E-156 | 0.95 | 0.638 | 0.152 | 3.86E-152 | Fibroblast | Gpcpd1   |
| 1.48E-156 | 1.02 | 0.727 | 0.172 | 4.59E-152 | Fibroblast | Anxa2    |
| 9.25E-155 | 1.13 | 0.806 | 0.275 | 2.86E-150 | Fibroblast | Ifngr1   |
| 1.08E-154 | 1.80 | 0.949 | 0.521 | 3.33E-150 | Fibroblast | Nfkbia   |
| 3.02E-154 | 1.09 | 0.676 | 0.176 | 9.36E-150 | Fibroblast | Nfkb1    |
| 1.98E-150 | 1.23 | 0.892 | 0.356 | 6.13E-146 | Fibroblast | Msn      |
| 1.71E-148 | 1.17 | 0.997 | 0.976 | 5.30E-144 | Fibroblast | Rps27a   |
| 1.19E-144 | 1.30 | 0.784 | 0.236 | 3.68E-140 | Fibroblast | Gadd45b  |
| 1.44E-144 | 1.40 | 0.978 | 0.668 | 4.46E-140 | Fibroblast | B2m      |
| 8.92E-144 | 1.16 | 0.994 | 0.972 | 2.76E-139 | Fibroblast | Rps16    |
| 1.26E-143 | 1.26 | 0.997 | 0.963 | 3.90E-139 | Fibroblast | Actg1    |
| 1.53E-139 | 1.15 | 0.978 | 0.828 | 4.74E-135 | Fibroblast | Pfn1     |
| 3.42E-139 | 1.20 | 0.962 | 0.757 | 1.06E-134 | Fibroblast | Arpc2    |
| 1.40E-134 | 1.12 | 0.987 | 0.944 | 4.34E-130 | Fibroblast | Rpl34    |
| 2.28E-130 | 0.97 | 1     | 0.976 | 7.06E-126 | Fibroblast | Rps27    |
| 3.63E-129 | 1.16 | 0.984 | 0.965 | 1.13E-124 | Fibroblast | Rpl18a   |
| 4.79E-129 | 1.24 | 0.603 | 0.162 | 1.48E-124 | Fibroblast | Malt1    |
| 6.28E-129 | 1.42 | 0.975 | 0.975 | 1.95E-124 | Fibroblast | Rps11    |
| 2.80E-128 | 1.21 | 0.908 | 0.462 | 8.68E-124 | Fibroblast | Ucp2     |
| 5.60E-128 | 1.32 | 0.959 | 0.695 | 1.73E-123 | Fibroblast | H2-K1    |
| 2.35E-127 | 1.62 | 0.771 | 0.304 | 7.27E-123 | Fibroblast | Nfkbiz   |
| 6.99E-127 | 1.18 | 0.968 | 0.979 | 2.16E-122 | Fibroblast | Rps24    |
| 4.13E-126 | 1.13 | 0.984 | 0.946 | 1.28E-121 | Fibroblast | Rpl17    |
| 4.14E-125 | 1.04 | 0.962 | 0.637 | 1.28E-120 | Fibroblast | Gnai2    |
| 6.03E-125 | 1.22 | 0.952 | 0.902 | 1.87E-120 | Fibroblast | Rpl18    |
| 9.24E-125 | 1.13 | 0.965 | 0.947 | 2.86E-120 | Fibroblast | Rps13    |
| 1.80E-124 | 1.31 | 0.914 | 0.548 | 5.57E-120 | Fibroblast | Rap1b    |
| 2.57E-124 | 0.96 | 0.813 | 0.297 | 7.96E-120 | Fibroblast | Ier5     |
| 9.30E-123 | 1.16 | 0.994 | 0.932 | 2.88E-118 | Fibroblast | H3f3b    |
| 1.74E-122 | 1.03 | 0.987 | 0.973 | 5.40E-118 | Fibroblast | Rps3a1   |
| 3.92E-122 | 0.99 | 0.978 | 0.964 | 1.21E-117 | Fibroblast | Rpl9     |
| 1.68E-121 | 0.99 | 0.746 | 0.272 | 5.19E-117 | Fibroblast | Skil     |

|           |      |       |       |           |            |          |
|-----------|------|-------|-------|-----------|------------|----------|
| 6.50E-121 | 1.38 | 0.952 | 0.951 | 2.01E-116 | Fibroblast | Rpsa     |
| 6.66E-121 | 1.02 | 0.959 | 0.798 | 2.06E-116 | Fibroblast | Cfl1     |
| 8.52E-121 | 1.09 | 0.94  | 0.716 | 2.64E-116 | Fibroblast | Arpc3    |
| 6.62E-120 | 0.97 | 0.978 | 0.976 | 2.05E-115 | Fibroblast | Rps14    |
| 4.23E-119 | 1.07 | 0.959 | 0.953 | 1.31E-114 | Fibroblast | Rps15a   |
| 3.74E-118 | 0.88 | 0.632 | 0.187 | 1.16E-113 | Fibroblast | Vasp     |
| 5.32E-118 | 1.15 | 0.978 | 0.961 | 1.65E-113 | Fibroblast | Rplp0    |
| 6.24E-118 | 1.11 | 0.971 | 0.956 | 1.93E-113 | Fibroblast | Rpl13    |
| 8.22E-118 | 1.09 | 0.975 | 0.959 | 2.55E-113 | Fibroblast | Rpl10    |
| 1.06E-117 | 0.90 | 0.648 | 0.179 | 3.27E-113 | Fibroblast | Trib1    |
| 1.60E-117 | 1.13 | 0.848 | 0.482 | 4.96E-113 | Fibroblast | Actr3    |
| 3.15E-116 | 1.00 | 0.975 | 0.975 | 9.77E-112 | Fibroblast | Rps12    |
| 3.18E-116 | 1.11 | 0.711 | 0.267 | 9.86E-112 | Fibroblast | Ptpn1    |
| 4.29E-115 | 1.17 | 0.962 | 0.908 | 1.33E-110 | Fibroblast | Rps7     |
| 9.11E-115 | 0.94 | 0.752 | 0.275 | 2.82E-110 | Fibroblast | Tpm4     |
| 2.52E-114 | 0.94 | 0.962 | 0.962 | 7.81E-110 | Fibroblast | Rplp2    |
| 1.76E-113 | 0.92 | 0.971 | 0.939 | 5.45E-109 | Fibroblast | Rpl30    |
| 2.72E-113 | 1.00 | 0.978 | 0.974 | 8.43E-109 | Fibroblast | Rpl19    |
| 1.15E-112 | 1.54 | 0.714 | 0.292 | 3.57E-108 | Fibroblast | Zeb2     |
| 1.77E-112 | 0.95 | 0.987 | 0.961 | 5.47E-108 | Fibroblast | Rpl8     |
| 4.06E-112 | 1.01 | 0.854 | 0.444 | 1.26E-107 | Fibroblast | Tpm3     |
| 2.69E-111 | 1.10 | 0.965 | 0.957 | 8.34E-107 | Fibroblast | Rps4x    |
| 4.60E-111 | 1.17 | 0.905 | 0.592 | 1.43E-106 | Fibroblast | Nfe2l2   |
| 1.10E-109 | 1.09 | 0.949 | 0.964 | 3.42E-105 | Fibroblast | Rps5     |
| 8.54E-109 | 0.86 | 0.994 | 0.99  | 2.65E-104 | Fibroblast | Rps29    |
| 2.74E-108 | 0.77 | 0.625 | 0.199 | 8.48E-104 | Fibroblast | Grk2     |
| 3.47E-108 | 1.34 | 0.603 | 0.167 | 1.07E-103 | Fibroblast | Tnfrsf2  |
| 8.70E-107 | 1.08 | 0.898 | 0.466 | 2.69E-102 | Fibroblast | Ly6e     |
| 3.41E-106 | 0.93 | 0.956 | 0.955 | 1.06E-101 | Fibroblast | Rps23    |
| 4.10E-106 | 1.42 | 0.87  | 0.514 | 1.27E-101 | Fibroblast | S100a11  |
| 4.83E-106 | 0.96 | 0.94  | 0.735 | 1.50E-101 | Fibroblast | Cdc42    |
| 7.76E-105 | 1.00 | 0.644 | 0.21  | 2.40E-100 | Fibroblast | Icam1    |
| 1.59E-104 | 0.97 | 0.981 | 0.946 | 4.91E-100 | Fibroblast | Rpl21    |
| 1.77E-104 | 0.97 | 0.94  | 0.929 | 5.49E-100 | Fibroblast | Rps19    |
| 5.86E-104 | 0.82 | 0.981 | 0.986 | 1.81E-99  | Fibroblast | Rps8     |
| 2.94E-102 | 0.97 | 0.971 | 0.958 | 9.12E-98  | Fibroblast | Rps3     |
| 1.17E-101 | 1.00 | 0.917 | 0.934 | 3.63E-97  | Fibroblast | Rack1    |
| 1.19E-101 | 1.19 | 0.879 | 0.698 | 3.68E-97  | Fibroblast | Sub1     |
| 1.48E-101 | 0.98 | 0.86  | 0.536 | 4.60E-97  | Fibroblast | Arpc5    |
| 2.17E-101 | 1.00 | 0.959 | 0.947 | 6.72E-97  | Fibroblast | Rps26    |
| 4.41E-101 | 1.00 | 0.898 | 0.59  | 1.37E-96  | Fibroblast | Clic1    |
| 5.48E-101 | 1.30 | 0.702 | 0.27  | 1.70E-96  | Fibroblast | Ahnak    |
| 1.91E-100 | 0.81 | 0.956 | 0.971 | 5.90E-96  | Fibroblast | Rpl35a   |
| 2.54E-100 | 0.81 | 0.994 | 0.981 | 7.86E-96  | Fibroblast | Rpl37    |
| 5.84E-100 | 0.86 | 0.733 | 0.297 | 1.81E-95  | Fibroblast | Tnfrsf1a |
| 1.36E-99  | 1.03 | 0.93  | 0.859 | 4.23E-95  | Fibroblast | Eef1b2   |
| 3.84E-99  | 0.94 | 0.975 | 0.97  | 1.19E-94  | Fibroblast | Rpl39    |
| 7.89E-98  | 0.79 | 1     | 0.99  | 2.44E-93  | Fibroblast | Rpl23    |
| 1.21E-97  | 1.40 | 0.902 | 0.785 | 3.73E-93  | Fibroblast | H2az1    |
| 1.92E-96  | 0.74 | 0.99  | 0.984 | 5.95E-92  | Fibroblast | Rpl37a   |
| 1.47E-95  | 1.02 | 0.943 | 0.978 | 4.54E-91  | Fibroblast | Rpl32    |
| 1.41E-94  | 0.99 | 0.825 | 0.463 | 4.38E-90  | Fibroblast | Tln1     |
| 2.26E-94  | 0.82 | 0.952 | 0.977 | 7.01E-90  | Fibroblast | Rpl26    |
| 4.09E-93  | 0.91 | 0.937 | 0.966 | 1.27E-88  | Fibroblast | Rps18    |
| 7.20E-93  | 1.14 | 0.883 | 0.62  | 2.23E-88  | Fibroblast | Gm2a     |
| 6.29E-92  | 0.64 | 1     | 0.996 | 1.95E-87  | Fibroblast | Tpt1     |
| 1.04E-91  | 0.83 | 0.962 | 0.973 | 3.23E-87  | Fibroblast | Rpl11    |
| 2.53E-91  | 0.96 | 0.717 | 0.277 | 7.85E-87  | Fibroblast | Cdkn1a   |
| 1.50E-90  | 0.98 | 0.908 | 0.743 | 4.64E-86  | Fibroblast | Rbm3     |
| 2.17E-90  | 0.91 | 0.927 | 0.858 | 6.71E-86  | Fibroblast | Rpl27a   |
| 3.36E-90  | 0.98 | 0.876 | 0.746 | 1.04E-85  | Fibroblast | Eif3f    |
| 6.15E-90  | 0.83 | 0.721 | 0.329 | 1.90E-85  | Fibroblast | Grb2     |
| 7.27E-90  | 0.88 | 0.898 | 0.772 | 2.25E-85  | Fibroblast | Pabpc1   |
| 3.16E-88  | 0.87 | 0.933 | 0.55  | 9.79E-84  | Fibroblast | Junb     |

|          |      |       |       |          |            |         |
|----------|------|-------|-------|----------|------------|---------|
| 4.35E-88 | 1.08 | 0.94  | 0.811 | 1.35E-83 | Fibroblast | Calm1   |
| 5.23E-88 | 0.78 | 0.956 | 0.92  | 1.62E-83 | Fibroblast | Rpl29   |
| 1.03E-87 | 0.87 | 0.946 | 0.976 | 3.18E-83 | Fibroblast | Rps20   |
| 3.08E-87 | 0.62 | 1     | 0.985 | 9.55E-83 | Fibroblast | Eif1    |
| 1.24E-86 | 0.80 | 0.644 | 0.203 | 3.85E-82 | Fibroblast | Socs3   |
| 2.09E-86 | 0.87 | 0.695 | 0.314 | 6.47E-82 | Fibroblast | Zyx     |
| 4.41E-86 | 0.96 | 0.889 | 0.769 | 1.36E-81 | Fibroblast | Rps10   |
| 6.55E-86 | 0.76 | 0.632 | 0.238 | 2.03E-81 | Fibroblast | Bcl10   |
| 7.73E-86 | 0.85 | 0.857 | 0.491 | 2.40E-81 | Fibroblast | Ccn1    |
| 8.21E-86 | 0.85 | 0.622 | 0.211 | 2.54E-81 | Fibroblast | Kctd12  |
| 1.01E-85 | 0.93 | 0.851 | 0.595 | 3.13E-81 | Fibroblast | Capzb   |
| 1.67E-85 | 0.81 | 0.937 | 0.48  | 5.17E-81 | Fibroblast | Btg2    |
| 1.68E-85 | 0.61 | 0.717 | 0.247 | 5.20E-81 | Fibroblast | Klf2    |
| 2.01E-85 | 0.99 | 0.937 | 0.916 | 6.23E-81 | Fibroblast | Rpl3    |
| 1.32E-84 | 0.78 | 0.952 | 0.966 | 4.09E-80 | Fibroblast | Rpl6    |
| 1.47E-84 | 0.83 | 0.654 | 0.261 | 4.55E-80 | Fibroblast | Jpt1    |
| 1.66E-83 | 0.88 | 0.794 | 0.461 | 5.14E-79 | Fibroblast | Pitpna  |
| 3.56E-83 | 0.79 | 0.911 | 0.874 | 1.10E-78 | Fibroblast | Rpl4    |
| 3.95E-82 | 0.80 | 0.99  | 0.988 | 1.22E-77 | Fibroblast | Rplp1   |
| 6.28E-81 | 0.87 | 0.841 | 0.533 | 1.94E-76 | Fibroblast | Cd47    |
| 1.63E-80 | 1.24 | 0.752 | 0.418 | 5.05E-76 | Fibroblast | Cdk2ap2 |
| 1.82E-80 | 1.05 | 0.905 | 0.897 | 5.64E-76 | Fibroblast | Rpl12   |
| 2.55E-78 | 0.99 | 0.73  | 0.354 | 7.90E-74 | Fibroblast | lfrd1   |
| 1.08E-77 | 1.15 | 0.841 | 0.667 | 3.36E-73 | Fibroblast | Npc2    |
| 1.26E-76 | 0.78 | 0.914 | 0.902 | 3.89E-72 | Fibroblast | Rpl7    |
| 4.54E-76 | 0.82 | 0.644 | 0.277 | 1.41E-71 | Fibroblast | Ikbkb   |
| 5.49E-75 | 0.76 | 0.943 | 0.94  | 1.70E-70 | Fibroblast | Rpl22   |
| 2.39E-74 | 0.98 | 0.721 | 0.362 | 7.40E-70 | Fibroblast | Dleu2   |
| 7.34E-74 | 0.67 | 0.946 | 0.962 | 2.27E-69 | Fibroblast | Rps15   |
| 1.06E-73 | 2.09 | 0.784 | 0.575 | 3.28E-69 | Fibroblast | Cebpb   |
| 4.66E-73 | 1.43 | 0.714 | 0.427 | 1.44E-68 | Fibroblast | Ifi30   |
| 1.73E-72 | 0.93 | 0.686 | 0.323 | 5.35E-68 | Fibroblast | Klf13   |
| 1.90E-70 | 0.79 | 0.905 | 0.915 | 5.88E-66 | Fibroblast | Rpl10a  |
| 2.09E-70 | 0.73 | 0.603 | 0.252 | 6.47E-66 | Fibroblast | Kdm7a   |
| 2.95E-70 | 0.88 | 0.857 | 0.775 | 9.14E-66 | Fibroblast | Rps6    |
| 4.99E-70 | 0.82 | 0.968 | 0.852 | 1.55E-65 | Fibroblast | Jund    |
| 7.62E-70 | 0.71 | 0.689 | 0.301 | 2.36E-65 | Fibroblast | Tsc22d3 |
| 1.57E-69 | 0.77 | 0.705 | 0.355 | 4.87E-65 | Fibroblast | Akap13  |
| 4.07E-68 | 0.81 | 0.794 | 0.494 | 1.26E-63 | Fibroblast | Rap1a   |
| 7.73E-68 | 0.70 | 0.93  | 0.939 | 2.39E-63 | Fibroblast | Rps28   |
| 1.26E-67 | 0.84 | 0.844 | 0.685 | 3.89E-63 | Fibroblast | Sec61b  |
| 1.69E-67 | 0.64 | 0.978 | 0.982 | 5.23E-63 | Fibroblast | Rpl28   |
| 2.02E-67 | 0.80 | 0.721 | 0.404 | 6.24E-63 | Fibroblast | Tmed5   |
| 5.15E-67 | 0.65 | 0.946 | 0.922 | 1.60E-62 | Fibroblast | Rps25   |
| 1.71E-66 | 0.70 | 0.924 | 0.924 | 5.30E-62 | Fibroblast | Rpl35   |
| 4.38E-66 | 1.05 | 0.778 | 0.539 | 1.36E-61 | Fibroblast | Tpd52   |
| 1.53E-65 | 0.65 | 0.93  | 0.838 | 4.73E-61 | Fibroblast | Sem1    |
| 2.28E-65 | 0.85 | 0.892 | 0.739 | 7.07E-61 | Fibroblast | Taldo1  |
| 9.19E-65 | 0.58 | 0.968 | 0.985 | 2.85E-60 | Fibroblast | Rps21   |
| 3.11E-64 | 0.73 | 0.825 | 0.551 | 9.64E-60 | Fibroblast | Cotl1   |
| 2.52E-63 | 0.58 | 0.975 | 0.977 | 7.82E-59 | Fibroblast | Rpl38   |
| 9.97E-63 | 1.01 | 0.768 | 0.517 | 3.09E-58 | Fibroblast | Atp2b1  |
| 1.48E-62 | 0.71 | 0.895 | 0.825 | 4.58E-58 | Fibroblast | Rpl23a  |
| 3.70E-62 | 0.64 | 0.937 | 0.819 | 1.15E-57 | Fibroblast | Rhoa    |
| 9.93E-61 | 0.68 | 0.876 | 0.808 | 3.08E-56 | Fibroblast | Rpl27   |
| 9.99E-61 | 0.82 | 0.952 | 0.922 | 3.10E-56 | Fibroblast | Psap    |
| 1.15E-60 | 0.67 | 0.613 | 0.27  | 3.57E-56 | Fibroblast | Clec2d  |
| 1.94E-60 | 0.65 | 0.654 | 0.334 | 6.02E-56 | Fibroblast | Skap2   |
| 8.66E-60 | 0.52 | 0.997 | 0.997 | 2.68E-55 | Fibroblast | Eef1a1  |
| 9.36E-59 | 0.55 | 0.946 | 0.973 | 2.90E-54 | Fibroblast | Rpl36   |
| 1.90E-58 | 0.72 | 0.819 | 0.607 | 5.90E-54 | Fibroblast | Capza2  |
| 2.96E-58 | 0.79 | 0.825 | 0.589 | 9.16E-54 | Fibroblast | Ctsz    |
| 3.63E-58 | 0.71 | 0.933 | 0.947 | 1.12E-53 | Fibroblast | Rpl14   |
| 5.69E-58 | 0.68 | 0.797 | 0.432 | 1.76E-53 | Fibroblast | Ier2    |

|          |      |       |       |          |            |           |
|----------|------|-------|-------|----------|------------|-----------|
| 8.33E-58 | 0.61 | 0.892 | 0.89  | 2.58E-53 | Fibroblast | Btf3      |
| 1.24E-57 | 0.74 | 0.822 | 0.621 | 3.84E-53 | Fibroblast | Picalm    |
| 5.06E-57 | 0.82 | 0.886 | 0.615 | 1.57E-52 | Fibroblast | Dusp1     |
| 9.95E-57 | 0.62 | 0.898 | 0.816 | 3.08E-52 | Fibroblast | Eif4a1    |
| 3.70E-56 | 0.65 | 0.851 | 0.705 | 1.15E-51 | Fibroblast | Arf5      |
| 4.06E-56 | 0.55 | 0.975 | 0.905 | 1.26E-51 | Fibroblast | Ddx5      |
| 2.09E-55 | 0.73 | 0.746 | 0.441 | 6.47E-51 | Fibroblast | Ankrd11   |
| 2.13E-55 | 0.67 | 0.629 | 0.333 | 6.58E-51 | Fibroblast | Kpna4     |
| 4.08E-55 | 0.86 | 0.752 | 0.479 | 1.26E-50 | Fibroblast | Prr13     |
| 4.45E-55 | 0.85 | 0.711 | 0.446 | 1.38E-50 | Fibroblast | Psme1     |
| 2.31E-54 | 0.62 | 0.857 | 0.649 | 7.15E-50 | Fibroblast | Sh3glb1   |
| 2.40E-54 | 0.71 | 0.829 | 0.732 | 7.43E-50 | Fibroblast | Rpl15     |
| 5.19E-54 | 0.68 | 0.883 | 0.868 | 1.61E-49 | Fibroblast | Rpl5      |
| 5.93E-54 | 0.72 | 0.781 | 0.621 | 1.84E-49 | Fibroblast | Nsa2      |
| 1.48E-53 | 0.72 | 0.717 | 0.471 | 4.58E-49 | Fibroblast | Mbn1      |
| 4.15E-53 | 0.71 | 0.651 | 0.353 | 1.29E-48 | Fibroblast | Atp1b3    |
| 4.31E-53 | 0.70 | 0.867 | 0.588 | 1.33E-48 | Fibroblast | Zfp36     |
| 5.19E-53 | 0.70 | 0.759 | 0.532 | 1.61E-48 | Fibroblast | Man2b1    |
| 5.33E-52 | 0.66 | 0.692 | 0.38  | 1.65E-47 | Fibroblast | Stat3     |
| 6.91E-52 | 0.64 | 0.879 | 0.836 | 2.14E-47 | Fibroblast | Rpl24     |
| 3.99E-51 | 0.56 | 0.743 | 0.439 | 1.23E-46 | Fibroblast | Tmem50a   |
| 5.50E-51 | 0.69 | 0.781 | 0.622 | 1.70E-46 | Fibroblast | Erp29     |
| 7.87E-51 | 0.64 | 0.708 | 0.436 | 2.44E-46 | Fibroblast | Shisa5    |
| 9.40E-51 | 0.78 | 0.632 | 0.363 | 2.91E-46 | Fibroblast | Rilpl2    |
| 2.11E-50 | 0.65 | 0.644 | 0.378 | 6.54E-46 | Fibroblast | Sec11c    |
| 3.38E-50 | 0.98 | 0.762 | 0.556 | 1.05E-45 | Fibroblast | Tagln2    |
| 7.56E-50 | 0.57 | 0.93  | 0.935 | 2.34E-45 | Fibroblast | Rpl7a     |
| 1.19E-49 | 0.75 | 0.73  | 0.494 | 3.67E-45 | Fibroblast | Mapkapk2  |
| 3.19E-49 | 0.56 | 0.603 | 0.305 | 9.87E-45 | Fibroblast | Sh3bgrl   |
| 5.91E-49 | 0.65 | 0.629 | 0.35  | 1.83E-44 | Fibroblast | Map2k3    |
| 1.17E-48 | 0.85 | 0.673 | 0.438 | 3.63E-44 | Fibroblast | Ehd1      |
| 1.70E-48 | 0.67 | 0.622 | 0.334 | 5.25E-44 | Fibroblast | H2-T23    |
| 5.53E-48 | 0.62 | 0.775 | 0.534 | 1.71E-43 | Fibroblast | Ostf1     |
| 7.86E-48 | 0.52 | 0.975 | 0.98  | 2.43E-43 | Fibroblast | Rps2      |
| 1.03E-46 | 0.51 | 0.883 | 0.751 | 3.21E-42 | Fibroblast | Gnb2      |
| 7.80E-46 | 0.66 | 0.635 | 0.36  | 2.42E-41 | Fibroblast | Kras      |
| 9.28E-46 | 0.62 | 0.698 | 0.44  | 2.88E-41 | Fibroblast | Myl12b    |
| 1.15E-45 | 0.64 | 0.714 | 0.496 | 3.56E-41 | Fibroblast | Ccdc12    |
| 2.53E-45 | 0.60 | 0.8   | 0.624 | 7.83E-41 | Fibroblast | Srsf3     |
| 1.20E-44 | 0.57 | 0.819 | 0.708 | 3.72E-40 | Fibroblast | Ssr4      |
| 2.44E-44 | 0.74 | 0.67  | 0.454 | 7.54E-40 | Fibroblast | Syng2     |
| 4.29E-44 | 0.76 | 0.756 | 0.58  | 1.33E-39 | Fibroblast | Ctsh      |
| 1.59E-43 | 0.56 | 0.616 | 0.355 | 4.94E-39 | Fibroblast | Arcp4     |
| 1.63E-43 | 0.63 | 0.644 | 0.379 | 5.05E-39 | Fibroblast | Trps1     |
| 2.31E-43 | 0.58 | 0.902 | 0.769 | 7.15E-39 | Fibroblast | Hspa5     |
| 3.52E-43 | 0.58 | 0.746 | 0.565 | 1.09E-38 | Fibroblast | Rpl13a    |
| 1.26E-42 | 0.60 | 0.784 | 0.632 | 3.90E-38 | Fibroblast | Serp1     |
| 6.74E-42 | 0.64 | 0.721 | 0.464 | 2.09E-37 | Fibroblast | Hmgb2     |
| 7.64E-42 | 0.58 | 0.73  | 0.507 | 2.37E-37 | Fibroblast | Chmp4b    |
| 1.01E-41 | 0.58 | 0.81  | 0.75  | 3.13E-37 | Fibroblast | Eif3h     |
| 2.38E-40 | 0.54 | 0.851 | 0.731 | 7.36E-36 | Fibroblast | Hnrnpf    |
| 3.13E-40 | 0.68 | 0.711 | 0.59  | 9.71E-36 | Fibroblast | Macroh2a1 |
| 4.44E-40 | 0.54 | 0.705 | 0.43  | 1.37E-35 | Fibroblast | Anxa5     |
| 5.36E-40 | 0.51 | 0.99  | 0.832 | 1.66E-35 | Fibroblast | Cyba      |
| 6.60E-39 | 0.51 | 0.778 | 0.552 | 2.04E-34 | Fibroblast | Srsf7     |
| 1.05E-38 | 0.60 | 0.622 | 0.394 | 3.25E-34 | Fibroblast | Psme2     |
| 1.21E-38 | 0.79 | 0.794 | 0.627 | 3.73E-34 | Fibroblast | Mrp133    |
| 4.37E-38 | 0.53 | 0.638 | 0.366 | 1.35E-33 | Fibroblast | Rbms1     |
| 1.81E-37 | 0.56 | 0.702 | 0.508 | 5.62E-33 | Fibroblast | Actr2     |
| 2.55E-37 | 0.58 | 0.663 | 0.413 | 7.90E-33 | Fibroblast | Myh9      |
| 8.19E-37 | 0.70 | 0.632 | 0.406 | 2.54E-32 | Fibroblast | Nadk      |
| 8.42E-37 | 0.51 | 0.717 | 0.453 | 2.61E-32 | Fibroblast | Tra2a     |
| 1.28E-36 | 0.78 | 0.698 | 0.415 | 3.98E-32 | Fibroblast | Ier3      |
| 6.37E-36 | 0.61 | 0.724 | 0.577 | 1.97E-31 | Fibroblast | Spag9     |

|           |      |       |       |           |            |             |
|-----------|------|-------|-------|-----------|------------|-------------|
| 3.06E-35  | 0.54 | 0.644 | 0.429 | 9.48E-31  | Fibroblast | Rnf130      |
| 1.28E-33  | 0.50 | 0.673 | 0.45  | 3.97E-29  | Fibroblast | Ptbp3       |
| 5.84E-32  | 0.56 | 0.686 | 0.516 | 1.81E-27  | Fibroblast | Sdcbp       |
| 6.25E-32  | 0.61 | 0.759 | 0.584 | 1.94E-27  | Fibroblast | Zfand5      |
| 1.26E-31  | 0.53 | 0.749 | 0.652 | 3.89E-27  | Fibroblast | Eif3e       |
| 7.96E-31  | 0.55 | 0.644 | 0.456 | 2.47E-26  | Fibroblast | Pak2        |
| 8.71E-31  | 0.55 | 0.698 | 0.501 | 2.70E-26  | Fibroblast | Ndel1       |
| 1.96E-30  | 0.52 | 0.689 | 0.546 | 6.06E-26  | Fibroblast | Snrpg       |
| 2.46E-26  | 0.53 | 0.61  | 0.436 | 7.63E-22  | Fibroblast | Mycbp2      |
| 4.92E-26  | 0.61 | 0.743 | 0.664 | 1.53E-21  | Fibroblast | 410006H16Ri |
| 2.66E-25  | 0.52 | 0.749 | 0.649 | 8.23E-21  | Fibroblast | Top1        |
| 6.37E-25  | 0.56 | 0.616 | 0.386 | 1.97E-20  | Fibroblast | Cd9         |
| 1.44E-24  | 0.74 | 0.635 | 0.507 | 4.47E-20  | Fibroblast | Zfp36l2     |
| 5.38E-23  | 0.50 | 0.689 | 0.602 | 1.67E-18  | Fibroblast | Rpl36al     |
| 2.44E-12  | 0.57 | 0.848 | 0.827 | 7.57E-08  | Fibroblast | Sat1        |
| 9.20E-12  | 0.83 | 0.73  | 0.731 | 2.85E-07  | Fibroblast | Msrb1       |
| 1.32E-11  | 1.29 | 0.622 | 0.589 | 4.09E-07  | Fibroblast | Apoe        |
| 8.67E-11  | 0.69 | 0.597 | 0.622 | 2.69E-06  | Fibroblast | Gsr         |
| 0.00E+00  | 2.41 | 0.934 | 0.047 | 0.00E+00  | Lymphocyte | Cd52        |
| 0.00E+00  | 1.82 | 0.78  | 0.028 | 0.00E+00  | Lymphocyte | Rac2        |
| 0.00E+00  | 1.79 | 0.788 | 0.056 | 0.00E+00  | Lymphocyte | Arhgdib     |
| 0.00E+00  | 1.76 | 0.74  | 0.045 | 0.00E+00  | Lymphocyte | Ptprc       |
| 0.00E+00  | 1.76 | 0.846 | 0.039 | 0.00E+00  | Lymphocyte | Coro1a      |
| 0.00E+00  | 1.67 | 0.791 | 0.097 | 0.00E+00  | Lymphocyte | Stk17b      |
| 0.00E+00  | 1.57 | 0.923 | 0.131 | 0.00E+00  | Lymphocyte | Srgn        |
| 0.00E+00  | 1.50 | 0.777 | 0.04  | 0.00E+00  | Lymphocyte | Laptm5      |
| 0.00E+00  | 1.47 | 0.667 | 0.072 | 0.00E+00  | Lymphocyte | Ets1        |
| 0.00E+00  | 1.41 | 0.626 | 0.032 | 0.00E+00  | Lymphocyte | Arhgap45    |
| 0.00E+00  | 1.32 | 0.63  | 0.03  | 0.00E+00  | Lymphocyte | Cd53        |
| 1.80E-288 | 1.75 | 0.832 | 0.138 | 5.56E-284 | Lymphocyte | Ptpn18      |
| 8.79E-283 | 1.73 | 0.733 | 0.104 | 2.72E-278 | Lymphocyte | Dennd4a     |
| 3.21E-267 | 2.59 | 0.967 | 0.234 | 9.96E-263 | Lymphocyte | Tmsb10      |
| 3.98E-265 | 2.45 | 0.824 | 0.155 | 1.23E-260 | Lymphocyte | Vps37b      |
| 2.63E-236 | 1.22 | 0.634 | 0.079 | 8.14E-232 | Lymphocyte | Gimap6      |
| 2.47E-226 | 1.30 | 0.7   | 0.11  | 7.65E-222 | Lymphocyte | Psmb8       |
| 1.09E-222 | 1.44 | 0.755 | 0.138 | 3.38E-218 | Lymphocyte | Cytip       |
| 1.72E-203 | 1.14 | 0.711 | 0.111 | 5.34E-199 | Lymphocyte | Fxyd5       |
| 2.37E-202 | 1.42 | 0.733 | 0.137 | 7.35E-198 | Lymphocyte | H2-Q7       |
| 1.11E-151 | 2.01 | 1     | 0.529 | 3.44E-147 | Lymphocyte | Tmsb4x      |
| 1.28E-150 | 1.68 | 1     | 0.979 | 3.98E-146 | Lymphocyte | Rps24       |
| 2.01E-143 | 1.44 | 0.996 | 0.972 | 6.23E-139 | Lymphocyte | Rps16       |
| 2.19E-143 | 1.59 | 0.996 | 0.953 | 6.78E-139 | Lymphocyte | Rps15a      |
| 3.20E-143 | 1.61 | 1     | 0.95  | 9.91E-139 | Lymphocyte | Rpsa        |
| 1.94E-142 | 1.46 | 0.996 | 0.946 | 6.02E-138 | Lymphocyte | Rps13       |
| 6.84E-142 | 1.46 | 1     | 0.965 | 2.12E-137 | Lymphocyte | Rpl18a      |
| 3.39E-138 | 1.39 | 1     | 0.956 | 1.05E-133 | Lymphocyte | Rpl13       |
| 8.28E-138 | 1.79 | 0.989 | 0.896 | 2.57E-133 | Lymphocyte | Rpl12       |
| 2.23E-137 | 1.54 | 1     | 0.976 | 6.92E-133 | Lymphocyte | Rps27       |
| 3.02E-137 | 1.32 | 1     | 0.973 | 9.35E-133 | Lymphocyte | Rpl19       |
| 1.15E-135 | 1.44 | 0.996 | 0.907 | 3.56E-131 | Lymphocyte | Rps7        |
| 1.67E-135 | 1.31 | 0.993 | 0.974 | 5.18E-131 | Lymphocyte | Rps11       |
| 1.91E-135 | 1.20 | 0.996 | 0.978 | 5.91E-131 | Lymphocyte | Rpl32       |
| 2.55E-135 | 1.29 | 0.993 | 0.944 | 7.90E-131 | Lymphocyte | Rpl34       |
| 2.91E-134 | 1.37 | 0.989 | 0.902 | 9.03E-130 | Lymphocyte | Rpl18       |
| 1.23E-133 | 1.40 | 0.996 | 0.946 | 3.80E-129 | Lymphocyte | Rpl17       |
| 8.90E-133 | 1.27 | 0.996 | 0.957 | 2.76E-128 | Lymphocyte | Rps3        |
| 1.13E-132 | 1.76 | 0.982 | 0.695 | 3.51E-128 | Lymphocyte | H2-K1       |
| 2.17E-132 | 1.31 | 0.996 | 0.985 | 6.72E-128 | Lymphocyte | Fau         |
| 1.03E-131 | 1.28 | 1     | 0.973 | 3.19E-127 | Lymphocyte | Rps3a1      |
| 1.46E-131 | 1.20 | 0.996 | 0.976 | 4.52E-127 | Lymphocyte | Rps14       |
| 1.91E-131 | 1.29 | 1     | 0.956 | 5.93E-127 | Lymphocyte | Rps4x       |
| 1.57E-130 | 1.19 | 1     | 0.966 | 4.86E-126 | Lymphocyte | Rps18       |
| 8.16E-129 | 1.16 | 0.711 | 0.184 | 2.53E-124 | Lymphocyte | Crip1       |
| 4.31E-127 | 1.24 | 0.993 | 0.961 | 1.34E-122 | Lymphocyte | Rplp2       |

|           |      |       |       |           |            |          |
|-----------|------|-------|-------|-----------|------------|----------|
| 1.39E-126 | 1.26 | 0.996 | 0.961 | 4.32E-122 | Lymphocyte | Rpl8     |
| 2.53E-126 | 1.34 | 0.996 | 0.946 | 7.85E-122 | Lymphocyte | Rpl21    |
| 4.53E-124 | 1.29 | 1     | 0.964 | 1.40E-119 | Lymphocyte | Rps5     |
| 6.89E-124 | 1.21 | 0.993 | 0.964 | 2.13E-119 | Lymphocyte | Rpl9     |
| 7.65E-124 | 1.30 | 1     | 0.975 | 2.37E-119 | Lymphocyte | Rps20    |
| 1.50E-123 | 1.46 | 0.978 | 0.624 | 4.63E-119 | Lymphocyte | H2-D1    |
| 1.22E-122 | 1.10 | 0.996 | 0.988 | 3.78E-118 | Lymphocyte | Rplp1    |
| 3.09E-118 | 1.12 | 0.989 | 0.955 | 9.57E-114 | Lymphocyte | Rps23    |
| 1.90E-117 | 1.21 | 1     | 0.967 | 5.89E-113 | Lymphocyte | Rps9     |
| 1.57E-116 | 1.50 | 0.853 | 0.435 | 4.85E-112 | Lymphocyte | Shisa5   |
| 8.16E-115 | 0.99 | 0.996 | 0.976 | 2.53E-110 | Lymphocyte | Rps27a   |
| 4.00E-111 | 1.16 | 0.989 | 0.939 | 1.24E-106 | Lymphocyte | Rpl30    |
| 2.51E-110 | 1.18 | 1     | 0.97  | 7.79E-106 | Lymphocyte | Rpl39    |
| 2.93E-110 | 0.99 | 0.996 | 0.99  | 9.08E-106 | Lymphocyte | Rpl23    |
| 4.85E-110 | 0.96 | 1     | 0.973 | 1.50E-105 | Lymphocyte | Rpl11    |
| 5.59E-109 | 1.12 | 0.993 | 0.934 | 1.73E-104 | Lymphocyte | Rack1    |
| 6.42E-108 | 1.26 | 0.956 | 0.668 | 1.99E-103 | Lymphocyte | B2m      |
| 1.35E-106 | 1.06 | 0.996 | 0.975 | 4.17E-102 | Lymphocyte | Rps12    |
| 1.57E-106 | 1.01 | 0.993 | 0.984 | 4.87E-102 | Lymphocyte | Rpl37a   |
| 1.70E-106 | 0.96 | 0.996 | 0.986 | 5.27E-102 | Lymphocyte | Rps8     |
| 4.48E-106 | 1.09 | 0.996 | 0.961 | 1.39E-101 | Lymphocyte | Rplp0    |
| 4.89E-106 | 1.14 | 0.996 | 0.915 | 1.51E-101 | Lymphocyte | Rpl3     |
| 5.09E-106 | 0.80 | 1     | 0.996 | 1.58E-101 | Lymphocyte | Tpt1     |
| 1.02E-105 | 1.27 | 0.894 | 0.422 | 3.15E-101 | Lymphocyte | Sh3bgrl3 |
| 1.35E-104 | 0.96 | 1     | 0.946 | 4.19E-100 | Lymphocyte | Rpl14    |
| 1.78E-102 | 1.09 | 0.989 | 0.946 | 5.53E-98  | Lymphocyte | Rps26    |
| 1.69E-101 | 0.85 | 1     | 0.971 | 5.24E-97  | Lymphocyte | Rpl35a   |
| 2.26E-101 | 0.97 | 1     | 0.985 | 7.01E-97  | Lymphocyte | Rps21    |
| 1.34E-99  | 1.08 | 0.967 | 0.857 | 4.14E-95  | Lymphocyte | Rpl27a   |
| 5.07E-98  | 1.45 | 0.89  | 0.53  | 1.57E-93  | Lymphocyte | Btg1     |
| 7.35E-97  | 0.90 | 0.996 | 0.966 | 2.28E-92  | Lymphocyte | Rpl6     |
| 7.23E-96  | 0.94 | 1     | 0.99  | 2.24E-91  | Lymphocyte | Rps29    |
| 9.81E-96  | 0.88 | 0.996 | 0.977 | 3.04E-91  | Lymphocyte | Rpl38    |
| 1.26E-95  | 1.06 | 0.96  | 0.867 | 3.90E-91  | Lymphocyte | Rpl5     |
| 7.53E-95  | 1.21 | 0.974 | 0.929 | 2.33E-90  | Lymphocyte | Rps19    |
| 1.77E-94  | 0.88 | 0.993 | 0.972 | 5.47E-90  | Lymphocyte | Rpl36    |
| 5.50E-93  | 0.85 | 0.985 | 0.977 | 1.70E-88  | Lymphocyte | Rpl26    |
| 6.45E-93  | 0.92 | 1     | 0.961 | 2.00E-88  | Lymphocyte | Rps15    |
| 3.19E-92  | 1.04 | 0.982 | 0.901 | 9.88E-88  | Lymphocyte | Rpl7     |
| 4.01E-92  | 0.96 | 0.982 | 0.92  | 1.24E-87  | Lymphocyte | Rpl29    |
| 9.02E-92  | 0.97 | 0.996 | 0.932 | 2.80E-87  | Lymphocyte | H3f3b    |
| 3.30E-89  | 1.10 | 1     | 0.964 | 1.02E-84  | Lymphocyte | Actb     |
| 5.99E-88  | 1.74 | 0.674 | 0.277 | 1.85E-83  | Lymphocyte | Ifngr1   |
| 1.20E-87  | 1.20 | 0.916 | 0.769 | 3.72E-83  | Lymphocyte | Rps10    |
| 4.92E-86  | 0.87 | 0.985 | 0.939 | 1.52E-81  | Lymphocyte | Rpl22    |
| 3.49E-84  | 0.83 | 0.996 | 0.981 | 1.08E-79  | Lymphocyte | Rpl37    |
| 3.72E-83  | 0.67 | 1     | 0.997 | 1.15E-78  | Lymphocyte | Eef1a1   |
| 2.05E-82  | 0.82 | 0.993 | 0.959 | 6.34E-78  | Lymphocyte | Rpl10    |
| 3.75E-82  | 0.97 | 0.952 | 0.859 | 1.16E-77  | Lymphocyte | Eef1b2   |
| 2.34E-81  | 1.21 | 0.861 | 0.468 | 7.26E-77  | Lymphocyte | Ly6e     |
| 1.97E-80  | 1.03 | 0.747 | 0.322 | 6.12E-76  | Lymphocyte | Arpc1b   |
| 3.51E-80  | 1.29 | 0.875 | 0.699 | 1.09E-75  | Lymphocyte | Sub1     |
| 1.94E-79  | 0.92 | 0.967 | 0.914 | 5.99E-75  | Lymphocyte | Rpl10a   |
| 2.46E-78  | 0.90 | 0.967 | 0.918 | 7.62E-74  | Lymphocyte | Rpl36a   |
| 3.62E-78  | 1.07 | 0.919 | 0.829 | 1.12E-73  | Lymphocyte | Pfn1     |
| 1.42E-77  | 1.15 | 0.703 | 0.301 | 4.39E-73  | Lymphocyte | Tsc22d3  |
| 4.12E-76  | 1.01 | 0.908 | 0.808 | 1.28E-71  | Lymphocyte | Rpl27    |
| 7.81E-75  | 1.01 | 0.89  | 0.775 | 2.42E-70  | Lymphocyte | Rps6     |
| 6.43E-74  | 0.68 | 0.996 | 0.985 | 1.99E-69  | Lymphocyte | Eif1     |
| 4.97E-71  | 0.88 | 0.93  | 0.873 | 1.54E-66  | Lymphocyte | Rpl4     |
| 7.87E-71  | 0.88 | 0.945 | 0.923 | 2.44E-66  | Lymphocyte | Rpl35    |
| 2.65E-67  | 0.90 | 0.908 | 0.799 | 8.22E-63  | Lymphocyte | Cfl1     |
| 3.00E-66  | 0.98 | 0.875 | 0.746 | 9.30E-62  | Lymphocyte | Eif3f    |
| 1.41E-62  | 0.98 | 0.883 | 0.722 | 4.37E-58  | Lymphocyte | Pnrc1    |

|          |      |       |       |          |            |         |
|----------|------|-------|-------|----------|------------|---------|
| 1.75E-62 | 1.08 | 0.747 | 0.471 | 5.42E-58 | Lymphocyte | Mbnl1   |
| 3.56E-62 | 0.88 | 0.908 | 0.825 | 1.10E-57 | Lymphocyte | Rpl23a  |
| 4.27E-62 | 0.73 | 0.967 | 0.921 | 1.32E-57 | Lymphocyte | Rps25   |
| 1.54E-57 | 0.62 | 1     | 0.98  | 4.76E-53 | Lymphocyte | Rps2    |
| 1.72E-57 | 0.72 | 0.982 | 0.938 | 5.33E-53 | Lymphocyte | Rps28   |
| 9.96E-56 | 0.92 | 0.868 | 0.482 | 3.09E-51 | Lymphocyte | Btg2    |
| 7.52E-55 | 0.76 | 0.883 | 0.773 | 2.33E-50 | Lymphocyte | Pabpc1  |
| 1.06E-54 | 0.57 | 1     | 0.982 | 3.29E-50 | Lymphocyte | Rpl28   |
| 4.68E-53 | 1.00 | 0.945 | 0.852 | 1.45E-48 | Lymphocyte | Jund    |
| 1.34E-52 | 0.96 | 0.758 | 0.565 | 4.16E-48 | Lymphocyte | Rpl13a  |
| 9.62E-52 | 0.83 | 0.945 | 0.92  | 2.98E-47 | Lymphocyte | H3f3a   |
| 2.42E-46 | 0.60 | 0.934 | 0.889 | 7.50E-42 | Lymphocyte | Btf3    |
| 7.26E-45 | 1.08 | 0.817 | 0.552 | 2.25E-40 | Lymphocyte | Junb    |
| 9.69E-45 | 0.69 | 0.883 | 0.804 | 3.00E-40 | Lymphocyte | Rbm39   |
| 2.65E-44 | 0.74 | 0.828 | 0.732 | 8.21E-40 | Lymphocyte | Rpl15   |
| 9.14E-44 | 0.55 | 0.945 | 0.935 | 2.83E-39 | Lymphocyte | Rpl7a   |
| 1.33E-43 | 0.64 | 0.886 | 0.836 | 4.12E-39 | Lymphocyte | Rpl24   |
| 2.84E-43 | 0.79 | 0.81  | 0.744 | 8.79E-39 | Lymphocyte | Rbm3    |
| 8.64E-42 | 1.15 | 0.692 | 0.506 | 2.68E-37 | Lymphocyte | Zfp36l2 |
| 9.95E-42 | 0.81 | 0.634 | 0.36  | 3.08E-37 | Lymphocyte | Msn     |
| 1.38E-41 | 1.09 | 0.674 | 0.465 | 4.28E-37 | Lymphocyte | Hmgb2   |
| 4.78E-41 | 0.94 | 0.608 | 0.357 | 1.48E-36 | Lymphocyte | Akap13  |
| 1.17E-40 | 0.82 | 0.736 | 0.552 | 3.61E-36 | Lymphocyte | Srsf7   |
| 2.14E-40 | 0.58 | 0.938 | 0.909 | 6.64E-36 | Lymphocyte | Pfdn5   |
| 3.82E-40 | 0.98 | 0.652 | 0.443 | 1.18E-35 | Lymphocyte | Ankrd11 |
| 9.26E-40 | 0.82 | 0.791 | 0.74  | 2.87E-35 | Lymphocyte | Uba52   |
| 9.76E-40 | 0.81 | 0.674 | 0.446 | 3.02E-35 | Lymphocyte | Tpm3    |
| 2.01E-38 | 0.87 | 0.689 | 0.501 | 6.22E-34 | Lymphocyte | Jak1    |
| 3.25E-38 | 0.91 | 0.689 | 0.434 | 1.01E-33 | Lymphocyte | Ier2    |
| 8.37E-38 | 0.81 | 0.744 | 0.589 | 2.59E-33 | Lymphocyte | Clk1    |
| 1.03E-37 | 0.84 | 0.791 | 0.718 | 3.19E-33 | Lymphocyte | Arcp3   |
| 3.45E-37 | 0.61 | 0.883 | 0.812 | 1.07E-32 | Lymphocyte | Calm1   |
| 6.28E-37 | 0.90 | 0.645 | 0.447 | 1.94E-32 | Lymphocyte | Fam107b |
| 1.84E-36 | 0.80 | 0.711 | 0.55  | 5.71E-32 | Lymphocyte | Rap1b   |
| 6.89E-36 | 0.60 | 0.897 | 0.853 | 2.14E-31 | Lymphocyte | Npm1    |
| 1.75E-35 | 0.58 | 0.982 | 0.97  | 5.41E-31 | Lymphocyte | Ptma    |
| 3.28E-35 | 0.76 | 0.667 | 0.454 | 1.02E-30 | Lymphocyte | Tra2a   |
| 4.44E-34 | 0.58 | 0.93  | 0.906 | 1.37E-29 | Lymphocyte | Ddx5    |
| 5.34E-33 | 0.82 | 0.678 | 0.546 | 1.66E-28 | Lymphocyte | Snrpg   |
| 7.32E-33 | 0.66 | 0.777 | 0.751 | 2.27E-28 | Lymphocyte | Eif3h   |
| 1.54E-30 | 0.73 | 0.729 | 0.592 | 4.77E-26 | Lymphocyte | Clic1   |
| 2.54E-30 | 0.58 | 0.817 | 0.759 | 7.86E-26 | Lymphocyte | Arcp2   |
| 7.24E-29 | 0.62 | 0.733 | 0.63  | 2.24E-24 | Lymphocyte | Hnrnpa0 |
| 2.21E-27 | 0.53 | 0.747 | 0.64  | 6.83E-23 | Lymphocyte | Gnai2   |
| 5.62E-27 | 0.70 | 0.813 | 0.76  | 1.74E-22 | Lymphocyte | S100a10 |
| 8.55E-27 | 0.78 | 0.604 | 0.448 | 2.65E-22 | Lymphocyte | Psme1   |
| 1.07E-26 | 0.61 | 0.766 | 0.737 | 3.32E-22 | Lymphocyte | Cdc42   |
| 1.09E-26 | 0.58 | 0.821 | 0.807 | 3.37E-22 | Lymphocyte | Rpl22l1 |
| 1.28E-25 | 0.57 | 0.813 | 0.825 | 3.97E-21 | Lymphocyte | Rpl31   |
| 6.53E-25 | 0.67 | 0.63  | 0.505 | 2.02E-20 | Lymphocyte | Nop53   |
| 9.27E-25 | 0.68 | 0.659 | 0.536 | 2.87E-20 | Lymphocyte | Cd47    |
| 4.75E-24 | 0.60 | 0.703 | 0.687 | 1.47E-19 | Lymphocyte | Sec61b  |
| 4.06E-23 | 0.54 | 0.63  | 0.457 | 1.26E-18 | Lymphocyte | Selenow |
| 6.47E-23 | 0.75 | 0.791 | 0.786 | 2.01E-18 | Lymphocyte | H2az1   |
| 4.44E-22 | 0.72 | 0.663 | 0.601 | 1.37E-17 | Lymphocyte | Dnajb6  |
| 2.47E-21 | 0.51 | 0.795 | 0.787 | 7.65E-17 | Lymphocyte | Dad1    |
| 1.06E-18 | 0.55 | 0.619 | 0.539 | 3.30E-14 | Lymphocyte | Arcp5   |
| 2.50E-18 | 0.53 | 0.736 | 0.751 | 7.75E-14 | Lymphocyte | Sumo2   |
| 5.13E-17 | 0.53 | 0.736 | 0.762 | 1.59E-12 | Lymphocyte | Cnbp    |
| 5.34E-17 | 0.59 | 0.674 | 0.652 | 1.65E-12 | Lymphocyte | Sfpq    |
| 2.05E-16 | 0.52 | 0.674 | 0.638 | 6.35E-12 | Lymphocyte | Sf3b1   |
| 8.67E-16 | 0.69 | 0.714 | 0.752 | 2.68E-11 | Lymphocyte | Dnaja1  |
| 1.69E-15 | 0.63 | 0.619 | 0.584 | 5.22E-11 | Lymphocyte | Prrc2c  |
| 2.53E-15 | 0.56 | 0.7   | 0.732 | 7.84E-11 | Lymphocyte | Hnrnpf  |

|          |      |       |       |          |            |        |
|----------|------|-------|-------|----------|------------|--------|
| 6.51E-15 | 0.56 | 0.659 | 0.688 | 2.02E-10 | Lymphocyte | Eef1g  |
| 8.30E-15 | 0.69 | 0.623 | 0.634 | 2.57E-10 | Lymphocyte | Serp1  |
| 2.91E-14 | 0.67 | 0.615 | 0.558 | 9.01E-10 | Lymphocyte | Tagln2 |
| 3.57E-14 | 0.54 | 0.659 | 0.626 | 1.11E-09 | Lymphocyte | Srsf3  |



## Supplemental Table 2. KEGG pathway analysis for podocyte clusters

### Cluster Podocyte-1 ANALYSIS

Significant Pathways (73)

| Link to KEGG Pathway | Pathway Description (KEGG)                               | Number Genes in Pathway | Number Regulated Genes | P-value  | FDR      |
|----------------------|----------------------------------------------------------|-------------------------|------------------------|----------|----------|
| mmu04514             | Cell adhesion molecules (CAMs)                           | 169                     | 9                      | 2.42E-05 | 1.36E-03 |
| mmu04010             | MAPK signaling pathway                                   | 294                     | 11                     | 7.93E-05 | 3.20E-03 |
| mmu04350             | TGF-beta signaling pathway                               | 84                      | 5                      | 1.00E-03 | 2.28E-02 |
| mmu04014             | Ras signaling pathway                                    | 233                     | 8                      | 1.32E-03 | 2.76E-02 |
| mmu04550             | Signaling pathways regulating pluripotency of stem cells | 137                     | 6                      | 1.57E-03 | 3.17E-02 |
| mmu04151             | PI3K-Akt signaling pathway                               | 358                     | 10                     | 1.62E-03 | 3.25E-02 |

### Cluster Podocyte-2 ANALYSIS

Significant Pathways (37)

| Link to KEGG Pathway | Pathway Description (KEGG)       | Number Genes in Pathway | Number Regulated Genes | P-value  | FDR      |
|----------------------|----------------------------------|-------------------------|------------------------|----------|----------|
| mmu04512             | ECM-receptor interaction         | 83                      | 7                      | 6.37E-07 | 3.36E-04 |
| mmu04510             | Focal adhesion                   | 199                     | 8                      | 2.57E-05 | 4.51E-03 |
| mmu04810             | Regulation of actin cytoskeleton | 215                     | 7                      | 3.08E-04 | 2.26E-02 |
| mmu04530             | Tight junction                   | 167                     | 6                      | 4.99E-04 | 3.10E-02 |
| mmu04514             | Cell adhesion molecules (CAMs)   | 169                     | 6                      | 5.32E-04 | 3.23E-02 |
| mmu04974             | Protein digestion and absorption | 90                      | 4                      | 2.08E-03 | 8.27E-02 |

### Cluster Podocyte-3 ANALYSIS

Significant Pathways (60)

| Link to KEGG Pathway | Pathway Description (KEGG)             | Number Genes in Pathway | Number Regulated Genes | P-value  | FDR      |
|----------------------|----------------------------------------|-------------------------|------------------------|----------|----------|
| mmu05418             | Fluid shear stress and atherosclerosis | 143                     | 8                      | 1.98E-05 | 3.13E-03 |
| mmu04668             | TNF signaling pathway                  | 110                     | 7                      | 2.91E-05 | 4.09E-03 |
| mmu04514             | Cell adhesion molecules (CAMs)         | 169                     | 7                      | 4.26E-04 | 2.64E-02 |
| mmu04010             | MAPK signaling pathway                 | 294                     | 9                      | 6.10E-04 | 3.20E-02 |
| mmu04657             | IL-17 signaling pathway                | 91                      | 5                      | 8.20E-04 | 3.81E-02 |
| mmu04371             | Apelin signaling pathway               | 139                     | 6                      | 8.89E-04 | 3.98E-02 |

### Cluster Podocyte-4 ANALYSIS

Significant Pathways (50)

| Link to KEGG Pathway | Pathway Description (KEGG)       | Number Genes in Pathway | Number Regulated Genes | P-value  | FDR      |
|----------------------|----------------------------------|-------------------------|------------------------|----------|----------|
| mmu04022             | cGMP-PKG signaling pathway       | 168                     | 11                     | 2.18E-09 | 7.65E-07 |
| mmu04024             | cAMP signaling pathway           | 198                     | 11                     | 1.22E-08 | 3.69E-06 |
| mmu04510             | Focal adhesion                   | 199                     | 11                     | 1.29E-08 | 3.69E-06 |
| mmu04371             | Apelin signaling pathway         | 139                     | 9                      | 7.48E-08 | 1.97E-05 |
| mmu04810             | Regulation of actin cytoskeleton | 215                     | 10                     | 3.07E-07 | 6.93E-05 |
| mmu04530             | Tight junction                   | 167                     | 6                      | 3.28E-04 | 2.47E-02 |

### Cluster Podocyte-5 ANALYSIS

Significant Pathways (26)

| Link to KEGG Pathway | Pathway Description (KEGG)           | Number Genes in Pathway | Number Regulated Genes | P-value  | FDR      |
|----------------------|--------------------------------------|-------------------------|------------------------|----------|----------|
| mmu04512             | ECM-receptor interaction             | 83                      | 4                      | 3.95E-05 | 1.54E-02 |
| mmu04510             | Focal adhesion                       | 199                     | 4                      | 1.12E-03 | 1.38E-01 |
| mmu04657             | IL-17 signaling pathway              | 91                      | 3                      | 1.21E-03 | 1.38E-01 |
| mmu04350             | TGF-beta signaling pathway           | 84                      | 2                      | 1.61E-02 | 6.89E-01 |
| mmu04974             | Protein digestion and absorption     | 90                      | 2                      | 1.84E-02 | 7.08E-01 |
| mmu04620             | Toll-like receptor signaling pathway | 99                      | 2                      | 2.20E-02 | 7.53E-01 |

### Cluster Podocyte-6 ANALYSIS

No significant Pathways
