# Supplementary material for: PIK3CA inhibition in models of proliferative glomerulonephritis and lupus nephritis
Source: PubMed Central journal article supplement (PMC11290976; doi:10.1172/jci176402), 2024-06-06

Full unedited gel for Figure 10

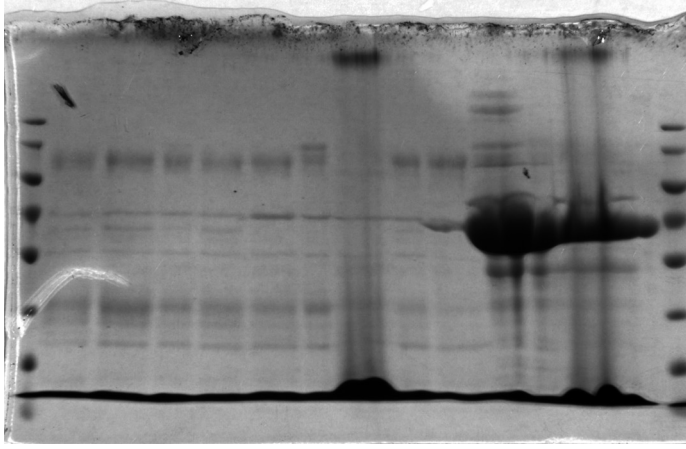

Full unedited blot for Figure 9K

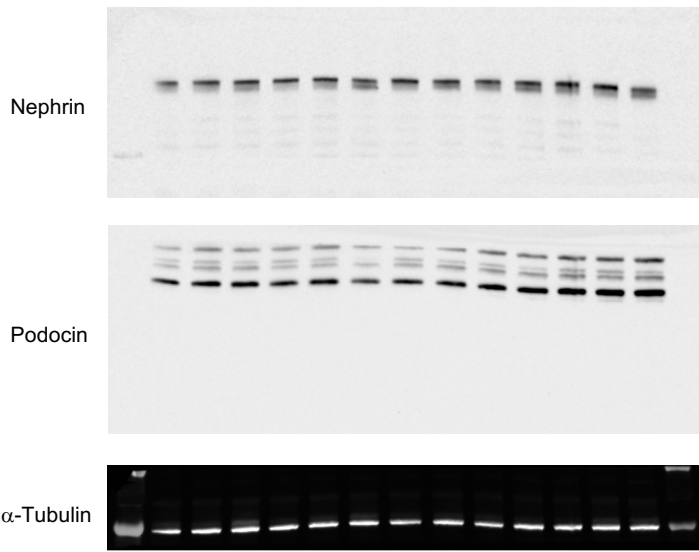

Full unedited blot for Figure 10S

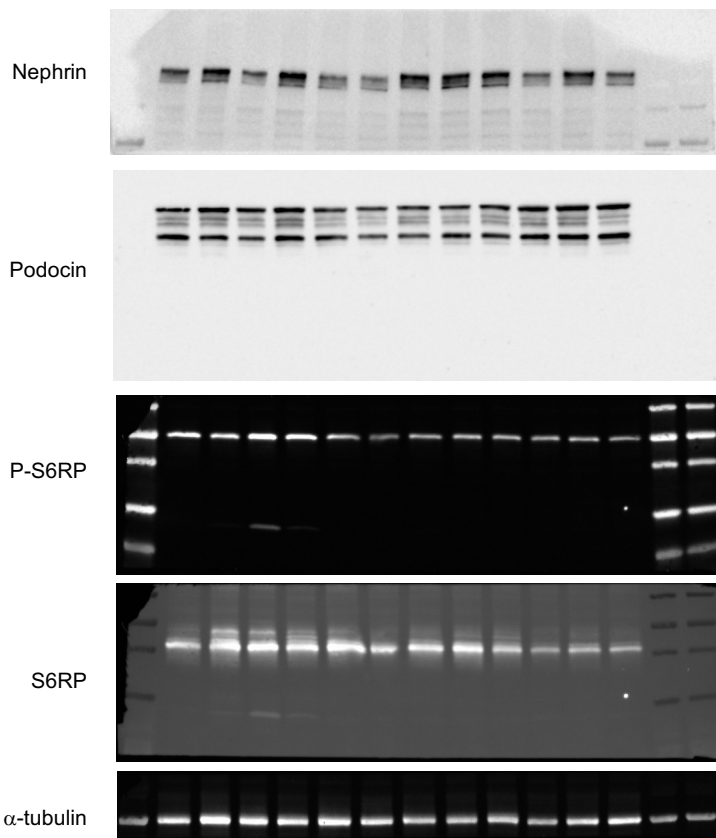

Full unedited gel for Supplemental Figure 1F

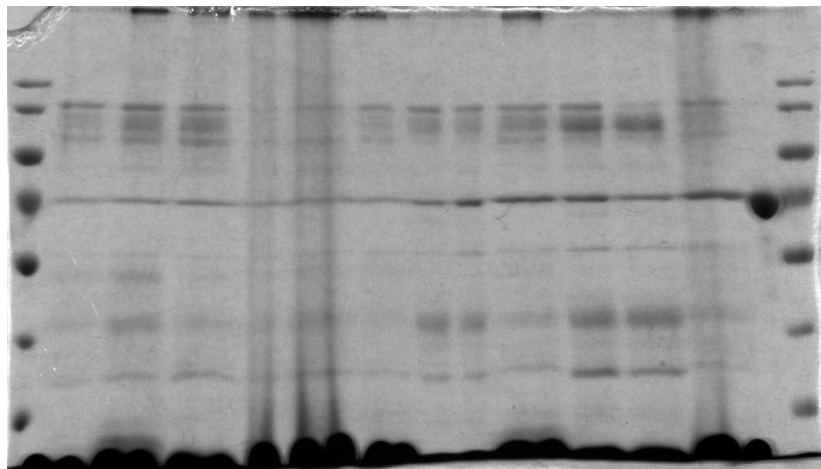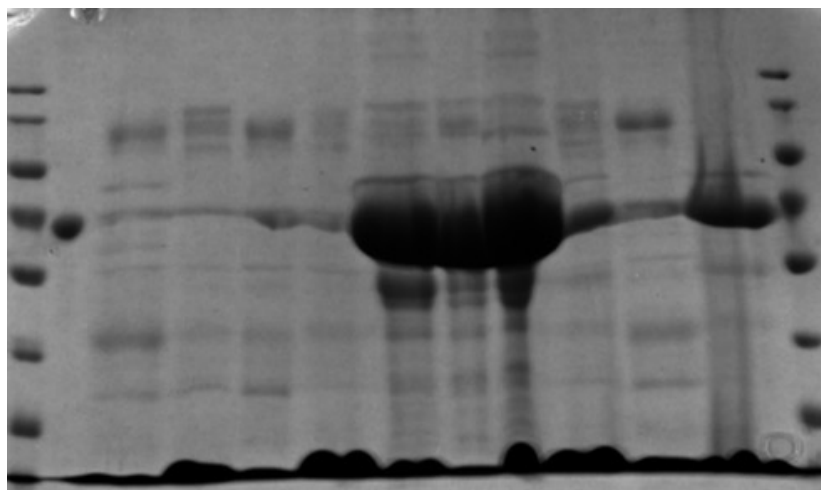

Full unedited gel for Supplemental Figure 5C

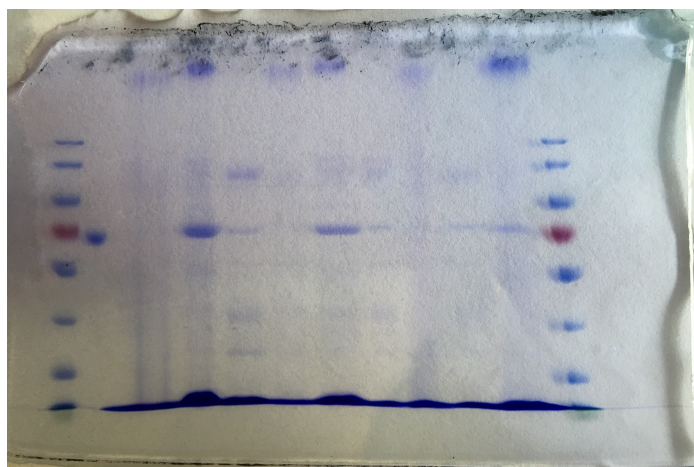

Full unedited blot for Supplemental Figure 9F

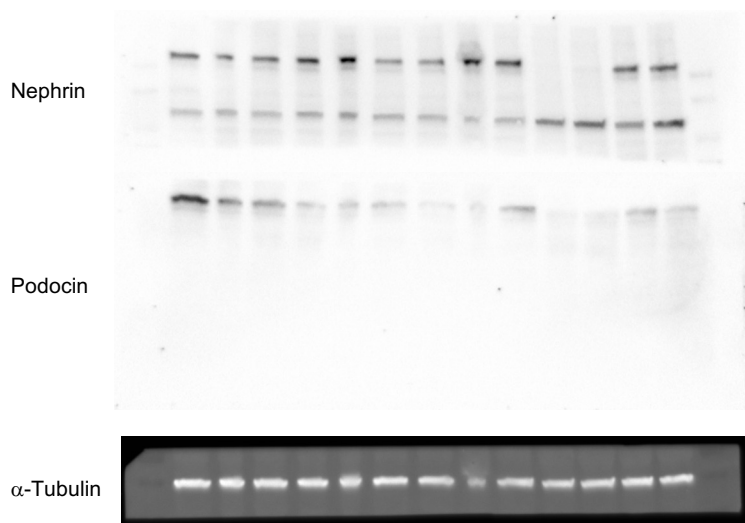

Supplement: jci-134-176402-s110.pdf [file jci-134-176402-s110.pdf]
